# Supplementary material for: Recovering Escherichia coli Plasmids in the Absence of Long-Read Sequencing Data
Source: Microorganisms. 2021 Jul 28;9(8):1613. doi: 10.3390/microorganisms9081613 (PMC8400445; doi:10.3390/microorganisms9081613)
Supplement: Supplementary file 1 [file microorganisms-09-01613-s001.zip]

Archive with 7 entries (7 files):
- Supplementary_Materials.pdf
- Table_S1.xlsx
- Table_S2.csv
- Table_S3.csv
- Table_S4.csv
- Table_S5.csv
- Table_S6.csv
