# Supplementary material for: Recovering Escherichia coli Plasmids in the Absence of Long-Read Sequencing Data
Source: Microorganisms. 2021 Jul 28;9(8):1613. doi: 10.3390/microorganisms9081613 (PMC8400445; doi:10.3390/microorganisms9081613)
Supplement: Supplementary file 1 [file microorganisms-09-01613-s001.zip › Table_S4.csv]

strain	reference_id	plasmid_length	bin_name	alignment_length	bin_length	software	self_alignment_length_new	max_recall	recall_bp	alignment_length_precision	precision_bp	f1_score	chromosome_alignment_length	chromosome_contamination	correct_prediction	all_atbr_count	esbl_count	atbr_carrying	esbl_carrying	atbr_gene_count	total_atbr_in_bin	total_atbr_in_reference	recall_arg
GCA_003812945.1_ASM381294v1	CP033847.1	143865	GCA_003812945.1_ASM381294v1_bin_1	111826	158431	gplas	132597	0.921676571786049	0.777	111826	0.706	0.74	5686	0.0358894408291307	no	1	0	yes	no	1	3	1	1
GCA_003812945.1_ASM381294v1	CP033848.1	97018	GCA_003812945.1_ASM381294v1_bin_1	40845	158431	gplas	94667	0.975767383372158	0.421	40845	0.258	0.32	5686	0.0358894408291307	no	0	0	no	no	NA	NA	NA	NA
GCA_003812945.1_ASM381294v1	CP033849.1	32101	GCA_003812945.1_ASM381294v1_bin_2	29851	29977	gplas	31761	0.989408429643936	0.93	29851	0.996	0.962	0	0	yes	0	0	no	no	NA	NA	NA	NA
GCA_003812945.1_ASM381294v1	CP033851.1	4082	not_detected	0	not_applicable	gplas	4082	1	NA	0	NA	NA	not_applicable	not_applicable	no	0	0	no	no	NA	NA	NA	NA
GCA_003812945.1_ASM381294v1	CP033852.1	1459	GCA_003812945.1_ASM381294v1_bin_4	1459	1536	gplas	1459	1	1	1459	0.95	0.974	0	0	yes	0	0	no	no	NA	NA	NA	NA
GCA_003812945.1_ASM381294v1	CP033853.1	3257	GCA_003812945.1_ASM381294v1_bin_3	3257	3334	gplas	3257	1	1	3257	0.977	0.988	0	0	yes	0	0	no	no	NA	NA	NA	NA
GCA_006352265.1_ASM635226v1	CP040068.1	210031	GCA_006352265.1_ASM635226v1_bin_2	79987	97365	gplas	204329	0.972851626664635	0.381	79987	0.822	0.521	0	0	no	6	0	yes	no	3	8	6	0.5
GCA_006352265.1_ASM635226v1	CP040068.1	210031	GCA_006352265.1_ASM635226v1_bin_1	22246	115152	gplas	204329	0.972851626664635	0.106	22246	0.193	0.137	0	0	no	6	0	yes	no	1	1	6	0.166666666666667
GCA_006352265.1_ASM635226v1	CP040068.1	210031	GCA_006352265.1_ASM635226v1_bin_3	90722	90788	gplas	204329	0.972851626664635	0.432	90722	0.999	0.603	0	0	no	6	0	yes	no	NA	NA	NA	NA
GCA_006352265.1_ASM635226v1	CP040069.1	97582	GCA_006352265.1_ASM635226v1_bin_1	92906	115152	gplas	96632	0.990264597979135	0.952	92906	0.807	0.874	0	0	no	0	0	no	no	NA	NA	NA	NA
GCA_006352265.1_ASM635226v1	CP040070.1	82718	GCA_006352265.1_ASM635226v1_bin_2	17278	97365	gplas	72945	0.881851592156483	0.209	17278	0.177	0.192	0	0	no	5	0	yes	no	5	8	5	1
GCA_006352265.1_ASM635226v1	CP040070.1	82718	GCA_006352265.1_ASM635226v1_bin_4	44777	64072	gplas	72945	0.881851592156483	0.541	44777	0.699	0.61	19295	0.301145586215508	no	5	0	yes	no	NA	NA	NA	NA
GCA_006352265.1_ASM635226v1	CP040071.1	7406	not_detected	0	not_applicable	gplas	7145	0.964758304077775	NA	0	NA	NA	not_applicable	not_applicable	no	1	0	yes	no	NA	NA	1	NA
GCA_006352265.1_ASM635226v1	CP040072.1	5221	GCA_006352265.1_ASM635226v1_bin_5	5221	5298	gplas	5221	1	1	5221	0.985	0.992	0	0	yes	0	0	no	no	NA	NA	NA	NA
GCA_006352265.1_ASM635226v1	CP040073.1	1806	not_detected	0	not_applicable	gplas	0	0	NA	0	NA	NA	not_applicable	not_applicable	no	0	0	no	no	NA	NA	NA	NA
GCA_006352265.1_ASM635226v1	CP040074.1	1445	not_detected	0	not_applicable	gplas	1072	0.741868512110727	NA	0	NA	NA	not_applicable	not_applicable	no	0	0	no	no	NA	NA	NA	NA
GCA_006352265.1_ASM635226v1	CP040075.1	1265	not_detected	0	not_applicable	gplas	0	0	NA	0	NA	NA	not_applicable	not_applicable	no	0	0	no	no	NA	NA	NA	NA
GCA_006352265.1_ASM635226v1	CP040076.1	763	not_detected	0	not_applicable	gplas	0	0	NA	0	NA	NA	not_applicable	not_applicable	no	0	0	no	no	NA	NA	NA	NA
GCA_009720465.1_ASM972046v1	CP041956.1	74945	GCA_009720465.1_ASM972046v1_bin_2	46699	52595	gplas	66999	0.893975582093535	0.623	46699	0.888	0.732	0	0	no	7	1	yes	yes	6	8	7	0.857142857142857
GCA_009720465.1_ASM972046v1	CP041957.1	83648	GCA_009720465.1_ASM972046v1_bin_3	60874	60984	gplas	74289	0.88811447972456	0.728	60874	0.998	0.842	0	0	no	5	0	yes	no	NA	NA	NA	NA
GCA_009720465.1_ASM972046v1	CP041957.1	83648	GCA_009720465.1_ASM972046v1_bin_2	5634	52595	gplas	74289	0.88811447972456	0.067	5634	0.107	0.082	0	0	no	5	0	yes	no	2	8	5	0.4
GCA_009720465.1_ASM972046v1	CP041958.1	4072	GCA_009720465.1_ASM972046v1_bin_4	4072	4149	gplas	4072	1	1	4072	0.981	0.99	0	0	yes	0	0	no	no	NA	NA	NA	NA
GCA_009720465.1_ASM972046v1	CP041959.1	84917	GCA_009720465.1_ASM972046v1_bin_1	80718	80826	gplas	80718	0.950551715204258	0.951	80718	0.999	0.974	0	0	yes	1	0	yes	no	1	1	1	1
GCA_009720465.1_ASM972046v1	CP041960.1	98151	not_detected	0	not_applicable	gplas	94360	0.961375839268067	NA	0	NA	NA	not_applicable	not_applicable	no	0	0	no	no	NA	NA	NA	NA
GCA_009905115.1_ASM990511v1	CP047572.1	127645	GCA_009905115.1_ASM990511v1_bin_5	25237	33217	gplas	115349	0.903670335696659	0.198	25237	0.76	0.314	1542	0.0464220128247584	no	6	1	yes	yes	NA	NA	NA	NA
GCA_009905115.1_ASM990511v1	CP047572.1	127645	GCA_009905115.1_ASM990511v1_bin_3	3489	19897	gplas	115349	0.903670335696659	0.027	3489	0.175	0.047	0	0	no	6	1	yes	yes	2	3	6	0.333333333333333
GCA_009905115.1_ASM990511v1	CP047572.1	127645	GCA_009905115.1_ASM990511v1_bin_2	1318	33113	gplas	115349	0.903670335696659	0.01	1318	0.04	0.016	1612	0.0486817866094887	no	6	1	yes	yes	NA	NA	NA	NA
GCA_009905115.1_ASM990511v1	CP047573.1	113013	GCA_009905115.1_ASM990511v1_bin_3	16408	19897	gplas	93404	0.826488987992532	0.145	16408	0.825	0.247	0	0	no	8	0	yes	no	1	3	8	0.125
GCA_009905115.1_ASM990511v1	CP047573.1	113013	GCA_009905115.1_ASM990511v1_bin_1	56483	56489	gplas	93404	0.826488987992532	0.5	56483	1	0.667	0	0	no	8	0	yes	no	NA	NA	NA	NA
GCA_009905115.1_ASM990511v1	CP047573.1	113013	GCA_009905115.1_ASM990511v1_bin_2	1548	33113	gplas	93404	0.826488987992532	0.014	1548	0.047	0.022	1612	0.0486817866094887	no	8	0	yes	no	NA	NA	NA	NA
GCA_009905115.1_ASM990511v1	CP047574.1	64451	GCA_009905115.1_ASM990511v1_bin_5	6438	33217	gplas	54324	0.842872880172534	0.1	6438	0.194	0.132	1542	0.0464220128247584	no	0	0	no	no	NA	NA	NA	NA
GCA_009905115.1_ASM990511v1	CP047574.1	64451	GCA_009905115.1_ASM990511v1_bin_2	28635	33113	gplas	54324	0.842872880172534	0.444	28635	0.865	0.587	1612	0.0486817866094887	no	0	0	no	no	NA	NA	NA	NA
GCA_009905115.1_ASM990511v1	CP047575.1	2312	not_detected	0	not_applicable	gplas	0	0	NA	0	NA	NA	not_applicable	not_applicable	no	0	0	no	no	NA	NA	NA	NA
GCA_009905135.1_ASM990513v1	CP047577.1	178137	GCA_009905135.1_ASM990513v1_bin_1	109525	222370	gplas	157003	0.881360974979931	0.615	109525	0.493	0.547	0	0	no	4	0	yes	no	3	5	4	0.75
GCA_009905135.1_ASM990513v1	CP047578.1	134426	GCA_009905135.1_ASM990513v1_bin_1	30880	222370	gplas	118404	0.880811747727374	0.23	30880	0.139	0.173	0	0	no	7	1	yes	yes	1	5	7	0.142857142857143
GCA_009905135.1_ASM990513v1	CP047579.1	60960	GCA_009905135.1_ASM990513v1_bin_1	53222	222370	gplas	59510	0.976213910761155	0.873	53222	0.239	0.375	0	0	no	1	0	yes	no	1	5	1	1
GCA_009905135.1_ASM990513v1	CP047580.1	47443	GCA_009905135.1_ASM990513v1_bin_1	28687	222370	gplas	44469	0.937314250785153	0.605	28687	0.129	0.213	0	0	no	0	0	no	no	NA	NA	NA	NA
GCA_009905135.1_ASM990513v1	CP047581.1	6647	GCA_009905135.1_ASM990513v1_bin_2	6647	6724	gplas	6647	1	1	6647	0.989	0.994	0	0	yes	0	0	no	no	NA	NA	NA	NA
GCA_009905135.1_ASM990513v1	CP047582.1	1506	not_detected	0	not_applicable	gplas	0	0	NA	0	NA	NA	not_applicable	not_applicable	no	0	0	no	no	NA	NA	NA	NA
GCA_010706435.1_ASM1070643v1	CP048648.1	126964	GCA_010706435.1_ASM1070643v1_bin_1	114169	114310	gplas	121033	0.953285970826376	0.899	114169	0.999	0.946	0	0	no	2	0	yes	no	2	2	2	1
GCA_011330935.1_ASM1133093v1	CP049078.1	70740	GCA_011330935.1_ASM1133093v1_bin_2	11656	11683	gplas	20906	0.29553293751767	0.165	11656	0.998	0.283	0	0	no	0	0	no	no	NA	NA	NA	NA
GCA_011330935.1_ASM1133093v1	CP049078.1	70740	GCA_011330935.1_ASM1133093v1_bin_3	3501	10047	gplas	20906	0.29553293751767	0.049	3501	0.348	0.086	0	0	no	0	0	no	no	NA	NA	NA	NA
GCA_011330935.1_ASM1133093v1	CP049079.1	180963	GCA_011330935.1_ASM1133093v1_bin_4	5575	5575	gplas	111257	0.614805236429546	0.031	5575	1	0.06	5575	1	no	9	1	yes	yes	3	3	9	0.333333333333333
GCA_011330935.1_ASM1133093v1	CP049079.1	180963	GCA_011330935.1_ASM1133093v1_bin_1	47412	51533	gplas	111257	0.614805236429546	0.262	47412	0.92	0.408	0	0	no	9	1	yes	yes	5	5	9	0.555555555555556
GCA_011330935.1_ASM1133093v1	CP049079.1	180963	GCA_011330935.1_ASM1133093v1_bin_3	6546	10047	gplas	111257	0.614805236429546	0.036	6546	0.652	0.068	0	0	no	9	1	yes	yes	NA	NA	NA	NA
GCA_011331065.1_ASM1133106v1	CP049082.1	143163	GCA_011331065.1_ASM1133106v1_bin_1	99069	130024	gplas	129388	0.903781004868576	0.692	99069	0.762	0.725	30883	0.237517689042023	no	7	1	yes	yes	4	4	7	0.571428571428571
GCA_011331065.1_ASM1133106v1	CP049083.1	6800	not_detected	0	not_applicable	gplas	6018	0.885	NA	0	NA	NA	not_applicable	not_applicable	no	3	0	yes	no	NA	NA	3	NA
GCA_011331065.1_ASM1133106v1	CP049080.1	3372	not_detected	0	not_applicable	gplas	0	0	NA	0	NA	NA	not_applicable	not_applicable	no	0	0	no	no	NA	NA	NA	NA
GCA_011331065.1_ASM1133106v1	CP049084.1	3173	GCA_011331065.1_ASM1133106v1_bin_3	3173	3230	gplas	3173	1	1	3173	0.982	0.991	0	0	yes	0	0	no	no	NA	NA	NA	NA
GCA_011843745.2_ASM1184374v2	CP058232.1	94605	GCA_011843745.2_ASM1184374v2_bin_1	87379	87736	gplas	87379	0.923619259024364	0.924	87379	0.996	0.959	0	0	yes	0	0	no	no	NA	NA	NA	NA
GCA_011849985.2_ASM1184998v2	CP058234.1	94600	GCA_011849985.2_ASM1184998v2_bin_1	76776	77138	gplas	87375	0.923625792811839	0.812	76776	0.995	0.894	0	0	no	0	0	no	no	NA	NA	NA	NA
GCA_012044775.1_ASM1204477v1	CP050647.1	107449	not_detected	0	not_applicable	gplas	105548	0.982307885601541	NA	0	NA	NA	not_applicable	not_applicable	no	0	0	no	no	NA	NA	NA	NA
GCA_012221365.1_ASM1222136v1	CP050863.1	233798	GCA_012221365.1_ASM1222136v1_bin_1	118094	158865	gplas	175250	0.749578696139402	0.505	118094	0.743	0.601	40712	0.256267900418594	no	0	0	no	no	NA	NA	NA	NA
GCA_012221365.1_ASM1222136v1	CP050864.1	7120	not_detected	0	not_applicable	gplas	6719	0.943679775280899	NA	0	NA	NA	not_applicable	not_applicable	no	0	0	no	no	NA	NA	NA	NA
GCA_012221565.1_ASM1222156v1	CP050866.1	233800	GCA_012221565.1_ASM1222156v1_bin_1	106806	132288	gplas	175748	0.751702309666382	0.457	106806	0.807	0.584	25455	0.192421081277213	no	0	0	no	no	NA	NA	NA	NA
GCA_012221565.1_ASM1222156v1	CP050867.1	7413	not_detected	0	not_applicable	gplas	6719	0.906380682584649	NA	0	NA	NA	not_applicable	not_applicable	no	0	0	no	no	NA	NA	NA	NA
GCA_012849755.1_ASM1284975v1	CP051632.1	81965	GCA_012849755.1_ASM1284975v1_bin_1	18115	18116	gplas	48873	0.596266699200878	0.221	18115	1	0.362	0	0	no	0	0	no	no	NA	NA	NA	NA
GCA_012849755.1_ASM1284975v1	CP051632.1	81965	GCA_012849755.1_ASM1284975v1_bin_2	6027	11683	gplas	48873	0.596266699200878	0.074	6027	0.516	0.129	5656	0.484122228879569	no	0	0	no	no	NA	NA	NA	NA
GCA_013372305.1_ASM1337230v1	CP054215.1	89178	GCA_013372305.1_ASM1337230v1_bin_2	26186	26327	gplas	77075	0.864282670613829	0.294	26186	0.995	0.454	0	0	no	6	0	yes	no	NA	NA	NA	NA
GCA_013372305.1_ASM1337230v1	CP054215.1	89178	GCA_013372305.1_ASM1337230v1_bin_3	38321	38383	gplas	77075	0.864282670613829	0.43	38321	0.998	0.601	0	0	no	6	0	yes	no	2	2	6	0.333333333333333
GCA_013372305.1_ASM1337230v1	CP054216.1	88657	GCA_013372305.1_ASM1337230v1_bin_1	36683	36683	gplas	83003	0.93622612991642	0.414	36683	1	0.586	0	0	no	0	0	no	no	NA	NA	NA	NA
GCA_013372305.1_ASM1337230v1	CP054217.1	5167	GCA_013372305.1_ASM1337230v1_bin_4	5167	5244	gplas	5167	1	1	5167	0.985	0.992	0	0	yes	0	0	no	no	NA	NA	NA	NA
GCA_013372305.1_ASM1337230v1	CP054218.1	2113	not_detected	0	not_applicable	gplas	2113	1	NA	0	NA	NA	not_applicable	not_applicable	no	0	0	no	no	NA	NA	NA	NA
GCA_013372325.1_ASM1337232v1	CP054220.1	128954	GCA_013372325.1_ASM1337232v1_bin_1	108999	128096	gplas	116678	0.904803263179118	0.845	108999	0.851	0.848	2012	0.0157069697726705	no	1	0	yes	no	1	1	1	1
GCA_013372325.1_ASM1337232v1	CP054221.1	86740	GCA_013372325.1_ASM1337232v1_bin_1	16817	128096	gplas	81162	0.935692875259396	0.194	16817	0.131	0.156	2012	0.0157069697726705	no	0	0	no	no	NA	NA	NA	NA
GCA_013372325.1_ASM1337232v1	CP054222.1	5167	GCA_013372325.1_ASM1337232v1_bin_2	4379	4379	gplas	4379	0.84749371008322	0.847	4379	1	0.917	0	0	no	0	0	no	no	NA	NA	NA	NA
GCA_013372325.1_ASM1337232v1	CP054223.1	1506	not_detected	0	not_applicable	gplas	0	0	NA	0	NA	NA	not_applicable	not_applicable	no	0	0	no	no	NA	NA	NA	NA
GCA_013372345.1_ASM1337234v1	CP054225.1	123935	GCA_013372345.1_ASM1337234v1_bin_1	36383	39134	gplas	104454	0.842812764755719	0.294	36383	0.93	0.447	2751	0.0702969285020698	no	0	0	no	no	NA	NA	NA	NA
GCA_013372345.1_ASM1337234v1	CP054226.1	5658	GCA_013372345.1_ASM1337234v1_bin_2	5658	5735	gplas	5658	1	1	5658	0.987	0.993	0	0	yes	0	0	no	no	NA	NA	NA	NA
GCA_013372365.1_ASM1337236v1	CP054228.1	135461	GCA_013372365.1_ASM1337236v1_bin_1	127731	127778	gplas	135104	0.997364555111803	0.943	127731	1	0.971	0	0	yes	0	0	no	no	NA	NA	NA	NA
GCA_013372365.1_ASM1337236v1	CP054229.1	6431	GCA_013372365.1_ASM1337236v1_bin_2	6301	6460	gplas	6301	0.979785414399005	0.98	6301	0.975	0.977	0	0	yes	0	0	no	no	NA	NA	NA	NA
GCA_013372385.1_ASM1337238v1	CP054231.1	7154	not_detected	0	not_applicable	gplas	7154	1	NA	0	NA	NA	not_applicable	not_applicable	no	0	0	no	no	NA	NA	NA	NA
GCA_013372405.1_ASM1337240v1	CP054233.1	129632	GCA_013372405.1_ASM1337240v1_bin_2	31134	31134	gplas	115425	0.890405146877314	0.24	31134	1	0.387	0	0	no	1	0	yes	no	NA	NA	NA	NA
GCA_013372405.1_ASM1337240v1	CP054233.1	129632	GCA_013372405.1_ASM1337240v1_bin_1	62783	62792	gplas	115425	0.890405146877314	0.484	62783	1	0.652	0	0	no	1	0	yes	no	NA	NA	NA	NA
GCA_013372405.1_ASM1337240v1	CP054234.1	4072	not_detected	0	not_applicable	gplas	4072	1	NA	0	NA	NA	not_applicable	not_applicable	no	0	0	no	no	NA	NA	NA	NA
GCA_013372405.1_ASM1337240v1	CP054235.1	1551	GCA_013372405.1_ASM1337240v1_bin_3	1551	1628	gplas	1551	1	1	1551	0.953	0.976	0	0	yes	0	0	no	no	NA	NA	NA	NA
GCA_013372425.1_ASM1337242v1	CP054237.1	131660	GCA_013372425.1_ASM1337242v1_bin_1	104870	123953	gplas	122246	0.928497645450403	0.797	104870	0.846	0.821	19083	0.153953514638613	no	7	0	yes	no	4	4	7	0.571428571428571
GCA_013372425.1_ASM1337242v1	CP054238.1	1546	GCA_013372425.1_ASM1337242v1_bin_2	1472	1623	gplas	1472	0.952134540750323	0.952	1472	0.907	0.929	0	0	no	0	0	no	no	NA	NA	NA	NA
GCA_013374235.1_ASM1337423v1	AP023220.1	97234	GCA_013374235.1_ASM1337423v1_bin_2	2367	7459	gplas	60100	0.6180965505893	0.024	2367	0.317	0.045	0	0	no	9	0	yes	no	NA	NA	NA	NA
GCA_013374235.1_ASM1337423v1	AP023220.1	97234	GCA_013374235.1_ASM1337423v1_bin_4	6041	15216	gplas	60100	0.6180965505893	0.062	6041	0.397	0.107	1723	0.113236067297581	no	9	0	yes	no	NA	NA	NA	NA
GCA_013374235.1_ASM1337423v1	AP023220.1	97234	GCA_013374235.1_ASM1337423v1_bin_3	31807	84679	gplas	60100	0.6180965505893	0.327	31807	0.376	0.35	16756	0.197876687254219	no	9	0	yes	no	6	9	9	0.666666666666667
GCA_013374235.1_ASM1337423v1	AP023221.1	130968	GCA_013374235.1_ASM1337423v1_bin_2	5090	7459	gplas	96514	0.736928104575163	0.039	5090	0.682	0.074	0	0	no	4	1	yes	yes	NA	NA	NA	NA
GCA_013374235.1_ASM1337423v1	AP023221.1	130968	GCA_013374235.1_ASM1337423v1_bin_4	7397	15216	gplas	96514	0.736928104575163	0.056	7397	0.486	0.1	1723	0.113236067297581	no	4	1	yes	yes	NA	NA	NA	NA
GCA_013374235.1_ASM1337423v1	AP023221.1	130968	GCA_013374235.1_ASM1337423v1_bin_3	36116	84679	gplas	96514	0.736928104575163	0.276	36116	0.427	0.335	16756	0.197876687254219	no	4	1	yes	yes	1	9	4	0.25
GCA_013374235.1_ASM1337423v1	AP023222.1	98308	GCA_013374235.1_ASM1337423v1_bin_1	64652	64652	gplas	96020	0.976726207429711	0.658	64652	1	0.794	0	0	no	0	0	no	no	NA	NA	NA	NA
GCA_013374235.1_ASM1337423v1	AP023223.1	2188	not_detected	0	not_applicable	gplas	2101	0.960237659963437	NA	0	NA	NA	not_applicable	not_applicable	no	0	0	no	no	NA	NA	NA	NA
GCA_013374255.1_ASM1337425v1	AP023225.1	108281	GCA_013374255.1_ASM1337425v1_bin_1	71057	73866	gplas	92409	0.85341842059087	0.656	71057	0.962	0.78	2808	0.0380147835269271	no	19	1	yes	yes	8	9	19	0.421052631578947
GCA_013374275.1_ASM1337427v1	AP023227.1	44962	GCA_013374275.1_ASM1337427v1_bin_4	43924	55459	gplas	43924	0.976913838352386	0.977	43924	0.792	0.875	11425	0.206008041976956	no	2	0	yes	no	2	2	2	1
GCA_013374275.1_ASM1337427v1	AP023228.1	170909	GCA_013374275.1_ASM1337427v1_bin_1	15692	15692	gplas	153708	0.89935579752968	0.092	15692	1	0.168	0	0	no	10	1	yes	yes	NA	NA	NA	NA
GCA_013374275.1_ASM1337427v1	AP023228.1	170909	GCA_013374275.1_ASM1337427v1_bin_3	81456	81458	gplas	153708	0.89935579752968	0.477	81456	1	0.646	0	0	no	10	1	yes	yes	NA	NA	NA	NA
GCA_013374275.1_ASM1337427v1	AP023228.1	170909	GCA_013374275.1_ASM1337427v1_bin_2	38962	38962	gplas	153708	0.89935579752968	0.228	38962	1	0.371	0	0	no	10	1	yes	yes	8	8	10	0.8
GCA_013374275.1_ASM1337427v1	AP023229.1	32452	GCA_013374275.1_ASM1337427v1_bin_5	30207	30207	gplas	32101	0.989184025637865	0.931	30207	1	0.964	0	0	yes	0	0	no	no	NA	NA	NA	NA
GCA_013374295.1_ASM1337429v1	AP023231.1	83461	GCA_013374295.1_ASM1337429v1_bin_3	19123	23137	gplas	51718	0.619666670660548	0.229	19123	0.827	0.359	0	0	no	5	0	yes	no	NA	NA	NA	NA
GCA_013374295.1_ASM1337429v1	AP023231.1	83461	GCA_013374295.1_ASM1337429v1_bin_4	6041	13392	gplas	51718	0.619666670660548	0.072	6041	0.451	0.124	1723	0.12865890083632	no	5	0	yes	no	NA	NA	NA	NA
GCA_013374295.1_ASM1337429v1	AP023232.1	130952	GCA_013374295.1_ASM1337429v1_bin_3	3952	23137	gplas	96240	0.734925774329525	0.03	3952	0.171	0.051	0	0	no	4	1	yes	yes	NA	NA	NA	NA
GCA_013374295.1_ASM1337429v1	AP023232.1	130952	GCA_013374295.1_ASM1337429v1_bin_2	37410	45148	gplas	96240	0.734925774329525	0.286	37410	0.829	0.425	7694	0.170417294232303	no	4	1	yes	yes	2	2	4	0.5
GCA_013374295.1_ASM1337429v1	AP023232.1	130952	GCA_013374295.1_ASM1337429v1_bin_4	5628	13392	gplas	96240	0.734925774329525	0.043	5628	0.42	0.078	1723	0.12865890083632	no	4	1	yes	yes	NA	NA	NA	NA
GCA_013374295.1_ASM1337429v1	AP023233.1	98309	GCA_013374295.1_ASM1337429v1_bin_1	87258	87291	gplas	96017	0.976685756136264	0.888	87258	1	0.941	0	0	no	0	0	no	no	NA	NA	NA	NA
GCA_013374295.1_ASM1337429v1	AP023234.1	2153	not_detected	0	not_applicable	gplas	0	0	NA	0	NA	NA	not_applicable	not_applicable	no	0	0	no	no	NA	NA	NA	NA
GCA_013374315.1_ASM1337431v1	AP023236.1	94613	GCA_013374315.1_ASM1337431v1_bin_3	62317	62337	gplas	89588	0.946888905330134	0.659	62317	1	0.794	0	0	no	9	0	yes	no	1	1	9	0.111111111111111
GCA_013374315.1_ASM1337431v1	AP023236.1	94613	GCA_013374315.1_ASM1337431v1_bin_1	19274	19274	gplas	89588	0.946888905330134	0.204	19274	1	0.339	0	0	no	9	0	yes	no	8	8	9	0.888888888888889
GCA_013374315.1_ASM1337431v1	AP023236.1	94613	GCA_013374315.1_ASM1337431v1_bin_2	8012	8012	gplas	89588	0.946888905330134	0.085	8012	1	0.157	0	0	no	9	0	yes	no	NA	NA	NA	NA
GCA_013376575.1_ASM1337657v1	CP049968.1	230339	GCA_013376575.1_ASM1337657v1_bin_3	44524	45716	gplas	217602	0.944703241743691	0.193	44524	0.974	0.322	0	0	no	4	1	yes	yes	2	3	4	0.5
GCA_013376575.1_ASM1337657v1	CP049969.1	139294	GCA_013376575.1_ASM1337657v1_bin_1	120056	120140	gplas	130744	0.938619035995807	0.862	120056	0.999	0.925	0	0	no	5	0	yes	no	3	3	5	0.6
GCA_013376575.1_ASM1337657v1	CP049969.1	139294	GCA_013376575.1_ASM1337657v1_bin_3	1190	45716	gplas	130744	0.938619035995807	0.009	1190	0.026	0.013	0	0	no	5	0	yes	no	1	3	5	0.2
GCA_013376575.1_ASM1337657v1	CP049970.1	101847	GCA_013376575.1_ASM1337657v1_bin_2	76835	76911	gplas	93873	0.921706088544582	0.754	76835	0.999	0.859	0	0	no	1	0	yes	no	NA	NA	NA	NA
GCA_013376575.1_ASM1337657v1	CP049971.1	4145	GCA_013376575.1_ASM1337657v1_bin_4	4073	4073	gplas	4073	0.982629674306393	0.983	4073	1	0.991	0	0	yes	0	0	no	no	NA	NA	NA	NA
GCA_013376575.1_ASM1337657v1	CP049972.1	3359	GCA_013376575.1_ASM1337657v1_bin_6	3359	3436	gplas	3359	1	1	3359	0.978	0.989	0	0	yes	0	0	no	no	NA	NA	NA	NA
GCA_013376575.1_ASM1337657v1	CP049973.1	2883	GCA_013376575.1_ASM1337657v1_bin_5	2811	2811	gplas	2811	0.975026014568158	0.975	2811	1	0.987	0	0	yes	0	0	no	no	NA	NA	NA	NA
GCA_013376575.1_ASM1337657v1	CP049974.1	1934	not_detected	0	not_applicable	gplas	0	0	NA	0	NA	NA	not_applicable	not_applicable	no	0	0	no	no	NA	NA	NA	NA
GCA_013376575.1_ASM1337657v1	CP049975.1	1780	not_detected	0	not_applicable	gplas	1770	0.99438202247191	NA	0	NA	NA	not_applicable	not_applicable	no	0	0	no	no	NA	NA	NA	NA
GCA_013426075.1_ASM1342607v1	CP058653.1	154098	GCA_013426075.1_ASM1342607v1_bin_3	11219	23174	gplas	143042	0.928253449103817	0.073	11219	0.484	0.127	11924	0.514542159316475	no	4	0	yes	no	NA	NA	NA	NA
GCA_013426075.1_ASM1342607v1	CP058653.1	154098	GCA_013426075.1_ASM1342607v1_bin_1	62866	62866	gplas	143042	0.928253449103817	0.408	62866	1	0.58	0	0	no	4	0	yes	no	2	2	4	0.5
GCA_013426075.1_ASM1342607v1	CP058654.1	89623	not_detected	0	not_applicable	gplas	87772	0.979346819454827	NA	0	NA	NA	not_applicable	not_applicable	no	0	0	no	no	NA	NA	NA	NA
GCA_013426075.1_ASM1342607v1	CP058655.1	2101	not_detected	0	not_applicable	gplas	2101	1	NA	0	NA	NA	not_applicable	not_applicable	no	0	0	no	no	NA	NA	NA	NA
GCA_013426075.1_ASM1342607v1	CP058652.1	34321	GCA_013426075.1_ASM1342607v1_bin_2	33021	33133	gplas	33021	0.96212231578334	0.962	33021	0.997	0.979	0	0	yes	1	1	yes	yes	1	1	1	1
GCA_013426095.1_ASM1342609v1	CP058658.1	122305	GCA_013426095.1_ASM1342609v1_bin_1	75572	87527	gplas	113012	0.92401782429173	0.618	75572	0.863	0.72	11924	0.1362322483348	no	3	0	yes	no	2	2	3	0.666666666666667
GCA_013426095.1_ASM1342609v1	CP058659.1	89623	not_detected	0	not_applicable	gplas	87894	0.980708077167691	NA	0	NA	NA	not_applicable	not_applicable	no	0	0	no	no	NA	NA	NA	NA
GCA_013426095.1_ASM1342609v1	CP058660.1	2101	not_detected	0	not_applicable	gplas	2101	1	NA	0	NA	NA	not_applicable	not_applicable	no	0	0	no	no	NA	NA	NA	NA
GCA_013426095.1_ASM1342609v1	CP058657.1	34321	GCA_013426095.1_ASM1342609v1_bin_2	33021	33133	gplas	33021	0.96212231578334	0.962	33021	0.997	0.979	0	0	yes	1	1	yes	yes	1	1	1	1
GCA_013592195.1_ASM1359219v1	CP055625.1	119408	GCA_013592195.1_ASM1359219v1_bin_1	28693	49650	gplas	85976	0.720018759212113	0.24	28693	0.578	0.339	19428	0.391299093655589	no	1	0	yes	no	NA	NA	NA	NA
GCA_013592195.1_ASM1359219v1	CP055625.1	119408	GCA_013592195.1_ASM1359219v1_bin_2	16430	45597	gplas	85976	0.720018759212113	0.138	16430	0.36	0.2	0	0	no	1	0	yes	no	NA	NA	NA	NA
GCA_013592195.1_ASM1359219v1	CP055626.1	94171	not_detected	0	not_applicable	gplas	88898	0.944006116532691	NA	0	NA	NA	not_applicable	not_applicable	no	0	0	no	no	NA	NA	NA	NA
GCA_013592195.1_ASM1359219v1	CP055627.1	92689	GCA_013592195.1_ASM1359219v1_bin_1	1488	49650	gplas	68793	0.742191630074766	0.016	1488	0.03	0.021	19428	0.391299093655589	no	0	0	no	no	NA	NA	NA	NA
GCA_013592195.1_ASM1359219v1	CP055627.1	92689	GCA_013592195.1_ASM1359219v1_bin_2	29011	45597	gplas	68793	0.742191630074766	0.313	29011	0.636	0.42	0	0	no	0	0	no	no	NA	NA	NA	NA
GCA_013592195.1_ASM1359219v1	CP055628.1	46125	not_detected	0	not_applicable	gplas	44079	0.955642276422764	NA	0	NA	NA	not_applicable	not_applicable	no	0	0	no	no	NA	NA	NA	NA
GCA_013592195.1_ASM1359219v1	CP055629.1	3125	GCA_013592195.1_ASM1359219v1_bin_3	3125	3202	gplas	3125	1	1	3125	0.976	0.988	0	0	yes	0	0	no	no	NA	NA	NA	NA
GCA_013592195.1_ASM1359219v1	CP055630.1	1348	not_detected	0	not_applicable	gplas	1048	0.777448071216617	NA	0	NA	NA	not_applicable	not_applicable	no	0	0	no	no	NA	NA	NA	NA
GCA_013601135.1_ASM1360113v1	CP055714.1	72254	GCA_013601135.1_ASM1360113v1_bin_2	13574	13574	gplas	68988	0.954798350264345	0.188	13574	1	0.316	0	0	no	0	0	no	no	NA	NA	NA	NA
GCA_013601135.1_ASM1360113v1	CP055715.1	37616	GCA_013601135.1_ASM1360113v1_bin_3	37616	37693	gplas	37616	1	1	37616	0.998	0.999	0	0	yes	0	0	no	no	NA	NA	NA	NA
GCA_013601135.1_ASM1360113v1	CP055716.1	6809	GCA_013601135.1_ASM1360113v1_bin_4	6809	6886	gplas	6809	1	1	6809	0.989	0.994	0	0	yes	0	0	no	no	NA	NA	NA	NA
GCA_013601135.1_ASM1360113v1	CP055717.1	1611	not_detected	0	not_applicable	gplas	0	0	NA	0	NA	NA	not_applicable	not_applicable	no	0	0	no	no	NA	NA	NA	NA
GCA_013602835.1_ASM1360283v1	CP055734.1	2848	not_detected	0	not_applicable	gplas	0	0	NA	0	NA	NA	not_applicable	not_applicable	no	0	0	no	no	NA	NA	NA	NA
GCA_013602835.1_ASM1360283v1	CP055735.1	2275	not_detected	0	not_applicable	gplas	1819	0.79956043956044	NA	0	NA	NA	not_applicable	not_applicable	no	0	0	no	no	NA	NA	NA	NA
GCA_013602835.1_ASM1360283v1	CP055725.1	92722	GCA_013602835.1_ASM1360283v1_bin_1	19307	58368	gplas	79230	0.85448976510429	0.208	19307	0.331	0.255	9608	0.164610745614035	no	0	0	no	no	NA	NA	NA	NA
GCA_013602835.1_ASM1360283v1	CP055726.1	55974	GCA_013602835.1_ASM1360283v1_bin_1	29387	58368	gplas	44037	0.786740272269268	0.525	29387	0.503	0.514	9608	0.164610745614035	no	0	0	no	no	NA	NA	NA	NA
GCA_013602835.1_ASM1360283v1	CP055727.1	6988	GCA_013602835.1_ASM1360283v1_bin_2	6832	6832	gplas	6832	0.977676016027476	0.978	6832	1	0.989	0	0	yes	0	0	no	no	NA	NA	NA	NA
GCA_013602835.1_ASM1360283v1	CP055728.1	6746	not_detected	0	not_applicable	gplas	6065	0.899051289653128	NA	0	NA	NA	not_applicable	not_applicable	no	0	0	no	no	NA	NA	NA	NA
GCA_013602835.1_ASM1360283v1	CP055729.1	4973	not_detected	0	not_applicable	gplas	4912	0.987733762316509	NA	0	NA	NA	not_applicable	not_applicable	no	0	0	no	no	NA	NA	NA	NA
GCA_013602835.1_ASM1360283v1	CP055730.1	4286	GCA_013602835.1_ASM1360283v1_bin_3	4129	4129	gplas	4129	0.963369108726085	0.963	4129	1	0.981	0	0	yes	0	0	no	no	NA	NA	NA	NA
GCA_013602835.1_ASM1360283v1	CP055731.1	3605	GCA_013602835.1_ASM1360283v1_bin_5	3605	3682	gplas	3605	1	1	3605	0.979	0.989	0	0	yes	0	0	no	no	NA	NA	NA	NA
GCA_013602835.1_ASM1360283v1	CP055732.1	3142	not_detected	0	not_applicable	gplas	3087	0.982495225970719	NA	0	NA	NA	not_applicable	not_applicable	no	0	0	no	no	NA	NA	NA	NA
GCA_013602835.1_ASM1360283v1	CP055733.1	3136	not_detected	0	not_applicable	gplas	3125	0.996492346938776	NA	0	NA	NA	not_applicable	not_applicable	no	0	0	no	no	NA	NA	NA	NA
GCA_013725775.1_ASM1372577v1	CP056243.1	108567	GCA_013725775.1_ASM1372577v1_bin_1	50163	50180	gplas	106902	0.984663848130647	0.462	50163	1	0.632	0	0	no	0	0	no	no	NA	NA	NA	NA
GCA_013727075.1_ASM1372707v1	CP056250.1	112626	not_detected	0	not_applicable	gplas	110030	0.976950260153073	NA	0	NA	NA	not_applicable	not_applicable	no	0	0	no	no	NA	NA	NA	NA
GCA_013727815.1_ASM1372781v1	CP056264.1	77336	GCA_013727815.1_ASM1372781v1_bin_2	18513	19688	gplas	70474	0.911270301024103	0.239	18513	0.94	0.381	0	0	no	2	1	yes	yes	2	2	2	1
GCA_013727815.1_ASM1372781v1	CP056264.1	77336	GCA_013727815.1_ASM1372781v1_bin_1	46495	55338	gplas	70474	0.911270301024103	0.601	46495	0.84	0.701	0	0	no	2	1	yes	yes	NA	NA	NA	NA
GCA_013727815.1_ASM1372781v1	CP056265.1	57094	GCA_013727815.1_ASM1372781v1_bin_3	6721	24458	gplas	43317	0.758696185238379	0.118	6721	0.275	0.165	17690	0.723280726142775	no	0	0	no	no	NA	NA	NA	NA
GCA_013727815.1_ASM1372781v1	CP056265.1	57094	GCA_013727815.1_ASM1372781v1_bin_2	1175	19688	gplas	43317	0.758696185238379	0.021	1175	0.06	0.031	0	0	no	0	0	no	no	NA	NA	NA	NA
GCA_013727815.1_ASM1372781v1	CP056265.1	57094	GCA_013727815.1_ASM1372781v1_bin_1	8843	55338	gplas	43317	0.758696185238379	0.155	8843	0.16	0.157	0	0	no	0	0	no	no	NA	NA	NA	NA
GCA_013727815.1_ASM1372781v1	CP056266.1	7939	GCA_013727815.1_ASM1372781v1_bin_5	7939	8016	gplas	7939	1	1	7939	0.99	0.995	0	0	yes	0	0	no	no	NA	NA	NA	NA
GCA_013728735.1_ASM1372873v1	CP056274.1	139002	GCA_013728735.1_ASM1372873v1_bin_1	21044	21044	gplas	122864	0.883900951065452	0.151	21044	1	0.262	0	0	no	0	0	no	no	NA	NA	NA	NA
GCA_013728735.1_ASM1372873v1	CP056274.1	139002	GCA_013728735.1_ASM1372873v1_bin_3	31907	65025	gplas	122864	0.883900951065452	0.23	31907	0.491	0.313	33118	0.509311803152634	no	0	0	no	no	NA	NA	NA	NA
GCA_013728735.1_ASM1372873v1	CP056274.1	139002	GCA_013728735.1_ASM1372873v1_bin_2	33396	33396	gplas	122864	0.883900951065452	0.24	33396	1	0.387	0	0	no	0	0	no	no	NA	NA	NA	NA
GCA_013729295.1_ASM1372929v1	CP056279.1	59864	GCA_013729295.1_ASM1372929v1_bin_1	44200	66954	gplas	54676	0.913336896966457	0.738	44200	0.66	0.697	0	0	no	0	0	no	no	NA	NA	NA	NA
GCA_013729295.1_ASM1372929v1	CP056280.1	52530	GCA_013729295.1_ASM1372929v1_bin_1	22686	66954	gplas	46651	0.888083000190367	0.432	22686	0.339	0.38	0	0	no	0	0	no	no	NA	NA	NA	NA
GCA_013729295.1_ASM1372929v1	CP056281.1	4074	GCA_013729295.1_ASM1372929v1_bin_3	4074	4151	gplas	4074	1	1	4074	0.981	0.99	0	0	yes	0	0	no	no	NA	NA	NA	NA
GCA_013729535.1_ASM1372953v1	CP056283.1	97488	GCA_013729535.1_ASM1372953v1_bin_1	87868	92495	gplas	93470	0.958784670933859	0.901	87868	0.95	0.925	4627	0.0500243256392237	no	0	0	no	no	NA	NA	NA	NA
GCA_013730915.1_ASM1373091v1	CP056300.1	110291	not_detected	0	not_applicable	gplas	110291	1	NA	0	NA	NA	not_applicable	not_applicable	no	0	0	no	no	NA	NA	NA	NA
GCA_013731515.1_ASM1373151v1	CP056305.1	131482	GCA_013731515.1_ASM1373151v1_bin_4	10260	10260	gplas	114167	0.868308970049132	0.078	10260	1	0.145	0	0	no	5	0	yes	no	5	5	5	1
GCA_013731515.1_ASM1373151v1	CP056305.1	131482	GCA_013731515.1_ASM1373151v1_bin_1	45635	55171	gplas	114167	0.868308970049132	0.347	45635	0.827	0.489	9536	0.172844429138497	no	5	0	yes	no	NA	NA	NA	NA
GCA_013731515.1_ASM1373151v1	CP056305.1	131482	GCA_013731515.1_ASM1373151v1_bin_2	14830	14960	gplas	114167	0.868308970049132	0.113	14830	0.991	0.203	0	0	no	5	0	yes	no	NA	NA	NA	NA
GCA_013731515.1_ASM1373151v1	CP056306.1	4074	not_detected	0	not_applicable	gplas	4074	1	NA	0	NA	NA	not_applicable	not_applicable	no	0	0	no	no	NA	NA	NA	NA
GCA_013732175.1_ASM1373217v1	CP056316.1	88905	GCA_013732175.1_ASM1373217v1_bin_2	35260	35260	gplas	81336	0.914864180867218	0.397	35260	1	0.568	0	0	no	6	0	yes	no	NA	NA	NA	NA
GCA_013732175.1_ASM1373217v1	CP056316.1	88905	GCA_013732175.1_ASM1373217v1_bin_3	21040	21096	gplas	81336	0.914864180867218	0.237	21040	0.997	0.383	0	0	no	6	0	yes	no	NA	NA	NA	NA
GCA_013732175.1_ASM1373217v1	CP056316.1	88905	GCA_013732175.1_ASM1373217v1_bin_4	13065	13065	gplas	81336	0.914864180867218	0.147	13065	1	0.256	0	0	no	6	0	yes	no	2	2	6	0.333333333333333
GCA_013732175.1_ASM1373217v1	CP056317.1	55918	GCA_013732175.1_ASM1373217v1_bin_1	30696	30727	gplas	50072	0.895454057727387	0.549	30696	0.999	0.709	0	0	no	8	0	yes	no	4	4	8	0.5
GCA_013732175.1_ASM1373217v1	CP056318.1	5716	not_detected	0	not_applicable	gplas	5716	1	NA	0	NA	NA	not_applicable	not_applicable	no	0	0	no	no	NA	NA	NA	NA
GCA_013732175.1_ASM1373217v1	CP056319.1	5444	GCA_013732175.1_ASM1373217v1_bin_5	5444	5521	gplas	5444	1	1	5444	0.986	0.993	0	0	yes	0	0	no	no	NA	NA	NA	NA
GCA_013732175.1_ASM1373217v1	CP056320.1	4084	GCA_013732175.1_ASM1373217v1_bin_6	4084	4161	gplas	4084	1	1	4084	0.981	0.99	0	0	yes	0	0	no	no	NA	NA	NA	NA
GCA_013735655.1_ASM1373565v1	CP056413.1	187726	GCA_013735655.1_ASM1373565v1_bin_2	9287	17679	gplas	155531	0.828500047942214	0.049	9287	0.525	0.09	8392	0.474687482323661	no	0	0	no	no	NA	NA	NA	NA
GCA_013735655.1_ASM1373565v1	CP056413.1	187726	GCA_013735655.1_ASM1373565v1_bin_3	37093	57612	gplas	155531	0.828500047942214	0.198	37093	0.644	0.303	20470	0.355307921960703	no	0	0	no	no	NA	NA	NA	NA
GCA_013735655.1_ASM1373565v1	CP056413.1	187726	GCA_013735655.1_ASM1373565v1_bin_4	19050	54353	gplas	155531	0.828500047942214	0.101	19050	0.35	0.157	35303	0.649513366327526	no	0	0	no	no	NA	NA	NA	NA
GCA_013735655.1_ASM1373565v1	CP056414.1	13243	GCA_013735655.1_ASM1373565v1_bin_5	13243	13320	gplas	13243	1	1	13243	0.994	0.997	0	0	yes	0	0	no	no	NA	NA	NA	NA
GCA_013735655.1_ASM1373565v1	CP056415.1	4566	not_detected	0	not_applicable	gplas	4535	0.993210687691634	NA	0	NA	NA	not_applicable	not_applicable	no	0	0	no	no	NA	NA	NA	NA
GCA_013735655.1_ASM1373565v1	CP056416.1	4161	GCA_013735655.1_ASM1373565v1_bin_6	4161	4238	gplas	4161	1	1	4161	0.982	0.991	0	0	yes	0	0	no	no	NA	NA	NA	NA
GCA_013735655.1_ASM1373565v1	CP056417.1	2353	GCA_013735655.1_ASM1373565v1_bin_7	2353	2430	gplas	2353	1	1	2353	0.968	0.984	0	0	yes	0	0	no	no	NA	NA	NA	NA
GCA_013739975.1_ASM1373997v1	CP056405.1	68855	GCA_013739975.1_ASM1373997v1_bin_1	67677	67677	gplas	67677	0.98289158376298	0.983	67677	1	0.991	0	0	yes	0	0	no	no	NA	NA	NA	NA
GCA_013739975.1_ASM1373997v1	CP056406.1	7461	GCA_013739975.1_ASM1373997v1_bin_2	7461	7538	gplas	7461	1	1	7461	0.99	0.995	0	0	yes	0	0	no	no	NA	NA	NA	NA
GCA_013739975.1_ASM1373997v1	CP056407.1	2524	not_detected	0	not_applicable	gplas	2524	1	NA	0	NA	NA	not_applicable	not_applicable	no	0	0	no	no	NA	NA	NA	NA
GCA_013739975.1_ASM1373997v1	CP056408.1	2089	not_detected	0	not_applicable	gplas	0	0	NA	0	NA	NA	not_applicable	not_applicable	no	0	0	no	no	NA	NA	NA	NA
GCA_013740395.1_ASM1374039v1	CP056447.1	93941	GCA_013740395.1_ASM1374039v1_bin_1	89324	95064	gplas	90893	0.967554103107269	0.951	89324	0.94	0.945	5740	0.0603803753260961	no	1	1	yes	yes	1	2	1	1
GCA_013740395.1_ASM1374039v1	CP056448.1	57093	GCA_013740395.1_ASM1374039v1_bin_4	23844	23844	gplas	46261	0.81027446447025	0.418	23844	1	0.59	0	0	no	0	0	no	no	NA	NA	NA	NA
GCA_013740395.1_ASM1374039v1	CP056449.1	6200	not_detected	0	not_applicable	gplas	5957	0.960806451612903	NA	0	NA	NA	not_applicable	not_applicable	no	3	0	yes	no	NA	NA	3	NA
GCA_013740395.1_ASM1374039v1	CP056450.1	4197	GCA_013740395.1_ASM1374039v1_bin_5	3865	4274	gplas	3865	0.920895878008101	0.921	3865	0.904	0.912	0	0	no	0	0	no	no	NA	NA	NA	NA
GCA_013741635.1_ASM1374163v1	CP056599.1	124230	GCA_013741635.1_ASM1374163v1_bin_1	95565	188644	gplas	104064	0.837672059888916	0.769	95565	0.507	0.611	8866	0.0469985793346197	no	3	0	yes	no	1	2	3	0.333333333333333
GCA_013741635.1_ASM1374163v1	CP056600.1	93526	GCA_013741635.1_ASM1374163v1_bin_1	83951	188644	gplas	85672	0.916023351795223	0.898	83951	0.445	0.595	8866	0.0469985793346197	no	3	0	yes	no	1	2	3	0.333333333333333
GCA_013741635.1_ASM1374163v1	CP056601.1	7939	GCA_013741635.1_ASM1374163v1_bin_2	7939	8016	gplas	7939	1	1	7939	0.99	0.995	0	0	yes	0	0	no	no	NA	NA	NA	NA
GCA_013741635.1_ASM1374163v1	CP056602.1	4072	not_detected	0	not_applicable	gplas	4072	1	NA	0	NA	NA	not_applicable	not_applicable	no	0	0	no	no	NA	NA	NA	NA
GCA_013741635.1_ASM1374163v1	CP056603.1	1552	not_detected	0	not_applicable	gplas	0	0	NA	0	NA	NA	not_applicable	not_applicable	no	0	0	no	no	NA	NA	NA	NA
GCA_013741855.1_ASM1374185v1	CP056609.1	146435	GCA_013741855.1_ASM1374185v1_bin_2	39658	65670	gplas	104435	0.713183323658961	0.271	39658	0.604	0.374	25960	0.395309882747069	no	0	0	no	no	NA	NA	NA	NA
GCA_013741855.1_ASM1374185v1	CP056610.1	97721	GCA_013741855.1_ASM1374185v1_bin_1	81863	81967	gplas	84687	0.86662027609214	0.838	81863	0.999	0.911	0	0	no	0	0	no	no	NA	NA	NA	NA
GCA_013741855.1_ASM1374185v1	CP056611.1	4072	GCA_013741855.1_ASM1374185v1_bin_3	4043	4149	gplas	4043	0.992878192534381	0.993	4043	0.974	0.983	0	0	yes	0	0	no	no	NA	NA	NA	NA
GCA_013741855.1_ASM1374185v1	CP056612.1	1565	GCA_013741855.1_ASM1374185v1_bin_4	1565	1642	gplas	1565	1	1	1565	0.953	0.976	0	0	yes	0	0	no	no	NA	NA	NA	NA
GCA_013742135.1_ASM1374213v1	CP056614.1	146436	GCA_013742135.1_ASM1374213v1_bin_1	49157	157118	gplas	106797	0.72930836679505	0.336	49157	0.313	0.324	25891	0.16478697539429	no	0	0	no	no	NA	NA	NA	NA
GCA_013742135.1_ASM1374213v1	CP056615.1	97721	GCA_013742135.1_ASM1374213v1_bin_1	81863	157118	gplas	84687	0.86662027609214	0.838	81863	0.521	0.643	25891	0.16478697539429	no	0	0	no	no	NA	NA	NA	NA
GCA_013742135.1_ASM1374213v1	CP056616.1	4072	not_detected	0	not_applicable	gplas	4072	1	NA	0	NA	NA	not_applicable	not_applicable	no	0	0	no	no	NA	NA	NA	NA
GCA_013742135.1_ASM1374213v1	CP056617.1	1565	GCA_013742135.1_ASM1374213v1_bin_2	1565	1642	gplas	1565	1	1	1565	0.953	0.976	0	0	yes	0	0	no	no	NA	NA	NA	NA
GCA_013742835.1_ASM1374283v1	CP056626.1	153071	GCA_013742835.1_ASM1374283v1_bin_3	16481	51473	gplas	118070	0.771341403662353	0.108	16481	0.32	0.161	15123	0.293804518873973	no	0	0	no	no	NA	NA	NA	NA
GCA_013742835.1_ASM1374283v1	CP056626.1	153071	GCA_013742835.1_ASM1374283v1_bin_2	10205	36973	gplas	118070	0.771341403662353	0.067	10205	0.276	0.108	8551	0.231276877721581	no	0	0	no	no	NA	NA	NA	NA
GCA_013742835.1_ASM1374283v1	CP056626.1	153071	GCA_013742835.1_ASM1374283v1_bin_1	34991	152709	gplas	118070	0.771341403662353	0.229	34991	0.229	0.229	89861	0.588445998598642	no	0	0	no	no	NA	NA	NA	NA
GCA_013742835.1_ASM1374283v1	CP056627.1	128439	GCA_013742835.1_ASM1374283v1_bin_3	19869	51473	gplas	104306	0.812105357407018	0.155	19869	0.386	0.221	15123	0.293804518873973	no	0	0	no	no	NA	NA	NA	NA
GCA_013742835.1_ASM1374283v1	CP056627.1	128439	GCA_013742835.1_ASM1374283v1_bin_2	18217	36973	gplas	104306	0.812105357407018	0.142	18217	0.493	0.22	8551	0.231276877721581	no	0	0	no	no	NA	NA	NA	NA
GCA_013742835.1_ASM1374283v1	CP056627.1	128439	GCA_013742835.1_ASM1374283v1_bin_1	27857	152709	gplas	104306	0.812105357407018	0.217	27857	0.182	0.198	89861	0.588445998598642	no	0	0	no	no	NA	NA	NA	NA
GCA_013742835.1_ASM1374283v1	CP056628.1	4075	GCA_013742835.1_ASM1374283v1_bin_4	4075	4137	gplas	4075	1	1	4075	0.985	0.992	0	0	yes	0	0	no	no	NA	NA	NA	NA
GCA_013742835.1_ASM1374283v1	CP056629.1	4018	GCA_013742835.1_ASM1374283v1_bin_5	3959	3959	gplas	3959	0.985316077650572	0.985	3959	1	0.992	0	0	yes	0	0	no	no	NA	NA	NA	NA
GCA_013742835.1_ASM1374283v1	CP056630.1	1917	not_detected	0	not_applicable	gplas	1917	1	NA	0	NA	NA	not_applicable	not_applicable	no	0	0	no	no	NA	NA	NA	NA
GCA_013742835.1_ASM1374283v1	CP056631.1	1610	GCA_013742835.1_ASM1374283v1_bin_6	1610	1687	gplas	1610	1	1	1610	0.954	0.976	0	0	yes	0	0	no	no	NA	NA	NA	NA
GCA_013744185.1_ASM1374418v1	CP056656.1	116506	GCA_013744185.1_ASM1374418v1_bin_1	57993	75076	gplas	112073	0.961950457487168	0.498	57993	0.772	0.605	17083	0.227542756673238	no	0	0	no	no	NA	NA	NA	NA
GCA_013744185.1_ASM1374418v1	CP056657.1	4401	not_detected	0	not_applicable	gplas	4389	0.997273346966599	NA	0	NA	NA	not_applicable	not_applicable	no	0	0	no	no	NA	NA	NA	NA
GCA_013744185.1_ASM1374418v1	CP056658.1	4315	not_detected	0	not_applicable	gplas	4315	1	NA	0	NA	NA	not_applicable	not_applicable	no	0	0	no	no	NA	NA	NA	NA
GCA_013744185.1_ASM1374418v1	CP056659.1	4161	GCA_013744185.1_ASM1374418v1_bin_3	4161	4238	gplas	4161	1	1	4161	0.982	0.991	0	0	yes	0	0	no	no	NA	NA	NA	NA
GCA_013744185.1_ASM1374418v1	CP056660.1	3675	GCA_013744185.1_ASM1374418v1_bin_4	3496	3752	gplas	3496	0.951292517006803	0.951	3496	0.932	0.941	0	0	no	0	0	no	no	NA	NA	NA	NA
GCA_013744185.1_ASM1374418v1	CP056661.1	2865	not_detected	0	not_applicable	gplas	2865	1	NA	0	NA	NA	not_applicable	not_applicable	no	0	0	no	no	NA	NA	NA	NA
GCA_013745955.1_ASM1374595v1	CP056358.1	119656	GCA_013745955.1_ASM1374595v1_bin_3	8926	8926	gplas	112142	0.937203316173029	0.075	8926	1	0.14	0	0	no	0	0	no	no	NA	NA	NA	NA
GCA_013745955.1_ASM1374595v1	CP056358.1	119656	GCA_013745955.1_ASM1374595v1_bin_1	41780	41780	gplas	112142	0.937203316173029	0.349	41780	1	0.517	0	0	no	0	0	no	no	NA	NA	NA	NA
GCA_013745955.1_ASM1374595v1	CP056359.1	4116	not_detected	0	not_applicable	gplas	4113	0.999271137026239	NA	0	NA	NA	not_applicable	not_applicable	no	0	0	no	no	NA	NA	NA	NA
GCA_013745955.1_ASM1374595v1	CP056360.1	4073	GCA_013745955.1_ASM1374595v1_bin_5	4073	4150	gplas	4073	1	1	4073	0.981	0.99	0	0	yes	0	0	no	no	NA	NA	NA	NA
GCA_013746875.1_ASM1374687v1	CP056397.1	7536	not_detected	0	not_applicable	gplas	6427	0.852839702760085	NA	0	NA	NA	not_applicable	not_applicable	no	0	0	no	no	NA	NA	NA	NA
GCA_013746875.1_ASM1374687v1	CP056398.1	2292	not_detected	0	not_applicable	gplas	0	0	NA	0	NA	NA	not_applicable	not_applicable	no	0	0	no	no	NA	NA	NA	NA
GCA_013748455.1_ASM1374845v1	CP056471.1	109013	GCA_013748455.1_ASM1374845v1_bin_2	22373	26032	gplas	69997	0.64209773146322	0.205	22373	0.859	0.331	0	0	no	4	0	yes	no	NA	NA	NA	NA
GCA_013748455.1_ASM1374845v1	CP056471.1	109013	GCA_013748455.1_ASM1374845v1_bin_3	20044	26494	gplas	69997	0.64209773146322	0.184	20044	0.757	0.296	6450	0.2434513474749	no	4	0	yes	no	4	7	4	1
GCA_013748455.1_ASM1374845v1	CP056472.1	72712	GCA_013748455.1_ASM1374845v1_bin_1	29330	29372	gplas	44211	0.608028936076576	0.403	29330	0.999	0.574	0	0	no	0	0	no	no	NA	NA	NA	NA
GCA_013748455.1_ASM1374845v1	CP056472.1	72712	GCA_013748455.1_ASM1374845v1_bin_2	3659	26032	gplas	44211	0.608028936076576	0.05	3659	0.141	0.074	0	0	no	0	0	no	no	NA	NA	NA	NA
GCA_013748665.1_ASM1374866v1	CP056493.1	77183	GCA_013748665.1_ASM1374866v1_bin_4	17313	22617	gplas	46395	0.601103870023192	0.224	17313	0.765	0.347	5304	0.234513861254808	no	4	0	yes	no	4	7	4	1
GCA_013748665.1_ASM1374866v1	CP056493.1	77183	GCA_013748665.1_ASM1374866v1_bin_2	14367	22981	gplas	46395	0.601103870023192	0.186	14367	0.625	0.287	0	0	no	4	0	yes	no	NA	NA	NA	NA
GCA_013748665.1_ASM1374866v1	CP056493.1	77183	GCA_013748665.1_ASM1374866v1_bin_1	4783	32063	gplas	46395	0.601103870023192	0.062	4783	0.149	0.088	0	0	no	4	0	yes	no	NA	NA	NA	NA
GCA_013748665.1_ASM1374866v1	CP056494.1	74158	GCA_013748665.1_ASM1374866v1_bin_2	8614	22981	gplas	49548	0.668140996251247	0.116	8614	0.375	0.177	0	0	no	0	0	no	no	NA	NA	NA	NA
GCA_013748665.1_ASM1374866v1	CP056494.1	74158	GCA_013748665.1_ASM1374866v1_bin_1	27280	32063	gplas	49548	0.668140996251247	0.368	27280	0.851	0.514	0	0	no	0	0	no	no	NA	NA	NA	NA
GCA_013749295.1_ASM1374929v1	CP056525.1	132310	GCA_013749295.1_ASM1374929v1_bin_2	18039	20376	gplas	114325	0.864069231350616	0.136	18039	0.885	0.236	2337	0.114693757361602	no	5	0	yes	no	4	6	5	0.8
GCA_013749295.1_ASM1374929v1	CP056525.1	132310	GCA_013749295.1_ASM1374929v1_bin_1	35614	35614	gplas	114325	0.864069231350616	0.269	35614	1	0.424	0	0	no	5	0	yes	no	NA	NA	NA	NA
GCA_013749295.1_ASM1374929v1	CP056525.1	132310	GCA_013749295.1_ASM1374929v1_bin_3	6193	6193	gplas	114325	0.864069231350616	0.047	6193	1	0.09	0	0	no	5	0	yes	no	NA	NA	NA	NA
GCA_013749295.1_ASM1374929v1	CP056526.1	4074	not_detected	0	not_applicable	gplas	4074	1	NA	0	NA	NA	not_applicable	not_applicable	no	0	0	no	no	NA	NA	NA	NA
GCA_013749975.1_ASM1374997v1	CP056557.1	107875	GCA_013749975.1_ASM1374997v1_bin_1	64656	109801	gplas	80085	0.742387022016223	0.599	64656	0.589	0.594	0	0	no	0	0	no	no	NA	NA	NA	NA
GCA_013749975.1_ASM1374997v1	CP056558.1	75959	GCA_013749975.1_ASM1374997v1_bin_1	45087	109801	gplas	63981	0.842309667057228	0.594	45087	0.411	0.486	0	0	no	0	0	no	no	NA	NA	NA	NA
GCA_013750375.1_ASM1375037v1	CP056566.1	13429	not_detected	0	not_applicable	gplas	12812	0.954054657830069	NA	0	NA	NA	not_applicable	not_applicable	no	0	0	no	no	NA	NA	NA	NA
GCA_013750815.1_ASM1375081v1	CP056570.1	114257	GCA_013750815.1_ASM1375081v1_bin_1	47417	70886	gplas	76392	0.668597985243793	0.415	47417	0.669	0.512	0	0	no	0	0	no	no	NA	NA	NA	NA
GCA_013750815.1_ASM1375081v1	CP056571.1	78143	GCA_013750815.1_ASM1375081v1_bin_1	22419	70886	gplas	42250	0.540675428381301	0.287	22419	0.316	0.301	0	0	no	1	0	yes	no	1	1	1	1
GCA_013750815.1_ASM1375081v1	CP056572.1	39529	GCA_013750815.1_ASM1375081v1_bin_2	14652	14699	gplas	39529	1	0.371	14652	0.997	0.541	0	0	no	0	0	no	no	NA	NA	NA	NA
GCA_013751495.1_ASM1375149v1	CP056585.1	149874	GCA_013751495.1_ASM1375149v1_bin_1	94228	96086	gplas	141245	0.942424970308392	0.629	94228	0.981	0.767	1824	0.0189829944008492	no	0	0	no	no	NA	NA	NA	NA
GCA_013752075.1_ASM1375207v1	CP056605.1	118906	GCA_013752075.1_ASM1375207v1_bin_3	95307	95349	gplas	104238	0.876642053386709	0.802	95307	1	0.89	0	0	no	0	0	no	no	NA	NA	NA	NA
GCA_013752075.1_ASM1375207v1	CP056606.1	108784	GCA_013752075.1_ASM1375207v1_bin_2	71134	71134	gplas	91030	0.836795852331225	0.654	71134	1	0.791	0	0	no	5	1	yes	yes	3	3	5	0.6
GCA_013752075.1_ASM1375207v1	CP056607.1	87886	GCA_013752075.1_ASM1375207v1_bin_1	67801	67801	gplas	73487	0.836162756297931	0.771	67801	1	0.871	0	0	no	0	0	no	no	NA	NA	NA	NA
GCA_013752295.1_ASM1375229v1	CP056619.1	110691	not_detected	0	not_applicable	gplas	109459	0.98886991715677	NA	0	NA	NA	not_applicable	not_applicable	no	1	0	yes	no	NA	NA	1	NA
GCA_013783465.1_ASM1378346v1	CP056349.1	83612	not_detected	0	not_applicable	gplas	83612	1	NA	0	NA	NA	not_applicable	not_applicable	no	0	0	no	no	NA	NA	NA	NA
GCA_013783685.1_ASM1378368v1	CP056356.1	146879	GCA_013783685.1_ASM1378368v1_bin_1	82592	82648	gplas	135488	0.922446367418079	0.562	82592	0.999	0.719	0	0	no	0	0	no	no	NA	NA	NA	NA
GCA_013783905.1_ASM1378390v1	CP056371.1	118132	GCA_013783905.1_ASM1378390v1_bin_1	105835	105835	gplas	110721	0.937265093285477	0.896	105835	1	0.945	0	0	no	3	0	yes	no	3	3	3	1
GCA_013785265.1_ASM1378526v1	CP056482.1	1887	not_detected	0	not_applicable	gplas	1887	1	NA	0	NA	NA	not_applicable	not_applicable	no	0	0	no	no	NA	NA	NA	NA
GCA_013786125.1_ASM1378612v1	CP056621.1	96659	GCA_013786125.1_ASM1378612v1_bin_1	95945	96021	gplas	95945	0.992613207254368	0.993	95945	0.999	0.996	0	0	yes	0	0	no	no	NA	NA	NA	NA
GCA_013786165.1_ASM1378616v1	CP056633.1	7462	not_detected	0	not_applicable	gplas	7462	1	NA	0	NA	NA	not_applicable	not_applicable	no	0	0	no	no	NA	NA	NA	NA
GCA_013786165.1_ASM1378616v1	CP056634.1	4072	not_detected	0	not_applicable	gplas	4072	1	NA	0	NA	NA	not_applicable	not_applicable	no	0	0	no	no	NA	NA	NA	NA
GCA_013789905.1_ASM1378990v1	CP056787.1	167752	GCA_013789905.1_ASM1378990v1_bin_2	72780	77894	gplas	151375	0.902373742190853	0.434	72780	0.934	0.593	5113	0.0656404857883791	no	8	1	yes	yes	NA	NA	NA	NA
GCA_013789905.1_ASM1378990v1	CP056787.1	167752	GCA_013789905.1_ASM1378990v1_bin_4	47736	47736	gplas	151375	0.902373742190853	0.285	47736	1	0.444	0	0	no	8	1	yes	yes	7	7	8	0.875
GCA_013789905.1_ASM1378990v1	CP056787.1	167752	GCA_013789905.1_ASM1378990v1_bin_3	7715	15532	gplas	151375	0.902373742190853	0.046	7715	0.497	0.084	7817	0.503283543651816	no	8	1	yes	yes	NA	NA	NA	NA
GCA_013789905.1_ASM1378990v1	CP056788.1	111310	GCA_013789905.1_ASM1378990v1_bin_1	50065	50065	gplas	108931	0.978627257209595	0.45	50065	1	0.621	0	0	no	0	0	no	no	NA	NA	NA	NA
GCA_013789905.1_ASM1378990v1	CP056789.1	12602	GCA_013789905.1_ASM1378990v1_bin_5	9744	12946	gplas	10805	0.857403586732265	0.773	9744	0.753	0.763	0	0	no	0	0	no	no	NA	NA	NA	NA
GCA_013789905.1_ASM1378990v1	CP056790.1	3133	not_detected	0	not_applicable	gplas	0	0	NA	0	NA	NA	not_applicable	not_applicable	no	0	0	no	no	NA	NA	NA	NA
GCA_013789905.1_ASM1378990v1	CP056791.1	2088	GCA_013789905.1_ASM1378990v1_bin_6	2088	2165	gplas	2088	1	1	2088	0.964	0.982	0	0	yes	0	0	no	no	NA	NA	NA	NA
GCA_013789905.1_ASM1378990v1	CP056792.1	1976	not_detected	0	not_applicable	gplas	1976	1	NA	0	NA	NA	not_applicable	not_applicable	no	0	0	no	no	NA	NA	NA	NA
GCA_013789905.1_ASM1378990v1	CP056793.1	1551	GCA_013789905.1_ASM1378990v1_bin_7	1551	1628	gplas	1551	1	1	1551	0.953	0.976	0	0	yes	0	0	no	no	NA	NA	NA	NA
GCA_013790145.1_ASM1379014v1	CP056795.1	201308	not_detected	0	not_applicable	gplas	200313	0.995057325093886	NA	0	NA	NA	not_applicable	not_applicable	no	0	0	no	no	NA	NA	NA	NA
GCA_013790145.1_ASM1379014v1	CP056796.1	93185	GCA_013790145.1_ASM1379014v1_bin_2	5343	9676	gplas	88303	0.947609593818748	0.057	5343	0.552	0.103	4333	0.447809011988425	no	0	0	no	no	NA	NA	NA	NA
GCA_013790145.1_ASM1379014v1	CP056797.1	92191	GCA_013790145.1_ASM1379014v1_bin_4	56033	56033	gplas	82685	0.89688798255795	0.608	56033	1	0.756	0	0	no	2	1	yes	yes	1	1	2	0.5
GCA_013790145.1_ASM1379014v1	CP056798.1	69063	GCA_013790145.1_ASM1379014v1_bin_5	57975	57975	gplas	61097	0.884656038689313	0.839	57975	1	0.912	0	0	no	0	0	no	no	NA	NA	NA	NA
GCA_013790145.1_ASM1379014v1	CP056799.1	41391	GCA_013790145.1_ASM1379014v1_bin_6	41391	41468	gplas	41391	1	1	41391	0.998	0.999	0	0	yes	0	0	no	no	NA	NA	NA	NA
GCA_013790245.1_ASM1379024v1	CP056801.1	114414	GCA_013790245.1_ASM1379024v1_bin_1	109653	139908	gplas	112740	0.985368923383502	0.958	109653	0.784	0.862	4664	0.0333361923549761	no	1	1	yes	yes	1	1	1	1
GCA_013790245.1_ASM1379024v1	CP056802.1	79649	GCA_013790245.1_ASM1379024v1_bin_2	17832	49286	gplas	79275	0.995304398046429	0.224	17832	0.362	0.277	0	0	no	0	0	no	no	NA	NA	NA	NA
GCA_013790245.1_ASM1379024v1	CP056803.1	76107	GCA_013790245.1_ASM1379024v1_bin_2	31257	49286	gplas	67723	0.889839305188747	0.411	31257	0.634	0.499	0	0	no	2	0	yes	no	2	2	2	1
GCA_013790245.1_ASM1379024v1	CP056803.1	76107	GCA_013790245.1_ASM1379024v1_bin_1	25404	139908	gplas	67723	0.889839305188747	0.334	25404	0.182	0.236	4664	0.0333361923549761	no	2	0	yes	no	NA	NA	NA	NA
GCA_013790245.1_ASM1379024v1	CP056804.1	5210	GCA_013790245.1_ASM1379024v1_bin_5	5210	5287	gplas	5210	1	1	5210	0.985	0.992	0	0	yes	0	0	no	no	NA	NA	NA	NA
GCA_013790245.1_ASM1379024v1	CP056805.1	5165	not_detected	0	not_applicable	gplas	4193	0.811810261374637	NA	0	NA	NA	not_applicable	not_applicable	no	0	0	no	no	NA	NA	NA	NA
GCA_013790245.1_ASM1379024v1	CP056806.1	1976	not_detected	0	not_applicable	gplas	1976	1	NA	0	NA	NA	not_applicable	not_applicable	no	0	0	no	no	NA	NA	NA	NA
GCA_013790245.1_ASM1379024v1	CP056807.1	1549	GCA_013790245.1_ASM1379024v1_bin_3	1549	1592	gplas	1549	1	1	1549	0.973	0.986	0	0	yes	0	0	no	no	NA	NA	NA	NA
GCA_013790245.1_ASM1379024v1	CP056808.1	1506	GCA_013790245.1_ASM1379024v1_bin_4	1506	1549	gplas	1506	1	1	1506	0.972	0.986	0	0	yes	0	0	no	no	NA	NA	NA	NA
GCA_013790285.1_ASM1379028v1	CP056811.1	133729	GCA_013790285.1_ASM1379028v1_bin_1	49509	49509	gplas	129883	0.971240344278354	0.37	49509	1	0.54	0	0	no	0	0	no	no	NA	NA	NA	NA
GCA_013790285.1_ASM1379028v1	CP056812.1	36596	GCA_013790285.1_ASM1379028v1_bin_2	36596	36673	gplas	36596	1	1	36596	0.998	0.999	0	0	yes	0	0	no	no	NA	NA	NA	NA
GCA_013790285.1_ASM1379028v1	CP056813.1	3792	GCA_013790285.1_ASM1379028v1_bin_3	3792	3869	gplas	3792	1	1	3792	0.98	0.99	0	0	yes	0	0	no	no	NA	NA	NA	NA
GCA_013790285.1_ASM1379028v1	CP056814.1	2150	not_detected	0	not_applicable	gplas	2140	0.995348837209302	NA	0	NA	NA	not_applicable	not_applicable	no	0	0	no	no	NA	NA	NA	NA
GCA_013790285.1_ASM1379028v1	CP056815.1	1474	not_detected	0	not_applicable	gplas	0	0	NA	0	NA	NA	not_applicable	not_applicable	no	0	0	no	no	NA	NA	NA	NA
GCA_013790405.1_ASM1379040v1	CP056817.1	85970	GCA_013790405.1_ASM1379040v1_bin_2	12495	150370	gplas	67818	0.788856577876003	0.145	12495	0.083	0.106	76140	0.506351000864534	no	0	0	no	no	NA	NA	NA	NA
GCA_013790405.1_ASM1379040v1	CP056818.1	84644	GCA_013790405.1_ASM1379040v1_bin_1	62019	62079	gplas	66652	0.787439156939653	0.733	62019	0.999	0.846	0	0	no	0	0	no	no	NA	NA	NA	NA
GCA_013790405.1_ASM1379040v1	CP056819.1	77307	GCA_013790405.1_ASM1379040v1_bin_2	61735	150370	gplas	68724	0.888975125150374	0.799	61735	0.411	0.543	76140	0.506351000864534	no	1	0	yes	no	1	1	1	1
GCA_013790405.1_ASM1379040v1	CP056819.1	77307	GCA_013790405.1_ASM1379040v1_bin_1	4085	62079	gplas	68724	0.888975125150374	0.053	4085	0.066	0.059	0	0	no	1	0	yes	no	NA	NA	NA	NA
GCA_013790405.1_ASM1379040v1	CP056820.1	36067	GCA_013790405.1_ASM1379040v1_bin_4	36067	36144	gplas	36067	1	1	36067	0.998	0.999	0	0	yes	0	0	no	no	NA	NA	NA	NA
GCA_013791815.1_ASM1379181v1	CP056847.1	151959	GCA_013791815.1_ASM1379181v1_bin_1	119416	119481	gplas	146502	0.964088997690166	0.786	119416	0.999	0.88	0	0	no	9	0	yes	no	9	9	9	1
GCA_013791815.1_ASM1379181v1	CP056848.1	4263	GCA_013791815.1_ASM1379181v1_bin_2	4263	4340	gplas	4263	1	1	4263	0.982	0.991	0	0	yes	0	0	no	no	NA	NA	NA	NA
GCA_013791815.1_ASM1379181v1	CP056849.1	4195	not_detected	0	not_applicable	gplas	3871	0.922765196662694	NA	0	NA	NA	not_applicable	not_applicable	no	0	0	no	no	NA	NA	NA	NA
GCA_013791985.1_ASM1379198v1	CP056843.1	111550	GCA_013791985.1_ASM1379198v1_bin_1	52256	97277	gplas	93190	0.835410129986553	0.468	52256	0.537	0.5	3567	0.0366684827862701	no	10	0	yes	no	NA	NA	NA	NA
GCA_013791985.1_ASM1379198v1	CP056844.1	87144	GCA_013791985.1_ASM1379198v1_bin_1	41434	97277	gplas	78279	0.898271825943266	0.475	41434	0.426	0.449	3567	0.0366684827862701	no	0	0	no	no	NA	NA	NA	NA
GCA_013791985.1_ASM1379198v1	CP056845.1	46419	not_detected	0	not_applicable	gplas	45874	0.988259118033564	NA	0	NA	NA	not_applicable	not_applicable	no	0	0	no	no	NA	NA	NA	NA
GCA_013795065.1_ASM1379506v1	CP056866.1	44310	not_detected	0	not_applicable	gplas	42971	0.969781087790566	NA	0	NA	NA	not_applicable	not_applicable	no	2	1	yes	yes	NA	NA	2	NA
GCA_013795285.1_ASM1379528v1	CP056868.1	151919	GCA_013795285.1_ASM1379528v1_bin_1	88547	96378	gplas	136675	0.899657054088034	0.583	88547	0.919	0.713	7831	0.0812529830459233	no	0	0	no	no	NA	NA	NA	NA
GCA_013795285.1_ASM1379528v1	CP056869.1	2181	GCA_013795285.1_ASM1379528v1_bin_2	2113	2258	gplas	2113	0.968821641448877	0.969	2113	0.936	0.952	0	0	yes	0	0	no	no	NA	NA	NA	NA
GCA_013795545.1_ASM1379554v1	CP056871.1	92934	GCA_013795545.1_ASM1379554v1_bin_1	22373	22373	gplas	55695	0.599296274775647	0.241	22373	1	0.388	0	0	no	4	0	yes	no	NA	NA	NA	NA
GCA_013795545.1_ASM1379554v1	CP056871.1	92934	GCA_013795545.1_ASM1379554v1_bin_3	17313	23761	gplas	55695	0.599296274775647	0.186	17313	0.729	0.296	6448	0.271369050124153	no	4	0	yes	no	4	7	4	1
GCA_013795545.1_ASM1379554v1	CP056872.1	72712	GCA_013795545.1_ASM1379554v1_bin_2	27247	27247	gplas	43170	0.593712179557707	0.375	27247	1	0.545	0	0	no	0	0	no	no	NA	NA	NA	NA
GCA_013795795.1_ASM1379579v1	CP056874.1	92934	GCA_013795795.1_ASM1379579v1_bin_3	15458	19150	gplas	55938	0.601911033636774	0.166	15458	0.807	0.275	0	0	no	4	0	yes	no	NA	NA	NA	NA
GCA_013795795.1_ASM1379579v1	CP056874.1	92934	GCA_013795795.1_ASM1379579v1_bin_2	14395	19699	gplas	55938	0.601911033636774	0.155	14395	0.731	0.256	5304	0.269252246306919	no	4	0	yes	no	4	7	4	1
GCA_013795795.1_ASM1379579v1	CP056874.1	92934	GCA_013795795.1_ASM1379579v1_bin_1	6610	10701	gplas	55938	0.601911033636774	0.071	6610	0.618	0.127	4091	0.38230071955892	no	4	0	yes	no	NA	NA	NA	NA
GCA_013795795.1_ASM1379579v1	CP056875.1	75466	GCA_013795795.1_ASM1379579v1_bin_4	27247	27247	gplas	46541	0.616714811968304	0.361	27247	1	0.53	0	0	no	0	0	no	no	NA	NA	NA	NA
GCA_013795795.1_ASM1379579v1	CP056875.1	75466	GCA_013795795.1_ASM1379579v1_bin_3	3692	19150	gplas	46541	0.616714811968304	0.049	3692	0.193	0.078	0	0	no	0	0	no	no	NA	NA	NA	NA
GCA_013796065.1_ASM1379606v1	CP056877.1	157437	GCA_013796065.1_ASM1379606v1_bin_1	121486	140821	gplas	139764	0.887745574420244	0.772	121486	0.863	0.815	19335	0.137301964905802	no	5	0	yes	no	2	2	5	0.4
GCA_013797045.1_ASM1379704v1	CP056895.1	98203	GCA_013797045.1_ASM1379704v1_bin_1	53823	53895	gplas	97969	0.997617180737859	0.548	53823	0.999	0.708	0	0	no	0	0	no	no	NA	NA	NA	NA
GCA_013797825.1_ASM1379782v1	CP056903.1	143282	GCA_013797825.1_ASM1379782v1_bin_1	45263	45342	gplas	107239	0.748447118270264	0.316	45263	0.998	0.48	0	0	no	0	0	no	no	NA	NA	NA	NA
GCA_013797825.1_ASM1379782v1	CP056904.1	97730	GCA_013797825.1_ASM1379782v1_bin_2	78289	104262	gplas	86062	0.880609843446229	0.801	78289	0.751	0.775	25891	0.24832633174119	no	0	0	no	no	NA	NA	NA	NA
GCA_013797825.1_ASM1379782v1	CP056905.1	4072	GCA_013797825.1_ASM1379782v1_bin_3	4072	4149	gplas	4072	1	1	4072	0.981	0.99	0	0	yes	0	0	no	no	NA	NA	NA	NA
GCA_013797825.1_ASM1379782v1	CP056906.1	1565	GCA_013797825.1_ASM1379782v1_bin_4	1565	1642	gplas	1565	1	1	1565	0.953	0.976	0	0	yes	0	0	no	no	NA	NA	NA	NA
GCA_013798625.1_ASM1379862v1	CP056915.1	143134	GCA_013798625.1_ASM1379862v1_bin_1	110288	114208	gplas	135857	0.949159528833121	0.771	110288	0.966	0.858	3858	0.0337804707200897	no	2	0	yes	no	2	2	2	1
GCA_013801205.1_ASM1380120v1	CP056956.1	150657	GCA_013801205.1_ASM1380120v1_bin_1	117774	117775	gplas	144212	0.957220706638258	0.782	117774	1	0.878	0	0	no	1	0	yes	no	NA	NA	NA	NA
GCA_013801205.1_ASM1380120v1	CP056957.1	7941	GCA_013801205.1_ASM1380120v1_bin_2	4446	8339	gplas	5427	0.683415187004156	0.56	4446	0.533	0.546	0	0	no	0	0	no	no	NA	NA	NA	NA
GCA_013801205.1_ASM1380120v1	CP056958.1	6715	not_detected	0	not_applicable	gplas	4590	0.683544303797468	NA	0	NA	NA	not_applicable	not_applicable	no	0	0	no	no	NA	NA	NA	NA
GCA_013801205.1_ASM1380120v1	CP056959.1	4593	not_detected	0	not_applicable	gplas	4021	0.875462660570433	NA	0	NA	NA	not_applicable	not_applicable	no	0	0	no	no	NA	NA	NA	NA
GCA_013801205.1_ASM1380120v1	CP056960.1	4073	GCA_013801205.1_ASM1380120v1_bin_2	3893	8339	gplas	3893	0.955806530812669	0.956	3893	0.467	0.627	0	0	no	0	0	no	no	NA	NA	NA	NA
GCA_013802065.1_ASM1380206v1	CP056983.1	1565	not_detected	0	not_applicable	gplas	0	0	NA	0	NA	NA	not_applicable	not_applicable	no	0	0	no	no	NA	NA	NA	NA
GCA_013802065.1_ASM1380206v1	CP056984.1	1552	not_detected	0	not_applicable	gplas	0	0	NA	0	NA	NA	not_applicable	not_applicable	no	0	0	no	no	NA	NA	NA	NA
GCA_013802065.1_ASM1380206v1	CP056975.1	94957	GCA_013802065.1_ASM1380206v1_bin_2	12376	25442	gplas	51162	0.538791242351801	0.13	12376	0.486	0.205	11507	0.45228362550114	no	0	0	no	no	NA	NA	NA	NA
GCA_013802065.1_ASM1380206v1	CP056975.1	94957	GCA_013802065.1_ASM1380206v1_bin_1	20354	41216	gplas	51162	0.538791242351801	0.214	20354	0.494	0.299	0	0	no	0	0	no	no	NA	NA	NA	NA
GCA_013802065.1_ASM1380206v1	CP056976.1	90751	GCA_013802065.1_ASM1380206v1_bin_3	15917	22545	gplas	79810	0.879439345020992	0.175	15917	0.706	0.28	0	0	no	0	0	no	no	NA	NA	NA	NA
GCA_013802065.1_ASM1380206v1	CP056977.1	89222	GCA_013802065.1_ASM1380206v1_bin_2	1559	25442	gplas	48396	0.54242227253368	0.017	1559	0.061	0.027	11507	0.45228362550114	no	4	0	yes	no	NA	NA	NA	NA
GCA_013802065.1_ASM1380206v1	CP056977.1	89222	GCA_013802065.1_ASM1380206v1_bin_1	20862	41216	gplas	48396	0.54242227253368	0.234	20862	0.506	0.32	0	0	no	4	0	yes	no	4	4	4	1
GCA_013802065.1_ASM1380206v1	CP056977.1	89222	GCA_013802065.1_ASM1380206v1_bin_3	6628	22545	gplas	48396	0.54242227253368	0.074	6628	0.294	0.118	0	0	no	4	0	yes	no	NA	NA	NA	NA
GCA_013802065.1_ASM1380206v1	CP056978.1	51984	not_detected	0	not_applicable	gplas	49021	0.943001692828563	NA	0	NA	NA	not_applicable	not_applicable	no	5	0	yes	no	NA	NA	5	NA
GCA_013802065.1_ASM1380206v1	CP056979.1	4072	GCA_013802065.1_ASM1380206v1_bin_5	4072	4149	gplas	4072	1	1	4072	0.981	0.99	0	0	yes	0	0	no	no	NA	NA	NA	NA
GCA_013802065.1_ASM1380206v1	CP056980.1	4018	GCA_013802065.1_ASM1380206v1_bin_4	3902	3902	gplas	3902	0.971129915380786	0.971	3902	1	0.985	0	0	yes	0	0	no	no	NA	NA	NA	NA
GCA_013802065.1_ASM1380206v1	CP056981.1	3751	GCA_013802065.1_ASM1380206v1_bin_6	3751	3828	gplas	3751	1	1	3751	0.98	0.99	0	0	yes	0	0	no	no	NA	NA	NA	NA
GCA_013802065.1_ASM1380206v1	CP056982.1	2601	not_detected	0	not_applicable	gplas	2485	0.955401768550557	NA	0	NA	NA	not_applicable	not_applicable	no	0	0	no	no	NA	NA	NA	NA
GCA_013802585.1_ASM1380258v1	CP056998.1	50161	GCA_013802585.1_ASM1380258v1_bin_1	21503	34250	gplas	43784	0.872869360658679	0.429	21503	0.628	0.51	6538	0.190890510948905	no	1	0	yes	no	1	1	1	1
GCA_013802585.1_ASM1380258v1	CP056999.1	44007	GCA_013802585.1_ASM1380258v1_bin_1	6209	34250	gplas	36542	0.830367896016543	0.141	6209	0.181	0.159	6538	0.190890510948905	no	7	1	yes	yes	NA	NA	NA	NA
GCA_013802585.1_ASM1380258v1	CP057000.1	8136	GCA_013802585.1_ASM1380258v1_bin_2	7539	7539	gplas	7539	0.926622418879056	0.927	7539	1	0.962	0	0	yes	0	0	no	no	NA	NA	NA	NA
GCA_013802585.1_ASM1380258v1	CP057001.1	2460	GCA_013802585.1_ASM1380258v1_bin_3	2460	2537	gplas	2460	1	1	2460	0.97	0.985	0	0	yes	0	0	no	no	NA	NA	NA	NA
GCA_013803745.1_ASM1380374v1	CP057013.1	89908	GCA_013803745.1_ASM1380374v1_bin_1	80491	80491	gplas	89220	0.992347733238422	0.895	80491	1	0.945	0	0	no	0	0	no	no	NA	NA	NA	NA
GCA_013803745.1_ASM1380374v1	CP057013.1	89908	GCA_013803745.1_ASM1380374v1_bin_2	5334	5334	gplas	89220	0.992347733238422	0.059	5334	1	0.111	0	0	no	0	0	no	no	NA	NA	NA	NA
GCA_013803905.1_ASM1380390v1	CP057017.1	89908	GCA_013803905.1_ASM1380390v1_bin_1	85825	85825	gplas	89220	0.992347733238422	0.955	85825	1	0.977	0	0	yes	0	0	no	no	NA	NA	NA	NA
GCA_013804065.1_ASM1380406v1	CP057015.1	89908	GCA_013804065.1_ASM1380406v1_bin_1	80491	80491	gplas	89220	0.992347733238422	0.895	80491	1	0.945	0	0	no	0	0	no	no	NA	NA	NA	NA
GCA_013804065.1_ASM1380406v1	CP057015.1	89908	GCA_013804065.1_ASM1380406v1_bin_2	5334	5334	gplas	89220	0.992347733238422	0.059	5334	1	0.111	0	0	no	0	0	no	no	NA	NA	NA	NA
GCA_013804445.1_ASM1380444v1	CP057021.1	54502	GCA_013804445.1_ASM1380444v1_bin_1	54369	54369	gplas	54369	0.997559722578988	0.998	54369	1	0.999	0	0	yes	0	0	no	no	NA	NA	NA	NA
GCA_013804645.1_ASM1380464v1	CP057023.1	89908	GCA_013804645.1_ASM1380464v1_bin_1	80491	80491	gplas	89220	0.992347733238422	0.895	80491	1	0.945	0	0	no	0	0	no	no	NA	NA	NA	NA
GCA_013804645.1_ASM1380464v1	CP057023.1	89908	GCA_013804645.1_ASM1380464v1_bin_2	5334	5334	gplas	89220	0.992347733238422	0.059	5334	1	0.111	0	0	no	0	0	no	no	NA	NA	NA	NA
GCA_013805505.1_ASM1380550v1	CP057032.1	62375	not_detected	0	not_applicable	gplas	42926	0.688192384769539	NA	0	NA	NA	not_applicable	not_applicable	no	0	0	no	no	NA	NA	NA	NA
GCA_013805505.1_ASM1380550v1	CP057033.1	55483	not_detected	0	not_applicable	gplas	55350	0.997602869347368	NA	0	NA	NA	not_applicable	not_applicable	no	0	0	no	no	NA	NA	NA	NA
GCA_013806085.1_ASM1380608v1	CP057046.1	129449	GCA_013806085.1_ASM1380608v1_bin_3	13125	13125	gplas	123310	0.952575917929069	0.101	13125	1	0.183	0	0	no	0	0	no	no	NA	NA	NA	NA
GCA_013806085.1_ASM1380608v1	CP057046.1	129449	GCA_013806085.1_ASM1380608v1_bin_1	61774	61774	gplas	123310	0.952575917929069	0.477	61774	1	0.646	0	0	no	0	0	no	no	NA	NA	NA	NA
GCA_013806085.1_ASM1380608v1	CP057047.1	93415	not_detected	0	not_applicable	gplas	90713	0.971075309104534	NA	0	NA	NA	not_applicable	not_applicable	no	0	0	no	no	NA	NA	NA	NA
GCA_013806085.1_ASM1380608v1	CP057048.1	38481	GCA_013806085.1_ASM1380608v1_bin_2	36452	36452	gplas	38217	0.993139471427458	0.947	36452	1	0.973	0	0	yes	0	0	no	no	NA	NA	NA	NA
GCA_013806085.1_ASM1380608v1	CP057048.1	38481	GCA_013806085.1_ASM1380608v1_bin_4	1765	1765	gplas	38217	0.993139471427458	0.046	1765	1	0.088	0	0	no	0	0	no	no	NA	NA	NA	NA
GCA_013806085.1_ASM1380608v1	CP057049.1	4671	GCA_013806085.1_ASM1380608v1_bin_5	4671	4748	gplas	4671	1	1	4671	0.984	0.992	0	0	yes	0	0	no	no	NA	NA	NA	NA
GCA_013806525.1_ASM1380652v1	CP057051.1	129449	GCA_013806525.1_ASM1380652v1_bin_3	15446	15454	gplas	123310	0.952575917929069	0.119	15446	0.999	0.213	0	0	no	0	0	no	no	NA	NA	NA	NA
GCA_013806525.1_ASM1380652v1	CP057051.1	129449	GCA_013806525.1_ASM1380652v1_bin_1	61774	61774	gplas	123310	0.952575917929069	0.477	61774	1	0.646	0	0	no	0	0	no	no	NA	NA	NA	NA
GCA_013806525.1_ASM1380652v1	CP057052.1	93415	not_detected	0	not_applicable	gplas	90713	0.971075309104534	NA	0	NA	NA	not_applicable	not_applicable	no	0	0	no	no	NA	NA	NA	NA
GCA_013806525.1_ASM1380652v1	CP057053.1	38481	GCA_013806525.1_ASM1380652v1_bin_2	36452	36452	gplas	38217	0.993139471427458	0.947	36452	1	0.973	0	0	yes	0	0	no	no	NA	NA	NA	NA
GCA_013806525.1_ASM1380652v1	CP057054.1	4671	GCA_013806525.1_ASM1380652v1_bin_5	4671	4748	gplas	4671	1	1	4671	0.984	0.992	0	0	yes	0	0	no	no	NA	NA	NA	NA
GCA_013806725.1_ASM1380672v1	CP057056.1	96046	GCA_013806725.1_ASM1380672v1_bin_1	38201	38201	gplas	89416	0.930970576598713	0.398	38201	1	0.569	0	0	no	0	0	no	no	NA	NA	NA	NA
GCA_013812015.1_ASM1381201v1	CP057073.1	137565	GCA_013812015.1_ASM1381201v1_bin_3	137565	137642	gplas	137565	1	1	137565	0.999	0.999	0	0	yes	0	0	no	no	NA	NA	NA	NA
GCA_013812015.1_ASM1381201v1	CP057074.1	4145	not_detected	0	not_applicable	gplas	3507	0.846079613992762	NA	0	NA	NA	not_applicable	not_applicable	no	0	0	no	no	NA	NA	NA	NA
GCA_013812225.1_ASM1381222v1	CP057084.1	1948	not_detected	0	not_applicable	gplas	1891	0.970739219712526	NA	0	NA	NA	not_applicable	not_applicable	no	0	0	no	no	NA	NA	NA	NA
GCA_013812225.1_ASM1381222v1	CP057076.1	123830	GCA_013812225.1_ASM1381222v1_bin_4	74505	77368	gplas	97210	0.785027860776871	0.602	74505	0.963	0.741	0	0	no	0	0	no	no	NA	NA	NA	NA
GCA_013812225.1_ASM1381222v1	CP057076.1	123830	GCA_013812225.1_ASM1381222v1_bin_2	2629	35049	gplas	97210	0.785027860776871	0.021	2629	0.075	0.033	11191	0.319295842962709	no	0	0	no	no	NA	NA	NA	NA
GCA_013812225.1_ASM1381222v1	CP057077.1	51116	not_detected	0	not_applicable	gplas	47683	0.932839032788168	NA	0	NA	NA	not_applicable	not_applicable	no	5	0	yes	no	NA	NA	5	NA
GCA_013812225.1_ASM1381222v1	CP057078.1	50516	GCA_013812225.1_ASM1381222v1_bin_4	2793	77368	gplas	39524	0.782405574471455	0.055	2793	0.036	0.044	0	0	no	0	0	no	no	NA	NA	NA	NA
GCA_013812225.1_ASM1381222v1	CP057078.1	50516	GCA_013812225.1_ASM1381222v1_bin_2	17559	35049	gplas	39524	0.782405574471455	0.348	17559	0.501	0.411	11191	0.319295842962709	no	0	0	no	no	NA	NA	NA	NA
GCA_013812225.1_ASM1381222v1	CP057079.1	27257	GCA_013812225.1_ASM1381222v1_bin_2	3603	35049	gplas	23247	0.852881828521114	0.132	3603	0.103	0.116	11191	0.319295842962709	no	0	0	no	no	NA	NA	NA	NA
GCA_013812225.1_ASM1381222v1	CP057080.1	5973	not_detected	0	not_applicable	gplas	4658	0.779842625146492	NA	0	NA	NA	not_applicable	not_applicable	no	0	0	no	no	NA	NA	NA	NA
GCA_013812225.1_ASM1381222v1	CP057081.1	5552	not_detected	0	not_applicable	gplas	4220	0.760086455331412	NA	0	NA	NA	not_applicable	not_applicable	no	0	0	no	no	NA	NA	NA	NA
GCA_013812225.1_ASM1381222v1	CP057082.1	4678	not_detected	0	not_applicable	gplas	4678	1	NA	0	NA	NA	not_applicable	not_applicable	no	0	0	no	no	NA	NA	NA	NA
GCA_013812225.1_ASM1381222v1	CP057083.1	3702	not_detected	0	not_applicable	gplas	1159	0.313074014046461	NA	0	NA	NA	not_applicable	not_applicable	no	0	0	no	no	NA	NA	NA	NA
GCA_013812575.1_ASM1381257v1	CP057088.1	140512	GCA_013812575.1_ASM1381257v1_bin_1	95599	95599	gplas	126612	0.90107606467775	0.68	95599	1	0.81	0	0	no	1	0	yes	no	NA	NA	NA	NA
GCA_013812575.1_ASM1381257v1	CP057089.1	45753	GCA_013812575.1_ASM1381257v1_bin_2	30228	30228	gplas	39862	0.871243415732302	0.661	30228	1	0.796	0	0	no	0	0	no	no	NA	NA	NA	NA
GCA_013813585.1_ASM1381358v1	CP057110.1	106811	GCA_013813585.1_ASM1381358v1_bin_1	96400	96400	gplas	101771	0.952813848760895	0.903	96400	1	0.949	0	0	no	0	0	no	no	NA	NA	NA	NA
GCA_013813585.1_ASM1381358v1	CP057111.1	5686	GCA_013813585.1_ASM1381358v1_bin_3	5686	5763	gplas	5686	1	1	5686	0.987	0.993	0	0	yes	0	0	no	no	NA	NA	NA	NA
GCA_013815235.1_ASM1381523v1	CP057134.1	136933	GCA_013815235.1_ASM1381523v1_bin_1	81319	81530	gplas	124046	0.905888281130188	0.594	81319	0.997	0.744	0	0	no	0	0	no	no	NA	NA	NA	NA
GCA_013815235.1_ASM1381523v1	CP057135.1	100897	GCA_013815235.1_ASM1381523v1_bin_2	59762	59958	gplas	85464	0.84704203296431	0.592	59762	0.997	0.743	0	0	no	0	0	no	no	NA	NA	NA	NA
GCA_013815445.1_ASM1381544v1	CP057138.1	86321	not_detected	0	not_applicable	gplas	84277	0.976320941601696	NA	0	NA	NA	not_applicable	not_applicable	no	0	0	no	no	NA	NA	NA	NA
GCA_013815865.1_ASM1381586v1	CP057140.1	105018	GCA_013815865.1_ASM1381586v1_bin_1	55560	57401	gplas	99089	0.943543011674189	0.529	55560	0.968	0.684	1841	0.0320726119754011	no	0	0	no	no	NA	NA	NA	NA
GCA_013815865.1_ASM1381586v1	CP057140.1	105018	GCA_013815865.1_ASM1381586v1_bin_3	11068	11068	gplas	99089	0.943543011674189	0.105	11068	1	0.19	0	0	no	0	0	no	no	NA	NA	NA	NA
GCA_013815865.1_ASM1381586v1	CP057140.1	105018	GCA_013815865.1_ASM1381586v1_bin_2	12404	12404	gplas	99089	0.943543011674189	0.118	12404	1	0.211	0	0	no	0	0	no	no	NA	NA	NA	NA
GCA_013816045.1_ASM1381604v1	CP057142.1	89539	GCA_013816045.1_ASM1381604v1_bin_1	85511	85511	gplas	88959	0.993522375724545	0.955	85511	1	0.977	0	0	yes	0	0	no	no	NA	NA	NA	NA
GCA_013816045.1_ASM1381604v1	CP057143.1	4821	not_detected	0	not_applicable	gplas	4786	0.992740095415889	NA	0	NA	NA	not_applicable	not_applicable	no	0	0	no	no	NA	NA	NA	NA
GCA_013818265.1_ASM1381826v1	CP057172.1	94854	not_detected	0	not_applicable	gplas	94854	1	NA	0	NA	NA	not_applicable	not_applicable	no	0	0	no	no	NA	NA	NA	NA
GCA_013819805.1_ASM1381980v1	CP057224.1	102840	not_detected	0	not_applicable	gplas	94402	0.917950213924543	NA	0	NA	NA	not_applicable	not_applicable	no	0	0	no	no	NA	NA	NA	NA
GCA_013819985.1_ASM1381998v1	CP057226.1	143708	GCA_013819985.1_ASM1381998v1_bin_1	103770	103816	gplas	142338	0.990466779859159	0.722	103770	1	0.839	0	0	no	0	0	no	no	NA	NA	NA	NA
GCA_013819985.1_ASM1381998v1	CP057227.1	6760	not_detected	0	not_applicable	gplas	6760	1	NA	0	NA	NA	not_applicable	not_applicable	no	0	0	no	no	NA	NA	NA	NA
GCA_013819985.1_ASM1381998v1	CP057228.1	2590	not_detected	0	not_applicable	gplas	0	0	NA	0	NA	NA	not_applicable	not_applicable	no	0	0	no	no	NA	NA	NA	NA
GCA_013821185.1_ASM1382118v1	CP057251.1	110652	GCA_013821185.1_ASM1382118v1_bin_1	89036	92576	gplas	110235	0.996231428261577	0.805	89036	0.962	0.877	3540	0.0382388524023505	no	0	0	no	no	NA	NA	NA	NA
GCA_013821185.1_ASM1382118v1	CP057252.1	109291	GCA_013821185.1_ASM1382118v1_bin_4	4216	4216	gplas	105048	0.96117704111043	0.039	4216	1	0.075	0	0	no	0	0	no	no	NA	NA	NA	NA
GCA_013821185.1_ASM1382118v1	CP057252.1	109291	GCA_013821185.1_ASM1382118v1_bin_2	52595	52629	gplas	105048	0.96117704111043	0.481	52595	0.999	0.649	0	0	no	0	0	no	no	NA	NA	NA	NA
GCA_013821185.1_ASM1382118v1	CP057253.1	4671	GCA_013821185.1_ASM1382118v1_bin_5	4671	4748	gplas	4671	1	1	4671	0.984	0.992	0	0	yes	0	0	no	no	NA	NA	NA	NA
GCA_013821835.1_ASM1382183v1	CP057260.1	93611	GCA_013821835.1_ASM1382183v1_bin_1	36039	46440	gplas	80728	0.862377284720813	0.385	36039	0.776	0.515	10401	0.223966408268734	no	0	0	no	no	NA	NA	NA	NA
GCA_013821835.1_ASM1382183v1	CP057261.1	5101	not_detected	0	not_applicable	gplas	5101	1	NA	0	NA	NA	not_applicable	not_applicable	no	0	0	no	no	NA	NA	NA	NA
GCA_013822325.1_ASM1382232v1	CP057271.1	221223	GCA_013822325.1_ASM1382232v1_bin_1	60252	70904	gplas	211328	0.955271377750053	0.272	60252	0.85	0.412	10652	0.15023129865734	no	7	1	yes	yes	NA	NA	NA	NA
GCA_013822325.1_ASM1382232v1	CP057272.1	5569	GCA_013822325.1_ASM1382232v1_bin_2	5569	5646	gplas	5569	1	1	5569	0.986	0.993	0	0	yes	0	0	no	no	NA	NA	NA	NA
GCA_013822575.1_ASM1382257v1	CP057277.1	221169	GCA_013822575.1_ASM1382257v1_bin_1	9641	65149	gplas	209299	0.946330634040033	0.044	9641	0.148	0.068	30607	0.469799996930114	no	7	1	yes	yes	1	1	7	0.142857142857143
GCA_013822575.1_ASM1382257v1	CP057278.1	84509	GCA_013822575.1_ASM1382257v1_bin_1	24901	65149	gplas	71993	0.851897431042848	0.295	24901	0.382	0.333	30607	0.469799996930114	no	0	0	no	no	NA	NA	NA	NA
GCA_013822575.1_ASM1382257v1	CP057279.1	5101	not_detected	0	not_applicable	gplas	3485	0.683199372672025	NA	0	NA	NA	not_applicable	not_applicable	no	0	0	no	no	NA	NA	NA	NA
GCA_013822575.1_ASM1382257v1	CP057280.1	4044	not_detected	0	not_applicable	gplas	1380	0.341246290801187	NA	0	NA	NA	not_applicable	not_applicable	no	0	0	no	no	NA	NA	NA	NA
GCA_013823335.1_ASM1382333v1	CP057179.1	73399	GCA_013823335.1_ASM1382333v1_bin_3	30765	30765	gplas	63870	0.870175342988324	0.419	30765	1	0.591	0	0	no	0	0	no	no	NA	NA	NA	NA
GCA_013823335.1_ASM1382333v1	CP057179.1	73399	GCA_013823335.1_ASM1382333v1_bin_1	4006	4059	gplas	63870	0.870175342988324	0.055	4006	0.987	0.104	0	0	no	0	0	no	no	NA	NA	NA	NA
GCA_013823335.1_ASM1382333v1	CP057180.1	54517	GCA_013823335.1_ASM1382333v1_bin_4	2942	2942	gplas	45656	0.83746354348185	0.054	2942	1	0.102	0	0	no	1	0	yes	no	NA	NA	NA	NA
GCA_013823335.1_ASM1382333v1	CP057180.1	54517	GCA_013823335.1_ASM1382333v1_bin_2	35750	35803	gplas	45656	0.83746354348185	0.656	35750	0.999	0.792	0	0	no	1	0	yes	no	1	1	1	1
GCA_013823335.1_ASM1382333v1	CP057181.1	2974	GCA_013823335.1_ASM1382333v1_bin_6	2911	3051	gplas	2911	0.978816408876933	0.979	2911	0.954	0.966	0	0	yes	0	0	no	no	NA	NA	NA	NA
GCA_013823335.1_ASM1382333v1	CP057182.1	2519	not_detected	0	not_applicable	gplas	2519	1	NA	0	NA	NA	not_applicable	not_applicable	no	0	0	no	no	NA	NA	NA	NA
GCA_013823335.1_ASM1382333v1	CP057183.1	1603	not_detected	0	not_applicable	gplas	1170	0.729881472239551	NA	0	NA	NA	not_applicable	not_applicable	no	0	0	no	no	NA	NA	NA	NA
GCA_013823335.1_ASM1382333v1	CP057184.1	1552	not_detected	0	not_applicable	gplas	1058	0.681701030927835	NA	0	NA	NA	not_applicable	not_applicable	no	0	0	no	no	NA	NA	NA	NA
GCA_013823865.1_ASM1382386v1	CP057189.1	1551	not_detected	0	not_applicable	gplas	1551	1	NA	0	NA	NA	not_applicable	not_applicable	no	0	0	no	no	NA	NA	NA	NA
GCA_013823975.1_ASM1382397v1	CP057191.1	102988	not_detected	0	not_applicable	gplas	100431	0.975171864683264	NA	0	NA	NA	not_applicable	not_applicable	no	0	0	no	no	NA	NA	NA	NA
GCA_013824345.1_ASM1382434v1	CP057195.1	115217	GCA_013824345.1_ASM1382434v1_bin_1	54697	106560	gplas	106286	0.922485397120217	0.475	54697	0.513	0.493	3995	0.0374906156156156	no	0	0	no	no	NA	NA	NA	NA
GCA_013824345.1_ASM1382434v1	CP057196.1	77708	GCA_013824345.1_ASM1382434v1_bin_1	47866	106560	gplas	69840	0.898749163535286	0.616	47866	0.449	0.519	3995	0.0374906156156156	no	0	0	no	no	NA	NA	NA	NA
GCA_013824345.1_ASM1382434v1	CP057197.1	7329	not_detected	0	not_applicable	gplas	5471	0.746486560240142	NA	0	NA	NA	not_applicable	not_applicable	no	0	0	no	no	NA	NA	NA	NA
GCA_013824345.1_ASM1382434v1	CP057198.1	6275	GCA_013824345.1_ASM1382434v1_bin_2	5987	5987	gplas	5987	0.954103585657371	0.954	5987	1	0.976	0	0	yes	0	0	no	no	NA	NA	NA	NA
GCA_013824345.1_ASM1382434v1	CP057199.1	3782	not_detected	0	not_applicable	gplas	3494	0.923849814912745	NA	0	NA	NA	not_applicable	not_applicable	no	0	0	no	no	NA	NA	NA	NA
GCA_013824985.1_ASM1382498v1	CP057288.1	196445	GCA_013824985.1_ASM1382498v1_bin_1	134254	134280	gplas	185383	0.943689073277508	0.683	134254	1	0.812	0	0	no	12	0	yes	no	10	10	12	0.833333333333333
GCA_013824985.1_ASM1382498v1	CP057288.1	196445	GCA_013824985.1_ASM1382498v1_bin_2	7227	68167	gplas	185383	0.943689073277508	0.037	7227	0.106	0.055	0	0	no	12	0	yes	no	NA	NA	NA	NA
GCA_013824985.1_ASM1382498v1	CP057289.1	85551	GCA_013824985.1_ASM1382498v1_bin_2	60940	68167	gplas	81595	0.953758576755386	0.712	60940	0.894	0.793	0	0	no	0	0	no	no	NA	NA	NA	NA
GCA_013824985.1_ASM1382498v1	CP057290.1	44632	GCA_013824985.1_ASM1382498v1_bin_3	26112	26146	gplas	35956	0.805610324430902	0.585	26112	0.999	0.738	0	0	no	0	0	no	no	NA	NA	NA	NA
GCA_013824985.1_ASM1382498v1	CP057291.1	5128	not_detected	0	not_applicable	gplas	5097	0.993954758190328	NA	0	NA	NA	not_applicable	not_applicable	no	0	0	no	no	NA	NA	NA	NA
GCA_013824985.1_ASM1382498v1	CP057292.1	3126	not_detected	0	not_applicable	gplas	3095	0.990083173384517	NA	0	NA	NA	not_applicable	not_applicable	no	0	0	no	no	NA	NA	NA	NA
GCA_013825245.1_ASM1382524v1	CP057294.1	120503	GCA_013825245.1_ASM1382524v1_bin_4	43537	64557	gplas	104119	0.864036580002158	0.361	43537	0.674	0.47	0	0	no	6	0	yes	no	NA	NA	NA	NA
GCA_013825245.1_ASM1382524v1	CP057294.1	120503	GCA_013825245.1_ASM1382524v1_bin_1	32990	32990	gplas	104119	0.864036580002158	0.274	32990	1	0.43	0	0	no	6	0	yes	no	4	4	6	0.666666666666667
GCA_013825245.1_ASM1382524v1	CP057294.1	120503	GCA_013825245.1_ASM1382524v1_bin_2	1611	56089	gplas	104119	0.864036580002158	0.013	1611	0.029	0.018	4865	0.0867371498867871	no	6	0	yes	no	NA	NA	NA	NA
GCA_013825245.1_ASM1382524v1	CP057294.1	120503	GCA_013825245.1_ASM1382524v1_bin_3	2256	52893	gplas	104119	0.864036580002158	0.019	2256	0.043	0.026	0	0	no	6	0	yes	no	NA	NA	NA	NA
GCA_013825245.1_ASM1382524v1	CP057295.1	111016	GCA_013825245.1_ASM1382524v1_bin_4	5790	64557	gplas	76328	0.687540534697701	0.052	5790	0.09	0.066	0	0	no	1	0	yes	no	NA	NA	NA	NA
GCA_013825245.1_ASM1382524v1	CP057295.1	111016	GCA_013825245.1_ASM1382524v1_bin_2	12971	56089	gplas	76328	0.687540534697701	0.117	12971	0.231	0.155	4865	0.0867371498867871	no	1	0	yes	no	1	1	1	1
GCA_013825245.1_ASM1382524v1	CP057295.1	111016	GCA_013825245.1_ASM1382524v1_bin_3	41076	52893	gplas	76328	0.687540534697701	0.37	41076	0.777	0.501	0	0	no	1	0	yes	no	NA	NA	NA	NA
GCA_013825245.1_ASM1382524v1	CP057296.1	107564	GCA_013825245.1_ASM1382524v1_bin_4	1047	64557	gplas	61429	0.571092558848685	0.01	1047	0.016	0.012	0	0	no	0	0	no	no	NA	NA	NA	NA
GCA_013825245.1_ASM1382524v1	CP057296.1	107564	GCA_013825245.1_ASM1382524v1_bin_2	27718	56089	gplas	61429	0.571092558848685	0.258	27718	0.494	0.339	4865	0.0867371498867871	no	0	0	no	no	NA	NA	NA	NA
GCA_013825245.1_ASM1382524v1	CP057297.1	71653	GCA_013825245.1_ASM1382524v1_bin_4	14183	64557	gplas	48592	0.678157229983392	0.198	14183	0.22	0.208	0	0	no	0	0	no	no	NA	NA	NA	NA
GCA_013825245.1_ASM1382524v1	CP057297.1	71653	GCA_013825245.1_ASM1382524v1_bin_2	8920	56089	gplas	48592	0.678157229983392	0.124	8920	0.159	0.139	4865	0.0867371498867871	no	0	0	no	no	NA	NA	NA	NA
GCA_013825245.1_ASM1382524v1	CP057297.1	71653	GCA_013825245.1_ASM1382524v1_bin_3	9419	52893	gplas	48592	0.678157229983392	0.131	9419	0.178	0.151	0	0	no	0	0	no	no	NA	NA	NA	NA
GCA_013825245.1_ASM1382524v1	CP057298.1	7592	not_detected	0	not_applicable	gplas	2105	0.277265542676502	NA	0	NA	NA	not_applicable	not_applicable	no	0	0	no	no	NA	NA	NA	NA
GCA_013825245.1_ASM1382524v1	CP057299.1	6507	not_detected	0	not_applicable	gplas	4824	0.741355463347165	NA	0	NA	NA	not_applicable	not_applicable	no	0	0	no	no	NA	NA	NA	NA
GCA_013825245.1_ASM1382524v1	CP057300.1	5962	not_detected	0	not_applicable	gplas	4748	0.796377054679638	NA	0	NA	NA	not_applicable	not_applicable	no	0	0	no	no	NA	NA	NA	NA
GCA_013825245.1_ASM1382524v1	CP057301.1	5775	GCA_013825245.1_ASM1382524v1_bin_5	3849	3849	gplas	5331	0.923116883116883	0.666	3849	1	0.8	0	0	no	0	0	no	no	NA	NA	NA	NA
GCA_013827205.1_ASM1382720v1	CP057337.1	9653	not_detected	0	not_applicable	gplas	9633	0.997928105252253	NA	0	NA	NA	not_applicable	not_applicable	no	0	0	no	no	NA	NA	NA	NA
GCA_013827205.1_ASM1382720v1	CP057338.1	6930	not_detected	0	not_applicable	gplas	6930	1	NA	0	NA	NA	not_applicable	not_applicable	no	0	0	no	no	NA	NA	NA	NA
GCA_013827205.1_ASM1382720v1	CP057339.1	1551	not_detected	0	not_applicable	gplas	1551	1	NA	0	NA	NA	not_applicable	not_applicable	no	0	0	no	no	NA	NA	NA	NA
GCA_013827445.1_ASM1382744v1	CP057343.1	119787	GCA_013827445.1_ASM1382744v1_bin_1	119119	119119	gplas	119119	0.994423434930335	0.994	119119	1	0.997	0	0	yes	8	0	yes	no	8	8	8	1
GCA_013827685.1_ASM1382768v1	CP057341.1	119787	GCA_013827685.1_ASM1382768v1_bin_1	119119	119119	gplas	119119	0.994423434930335	0.994	119119	1	0.997	0	0	yes	8	0	yes	no	8	8	8	1
GCA_013828065.1_ASM1382806v1	CP057348.1	119787	not_detected	0	not_applicable	gplas	118202	0.986768180186498	NA	0	NA	NA	not_applicable	not_applicable	no	8	0	yes	no	NA	NA	8	NA
GCA_013828415.1_ASM1382841v1	CP057350.1	9653	not_detected	0	not_applicable	gplas	9653	1	NA	0	NA	NA	not_applicable	not_applicable	no	0	0	no	no	NA	NA	NA	NA
GCA_013828415.1_ASM1382841v1	CP057351.1	6930	not_detected	0	not_applicable	gplas	6930	1	NA	0	NA	NA	not_applicable	not_applicable	no	0	0	no	no	NA	NA	NA	NA
GCA_013828415.1_ASM1382841v1	CP057352.1	1551	not_detected	0	not_applicable	gplas	1551	1	NA	0	NA	NA	not_applicable	not_applicable	no	0	0	no	no	NA	NA	NA	NA
GCA_013829445.1_ASM1382944v1	CP057369.1	151320	GCA_013829445.1_ASM1382944v1_bin_2	45788	45788	gplas	126698	0.837285223367698	0.303	45788	1	0.465	0	0	no	8	0	yes	no	5	5	8	0.625
GCA_013829445.1_ASM1382944v1	CP057370.1	44527	GCA_013829445.1_ASM1382944v1_bin_1	28069	28069	gplas	39912	0.89635502054933	0.63	28069	1	0.773	0	0	no	1	0	yes	no	NA	NA	NA	NA
GCA_013829905.1_ASM1382990v1	CP057379.1	43019	GCA_013829905.1_ASM1382990v1_bin_1	6690	6690	gplas	37357	0.86838373741835	0.156	6690	1	0.27	0	0	no	4	0	yes	no	1	1	4	0.25
GCA_013830785.1_ASM1383078v1	CP057397.1	243494	GCA_013830785.1_ASM1383078v1_bin_1	153735	309045	gplas	233852	0.960401488332361	0.631	153735	0.497	0.556	6851	0.0221682926434662	no	6	0	yes	no	4	4	6	0.666666666666667
GCA_013830785.1_ASM1383078v1	CP057398.1	165151	GCA_013830785.1_ASM1383078v1_bin_1	70967	309045	gplas	138042	0.835853249450503	0.43	70967	0.23	0.3	6851	0.0221682926434662	no	0	0	no	no	NA	NA	NA	NA
GCA_013830785.1_ASM1383078v1	CP057399.1	110894	GCA_013830785.1_ASM1383078v1_bin_1	40886	309045	gplas	81884	0.738398831316392	0.369	40886	0.132	0.194	6851	0.0221682926434662	no	1	0	yes	no	NA	NA	NA	NA
GCA_013830785.1_ASM1383078v1	CP057400.1	97590	GCA_013830785.1_ASM1383078v1_bin_1	36481	309045	gplas	79254	0.812111896710729	0.374	36481	0.118	0.179	6851	0.0221682926434662	no	1	0	yes	no	NA	NA	NA	NA
GCA_013830785.1_ASM1383078v1	CP057401.1	6888	GCA_013830785.1_ASM1383078v1_bin_2	6888	6965	gplas	6888	1	1	6888	0.989	0.994	0	0	yes	0	0	no	no	NA	NA	NA	NA
GCA_013832285.1_ASM1383228v1	CP057424.1	112965	GCA_013832285.1_ASM1383228v1_bin_1	67407	67407	gplas	107501	0.951631036161643	0.597	67407	1	0.748	0	0	no	0	0	no	no	NA	NA	NA	NA
GCA_013832285.1_ASM1383228v1	CP057425.1	6888	GCA_013832285.1_ASM1383228v1_bin_2	6759	6759	gplas	6759	0.981271777003484	0.981	6759	1	0.99	0	0	yes	0	0	no	no	NA	NA	NA	NA
GCA_013832285.1_ASM1383228v1	CP057426.1	6676	not_detected	0	not_applicable	gplas	6676	1	NA	0	NA	NA	not_applicable	not_applicable	no	0	0	no	no	NA	NA	NA	NA
GCA_013832285.1_ASM1383228v1	CP057427.1	4241	GCA_013832285.1_ASM1383228v1_bin_3	4112	4112	gplas	4112	0.969582645602452	0.97	4112	1	0.985	0	0	yes	0	0	no	no	NA	NA	NA	NA
GCA_013832285.1_ASM1383228v1	CP057428.1	1552	GCA_013832285.1_ASM1383228v1_bin_5	1552	1629	gplas	1552	1	1	1552	0.953	0.976	0	0	yes	0	0	no	no	NA	NA	NA	NA
GCA_013832525.1_ASM1383252v1	CP057433.1	96190	GCA_013832525.1_ASM1383252v1_bin_2	7537	14390	gplas	95235	0.990071733028381	0.078	7537	0.524	0.136	6853	0.476233495482974	no	0	0	no	no	NA	NA	NA	NA
GCA_013832525.1_ASM1383252v1	CP057434.1	52356	GCA_013832525.1_ASM1383252v1_bin_1	33273	33273	gplas	51484	0.983344793337917	0.636	33273	1	0.778	0	0	no	0	0	no	no	NA	NA	NA	NA
GCA_013832965.1_ASM1383296v1	CP057439.1	96190	GCA_013832965.1_ASM1383296v1_bin_1	95235	100443	gplas	95235	0.990071733028381	0.99	95235	0.948	0.969	5208	0.0518503031570144	yes	0	0	no	no	NA	NA	NA	NA
GCA_013832965.1_ASM1383296v1	CP057440.1	52356	GCA_013832965.1_ASM1383296v1_bin_2	33273	33273	gplas	51484	0.983344793337917	0.636	33273	1	0.778	0	0	no	0	0	no	no	NA	NA	NA	NA
GCA_013833985.1_ASM1383398v1	CP057454.1	4315	not_detected	0	not_applicable	gplas	4315	1	NA	0	NA	NA	not_applicable	not_applicable	no	0	0	no	no	NA	NA	NA	NA
GCA_013834305.1_ASM1383430v1	CP057456.1	95109	GCA_013834305.1_ASM1383430v1_bin_1	86080	86114	gplas	92640	0.974040311642431	0.905	86080	1	0.95	0	0	yes	0	0	no	no	NA	NA	NA	NA
GCA_013834305.1_ASM1383430v1	CP057457.1	6811	GCA_013834305.1_ASM1383430v1_bin_2	6811	6888	gplas	6811	1	1	6811	0.989	0.994	0	0	yes	0	0	no	no	NA	NA	NA	NA
GCA_013835585.1_ASM1383558v1	CP057474.1	83477	GCA_013835585.1_ASM1383558v1_bin_1	55447	55481	gplas	82676	0.990404542568612	0.664	55447	0.999	0.798	0	0	no	0	0	no	no	NA	NA	NA	NA
GCA_013835785.1_ASM1383578v1	CP057476.1	98711	GCA_013835785.1_ASM1383578v1_bin_1	82244	82244	gplas	96677	0.979394393735247	0.833	82244	1	0.909	0	0	no	0	0	no	no	NA	NA	NA	NA
GCA_013835785.1_ASM1383578v1	CP057477.1	84397	GCA_013835785.1_ASM1383578v1_bin_3	36329	36386	gplas	80167	0.949879735061673	0.43	36329	0.998	0.601	0	0	no	0	0	no	no	NA	NA	NA	NA
GCA_013835785.1_ASM1383578v1	CP057478.1	58013	GCA_013835785.1_ASM1383578v1_bin_2	24807	24807	gplas	56223	0.969144846844673	0.428	24807	1	0.599	0	0	no	0	0	no	no	NA	NA	NA	NA
GCA_013837755.1_ASM1383775v1	CP057494.1	144318	GCA_013837755.1_ASM1383775v1_bin_1	123571	133421	gplas	143581	0.994893221912721	0.856	123571	0.926	0.89	9739	0.0729945061122312	no	0	0	no	no	NA	NA	NA	NA
GCA_013837755.1_ASM1383775v1	CP057495.1	6826	not_detected	0	not_applicable	gplas	6826	1	NA	0	NA	NA	not_applicable	not_applicable	no	0	0	no	no	NA	NA	NA	NA
GCA_013837755.1_ASM1383775v1	CP057496.1	6229	not_detected	0	not_applicable	gplas	4831	0.775565901428801	NA	0	NA	NA	not_applicable	not_applicable	no	0	0	no	no	NA	NA	NA	NA
GCA_013837755.1_ASM1383775v1	CP057497.1	5147	GCA_013837755.1_ASM1383775v1_bin_2	1609	1609	gplas	1609	0.31260928696328	0.313	1609	1	0.477	0	0	no	0	0	no	no	NA	NA	NA	NA
GCA_013837755.1_ASM1383775v1	CP057498.1	2590	not_detected	0	not_applicable	gplas	1718	0.663320463320463	NA	0	NA	NA	not_applicable	not_applicable	no	0	0	no	no	NA	NA	NA	NA
GCA_013837755.1_ASM1383775v1	CP057499.1	1551	GCA_013837755.1_ASM1383775v1_bin_3	1551	1628	gplas	1551	1	1	1551	0.953	0.976	0	0	yes	0	0	no	no	NA	NA	NA	NA
GCA_013884735.1_ASM1388473v1	CP057524.1	86339	not_detected	0	not_applicable	gplas	84295	0.976325878224209	NA	0	NA	NA	not_applicable	not_applicable	no	0	0	no	no	NA	NA	NA	NA
GCA_013884935.1_ASM1388493v1	CP057536.1	109433	GCA_013884935.1_ASM1388493v1_bin_2	3349	3349	gplas	101610	0.928513336927618	0.031	3349	1	0.06	0	0	no	0	0	no	no	NA	NA	NA	NA
GCA_013884935.1_ASM1388493v1	CP057536.1	109433	GCA_013884935.1_ASM1388493v1_bin_1	66899	66955	gplas	101610	0.928513336927618	0.611	66899	0.999	0.758	0	0	no	0	0	no	no	NA	NA	NA	NA
GCA_013884935.1_ASM1388493v1	CP057537.1	6930	not_detected	0	not_applicable	gplas	6845	0.987734487734488	NA	0	NA	NA	not_applicable	not_applicable	no	0	0	no	no	NA	NA	NA	NA
GCA_013884935.1_ASM1388493v1	CP057538.1	4721	not_detected	0	not_applicable	gplas	4636	0.981995339970345	NA	0	NA	NA	not_applicable	not_applicable	no	0	0	no	no	NA	NA	NA	NA
GCA_013885155.1_ASM1388515v1	CP057540.1	98678	GCA_013885155.1_ASM1388515v1_bin_1	87987	88022	gplas	92624	0.938648938973226	0.892	87987	1	0.943	0	0	no	0	0	no	no	NA	NA	NA	NA
GCA_013885155.1_ASM1388515v1	CP057541.1	60884	GCA_013885155.1_ASM1388515v1_bin_2	48400	48400	gplas	56381	0.926039682018264	0.795	48400	1	0.886	0	0	no	0	0	no	no	NA	NA	NA	NA
GCA_013885155.1_ASM1388515v1	CP057542.1	7198	GCA_013885155.1_ASM1388515v1_bin_3	7198	7270	gplas	7198	1	1	7198	0.99	0.995	0	0	yes	0	0	no	no	NA	NA	NA	NA
GCA_013885155.1_ASM1388515v1	CP057543.1	6230	GCA_013885155.1_ASM1388515v1_bin_5	6230	6307	gplas	6230	1	1	6230	0.988	0.994	0	0	yes	0	0	no	no	NA	NA	NA	NA
GCA_013885155.1_ASM1388515v1	CP057544.1	3257	GCA_013885155.1_ASM1388515v1_bin_4	3257	3329	gplas	3257	1	1	3257	0.978	0.989	0	0	yes	0	0	no	no	NA	NA	NA	NA
GCA_013885915.1_ASM1388591v1	CP057560.1	109880	not_detected	0	not_applicable	gplas	109880	1	NA	0	NA	NA	not_applicable	not_applicable	no	0	0	no	no	NA	NA	NA	NA
GCA_013886475.1_ASM1388647v1	CP057571.1	121488	GCA_013886475.1_ASM1388647v1_bin_1	79241	79339	gplas	115518	0.950859344132754	0.652	79241	0.999	0.789	0	0	no	0	0	no	no	NA	NA	NA	NA
GCA_013886475.1_ASM1388647v1	CP057572.1	92191	not_detected	0	not_applicable	gplas	90767	0.984553806770726	NA	0	NA	NA	not_applicable	not_applicable	no	0	0	no	no	NA	NA	NA	NA
GCA_013886475.1_ASM1388647v1	CP057573.1	4671	GCA_013886475.1_ASM1388647v1_bin_3	4671	4748	gplas	4671	1	1	4671	0.984	0.992	0	0	yes	0	0	no	no	NA	NA	NA	NA
GCA_013886595.1_ASM1388659v1	CP057578.1	78258	not_detected	0	not_applicable	gplas	77798	0.994122006695801	NA	0	NA	NA	not_applicable	not_applicable	no	0	0	no	no	NA	NA	NA	NA
GCA_013886595.1_ASM1388659v1	CP057579.1	32449	not_detected	0	not_applicable	gplas	32059	0.987981139634503	NA	0	NA	NA	not_applicable	not_applicable	no	0	0	no	no	NA	NA	NA	NA
GCA_013886735.1_ASM1388673v1	CP057581.1	54794	GCA_013886735.1_ASM1388673v1_bin_1	17279	17279	gplas	52467	0.957531846552542	0.315	17279	1	0.479	0	0	no	0	0	no	no	NA	NA	NA	NA
GCA_013886735.1_ASM1388673v1	CP057581.1	54794	GCA_013886735.1_ASM1388673v1_bin_2	12341	12359	gplas	52467	0.957531846552542	0.225	12341	0.999	0.367	0	0	no	0	0	no	no	NA	NA	NA	NA
GCA_013888235.1_ASM1388823v1	CP057601.1	63983	GCA_013888235.1_ASM1388823v1_bin_1	36903	36903	gplas	62678	0.979603957301158	0.577	36903	1	0.732	0	0	no	0	0	no	no	NA	NA	NA	NA
GCA_013888235.1_ASM1388823v1	CP057602.1	3524	not_detected	0	not_applicable	gplas	0	0	NA	0	NA	NA	not_applicable	not_applicable	no	0	0	no	no	NA	NA	NA	NA
GCA_013888615.1_ASM1388861v1	CP057606.1	89809	GCA_013888615.1_ASM1388861v1_bin_1	85835	85835	gplas	89229	0.993541849925954	0.956	85835	1	0.978	0	0	yes	0	0	no	no	NA	NA	NA	NA
GCA_013888615.1_ASM1388861v1	CP057607.1	2719	not_detected	0	not_applicable	gplas	2702	0.993747701360794	NA	0	NA	NA	not_applicable	not_applicable	no	0	0	no	no	NA	NA	NA	NA
GCA_013889395.1_ASM1388939v1	CP057613.1	89809	GCA_013889395.1_ASM1388939v1_bin_1	85835	85835	gplas	89229	0.993541849925954	0.956	85835	1	0.978	0	0	yes	0	0	no	no	NA	NA	NA	NA
GCA_013889395.1_ASM1388939v1	CP057614.1	2719	not_detected	0	not_applicable	gplas	2719	1	NA	0	NA	NA	not_applicable	not_applicable	no	0	0	no	no	NA	NA	NA	NA
GCA_013890395.1_ASM1389039v1	CP057622.1	116595	GCA_013890395.1_ASM1389039v1_bin_1	84138	84138	gplas	115535	0.990908701059222	0.722	84138	1	0.839	0	0	no	0	0	no	no	NA	NA	NA	NA
GCA_013890395.1_ASM1389039v1	CP057623.1	97938	GCA_013890395.1_ASM1389039v1_bin_3	97938	98015	gplas	97938	1	1	97938	0.999	0.999	0	0	yes	0	0	no	no	NA	NA	NA	NA
GCA_013890395.1_ASM1389039v1	CP057624.1	6647	not_detected	0	not_applicable	gplas	6515	0.980141417180683	NA	0	NA	NA	not_applicable	not_applicable	no	0	0	no	no	NA	NA	NA	NA
GCA_013890395.1_ASM1389039v1	CP057625.1	4671	not_detected	0	not_applicable	gplas	4539	0.971740526653821	NA	0	NA	NA	not_applicable	not_applicable	no	0	0	no	no	NA	NA	NA	NA
GCA_013890795.1_ASM1389079v1	CP057635.1	109773	GCA_013890795.1_ASM1389079v1_bin_1	44965	45021	gplas	99446	0.905924043252895	0.41	44965	0.999	0.581	0	0	no	7	1	yes	yes	NA	NA	NA	NA
GCA_013891215.1_ASM1389121v1	CP057639.1	109773	GCA_013891215.1_ASM1389121v1_bin_1	46386	46467	gplas	101488	0.92452606743006	0.423	46386	0.998	0.594	0	0	no	7	1	yes	yes	NA	NA	NA	NA
GCA_013892855.1_ASM1389285v1	CP057666.1	130766	GCA_013892855.1_ASM1389285v1_bin_1	104510	104510	gplas	123500	0.944435097808299	0.799	104510	1	0.888	0	0	no	0	0	no	no	NA	NA	NA	NA
GCA_013892855.1_ASM1389285v1	CP057667.1	6930	not_detected	0	not_applicable	gplas	6542	0.944011544011544	NA	0	NA	NA	not_applicable	not_applicable	no	0	0	no	no	NA	NA	NA	NA
GCA_013892855.1_ASM1389285v1	CP057668.1	6230	not_detected	0	not_applicable	gplas	6010	0.964686998394864	NA	0	NA	NA	not_applicable	not_applicable	no	0	0	no	no	NA	NA	NA	NA
GCA_013893255.1_ASM1389325v1	CP057674.1	116753	GCA_013893255.1_ASM1389325v1_bin_1	103022	103022	gplas	112492	0.963504149786301	0.882	103022	1	0.937	0	0	no	0	0	no	no	NA	NA	NA	NA
GCA_013893255.1_ASM1389325v1	CP057674.1	116753	GCA_013893255.1_ASM1389325v1_bin_3	5449	5449	gplas	112492	0.963504149786301	0.047	5449	1	0.09	0	0	no	0	0	no	no	NA	NA	NA	NA
GCA_013893255.1_ASM1389325v1	CP057675.1	5686	not_detected	0	not_applicable	gplas	5550	0.9760816039395	NA	0	NA	NA	not_applicable	not_applicable	no	0	0	no	no	NA	NA	NA	NA
GCA_013893255.1_ASM1389325v1	CP057676.1	4073	not_detected	0	not_applicable	gplas	3940	0.967345936656028	NA	0	NA	NA	not_applicable	not_applicable	no	0	0	no	no	NA	NA	NA	NA
GCA_013893495.1_ASM1389349v1	CP057678.1	143708	GCA_013893495.1_ASM1389349v1_bin_1	133318	133464	gplas	142338	0.990466779859159	0.928	133318	0.999	0.962	0	0	yes	0	0	no	no	NA	NA	NA	NA
GCA_013893495.1_ASM1389349v1	CP057679.1	6760	not_detected	0	not_applicable	gplas	6484	0.959171597633136	NA	0	NA	NA	not_applicable	not_applicable	no	0	0	no	no	NA	NA	NA	NA
GCA_013893495.1_ASM1389349v1	CP057680.1	2590	not_detected	0	not_applicable	gplas	1722	0.664864864864865	NA	0	NA	NA	not_applicable	not_applicable	no	0	0	no	no	NA	NA	NA	NA
GCA_013893695.1_ASM1389369v1	CP057685.1	112153	not_detected	0	not_applicable	gplas	112153	1	NA	0	NA	NA	not_applicable	not_applicable	no	0	0	no	no	NA	NA	NA	NA
GCA_013895455.1_ASM1389545v1	CP057714.1	221175	GCA_013895455.1_ASM1389545v1_bin_2	17533	17533	gplas	212547	0.96099016615802	0.079	17533	1	0.146	0	0	no	7	1	yes	yes	1	1	7	0.142857142857143
GCA_013895455.1_ASM1389545v1	CP057715.1	76639	GCA_013895455.1_ASM1389545v1_bin_1	37677	37677	gplas	70616	0.921410769973512	0.492	37677	1	0.66	0	0	no	0	0	no	no	NA	NA	NA	NA
GCA_013895455.1_ASM1389545v1	CP057716.1	69882	not_detected	0	not_applicable	gplas	69443	0.993717981740649	NA	0	NA	NA	not_applicable	not_applicable	no	0	0	no	no	NA	NA	NA	NA
GCA_013898135.1_ASM1389813v1	CP057779.1	73457	GCA_013898135.1_ASM1389813v1_bin_3	10688	10688	gplas	69974	0.952584505220741	0.146	10688	1	0.255	0	0	no	0	0	no	no	NA	NA	NA	NA
GCA_013898135.1_ASM1389813v1	CP057779.1	73457	GCA_013898135.1_ASM1389813v1_bin_2	8755	8755	gplas	69974	0.952584505220741	0.119	8755	1	0.213	0	0	no	0	0	no	no	NA	NA	NA	NA
GCA_013898135.1_ASM1389813v1	CP057779.1	73457	GCA_013898135.1_ASM1389813v1_bin_1	40666	40666	gplas	69974	0.952584505220741	0.554	40666	1	0.713	0	0	no	0	0	no	no	NA	NA	NA	NA
GCA_013898135.1_ASM1389813v1	CP057780.1	41696	GCA_013898135.1_ASM1389813v1_bin_5	41696	41773	gplas	41696	1	1	41696	0.998	0.999	0	0	yes	0	0	no	no	NA	NA	NA	NA
GCA_013898135.1_ASM1389813v1	CP057781.1	6930	not_detected	0	not_applicable	gplas	6930	1	NA	0	NA	NA	not_applicable	not_applicable	no	0	0	no	no	NA	NA	NA	NA
GCA_013898915.1_ASM1389891v1	CP057803.1	48915	GCA_013898915.1_ASM1389891v1_bin_1	46202	46202	gplas	47979	0.980864765409384	0.945	46202	1	0.972	0	0	yes	0	0	no	no	NA	NA	NA	NA
GCA_013899075.1_ASM1389907v1	CP057832.1	92366	not_detected	0	not_applicable	gplas	91074	0.986012168979928	NA	0	NA	NA	not_applicable	not_applicable	no	0	0	no	no	NA	NA	NA	NA
GCA_013899145.1_ASM1389914v1	CP057844.1	131379	GCA_013899145.1_ASM1389914v1_bin_1	90101	158446	gplas	116729	0.888490550240145	0.686	90101	0.569	0.622	1144	0.00722012546861391	no	0	0	no	no	NA	NA	NA	NA
GCA_013899145.1_ASM1389914v1	CP057845.1	95217	GCA_013899145.1_ASM1389914v1_bin_1	67136	158446	gplas	89598	0.94098742871546	0.705	67136	0.424	0.53	1144	0.00722012546861391	no	0	0	no	no	NA	NA	NA	NA
GCA_013899145.1_ASM1389914v1	CP057846.1	91303	GCA_013899145.1_ASM1389914v1_bin_2	46713	46827	gplas	86171	0.943791551208613	0.512	46713	0.998	0.677	0	0	no	1	0	yes	no	1	1	1	1
GCA_013899145.1_ASM1389914v1	CP057847.1	6668	GCA_013899145.1_ASM1389914v1_bin_3	6668	6745	gplas	6668	1	1	6668	0.989	0.994	0	0	yes	0	0	no	no	NA	NA	NA	NA
GCA_013899145.1_ASM1389914v1	CP057848.1	6230	GCA_013899145.1_ASM1389914v1_bin_4	6230	6307	gplas	6230	1	1	6230	0.988	0.994	0	0	yes	0	0	no	no	NA	NA	NA	NA
GCA_013899165.1_ASM1389916v1	CP057840.1	104712	GCA_013899165.1_ASM1389916v1_bin_1	100116	100140	gplas	103376	0.987241194896478	0.956	100116	1	0.978	0	0	yes	9	0	yes	no	8	8	9	0.888888888888889
GCA_013899185.1_ASM1389918v1	CP057842.1	104712	GCA_013899185.1_ASM1389918v1_bin_1	102186	102210	gplas	103376	0.987241194896478	0.976	102186	1	0.988	0	0	yes	9	0	yes	no	9	9	9	1
GCA_013899605.1_ASM1389960v1	CP057886.1	104067	GCA_013899605.1_ASM1389960v1_bin_1	75455	75455	gplas	99403	0.955182718825372	0.725	75455	1	0.841	0	0	no	0	0	no	no	NA	NA	NA	NA
GCA_013899605.1_ASM1389960v1	CP057887.1	4671	GCA_013899605.1_ASM1389960v1_bin_3	4671	4748	gplas	4671	1	1	4671	0.984	0.992	0	0	yes	0	0	no	no	NA	NA	NA	NA
GCA_013899725.1_ASM1389972v1	CP057902.1	195368	GCA_013899725.1_ASM1389972v1_bin_1	96575	96763	gplas	174833	0.894890667867819	0.494	96575	0.998	0.661	0	0	no	0	0	no	no	NA	NA	NA	NA
GCA_013899725.1_ASM1389972v1	CP057903.1	63800	GCA_013899725.1_ASM1389972v1_bin_3	4296	4346	gplas	59031	0.92525078369906	0.067	4296	0.988	0.125	0	0	no	0	0	no	no	NA	NA	NA	NA
GCA_013899725.1_ASM1389972v1	CP057904.1	32598	GCA_013899725.1_ASM1389972v1_bin_2	32598	32720	gplas	32598	1	1	32598	0.996	0.998	0	0	yes	0	0	no	no	NA	NA	NA	NA
GCA_013899825.1_ASM1389982v1	CP057917.1	99864	GCA_013899825.1_ASM1389982v1_bin_1	43821	43821	gplas	98091	0.982245854361932	0.439	43821	1	0.61	0	0	no	0	0	no	no	NA	NA	NA	NA
GCA_013899985.1_ASM1389998v1	CP057947.1	102634	GCA_013899985.1_ASM1389998v1_bin_1	72694	72732	gplas	99758	0.971978096926944	0.708	72694	0.999	0.829	0	0	no	0	0	no	no	NA	NA	NA	NA
GCA_013899985.1_ASM1389998v1	CP057948.1	58530	not_detected	0	not_applicable	gplas	57876	0.988826242952332	NA	0	NA	NA	not_applicable	not_applicable	no	0	0	no	no	NA	NA	NA	NA
GCA_013899985.1_ASM1389998v1	CP057949.1	4924	not_detected	0	not_applicable	gplas	4922	0.999593826157595	NA	0	NA	NA	not_applicable	not_applicable	no	0	0	no	no	NA	NA	NA	NA
GCA_013899985.1_ASM1389998v1	CP057950.1	4612	not_detected	0	not_applicable	gplas	4612	1	NA	0	NA	NA	not_applicable	not_applicable	no	0	0	no	no	NA	NA	NA	NA
GCA_013900005.1_ASM1390000v1	CP057943.1	145571	GCA_013900005.1_ASM1390000v1_bin_1	66951	145699	gplas	125989	0.865481448914962	0.46	66951	0.46	0.46	1658	0.0113796251175368	no	0	0	no	no	NA	NA	NA	NA
GCA_013900005.1_ASM1390000v1	CP057944.1	92742	GCA_013900005.1_ASM1390000v1_bin_1	77015	145699	gplas	84157	0.907431368743396	0.83	77015	0.529	0.646	1658	0.0113796251175368	no	0	0	no	no	NA	NA	NA	NA
GCA_013900005.1_ASM1390000v1	CP057945.1	4612	not_detected	0	not_applicable	gplas	4612	1	NA	0	NA	NA	not_applicable	not_applicable	no	0	0	no	no	NA	NA	NA	NA
GCA_013900025.1_ASM1390002v1	CP057952.1	156576	GCA_013900025.1_ASM1390002v1_bin_1	96499	96499	gplas	152001	0.970780962599632	0.616	96499	1	0.762	0	0	no	0	0	no	no	NA	NA	NA	NA
GCA_013900205.1_ASM1390020v1	CP057971.1	140458	GCA_013900205.1_ASM1390020v1_bin_1	56575	157813	gplas	134506	0.957624343220037	0.403	56575	0.358	0.379	0	0	no	0	0	no	no	NA	NA	NA	NA
GCA_013900205.1_ASM1390020v1	CP057972.1	110406	GCA_013900205.1_ASM1390020v1_bin_1	101159	157813	gplas	108146	0.97953009800192	0.916	101159	0.641	0.754	0	0	no	0	0	no	no	NA	NA	NA	NA
GCA_013900245.1_ASM1390024v1	CP057976.1	93585	GCA_013900245.1_ASM1390024v1_bin_1	93585	93646	gplas	93585	1	1	93585	0.999	0.999	0	0	yes	0	0	no	no	NA	NA	NA	NA
GCA_013900245.1_ASM1390024v1	CP057977.1	90123	GCA_013900245.1_ASM1390024v1_bin_2	83515	83651	gplas	89455	0.99258790763734	0.927	83515	0.998	0.961	0	0	yes	3	0	yes	no	3	3	3	1
GCA_013922765.1_ASM1392276v1	CP058020.1	143696	GCA_013922765.1_ASM1392276v1_bin_1	133308	135466	gplas	142328	0.990479902015366	0.928	133308	0.984	0.955	2012	0.0148524352974178	yes	0	0	no	no	NA	NA	NA	NA
GCA_013922765.1_ASM1392276v1	CP058021.1	95289	not_detected	0	not_applicable	gplas	93119	0.977227172076525	NA	0	NA	NA	not_applicable	not_applicable	no	0	0	no	no	NA	NA	NA	NA
GCA_013922765.1_ASM1392276v1	CP058022.1	8873	not_detected	0	not_applicable	gplas	8873	1	NA	0	NA	NA	not_applicable	not_applicable	no	0	0	no	no	NA	NA	NA	NA
GCA_013923405.1_ASM1392340v1	CP058071.1	116772	GCA_013923405.1_ASM1392340v1_bin_1	95381	95425	gplas	106155	0.909079231322577	0.817	95381	1	0.899	0	0	no	4	1	yes	yes	1	1	4	0.25
GCA_013996855.1_ASM1399685v1	CP058032.1	120225	GCA_013996855.1_ASM1399685v1_bin_1	112219	114001	gplas	115056	0.957005614472863	0.933	112219	0.984	0.958	1782	0.0156314418294576	yes	0	0	no	no	NA	NA	NA	NA
GCA_013996855.1_ASM1399685v1	CP058033.1	6768	not_detected	0	not_applicable	gplas	6768	1	NA	0	NA	NA	not_applicable	not_applicable	no	2	0	yes	no	NA	NA	2	NA
GCA_013996855.1_ASM1399685v1	CP058034.1	4664	not_detected	0	not_applicable	gplas	4298	0.921526586620926	NA	0	NA	NA	not_applicable	not_applicable	no	0	0	no	no	NA	NA	NA	NA
GCA_013996855.1_ASM1399685v1	CP058035.1	2460	not_detected	0	not_applicable	gplas	2456	0.998373983739837	NA	0	NA	NA	not_applicable	not_applicable	no	0	0	no	no	NA	NA	NA	NA
GCA_014058445.1_ASM1405844v1	CP058683.1	92578	GCA_014058445.1_ASM1405844v1_bin_2	49836	57101	gplas	76869	0.830316057810711	0.538	49836	0.873	0.666	7265	0.127230696485175	no	0	0	no	no	NA	NA	NA	NA
GCA_014058445.1_ASM1405844v1	CP058684.1	89589	GCA_014058445.1_ASM1405844v1_bin_1	60504	73233	gplas	82860	0.924890332518501	0.675	60504	0.826	0.743	12596	0.171998962216487	no	0	0	no	no	NA	NA	NA	NA
GCA_014058445.1_ASM1405844v1	CP058685.1	34196	not_detected	0	not_applicable	gplas	33943	0.992601473856591	NA	0	NA	NA	not_applicable	not_applicable	no	0	0	no	no	NA	NA	NA	NA
GCA_014058445.1_ASM1405844v1	CP058686.1	6715	GCA_014058445.1_ASM1405844v1_bin_4	2037	2037	gplas	6619	0.985703648548027	0.303	2037	1	0.465	0	0	no	0	0	no	no	NA	NA	NA	NA
GCA_014058445.1_ASM1405844v1	CP058687.1	4742	GCA_014058445.1_ASM1405844v1_bin_3	4613	4697	gplas	4613	0.972796288485871	0.973	4613	0.982	0.977	0	0	yes	0	0	no	no	NA	NA	NA	NA
GCA_014058445.1_ASM1405844v1	CP058688.1	2784	not_detected	0	not_applicable	gplas	2687	0.965158045977011	NA	0	NA	NA	not_applicable	not_applicable	no	0	0	no	no	NA	NA	NA	NA
GCA_014108945.1_ASM1410894v1	CP058015.1	100878	GCA_014108945.1_ASM1410894v1_bin_1	83069	141163	gplas	90812	0.900216102619005	0.823	83069	0.588	0.686	0	0	no	0	0	no	no	NA	NA	NA	NA
GCA_014108945.1_ASM1410894v1	CP058016.1	96304	GCA_014108945.1_ASM1410894v1_bin_1	58024	141163	gplas	87460	0.9081658082738	0.603	58024	0.411	0.489	0	0	no	0	0	no	no	NA	NA	NA	NA
GCA_014108945.1_ASM1410894v1	CP058017.1	35166	not_detected	0	not_applicable	gplas	35166	1	NA	0	NA	NA	not_applicable	not_applicable	no	0	0	no	no	NA	NA	NA	NA
GCA_014108945.1_ASM1410894v1	CP058018.1	3081	GCA_014108945.1_ASM1410894v1_bin_2	2899	3158	gplas	2899	0.940928270042194	0.941	2899	0.918	0.929	0	0	no	0	0	no	no	NA	NA	NA	NA
GCA_014109005.1_ASM1410900v1	CP058047.1	50161	GCA_014109005.1_ASM1410900v1_bin_1	17387	42162	gplas	43664	0.870477063854389	0.347	17387	0.412	0.377	9380	0.222475214648261	no	1	0	yes	no	1	6	1	1
GCA_014109005.1_ASM1410900v1	CP058048.1	44007	GCA_014109005.1_ASM1410900v1_bin_1	15395	42162	gplas	36542	0.830367896016543	0.35	15395	0.365	0.357	9380	0.222475214648261	no	7	1	yes	yes	5	6	7	0.714285714285714
GCA_014109005.1_ASM1410900v1	CP058049.1	8136	GCA_014109005.1_ASM1410900v1_bin_2	7221	7539	gplas	7221	0.887536873156342	0.888	7221	0.958	0.922	0	0	no	0	0	no	no	NA	NA	NA	NA
GCA_014109005.1_ASM1410900v1	CP058050.1	2460	GCA_014109005.1_ASM1410900v1_bin_3	2460	2537	gplas	2460	1	1	2460	0.97	0.985	0	0	yes	0	0	no	no	NA	NA	NA	NA
GCA_014109005.1_ASM1410900v1	CP058051.1	1552	not_detected	0	not_applicable	gplas	0	0	NA	0	NA	NA	not_applicable	not_applicable	no	0	0	no	no	NA	NA	NA	NA
GCA_014109025.1_ASM1410902v1	CP058053.1	50161	GCA_014109025.1_ASM1410902v1_bin_2	10972	15987	gplas	43784	0.872869360658679	0.219	10972	0.686	0.332	0	0	no	1	0	yes	no	1	1	1	1
GCA_014109025.1_ASM1410902v1	CP058053.1	50161	GCA_014109025.1_ASM1410902v1_bin_3	12603	12603	gplas	43784	0.872869360658679	0.251	12603	1	0.401	0	0	no	1	0	yes	no	NA	NA	NA	NA
GCA_014109025.1_ASM1410902v1	CP058054.1	44007	GCA_014109025.1_ASM1410902v1_bin_2	5015	15987	gplas	36542	0.830367896016543	0.114	5015	0.314	0.167	0	0	no	7	1	yes	yes	NA	NA	NA	NA
GCA_014109025.1_ASM1410902v1	CP058054.1	44007	GCA_014109025.1_ASM1410902v1_bin_1	15395	15395	gplas	36542	0.830367896016543	0.35	15395	1	0.519	0	0	no	7	1	yes	yes	5	5	7	0.714285714285714
GCA_014109025.1_ASM1410902v1	CP058055.1	8136	not_detected	0	not_applicable	gplas	7539	0.926622418879056	NA	0	NA	NA	not_applicable	not_applicable	no	0	0	no	no	NA	NA	NA	NA
GCA_014109025.1_ASM1410902v1	CP058056.1	2460	not_detected	0	not_applicable	gplas	2460	1	NA	0	NA	NA	not_applicable	not_applicable	no	0	0	no	no	NA	NA	NA	NA
GCA_014109065.1_ASM1410906v1	CP058075.1	113309	GCA_014109065.1_ASM1410906v1_bin_1	52054	52054	gplas	103405	0.912592997908374	0.459	52054	1	0.629	0	0	no	3	1	yes	yes	3	3	3	1
GCA_014109065.1_ASM1410906v1	CP058075.1	113309	GCA_014109065.1_ASM1410906v1_bin_2	48815	48859	gplas	103405	0.912592997908374	0.431	48815	0.999	0.602	0	0	no	3	1	yes	yes	NA	NA	NA	NA
GCA_014109085.1_ASM1410908v1	CP058073.1	116772	GCA_014109085.1_ASM1410908v1_bin_1	50863	50863	gplas	106155	0.909079231322577	0.436	50863	1	0.607	0	0	no	4	1	yes	yes	2	2	4	0.5
GCA_014109085.1_ASM1410908v1	CP058073.1	116772	GCA_014109085.1_ASM1410908v1_bin_2	48815	48859	gplas	106155	0.909079231322577	0.418	48815	0.999	0.589	0	0	no	4	1	yes	yes	NA	NA	NA	NA
GCA_014109105.1_ASM1410910v1	CP058077.1	116772	GCA_014109105.1_ASM1410910v1_bin_1	99535	99579	gplas	106012	0.90785462268352	0.852	99535	1	0.92	0	0	no	4	1	yes	yes	2	2	4	0.5
GCA_014109125.1_ASM1410912v1	CP058079.1	116772	GCA_014109125.1_ASM1410912v1_bin_1	47756	47756	gplas	106155	0.909079231322577	0.409	47756	1	0.581	0	0	no	4	1	yes	yes	2	2	4	0.5
GCA_014109125.1_ASM1410912v1	CP058079.1	116772	GCA_014109125.1_ASM1410912v1_bin_2	48815	48859	gplas	106155	0.909079231322577	0.418	48815	0.999	0.589	0	0	no	4	1	yes	yes	NA	NA	NA	NA
GCA_014109625.1_ASM1410962v1	CP058091.1	90645	GCA_014109625.1_ASM1410962v1_bin_1	67078	75108	gplas	81729	0.90163825914281	0.74	67078	0.893	0.809	0	0	no	0	0	no	no	NA	NA	NA	NA
GCA_014109625.1_ASM1410962v1	CP058092.1	74290	GCA_014109625.1_ASM1410962v1_bin_1	7971	75108	gplas	68337	0.919868084533585	0.107	7971	0.106	0.106	0	0	no	0	0	no	no	NA	NA	NA	NA
GCA_014109665.1_ASM1410966v1	CP058105.1	143511	GCA_014109665.1_ASM1410966v1_bin_1	96803	96961	gplas	140144	0.976538383817268	0.675	96803	0.998	0.805	0	0	no	0	0	no	no	NA	NA	NA	NA
GCA_014109665.1_ASM1410966v1	CP058106.1	6230	not_detected	0	not_applicable	gplas	6220	0.998394863563403	NA	0	NA	NA	not_applicable	not_applicable	no	0	0	no	no	NA	NA	NA	NA
GCA_014109665.1_ASM1410966v1	CP058107.1	5682	not_detected	0	not_applicable	gplas	5682	1	NA	0	NA	NA	not_applicable	not_applicable	no	0	0	no	no	NA	NA	NA	NA
GCA_014109665.1_ASM1410966v1	CP058108.1	5569	GCA_014109665.1_ASM1410966v1_bin_2	5569	5646	gplas	5569	1	1	5569	0.986	0.993	0	0	yes	0	0	no	no	NA	NA	NA	NA
GCA_014109665.1_ASM1410966v1	CP058109.1	2590	not_detected	0	not_applicable	gplas	1020	0.393822393822394	NA	0	NA	NA	not_applicable	not_applicable	no	0	0	no	no	NA	NA	NA	NA
GCA_014109665.1_ASM1410966v1	CP058110.1	1551	GCA_014109665.1_ASM1410966v1_bin_3	1541	1628	gplas	1541	0.993552546744036	0.994	1541	0.947	0.97	0	0	yes	0	0	no	no	NA	NA	NA	NA
GCA_014109665.1_ASM1410966v1	CP058111.1	1306	not_detected	0	not_applicable	gplas	0	0	NA	0	NA	NA	not_applicable	not_applicable	no	0	0	no	no	NA	NA	NA	NA
GCA_014117345.1_ASM1411734v1	CP059842.1	5218	not_detected	0	not_applicable	gplas	5218	1	NA	0	NA	NA	not_applicable	not_applicable	no	0	0	no	no	NA	NA	NA	NA
GCA_014117345.1_ASM1411734v1	CP059841.1	96603	GCA_014117345.1_ASM1411734v1_bin_1	88933	92540	gplas	88933	0.920602879827749	0.921	88933	0.961	0.941	3607	0.0389777393559542	no	0	0	no	no	NA	NA	NA	NA
GCA_014131495.1_ASM1413149v1	CP048854.1	123784	GCA_014131495.1_ASM1413149v1_bin_1	38323	42014	gplas	111601	0.901578556194662	0.31	38323	0.912	0.463	3676	0.0874946446422621	no	0	0	no	no	NA	NA	NA	NA
GCA_014131495.1_ASM1413149v1	CP048854.1	123784	GCA_014131495.1_ASM1413149v1_bin_2	32389	32456	gplas	111601	0.901578556194662	0.262	32389	0.998	0.415	0	0	no	0	0	no	no	NA	NA	NA	NA
GCA_014131495.1_ASM1413149v1	CP048854.1	123784	GCA_014131495.1_ASM1413149v1_bin_3	25436	26978	gplas	111601	0.901578556194662	0.205	25436	0.943	0.337	1542	0.0571576840388465	no	0	0	no	no	NA	NA	NA	NA
GCA_014131515.1_ASM1413151v1	CP048856.1	70473	not_detected	0	not_applicable	gplas	67055	0.951499155705022	NA	0	NA	NA	not_applicable	not_applicable	no	0	0	no	no	NA	NA	NA	NA
GCA_014131535.1_ASM1413153v1	CP048858.1	113819	GCA_014131535.1_ASM1413153v1_bin_1	97814	99520	gplas	107302	0.942742424375544	0.859	97814	0.983	0.917	1706	0.0171422829581994	no	0	0	no	no	NA	NA	NA	NA
GCA_014131535.1_ASM1413153v1	CP048859.1	5219	not_detected	0	not_applicable	gplas	4808	0.921249281471546	NA	0	NA	NA	not_applicable	not_applicable	no	0	0	no	no	NA	NA	NA	NA
GCA_014131555.1_ASM1413155v1	CP048861.1	124387	GCA_014131555.1_ASM1413155v1_bin_1	71651	78410	gplas	114622	0.921495011536575	0.576	71651	0.914	0.707	6692	0.085346256854993	no	8	0	yes	no	4	4	8	0.5
GCA_014131555.1_ASM1413155v1	CP048862.1	1546	not_detected	0	not_applicable	gplas	1513	0.978654592496766	NA	0	NA	NA	not_applicable	not_applicable	no	0	0	no	no	NA	NA	NA	NA
GCA_014131575.1_ASM1413157v1	CP048864.1	4593	GCA_014131575.1_ASM1413157v1_bin_2	4593	4670	gplas	4593	1	1	4593	0.984	0.992	0	0	yes	0	0	no	no	NA	NA	NA	NA
GCA_014131595.1_ASM1413159v1	CP048866.1	137220	GCA_014131595.1_ASM1413159v1_bin_1	39992	40097	gplas	127616	0.930010202594374	0.291	39992	0.997	0.451	0	0	no	2	0	yes	no	NA	NA	NA	NA
GCA_014131595.1_ASM1413159v1	CP048866.1	137220	GCA_014131595.1_ASM1413159v1_bin_2	13370	15076	gplas	127616	0.930010202594374	0.097	13370	0.887	0.175	1706	0.113159989387105	no	2	0	yes	no	NA	NA	NA	NA
GCA_014131595.1_ASM1413159v1	CP048866.1	137220	GCA_014131595.1_ASM1413159v1_bin_3	26892	26893	gplas	127616	0.930010202594374	0.196	26892	1	0.328	0	0	no	2	0	yes	no	NA	NA	NA	NA
GCA_014131615.1_ASM1413161v1	CP048868.1	179302	GCA_014131615.1_ASM1413161v1_bin_1	59431	75476	gplas	133616	0.745200834346522	0.331	59431	0.787	0.466	15977	0.211683184058509	no	3	0	yes	no	NA	NA	NA	NA
GCA_014131615.1_ASM1413161v1	CP048868.1	179302	GCA_014131615.1_ASM1413161v1_bin_3	65566	70550	gplas	133616	0.745200834346522	0.366	65566	0.929	0.525	4984	0.0706449326718639	no	3	0	yes	no	3	4	3	1
GCA_014131615.1_ASM1413161v1	CP048869.1	65184	GCA_014131615.1_ASM1413161v1_bin_2	48401	51537	gplas	50656	0.77712322042219	0.743	48401	0.939	0.83	2935	0.0569493761763393	no	0	0	no	no	NA	NA	NA	NA
GCA_014131635.1_ASM1413163v1	CP048871.1	120607	GCA_014131635.1_ASM1413163v1_bin_1	99002	103320	gplas	111620	0.925485253758074	0.821	99002	0.958	0.884	4309	0.0417053813395277	no	0	0	no	no	NA	NA	NA	NA
GCA_014131635.1_ASM1413163v1	CP048872.1	5153	GCA_014131635.1_ASM1413163v1_bin_2	5153	5230	gplas	5153	1	1	5153	0.985	0.992	0	0	yes	0	0	no	no	NA	NA	NA	NA
GCA_014131655.1_ASM1413165v1	CP048874.1	5163	not_detected	0	not_applicable	gplas	5163	1	NA	0	NA	NA	not_applicable	not_applicable	no	0	0	no	no	NA	NA	NA	NA
GCA_014168595.1_ASM1416859v1	AP021915.1	158754	GCA_014168595.1_ASM1416859v1_bin_1	104022	141223	gplas	148624	0.936190584174257	0.655	104022	0.737	0.694	7200	0.0509831967880586	no	12	1	yes	yes	4	4	12	0.333333333333333
GCA_014168595.1_ASM1416859v1	AP021916.1	87852	GCA_014168595.1_ASM1416859v1_bin_1	29937	141223	gplas	86533	0.984986113008241	0.341	29937	0.212	0.261	7200	0.0509831967880586	no	0	0	no	no	NA	NA	NA	NA
GCA_014168675.1_ASM1416867v1	AP021934.1	105973	GCA_014168675.1_ASM1416867v1_bin_1	83781	83845	gplas	101335	0.956234135109887	0.791	83781	0.999	0.883	0	0	no	6	1	yes	yes	5	5	6	0.833333333333333
GCA_014168735.1_ASM1416873v1	AP021945.1	103781	GCA_014168735.1_ASM1416873v1_bin_1	31402	31455	gplas	102056	0.983378460411829	0.303	31402	0.998	0.465	0	0	no	1	1	yes	yes	1	1	1	1
GCA_014168755.1_ASM1416875v1	AP021947.1	210712	GCA_014168755.1_ASM1416875v1_bin_2	33407	119585	gplas	190236	0.902824708607009	0.159	33407	0.279	0.203	1691	0.0141405694694151	no	0	0	no	no	NA	NA	NA	NA
GCA_014168755.1_ASM1416875v1	AP021947.1	210712	GCA_014168755.1_ASM1416875v1_bin_3	86357	106034	gplas	190236	0.902824708607009	0.41	86357	0.814	0.545	19567	0.184535149103118	no	0	0	no	no	NA	NA	NA	NA
GCA_014168755.1_ASM1416875v1	AP021947.1	210712	GCA_014168755.1_ASM1416875v1_bin_1	4103	10303	gplas	190236	0.902824708607009	0.019	4103	0.398	0.036	6199	0.601669416674755	no	0	0	no	no	NA	NA	NA	NA
GCA_014168755.1_ASM1416875v1	AP021948.1	91630	GCA_014168755.1_ASM1416875v1_bin_2	84413	119585	gplas	88664	0.967630688639092	0.921	84413	0.706	0.799	1691	0.0141405694694151	no	1	1	yes	yes	NA	NA	NA	NA
GCA_014168755.1_ASM1416875v1	AP021949.1	4073	GCA_014168755.1_ASM1416875v1_bin_5	4073	4150	gplas	4073	1	1	4073	0.981	0.99	0	0	yes	0	0	no	no	NA	NA	NA	NA
GCA_014168835.1_ASM1416883v1	AP021999.1	105864	GCA_014168835.1_ASM1416883v1_bin_1	81289	84326	gplas	93696	0.885060077080027	0.768	81289	0.964	0.855	2840	0.0336788179209259	no	1	1	yes	yes	1	1	1	1
GCA_014168835.1_ASM1416883v1	AP022000.1	6669	GCA_014168835.1_ASM1416883v1_bin_3	6669	6746	gplas	6669	1	1	6669	0.989	0.994	0	0	yes	0	0	no	no	NA	NA	NA	NA
GCA_014168835.1_ASM1416883v1	AP022001.1	5167	GCA_014168835.1_ASM1416883v1_bin_2	4045	4379	gplas	4045	0.782852719179408	0.783	4045	0.924	0.848	0	0	no	0	0	no	no	NA	NA	NA	NA
GCA_014168835.1_ASM1416883v1	AP022002.1	4087	not_detected	0	not_applicable	gplas	0	0	NA	0	NA	NA	not_applicable	not_applicable	no	0	0	no	no	NA	NA	NA	NA
GCA_014168855.1_ASM1416885v1	AP022004.1	131334	GCA_014168855.1_ASM1416885v1_bin_1	25321	32760	gplas	123895	0.943358155542358	0.193	25321	0.773	0.309	7439	0.227075702075702	no	0	0	no	no	NA	NA	NA	NA
GCA_014168855.1_ASM1416885v1	AP022004.1	131334	GCA_014168855.1_ASM1416885v1_bin_3	74125	74170	gplas	123895	0.943358155542358	0.564	74125	0.999	0.721	0	0	no	0	0	no	no	NA	NA	NA	NA
GCA_014168935.1_ASM1416893v1	AP022031.1	76037	GCA_014168935.1_ASM1416893v1_bin_1	67298	83349	gplas	72100	0.94822257585123	0.885	67298	0.807	0.844	15930	0.191124068675089	no	4	1	yes	yes	1	5	4	0.25
GCA_014168955.1_ASM1416895v1	AP022033.1	105867	GCA_014168955.1_ASM1416895v1_bin_1	27873	31426	gplas	94279	0.890541906354199	0.263	27873	0.887	0.406	3490	0.111054540826068	no	1	1	yes	yes	NA	NA	NA	NA
GCA_014168955.1_ASM1416895v1	AP022033.1	105867	GCA_014168955.1_ASM1416895v1_bin_2	36136	36136	gplas	94279	0.890541906354199	0.341	36136	1	0.509	0	0	no	1	1	yes	yes	NA	NA	NA	NA
GCA_014168955.1_ASM1416895v1	AP022033.1	105867	GCA_014168955.1_ASM1416895v1_bin_3	22689	22823	gplas	94279	0.890541906354199	0.214	22689	0.994	0.352	0	0	no	1	1	yes	yes	NA	NA	NA	NA
GCA_014168955.1_ASM1416895v1	AP022034.1	5167	GCA_014168955.1_ASM1416895v1_bin_4	4379	4379	gplas	4379	0.84749371008322	0.847	4379	1	0.917	0	0	no	0	0	no	no	NA	NA	NA	NA
GCA_014168955.1_ASM1416895v1	AP022035.1	4087	not_detected	0	not_applicable	gplas	3976	0.972840714460484	NA	0	NA	NA	not_applicable	not_applicable	no	0	0	no	no	NA	NA	NA	NA
GCA_014168975.1_ASM1416897v1	AP022037.1	88528	GCA_014168975.1_ASM1416897v1_bin_1	44164	44249	gplas	87605	0.98957392011567	0.499	44164	0.998	0.665	0	0	no	1	1	yes	yes	1	1	1	1
GCA_014169015.1_ASM1416901v1	AP022045.1	148598	GCA_014169015.1_ASM1416901v1_bin_1	32682	46924	gplas	130519	0.878336182182802	0.22	32682	0.696	0.334	14242	0.303512062057796	no	2	1	yes	yes	NA	NA	NA	NA
GCA_014169015.1_ASM1416901v1	AP022045.1	148598	GCA_014169015.1_ASM1416901v1_bin_2	64000	66859	gplas	130519	0.878336182182802	0.431	64000	0.957	0.594	0	0	no	2	1	yes	yes	NA	NA	NA	NA
GCA_014169015.1_ASM1416901v1	AP022045.1	148598	GCA_014169015.1_ASM1416901v1_bin_3	4171	4171	gplas	130519	0.878336182182802	0.028	4171	1	0.054	4171	1	no	2	1	yes	yes	2	2	2	1
GCA_014169015.1_ASM1416901v1	AP022046.1	5210	GCA_014169015.1_ASM1416901v1_bin_4	5210	5287	gplas	5210	1	1	5210	0.985	0.992	0	0	yes	0	0	no	no	NA	NA	NA	NA
GCA_014169015.1_ASM1416901v1	AP022047.1	5167	not_detected	0	not_applicable	gplas	4048	0.783433326882137	NA	0	NA	NA	not_applicable	not_applicable	no	0	0	no	no	NA	NA	NA	NA
GCA_014169015.1_ASM1416901v1	AP022048.1	3372	GCA_014169015.1_ASM1416901v1_bin_5	3157	3449	gplas	3157	0.936239620403321	0.936	3157	0.915	0.925	0	0	no	0	0	no	no	NA	NA	NA	NA
GCA_014169095.1_ASM1416909v1	AP022065.1	134864	GCA_014169095.1_ASM1416909v1_bin_1	44998	44998	gplas	110837	0.821842745284138	0.334	44998	1	0.501	0	0	no	9	1	yes	yes	8	8	9	0.888888888888889
GCA_014169095.1_ASM1416909v1	AP022065.1	134864	GCA_014169095.1_ASM1416909v1_bin_2	41316	46103	gplas	110837	0.821842745284138	0.306	41316	0.896	0.456	4787	0.103832722382491	no	9	1	yes	yes	NA	NA	NA	NA
GCA_014169095.1_ASM1416909v1	AP022065.1	134864	GCA_014169095.1_ASM1416909v1_bin_3	3303	87773	gplas	110837	0.821842745284138	0.024	3303	0.038	0.029	0	0	no	9	1	yes	yes	NA	NA	NA	NA
GCA_014169095.1_ASM1416909v1	AP022066.1	95805	GCA_014169095.1_ASM1416909v1_bin_3	84470	87773	gplas	87019	0.908292886592558	0.882	84470	0.962	0.92	0	0	no	0	0	no	no	NA	NA	NA	NA
GCA_014169095.1_ASM1416909v1	AP022067.1	5167	not_detected	0	not_applicable	gplas	4045	0.782852719179408	NA	0	NA	NA	not_applicable	not_applicable	no	0	0	no	no	NA	NA	NA	NA
GCA_014169095.1_ASM1416909v1	AP022068.1	4087	not_detected	0	not_applicable	gplas	0	0	NA	0	NA	NA	not_applicable	not_applicable	no	0	0	no	no	NA	NA	NA	NA
GCA_014169115.1_ASM1416911v1	AP022070.1	117617	GCA_014169115.1_ASM1416911v1_bin_1	70110	204991	gplas	87292	0.742171624850149	0.596	70110	0.342	0.435	7901	0.0385431555531706	no	13	1	yes	yes	7	7	13	0.538461538461538
GCA_014169115.1_ASM1416911v1	AP022071.1	84553	GCA_014169115.1_ASM1416911v1_bin_1	72420	204991	gplas	77038	0.91112083545232	0.857	72420	0.353	0.5	7901	0.0385431555531706	no	0	0	no	no	NA	NA	NA	NA
GCA_014169115.1_ASM1416911v1	AP022072.1	77891	GCA_014169115.1_ASM1416911v1_bin_1	54332	204991	gplas	61713	0.792299495448768	0.698	54332	0.265	0.384	7901	0.0385431555531706	no	0	0	no	no	NA	NA	NA	NA
GCA_014169115.1_ASM1416911v1	AP022073.1	5219	GCA_014169115.1_ASM1416911v1_bin_2	4851	5020	gplas	4851	0.929488407740947	0.929	4851	0.966	0.947	0	0	no	0	0	no	no	NA	NA	NA	NA
GCA_014169115.1_ASM1416911v1	AP022074.1	5167	not_detected	0	not_applicable	gplas	4048	0.783433326882137	NA	0	NA	NA	not_applicable	not_applicable	no	0	0	no	no	NA	NA	NA	NA
GCA_014169115.1_ASM1416911v1	AP022075.1	3272	GCA_014169115.1_ASM1416911v1_bin_3	3072	3072	gplas	3072	0.938875305623472	0.939	3072	1	0.969	0	0	yes	0	0	no	no	NA	NA	NA	NA
GCA_014169115.1_ASM1416911v1	AP022076.1	2100	not_detected	0	not_applicable	gplas	0	0	NA	0	NA	NA	not_applicable	not_applicable	no	0	0	no	no	NA	NA	NA	NA
GCA_014169155.1_ASM1416915v1	AP022096.1	158292	GCA_014169155.1_ASM1416915v1_bin_1	118629	177570	gplas	149867	0.946775579309125	0.749	118629	0.668	0.706	45354	0.255414766007772	no	1	0	yes	no	1	5	1	1
GCA_014169155.1_ASM1416915v1	AP022097.1	93398	GCA_014169155.1_ASM1416915v1_bin_1	13587	177570	gplas	83952	0.898862930683741	0.145	13587	0.077	0.101	45354	0.255414766007772	no	1	1	yes	yes	NA	NA	NA	NA
GCA_014169175.1_ASM1416917v1	AP022099.1	5344	not_detected	0	not_applicable	gplas	3659	0.684693113772455	NA	0	NA	NA	not_applicable	not_applicable	no	0	0	no	no	NA	NA	NA	NA
GCA_014169175.1_ASM1416917v1	AP022100.1	5167	not_detected	0	not_applicable	gplas	5167	1	NA	0	NA	NA	not_applicable	not_applicable	no	0	0	no	no	NA	NA	NA	NA
GCA_014169175.1_ASM1416917v1	AP022101.1	4063	not_detected	0	not_applicable	gplas	4063	1	NA	0	NA	NA	not_applicable	not_applicable	no	0	0	no	no	NA	NA	NA	NA
GCA_014169175.1_ASM1416917v1	AP022102.1	3855	not_detected	0	not_applicable	gplas	3855	1	NA	0	NA	NA	not_applicable	not_applicable	no	0	0	no	no	NA	NA	NA	NA
GCA_014169175.1_ASM1416917v1	AP022103.1	2188	not_detected	0	not_applicable	gplas	1733	0.792047531992687	NA	0	NA	NA	not_applicable	not_applicable	no	0	0	no	no	NA	NA	NA	NA
GCA_014169175.1_ASM1416917v1	AP022104.1	2088	not_detected	0	not_applicable	gplas	2088	1	NA	0	NA	NA	not_applicable	not_applicable	no	0	0	no	no	NA	NA	NA	NA
GCA_014169195.1_ASM1416919v1	AP022106.1	130869	GCA_014169195.1_ASM1416919v1_bin_1	105709	105713	gplas	120493	0.920714607737508	0.808	105709	1	0.894	0	0	no	1	0	yes	no	1	1	1	1
GCA_014169275.1_ASM1416927v1	AP022121.1	158291	GCA_014169275.1_ASM1416927v1_bin_1	101367	180101	gplas	149130	0.942125578838974	0.64	101367	0.563	0.599	1658	0.00920594555277317	no	1	0	yes	no	1	1	1	1
GCA_014169275.1_ASM1416927v1	AP022122.1	89476	GCA_014169275.1_ASM1416927v1_bin_1	76755	180101	gplas	81815	0.914379274889356	0.858	76755	0.426	0.569	1658	0.00920594555277317	no	1	1	yes	yes	NA	NA	NA	NA
GCA_014169275.1_ASM1416927v1	AP022123.1	7233	GCA_014169275.1_ASM1416927v1_bin_2	7161	7310	gplas	7161	0.990045624222314	0.99	7161	0.98	0.985	0	0	yes	0	0	no	no	NA	NA	NA	NA
GCA_014169275.1_ASM1416927v1	AP022124.1	4062	not_detected	0	not_applicable	gplas	3998	0.984244214672575	NA	0	NA	NA	not_applicable	not_applicable	no	0	0	no	no	NA	NA	NA	NA
GCA_014169275.1_ASM1416927v1	AP022125.1	2997	not_detected	0	not_applicable	gplas	2997	1	NA	0	NA	NA	not_applicable	not_applicable	no	0	0	no	no	NA	NA	NA	NA
GCA_014169395.1_ASM1416939v1	AP022160.1	94990	GCA_014169395.1_ASM1416939v1_bin_1	11731	25555	gplas	92845	0.977418675650068	0.123	11731	0.459	0.194	13758	0.538368225396204	no	0	0	no	no	NA	NA	NA	NA
GCA_014169415.1_ASM1416941v1	AP022162.1	147186	GCA_014169415.1_ASM1416941v1_bin_5	40560	40560	gplas	136539	0.927662957074722	0.276	40560	1	0.433	0	0	no	9	1	yes	yes	NA	NA	NA	NA
GCA_014169415.1_ASM1416941v1	AP022162.1	147186	GCA_014169415.1_ASM1416941v1_bin_4	36235	36407	gplas	136539	0.927662957074722	0.246	36235	0.995	0.394	0	0	no	9	1	yes	yes	NA	NA	NA	NA
GCA_014169415.1_ASM1416941v1	AP022162.1	147186	GCA_014169415.1_ASM1416941v1_bin_3	39086	40848	gplas	136539	0.927662957074722	0.266	39086	0.957	0.416	1691	0.0413973756365061	no	9	1	yes	yes	8	8	9	0.888888888888889
GCA_014169415.1_ASM1416941v1	AP022163.1	97833	GCA_014169415.1_ASM1416941v1_bin_1	96743	96743	gplas	96743	0.988858565105844	0.989	96743	1	0.994	0	0	yes	0	0	no	no	NA	NA	NA	NA
GCA_014169415.1_ASM1416941v1	AP022164.1	47454	GCA_014169415.1_ASM1416941v1_bin_2	47438	47438	gplas	47438	0.999662831373541	1	47438	1	1	0	0	yes	0	0	no	no	NA	NA	NA	NA
GCA_014169415.1_ASM1416941v1	AP022165.1	6647	GCA_014169415.1_ASM1416941v1_bin_6	4637	4637	gplas	6371	0.958477508650519	0.698	4637	1	0.822	0	0	no	0	0	no	no	NA	NA	NA	NA
GCA_014169415.1_ASM1416941v1	AP022166.1	5277	not_detected	0	not_applicable	gplas	4765	0.90297517528899	NA	0	NA	NA	not_applicable	not_applicable	no	0	0	no	no	NA	NA	NA	NA
GCA_014169415.1_ASM1416941v1	AP022167.1	5167	GCA_014169415.1_ASM1416941v1_bin_7	5167	5244	gplas	5167	1	1	5167	0.985	0.992	0	0	yes	0	0	no	no	NA	NA	NA	NA
GCA_014169415.1_ASM1416941v1	AP022168.1	4082	not_detected	0	not_applicable	gplas	2189	0.53625673689368	NA	0	NA	NA	not_applicable	not_applicable	no	0	0	no	no	NA	NA	NA	NA
GCA_014169415.1_ASM1416941v1	AP022169.1	4062	not_detected	0	not_applicable	gplas	2117	0.521171836533727	NA	0	NA	NA	not_applicable	not_applicable	no	0	0	no	no	NA	NA	NA	NA
GCA_014169415.1_ASM1416941v1	AP022170.1	2088	not_detected	0	not_applicable	gplas	2088	1	NA	0	NA	NA	not_applicable	not_applicable	no	0	0	no	no	NA	NA	NA	NA
GCA_014169435.1_ASM1416943v1	AP022172.1	187669	GCA_014169435.1_ASM1416943v1_bin_2	43108	44608	gplas	106280	0.566316226974087	0.23	43108	0.966	0.372	1500	0.0336262553802009	no	1	0	yes	no	NA	NA	NA	NA
GCA_014169435.1_ASM1416943v1	AP022172.1	187669	GCA_014169435.1_ASM1416943v1_bin_3	13202	13202	gplas	106280	0.566316226974087	0.07	13202	1	0.131	0	0	no	1	0	yes	no	NA	NA	NA	NA
GCA_014169455.1_ASM1416945v1	AP022174.1	94776	GCA_014169455.1_ASM1416945v1_bin_1	47072	132896	gplas	88819	0.937146534987761	0.497	47072	0.354	0.413	34267	0.257848242234529	no	1	1	yes	yes	NA	NA	NA	NA
GCA_014169455.1_ASM1416945v1	AP022175.1	63140	GCA_014169455.1_ASM1416945v1_bin_1	51388	132896	gplas	53776	0.851694646816598	0.814	51388	0.387	0.525	34267	0.257848242234529	no	0	0	no	no	NA	NA	NA	NA
GCA_014169455.1_ASM1416945v1	AP022176.1	4072	not_detected	0	not_applicable	gplas	4036	0.991159135559921	NA	0	NA	NA	not_applicable	not_applicable	no	0	0	no	no	NA	NA	NA	NA
GCA_014169475.1_ASM1416947v1	AP022178.1	123262	GCA_014169475.1_ASM1416947v1_bin_3	11064	11064	gplas	106795	0.866406516201262	0.09	11064	1	0.165	0	0	no	8	1	yes	yes	NA	NA	NA	NA
GCA_014169475.1_ASM1416947v1	AP022178.1	123262	GCA_014169475.1_ASM1416947v1_bin_1	4089	51533	gplas	106795	0.866406516201262	0.033	4089	0.079	0.047	1517	0.0294374478489512	no	8	1	yes	yes	1	1	8	0.125
GCA_014169475.1_ASM1416947v1	AP022178.1	123262	GCA_014169475.1_ASM1416947v1_bin_2	25730	25732	gplas	106795	0.866406516201262	0.209	25730	1	0.346	0	0	no	8	1	yes	yes	1	1	8	0.125
GCA_014169475.1_ASM1416947v1	AP022179.1	94173	GCA_014169475.1_ASM1416947v1_bin_1	45926	51533	gplas	87631	0.930532105805273	0.488	45926	0.891	0.631	1517	0.0294374478489512	no	0	0	no	no	NA	NA	NA	NA
GCA_014169475.1_ASM1416947v1	AP022180.1	5166	GCA_014169475.1_ASM1416947v1_bin_4	5166	5243	gplas	5166	1	1	5166	0.985	0.992	0	0	yes	0	0	no	no	NA	NA	NA	NA
GCA_014169475.1_ASM1416947v1	AP022181.1	4491	not_detected	0	not_applicable	gplas	4471	0.995546648853262	NA	0	NA	NA	not_applicable	not_applicable	no	0	0	no	no	NA	NA	NA	NA
GCA_014169475.1_ASM1416947v1	AP022182.1	4074	GCA_014169475.1_ASM1416947v1_bin_5	4074	4151	gplas	4074	1	1	4074	0.981	0.99	0	0	yes	0	0	no	no	NA	NA	NA	NA
GCA_014169575.1_ASM1416957v1	AP022208.1	214586	GCA_014169575.1_ASM1416957v1_bin_1	25157	25157	gplas	118197	0.550814125805039	0.117	25157	1	0.209	0	0	no	10	0	yes	no	NA	NA	NA	NA
GCA_014169575.1_ASM1416957v1	AP022208.1	214586	GCA_014169575.1_ASM1416957v1_bin_2	52087	53767	gplas	118197	0.550814125805039	0.243	52087	0.969	0.389	1601	0.0297766287871743	no	10	0	yes	no	5	5	10	0.5
GCA_014169575.1_ASM1416957v1	AP022209.1	5163	GCA_014169575.1_ASM1416957v1_bin_3	5163	5223	gplas	5163	1	1	5163	0.989	0.994	0	0	yes	0	0	no	no	NA	NA	NA	NA
GCA_014169575.1_ASM1416957v1	AP022210.1	4073	not_detected	0	not_applicable	gplas	4073	1	NA	0	NA	NA	not_applicable	not_applicable	no	0	0	no	no	NA	NA	NA	NA
GCA_014169575.1_ASM1416957v1	AP022211.1	4073	not_detected	0	not_applicable	gplas	0	0	NA	0	NA	NA	not_applicable	not_applicable	no	0	0	no	no	NA	NA	NA	NA
GCA_014169575.1_ASM1416957v1	AP022212.1	2089	not_detected	0	not_applicable	gplas	1953	0.934897079942556	NA	0	NA	NA	not_applicable	not_applicable	no	0	0	no	no	NA	NA	NA	NA
GCA_014169595.1_ASM1416959v1	AP022216.1	97682	GCA_014169595.1_ASM1416959v1_bin_1	97482	97482	gplas	97482	0.997952539874286	0.998	97482	1	0.999	0	0	yes	0	0	no	no	NA	NA	NA	NA
GCA_014169595.1_ASM1416959v1	AP022217.1	92332	not_detected	0	not_applicable	gplas	90929	0.984804834726855	NA	0	NA	NA	not_applicable	not_applicable	no	0	0	no	no	NA	NA	NA	NA
GCA_014169595.1_ASM1416959v1	AP022218.1	53216	not_detected	0	not_applicable	gplas	51884	0.97496993385448	NA	0	NA	NA	not_applicable	not_applicable	no	9	1	yes	yes	NA	NA	9	NA
GCA_014169595.1_ASM1416959v1	AP022219.1	4086	not_detected	0	not_applicable	gplas	0	0	NA	0	NA	NA	not_applicable	not_applicable	no	0	0	no	no	NA	NA	NA	NA
GCA_014169595.1_ASM1416959v1	AP022220.1	4027	not_detected	0	not_applicable	gplas	0	0	NA	0	NA	NA	not_applicable	not_applicable	no	0	0	no	no	NA	NA	NA	NA
GCA_014169615.1_ASM1416961v1	AP022223.1	139020	GCA_014169615.1_ASM1416961v1_bin_2	1215	81365	gplas	90140	0.648395914256941	0.009	1215	0.015	0.011	0	0	no	3	0	yes	no	NA	NA	NA	NA
GCA_014169615.1_ASM1416961v1	AP022223.1	139020	GCA_014169615.1_ASM1416961v1_bin_1	38664	38664	gplas	90140	0.648395914256941	0.278	38664	1	0.435	0	0	no	3	0	yes	no	2	2	3	0.666666666666667
GCA_014169615.1_ASM1416961v1	AP022223.1	139020	GCA_014169615.1_ASM1416961v1_bin_3	14578	21417	gplas	90140	0.648395914256941	0.105	14578	0.681	0.182	0	0	no	3	0	yes	no	NA	NA	NA	NA
GCA_014169615.1_ASM1416961v1	AP022224.1	87171	GCA_014169615.1_ASM1416961v1_bin_2	72899	81365	gplas	80553	0.924080256048456	0.836	72899	0.896	0.865	0	0	no	1	1	yes	yes	1	1	1	1
GCA_014169615.1_ASM1416961v1	AP022225.1	70764	GCA_014169615.1_ASM1416961v1_bin_2	7237	81365	gplas	32667	0.461633033745973	0.102	7237	0.089	0.095	0	0	no	0	0	no	no	NA	NA	NA	NA
GCA_014169615.1_ASM1416961v1	AP022225.1	70764	GCA_014169615.1_ASM1416961v1_bin_3	6839	21417	gplas	32667	0.461633033745973	0.097	6839	0.319	0.149	0	0	no	0	0	no	no	NA	NA	NA	NA
GCA_014169615.1_ASM1416961v1	AP022226.1	5631	not_detected	0	not_applicable	gplas	5631	1	NA	0	NA	NA	not_applicable	not_applicable	no	0	0	no	no	NA	NA	NA	NA
GCA_014169695.1_ASM1416969v1	AP022246.1	145389	GCA_014169695.1_ASM1416969v1_bin_1	49433	127607	gplas	89175	0.613354517879619	0.34	49433	0.387	0.362	19467	0.152554326956985	no	6	1	yes	yes	NA	NA	NA	NA
GCA_014169695.1_ASM1416969v1	AP022247.1	75556	GCA_014169695.1_ASM1416969v1_bin_1	18099	127607	gplas	28699	0.379837471544285	0.24	18099	0.142	0.178	19467	0.152554326956985	no	1	0	yes	no	NA	NA	NA	NA
GCA_014169695.1_ASM1416969v1	AP022248.1	49365	GCA_014169695.1_ASM1416969v1_bin_1	1874	127607	gplas	41610	0.842904892130052	0.038	1874	0.015	0.022	19467	0.152554326956985	no	6	1	yes	yes	1	6	6	0.166666666666667
GCA_014169695.1_ASM1416969v1	AP022249.1	46158	GCA_014169695.1_ASM1416969v1_bin_1	38624	127607	gplas	44376	0.961393474587287	0.837	38624	0.303	0.445	19467	0.152554326956985	no	2	0	yes	no	2	6	2	1
GCA_014169695.1_ASM1416969v1	AP022250.1	3274	not_detected	0	not_applicable	gplas	3274	1	NA	0	NA	NA	not_applicable	not_applicable	no	0	0	no	no	NA	NA	NA	NA
GCA_014169695.1_ASM1416969v1	AP022251.1	3067	GCA_014169695.1_ASM1416969v1_bin_2	3067	3144	gplas	3067	1	1	3067	0.976	0.988	0	0	yes	0	0	no	no	NA	NA	NA	NA
GCA_014169775.1_ASM1416977v1	AP022262.1	126588	GCA_014169775.1_ASM1416977v1_bin_2	2487	91780	gplas	115968	0.916105792018201	0.02	2487	0.027	0.023	0	0	no	0	0	no	no	NA	NA	NA	NA
GCA_014169775.1_ASM1416977v1	AP022262.1	126588	GCA_014169775.1_ASM1416977v1_bin_3	63114	68240	gplas	115968	0.916105792018201	0.499	63114	0.925	0.648	4986	0.0730656506447831	no	0	0	no	no	NA	NA	NA	NA
GCA_014169775.1_ASM1416977v1	AP022263.1	91233	GCA_014169775.1_ASM1416977v1_bin_2	89293	91780	gplas	89293	0.978735764471189	0.979	89293	0.973	0.976	0	0	yes	2	1	yes	yes	2	2	2	1
GCA_014169855.1_ASM1416985v1	AP022288.1	127169	GCA_014169855.1_ASM1416985v1_bin_1	61056	140050	gplas	116993	0.919980498391904	0.48	61056	0.436	0.457	12072	0.0861977865048197	no	1	0	yes	no	NA	NA	NA	NA
GCA_014169855.1_ASM1416985v1	AP022289.1	82448	GCA_014169855.1_ASM1416985v1_bin_1	66760	140050	gplas	75236	0.912526683485348	0.81	66760	0.477	0.6	12072	0.0861977865048197	no	0	0	no	no	NA	NA	NA	NA
GCA_014169895.1_ASM1416989v1	AP022296.1	105884	GCA_014169895.1_ASM1416989v1_bin_1	99131	99132	gplas	103073	0.973452079634317	0.936	99131	1	0.967	0	0	yes	2	1	yes	yes	2	2	2	1
GCA_014169895.1_ASM1416989v1	AP022297.1	3372	not_detected	0	not_applicable	gplas	3125	0.926749703440095	NA	0	NA	NA	not_applicable	not_applicable	no	0	0	no	no	NA	NA	NA	NA
GCA_014169915.1_ASM1416991v1	AP022299.1	123266	GCA_014169915.1_ASM1416991v1_bin_3	1494	3635	gplas	81872	0.664189638667597	0.012	1494	0.411	0.023	0	0	no	0	0	no	no	NA	NA	NA	NA
GCA_014169915.1_ASM1416991v1	AP022299.1	123266	GCA_014169915.1_ASM1416991v1_bin_2	41111	46732	gplas	81872	0.664189638667597	0.334	41111	0.88	0.484	5616	0.120174612685098	no	0	0	no	no	NA	NA	NA	NA
GCA_014169915.1_ASM1416991v1	AP022300.1	83140	GCA_014169915.1_ASM1416991v1_bin_3	2141	3635	gplas	43973	0.528903055087804	0.026	2141	0.589	0.05	0	0	no	5	0	yes	no	NA	NA	NA	NA
GCA_014169915.1_ASM1416991v1	AP022300.1	83140	GCA_014169915.1_ASM1416991v1_bin_1	18148	18148	gplas	43973	0.528903055087804	0.218	18148	1	0.358	0	0	no	5	0	yes	no	1	1	5	0.2
GCA_014169915.1_ASM1416991v1	AP022301.1	7936	GCA_014169915.1_ASM1416991v1_bin_4	7936	8013	gplas	7936	1	1	7936	0.99	0.995	0	0	yes	0	0	no	no	NA	NA	NA	NA
GCA_014169995.1_ASM1416999v1	CP054284.1	34051	GCA_014169995.1_ASM1416999v1_bin_1	31794	31794	gplas	33325	0.978679040263135	0.934	31794	1	0.966	0	0	yes	0	0	no	no	NA	NA	NA	NA
GCA_014169995.1_ASM1416999v1	CP054283.1	43621	GCA_014169995.1_ASM1416999v1_bin_2	43419	43698	gplas	43419	0.995369202906857	0.995	43419	0.994	0.994	0	0	yes	2	0	yes	no	2	2	2	1
GCA_014170595.1_ASM1417059v1	CP059905.1	141692	GCA_014170595.1_ASM1417059v1_bin_2	37393	68285	gplas	129616	0.914772887671852	0.264	37393	0.548	0.356	6987	0.102321153986966	no	1	0	yes	no	NA	NA	NA	NA
GCA_014170595.1_ASM1417059v1	CP059905.1	141692	GCA_014170595.1_ASM1417059v1_bin_1	12764	45307	gplas	129616	0.914772887671852	0.09	12764	0.282	0.136	12208	0.269450636766946	no	1	0	yes	no	NA	NA	NA	NA
GCA_014170595.1_ASM1417059v1	CP059906.1	110468	GCA_014170595.1_ASM1417059v1_bin_2	23816	68285	gplas	100696	0.911539993482275	0.216	23816	0.349	0.267	6987	0.102321153986966	no	2	1	yes	yes	NA	NA	NA	NA
GCA_014170595.1_ASM1417059v1	CP059906.1	110468	GCA_014170595.1_ASM1417059v1_bin_1	20172	45307	gplas	100696	0.911539993482275	0.183	20172	0.445	0.259	12208	0.269450636766946	no	2	1	yes	yes	NA	NA	NA	NA
GCA_014170615.1_ASM1417061v1	CP059908.1	193291	GCA_014170615.1_ASM1417061v1_bin_4	4868	11455	gplas	167435	0.866232778556684	0.025	4868	0.425	0.047	0	0	no	0	0	no	no	NA	NA	NA	NA
GCA_014170615.1_ASM1417061v1	CP059908.1	193291	GCA_014170615.1_ASM1417061v1_bin_2	50343	68592	gplas	167435	0.866232778556684	0.26	50343	0.734	0.384	0	0	no	0	0	no	no	NA	NA	NA	NA
GCA_014170615.1_ASM1417061v1	CP059908.1	193291	GCA_014170615.1_ASM1417061v1_bin_1	33314	71614	gplas	167435	0.866232778556684	0.172	33314	0.465	0.251	7651	0.106836652051275	no	0	0	no	no	NA	NA	NA	NA
GCA_014170615.1_ASM1417061v1	CP059909.1	111912	GCA_014170615.1_ASM1417061v1_bin_3	43518	43518	gplas	96644	0.863571377510901	0.389	43518	1	0.56	0	0	no	3	1	yes	yes	NA	NA	NA	NA
GCA_014170615.1_ASM1417061v1	CP059909.1	111912	GCA_014170615.1_ASM1417061v1_bin_4	6506	11455	gplas	96644	0.863571377510901	0.058	6506	0.568	0.105	0	0	no	3	1	yes	yes	NA	NA	NA	NA
GCA_014170615.1_ASM1417061v1	CP059909.1	111912	GCA_014170615.1_ASM1417061v1_bin_2	18179	68592	gplas	96644	0.863571377510901	0.162	18179	0.265	0.201	0	0	no	3	1	yes	yes	NA	NA	NA	NA
GCA_014170615.1_ASM1417061v1	CP059910.1	99361	GCA_014170615.1_ASM1417061v1_bin_1	30599	71614	gplas	95589	0.962037419108101	0.308	30599	0.427	0.358	7651	0.106836652051275	no	0	0	no	no	NA	NA	NA	NA
GCA_014170615.1_ASM1417061v1	CP059911.1	3245	not_detected	0	not_applicable	gplas	0	0	NA	0	NA	NA	not_applicable	not_applicable	no	0	0	no	no	NA	NA	NA	NA
GCA_014170615.1_ASM1417061v1	CP059912.1	1079	not_detected	0	not_applicable	gplas	0	0	NA	0	NA	NA	not_applicable	not_applicable	no	0	0	no	no	NA	NA	NA	NA
GCA_014170675.1_ASM1417067v1	CP059918.1	214538	GCA_014170675.1_ASM1417067v1_bin_1	132805	276259	gplas	176248	0.821523459713431	0.619	132805	0.481	0.541	41927	0.151767001256068	no	0	0	no	no	NA	NA	NA	NA
GCA_014170675.1_ASM1417067v1	CP059919.1	122123	GCA_014170675.1_ASM1417067v1_bin_1	101261	276259	gplas	115705	0.94744642696298	0.829	101261	0.367	0.509	41927	0.151767001256068	no	5	1	yes	yes	4	4	5	0.8
GCA_014170675.1_ASM1417067v1	CP059920.1	3140	not_detected	0	not_applicable	gplas	1298	0.413375796178344	NA	0	NA	NA	not_applicable	not_applicable	no	0	0	no	no	NA	NA	NA	NA
GCA_014170675.1_ASM1417067v1	CP059921.1	2096	not_detected	0	not_applicable	gplas	0	0	NA	0	NA	NA	not_applicable	not_applicable	no	0	0	no	no	NA	NA	NA	NA
GCA_014170695.1_ASM1417069v1	CP059923.1	133421	GCA_014170695.1_ASM1417069v1_bin_1	10610	70751	gplas	119129	0.892880431116541	0.08	10610	0.15	0.104	0	0	no	2	0	yes	no	NA	NA	NA	NA
GCA_014170695.1_ASM1417069v1	CP059923.1	133421	GCA_014170695.1_ASM1417069v1_bin_2	52259	85525	gplas	119129	0.892880431116541	0.392	52259	0.611	0.478	7361	0.0860684010523239	no	2	0	yes	no	NA	NA	NA	NA
GCA_014170695.1_ASM1417069v1	CP059923.1	133421	GCA_014170695.1_ASM1417069v1_bin_4	7224	18804	gplas	119129	0.892880431116541	0.054	7224	0.384	0.095	11577	0.615666879387364	no	2	0	yes	no	NA	NA	NA	NA
GCA_014170695.1_ASM1417069v1	CP059924.1	107524	GCA_014170695.1_ASM1417069v1_bin_1	60132	70751	gplas	100257	0.932415088724378	0.559	60132	0.85	0.674	0	0	no	3	1	yes	yes	NA	NA	NA	NA
GCA_014170695.1_ASM1417069v1	CP059924.1	107524	GCA_014170695.1_ASM1417069v1_bin_2	25465	85525	gplas	100257	0.932415088724378	0.237	25465	0.298	0.264	7361	0.0860684010523239	no	3	1	yes	yes	2	2	3	0.666666666666667
GCA_014170975.1_ASM1417097v1	CP059948.1	138915	GCA_014170975.1_ASM1417097v1_bin_1	66204	108415	gplas	130459	0.939128243890149	0.477	66204	0.611	0.536	5108	0.0471152515795785	no	4	1	yes	yes	NA	NA	NA	NA
GCA_014170975.1_ASM1417097v1	CP059948.1	138915	GCA_014170975.1_ASM1417097v1_bin_2	24762	24789	gplas	130459	0.939128243890149	0.178	24762	0.999	0.302	0	0	no	4	1	yes	yes	NA	NA	NA	NA
GCA_014170975.1_ASM1417097v1	CP059948.1	138915	GCA_014170975.1_ASM1417097v1_bin_3	12479	12479	gplas	130459	0.939128243890149	0.09	12479	1	0.165	0	0	no	4	1	yes	yes	1	1	4	0.25
GCA_014170975.1_ASM1417097v1	CP059949.1	37662	GCA_014170975.1_ASM1417097v1_bin_1	36969	108415	gplas	36969	0.981599490202326	0.982	36969	0.341	0.506	5108	0.0471152515795785	no	0	0	no	no	NA	NA	NA	NA
GCA_014170975.1_ASM1417097v1	CP059950.1	6652	not_detected	0	not_applicable	gplas	5489	0.825165363800361	NA	0	NA	NA	not_applicable	not_applicable	no	0	0	no	no	NA	NA	NA	NA
GCA_014170975.1_ASM1417097v1	CP059951.1	5631	not_detected	0	not_applicable	gplas	4468	0.793464748712485	NA	0	NA	NA	not_applicable	not_applicable	no	0	0	no	no	NA	NA	NA	NA
GCA_014170975.1_ASM1417097v1	CP059952.1	1506	not_detected	0	not_applicable	gplas	0	0	NA	0	NA	NA	not_applicable	not_applicable	no	0	0	no	no	NA	NA	NA	NA
GCA_014171015.1_ASM1417101v1	AP022088.1	183772	not_detected	0	not_applicable	gplas	120422	0.655279367912413	NA	0	NA	NA	not_applicable	not_applicable	no	0	0	no	no	NA	NA	NA	NA
GCA_014171015.1_ASM1417101v1	AP022089.1	110167	not_detected	0	not_applicable	gplas	108918	0.988662666678769	NA	0	NA	NA	not_applicable	not_applicable	no	0	0	no	no	NA	NA	NA	NA
GCA_014171015.1_ASM1417101v1	AP022090.1	80029	not_detected	0	not_applicable	gplas	57329	0.716352822101988	NA	0	NA	NA	not_applicable	not_applicable	no	2	0	yes	no	NA	NA	2	NA
GCA_014171015.1_ASM1417101v1	AP022091.1	74261	not_detected	0	not_applicable	gplas	60954	0.820807691789769	NA	0	NA	NA	not_applicable	not_applicable	no	1	1	yes	yes	NA	NA	1	NA
GCA_014171015.1_ASM1417101v1	AP022092.1	6796	not_detected	0	not_applicable	gplas	6760	0.994702766333137	NA	0	NA	NA	not_applicable	not_applicable	no	0	0	no	no	NA	NA	NA	NA
GCA_014171015.1_ASM1417101v1	AP022093.1	5344	not_detected	0	not_applicable	gplas	5344	1	NA	0	NA	NA	not_applicable	not_applicable	no	0	0	no	no	NA	NA	NA	NA
GCA_014171015.1_ASM1417101v1	AP022094.1	3137	not_detected	0	not_applicable	gplas	3137	1	NA	0	NA	NA	not_applicable	not_applicable	no	0	0	no	no	NA	NA	NA	NA
GCA_003812945.1_ASM381294v1	CP033847.1	143865	GCA_003812945.1_ASM381294v1_bin_4	22752	26675	HyAsP	132597	0.921676571786049	0.158	22752	0.853	0.267	0	0	no	1	0	yes	no	NA	NA	NA	NA
GCA_003812945.1_ASM381294v1	CP033847.1	143865	GCA_003812945.1_ASM381294v1_bin_6	7029	2343	HyAsP	132597	0.921676571786049	0.049	2343	1	0.093	2343	1	no	1	0	yes	no	NA	NA	NA	NA
GCA_003812945.1_ASM381294v1	CP033847.1	143865	GCA_003812945.1_ASM381294v1_bin_8	43062	43062	HyAsP	132597	0.921676571786049	0.299	43062	1	0.46	0	0	no	1	0	yes	no	1	1	1	1
GCA_003812945.1_ASM381294v1	CP033847.1	143865	GCA_003812945.1_ASM381294v1_bin_7	37867	45090	HyAsP	132597	0.921676571786049	0.263	37867	0.84	0.401	4586	0.101707695719672	no	1	0	yes	no	NA	NA	NA	NA
GCA_003812945.1_ASM381294v1	CP033847.1	143865	GCA_003812945.1_ASM381294v1_bin_10	1786	2717	HyAsP	132597	0.921676571786049	0.012	1786	0.657	0.024	0	0	no	1	0	yes	no	NA	NA	NA	NA
GCA_003812945.1_ASM381294v1	CP033847.1	143865	GCA_003812945.1_ASM381294v1_bin_5	3018	9718	HyAsP	132597	0.921676571786049	0.021	3018	0.311	0.039	5091	0.523873224943404	no	1	0	yes	no	NA	NA	NA	NA
GCA_003812945.1_ASM381294v1	CP033848.1	97018	GCA_003812945.1_ASM381294v1_bin_11	94667	119929	HyAsP	94667	0.975767383372158	0.976	94667	0.789	0.873	19824	0.165297801199043	no	0	0	no	no	NA	NA	NA	NA
GCA_003812945.1_ASM381294v1	CP033849.1	32101	GCA_003812945.1_ASM381294v1_bin_2	31761	32179	HyAsP	31761	0.989408429643936	0.989	31761	0.987	0.988	0	0	yes	0	0	no	no	NA	NA	NA	NA
GCA_003812945.1_ASM381294v1	CP033851.1	4082	GCA_003812945.1_ASM381294v1_bin_1	4082	4159	HyAsP	4082	1	1	4082	0.981	0.99	0	0	yes	0	0	no	no	NA	NA	NA	NA
GCA_003812945.1_ASM381294v1	CP033852.1	1459	GCA_003812945.1_ASM381294v1_bin_3	1459	1536	HyAsP	1459	1	1	1459	0.95	0.974	0	0	yes	0	0	no	no	NA	NA	NA	NA
GCA_003812945.1_ASM381294v1	CP033853.1	3257	not_detected	0	not_applicable	HyAsP	3257	1	NA	0	NA	NA	not_applicable	not_applicable	no	0	0	no	no	NA	NA	NA	NA
GCA_006352265.1_ASM635226v1	CP040068.1	210031	GCA_006352265.1_ASM635226v1_bin_17	1230	9964	HyAsP	204329	0.972851626664635	0.006	1230	0.123	0.011	8618	0.864913689281413	no	6	0	yes	no	1	1	6	0.166666666666667
GCA_006352265.1_ASM635226v1	CP040068.1	210031	GCA_006352265.1_ASM635226v1_bin_19	1163	81428	HyAsP	204329	0.972851626664635	0.006	1163	0.014	0.008	79137	0.971864714840104	no	6	0	yes	no	1	1	6	0.166666666666667
GCA_006352265.1_ASM635226v1	CP040068.1	210031	GCA_006352265.1_ASM635226v1_bin_9	8803	8803	HyAsP	204329	0.972851626664635	0.042	8803	1	0.081	0	0	no	6	0	yes	no	1	1	6	0.166666666666667
GCA_006352265.1_ASM635226v1	CP040068.1	210031	GCA_006352265.1_ASM635226v1_bin_16	3880	98595	HyAsP	204329	0.972851626664635	0.018	3880	0.039	0.025	0	0	no	6	0	yes	no	NA	NA	NA	NA
GCA_006352265.1_ASM635226v1	CP040068.1	210031	GCA_006352265.1_ASM635226v1_bin_3	1423	1423	HyAsP	204329	0.972851626664635	0.007	1423	1	0.014	0	0	no	6	0	yes	no	NA	NA	NA	NA
GCA_006352265.1_ASM635226v1	CP040068.1	210031	GCA_006352265.1_ASM635226v1_bin_20	161043	163269	HyAsP	204329	0.972851626664635	0.767	161043	0.986	0.863	0	0	no	6	0	yes	no	NA	NA	NA	NA
GCA_006352265.1_ASM635226v1	CP040068.1	210031	GCA_006352265.1_ASM635226v1_bin_6	4687	4687	HyAsP	204329	0.972851626664635	0.022	4687	1	0.043	0	0	no	6	0	yes	no	2	2	6	0.333333333333333
GCA_006352265.1_ASM635226v1	CP040069.1	97582	GCA_006352265.1_ASM635226v1_bin_16	91075	98595	HyAsP	96632	0.990264597979135	0.933	91075	0.924	0.928	0	0	no	0	0	no	no	NA	NA	NA	NA
GCA_006352265.1_ASM635226v1	CP040070.1	82718	GCA_006352265.1_ASM635226v1_bin_5	7612	7766	HyAsP	72945	0.881851592156483	0.092	7612	0.98	0.168	0	0	no	5	0	yes	no	2	2	5	0.4
GCA_006352265.1_ASM635226v1	CP040070.1	82718	GCA_006352265.1_ASM635226v1_bin_8	16888	16888	HyAsP	72945	0.881851592156483	0.204	16888	1	0.339	0	0	no	5	0	yes	no	NA	NA	NA	NA
GCA_006352265.1_ASM635226v1	CP040070.1	82718	GCA_006352265.1_ASM635226v1_bin_11	1430	27307	HyAsP	72945	0.881851592156483	0.017	1430	0.052	0.026	25877	0.947632475189512	no	5	0	yes	no	NA	NA	NA	NA
GCA_006352265.1_ASM635226v1	CP040070.1	82718	GCA_006352265.1_ASM635226v1_bin_14	2480	2480	HyAsP	72945	0.881851592156483	0.03	2480	1	0.058	0	0	no	5	0	yes	no	2	2	5	0.4
GCA_006352265.1_ASM635226v1	CP040070.1	82718	GCA_006352265.1_ASM635226v1_bin_10	28898	41808	HyAsP	72945	0.881851592156483	0.349	27811	0.665	0.458	10945	0.261792001530808	no	5	0	yes	no	NA	NA	NA	NA
GCA_006352265.1_ASM635226v1	CP040070.1	82718	GCA_006352265.1_ASM635226v1_bin_16	5794	98595	HyAsP	72945	0.881851592156483	0.07	5794	0.059	0.064	0	0	no	5	0	yes	no	1	1	5	0.2
GCA_006352265.1_ASM635226v1	CP040070.1	82718	GCA_006352265.1_ASM635226v1_bin_21	2286	123142	HyAsP	72945	0.881851592156483	0.028	2286	0.019	0.023	117901	0.957439378928392	no	5	0	yes	no	NA	NA	NA	NA
GCA_006352265.1_ASM635226v1	CP040070.1	82718	GCA_006352265.1_ASM635226v1_bin_13	3143	4957	HyAsP	72945	0.881851592156483	0.038	3143	0.634	0.072	0	0	no	5	0	yes	no	NA	NA	NA	NA
GCA_006352265.1_ASM635226v1	CP040071.1	7406	GCA_006352265.1_ASM635226v1_bin_2	1749	2011	HyAsP	7145	0.964758304077775	0.236	1749	0.87	0.371	0	0	no	1	0	yes	no	1	1	1	1
GCA_006352265.1_ASM635226v1	CP040071.1	7406	GCA_006352265.1_ASM635226v1_bin_1	5396	5703	HyAsP	7145	0.964758304077775	0.729	5396	0.946	0.823	0	0	no	1	0	yes	no	NA	NA	NA	NA
GCA_006352265.1_ASM635226v1	CP040072.1	5221	GCA_006352265.1_ASM635226v1_bin_4	5221	5298	HyAsP	5221	1	1	5221	0.985	0.992	0	0	yes	0	0	no	no	NA	NA	NA	NA
GCA_006352265.1_ASM635226v1	CP040073.1	1806	not_detected	0	not_applicable	HyAsP	0	0	NA	0	NA	NA	not_applicable	not_applicable	no	0	0	no	no	NA	NA	NA	NA
GCA_006352265.1_ASM635226v1	CP040074.1	1445	not_detected	0	not_applicable	HyAsP	1072	0.741868512110727	NA	0	NA	NA	not_applicable	not_applicable	no	0	0	no	no	NA	NA	NA	NA
GCA_006352265.1_ASM635226v1	CP040075.1	1265	not_detected	0	not_applicable	HyAsP	0	0	NA	0	NA	NA	not_applicable	not_applicable	no	0	0	no	no	NA	NA	NA	NA
GCA_006352265.1_ASM635226v1	CP040076.1	763	not_detected	0	not_applicable	HyAsP	0	0	NA	0	NA	NA	not_applicable	not_applicable	no	0	0	no	no	NA	NA	NA	NA
GCA_009720465.1_ASM972046v1	CP041956.1	74945	GCA_009720465.1_ASM972046v1_bin_7	3663	24542	HyAsP	66999	0.893975582093535	0.049	3663	0.149	0.074	1313	0.0535001222394263	no	7	1	yes	yes	1	1	7	0.142857142857143
GCA_009720465.1_ASM972046v1	CP041956.1	74945	GCA_009720465.1_ASM972046v1_bin_3	5119	7357	HyAsP	66999	0.893975582093535	0.068	5119	0.696	0.124	0	0	no	7	1	yes	yes	1	1	7	0.142857142857143
GCA_009720465.1_ASM972046v1	CP041956.1	74945	GCA_009720465.1_ASM972046v1_bin_6	36616	110130	HyAsP	66999	0.893975582093535	0.489	36616	0.332	0.395	71817	0.652111141378371	no	7	1	yes	yes	2	2	7	0.285714285714286
GCA_009720465.1_ASM972046v1	CP041956.1	74945	GCA_009720465.1_ASM972046v1_bin_10	1375	6440	HyAsP	66999	0.893975582093535	0.018	1375	0.214	0.033	3857	0.598913043478261	no	7	1	yes	yes	NA	NA	NA	NA
GCA_009720465.1_ASM972046v1	CP041956.1	74945	GCA_009720465.1_ASM972046v1_bin_14	12329	12542	HyAsP	66999	0.893975582093535	0.165	12329	0.983	0.283	0	0	no	7	1	yes	yes	2	2	7	0.285714285714286
GCA_009720465.1_ASM972046v1	CP041956.1	74945	GCA_009720465.1_ASM972046v1_bin_4	5465	158870	HyAsP	66999	0.893975582093535	0.073	5465	0.034	0.046	104604	0.658425127462705	no	7	1	yes	yes	1	6	7	0.142857142857143
GCA_009720465.1_ASM972046v1	CP041956.1	74945	GCA_009720465.1_ASM972046v1_bin_15	1111	1472	HyAsP	66999	0.893975582093535	0.015	1111	0.755	0.029	1111	0.754755434782609	no	7	1	yes	yes	NA	NA	NA	NA
GCA_009720465.1_ASM972046v1	CP041956.1	74945	GCA_009720465.1_ASM972046v1_bin_2	1440	1811	HyAsP	66999	0.893975582093535	0.019	1440	0.795	0.037	1439	0.794588625069023	no	7	1	yes	yes	NA	NA	NA	NA
GCA_009720465.1_ASM972046v1	CP041956.1	74945	GCA_009720465.1_ASM972046v1_bin_5	3269	4373	HyAsP	66999	0.893975582093535	0.044	3269	0.748	0.083	3270	0.747770409329979	no	7	1	yes	yes	NA	NA	NA	NA
GCA_009720465.1_ASM972046v1	CP041957.1	83648	GCA_009720465.1_ASM972046v1_bin_7	18735	24542	HyAsP	74289	0.88811447972456	0.224	18735	0.763	0.346	1313	0.0535001222394263	no	5	0	yes	no	NA	NA	NA	NA
GCA_009720465.1_ASM972046v1	CP041957.1	83648	GCA_009720465.1_ASM972046v1_bin_3	1122	7357	HyAsP	74289	0.88811447972456	0.013	1122	0.153	0.024	0	0	no	5	0	yes	no	NA	NA	NA	NA
GCA_009720465.1_ASM972046v1	CP041957.1	83648	GCA_009720465.1_ASM972046v1_bin_4	46570	158870	HyAsP	74289	0.88811447972456	0.557	46570	0.293	0.384	104604	0.658425127462705	no	5	0	yes	no	4	6	5	0.8
GCA_009720465.1_ASM972046v1	CP041957.1	83648	GCA_009720465.1_ASM972046v1_bin_13	8049	8049	HyAsP	74289	0.88811447972456	0.096	8049	1	0.175	0	0	no	5	0	yes	no	NA	NA	NA	NA
GCA_009720465.1_ASM972046v1	CP041958.1	4072	GCA_009720465.1_ASM972046v1_bin_1	4072	4149	HyAsP	4072	1	1	4072	0.981	0.99	0	0	yes	0	0	no	no	NA	NA	NA	NA
GCA_009720465.1_ASM972046v1	CP041959.1	84917	GCA_009720465.1_ASM972046v1_bin_8	4573	5787	HyAsP	80718	0.950551715204258	0.054	4573	0.79	0.101	0	0	no	1	0	yes	no	NA	NA	NA	NA
GCA_009720465.1_ASM972046v1	CP041960.1	98151	not_detected	0	not_applicable	HyAsP	94360	0.961375839268067	NA	0	NA	NA	not_applicable	not_applicable	no	0	0	no	no	NA	NA	NA	NA
GCA_009905115.1_ASM990511v1	CP047572.1	127645	GCA_009905115.1_ASM990511v1_bin_7	59410	61093	HyAsP	115349	0.903670335696659	0.465	59410	0.972	0.629	0	0	no	6	1	yes	yes	NA	NA	NA	NA
GCA_009905115.1_ASM990511v1	CP047572.1	127645	GCA_009905115.1_ASM990511v1_bin_22	2256	5844	HyAsP	115349	0.903670335696659	0.018	2256	0.386	0.034	0	0	no	6	1	yes	yes	1	1	6	0.166666666666667
GCA_009905115.1_ASM990511v1	CP047572.1	127645	GCA_009905115.1_ASM990511v1_bin_5	2939	7748	HyAsP	115349	0.903670335696659	0.023	2939	0.379	0.043	0	0	no	6	1	yes	yes	NA	NA	NA	NA
GCA_009905115.1_ASM990511v1	CP047572.1	127645	GCA_009905115.1_ASM990511v1_bin_4	1473	1473	HyAsP	115349	0.903670335696659	0.012	1473	1	0.024	0	0	no	6	1	yes	yes	NA	NA	NA	NA
GCA_009905115.1_ASM990511v1	CP047572.1	127645	GCA_009905115.1_ASM990511v1_bin_6	4947	7999	HyAsP	115349	0.903670335696659	0.039	4947	0.618	0.073	0	0	no	6	1	yes	yes	2	2	6	0.333333333333333
GCA_009905115.1_ASM990511v1	CP047572.1	127645	GCA_009905115.1_ASM990511v1_bin_17	1041	15382	HyAsP	115349	0.903670335696659	0.008	1041	0.068	0.014	0	0	no	6	1	yes	yes	NA	NA	NA	NA
GCA_009905115.1_ASM990511v1	CP047572.1	127645	GCA_009905115.1_ASM990511v1_bin_16	1318	1945	HyAsP	115349	0.903670335696659	0.01	1318	0.678	0.02	0	0	no	6	1	yes	yes	NA	NA	NA	NA
GCA_009905115.1_ASM990511v1	CP047572.1	127645	GCA_009905115.1_ASM990511v1_bin_1	2113	2113	HyAsP	115349	0.903670335696659	0.017	2113	1	0.033	0	0	no	6	1	yes	yes	NA	NA	NA	NA
GCA_009905115.1_ASM990511v1	CP047572.1	127645	GCA_009905115.1_ASM990511v1_bin_13	35811	37948	HyAsP	115349	0.903670335696659	0.281	35811	0.944	0.433	0	0	no	6	1	yes	yes	NA	NA	NA	NA
GCA_009905115.1_ASM990511v1	CP047573.1	113013	GCA_009905115.1_ASM990511v1_bin_11	12966	21132	HyAsP	93404	0.826488987992532	0.115	12966	0.614	0.194	0	0	no	8	0	yes	no	2	2	8	0.25
GCA_009905115.1_ASM990511v1	CP047573.1	113013	GCA_009905115.1_ASM990511v1_bin_5	2939	7748	HyAsP	93404	0.826488987992532	0.026	2939	0.379	0.049	0	0	no	8	0	yes	no	NA	NA	NA	NA
GCA_009905115.1_ASM990511v1	CP047573.1	113013	GCA_009905115.1_ASM990511v1_bin_19	27750	52459	HyAsP	93404	0.826488987992532	0.246	27750	0.529	0.336	0	0	no	8	0	yes	no	NA	NA	NA	NA
GCA_009905115.1_ASM990511v1	CP047573.1	113013	GCA_009905115.1_ASM990511v1_bin_9	1445	1445	HyAsP	93404	0.826488987992532	0.013	1445	1	0.026	0	0	no	8	0	yes	no	NA	NA	NA	NA
GCA_009905115.1_ASM990511v1	CP047573.1	113013	GCA_009905115.1_ASM990511v1_bin_6	4433	7999	HyAsP	93404	0.826488987992532	0.039	4433	0.554	0.073	0	0	no	8	0	yes	no	NA	NA	NA	NA
GCA_009905115.1_ASM990511v1	CP047573.1	113013	GCA_009905115.1_ASM990511v1_bin_17	1270	15382	HyAsP	93404	0.826488987992532	0.011	1270	0.083	0.019	0	0	no	8	0	yes	no	NA	NA	NA	NA
GCA_009905115.1_ASM990511v1	CP047573.1	113013	GCA_009905115.1_ASM990511v1_bin_14	1732	1732	HyAsP	93404	0.826488987992532	0.015	1732	1	0.03	0	0	no	8	0	yes	no	NA	NA	NA	NA
GCA_009905115.1_ASM990511v1	CP047573.1	113013	GCA_009905115.1_ASM990511v1_bin_15	36910	38475	HyAsP	93404	0.826488987992532	0.327	36910	0.959	0.488	0	0	no	8	0	yes	no	2	2	8	0.25
GCA_009905115.1_ASM990511v1	CP047574.1	64451	GCA_009905115.1_ASM990511v1_bin_11	5199	21132	HyAsP	54324	0.842872880172534	0.081	5199	0.246	0.122	0	0	no	0	0	no	no	NA	NA	NA	NA
GCA_009905115.1_ASM990511v1	CP047574.1	64451	GCA_009905115.1_ASM990511v1_bin_19	21785	52459	HyAsP	54324	0.842872880172534	0.338	21785	0.415	0.373	0	0	no	0	0	no	no	NA	NA	NA	NA
GCA_009905115.1_ASM990511v1	CP047574.1	64451	GCA_009905115.1_ASM990511v1_bin_3	5953	6589	HyAsP	54324	0.842872880172534	0.092	5953	0.903	0.167	0	0	no	0	0	no	no	NA	NA	NA	NA
GCA_009905115.1_ASM990511v1	CP047574.1	64451	GCA_009905115.1_ASM990511v1_bin_17	12369	15382	HyAsP	54324	0.842872880172534	0.192	11057	0.719	0.303	0	0	no	0	0	no	no	NA	NA	NA	NA
GCA_009905115.1_ASM990511v1	CP047574.1	64451	GCA_009905115.1_ASM990511v1_bin_18	2513	3842	HyAsP	54324	0.842872880172534	0.039	2513	0.654	0.074	0	0	no	0	0	no	no	NA	NA	NA	NA
GCA_009905115.1_ASM990511v1	CP047574.1	64451	GCA_009905115.1_ASM990511v1_bin_21	2624	1811	HyAsP	54324	0.842872880172534	0.041	1312	0.724	0.078	0	0	no	0	0	no	no	NA	NA	NA	NA
GCA_009905115.1_ASM990511v1	CP047574.1	64451	GCA_009905115.1_ASM990511v1_bin_13	1041	37948	HyAsP	54324	0.842872880172534	0.016	1041	0.027	0.02	0	0	no	0	0	no	no	NA	NA	NA	NA
GCA_009905115.1_ASM990511v1	CP047574.1	64451	GCA_009905115.1_ASM990511v1_bin_24	4716	4716	HyAsP	54324	0.842872880172534	0.073	4716	1	0.136	0	0	no	0	0	no	no	NA	NA	NA	NA
GCA_009905115.1_ASM990511v1	CP047575.1	2312	not_detected	0	not_applicable	HyAsP	0	0	NA	0	NA	NA	not_applicable	not_applicable	no	0	0	no	no	NA	NA	NA	NA
GCA_009905135.1_ASM990513v1	CP047577.1	178137	GCA_009905135.1_ASM990513v1_bin_7	1651	1803	HyAsP	157003	0.881360974979931	0.009	1651	0.916	0.018	0	0	no	4	0	yes	no	NA	NA	NA	NA
GCA_009905135.1_ASM990513v1	CP047577.1	178137	GCA_009905135.1_ASM990513v1_bin_16	56296	59048	HyAsP	157003	0.881360974979931	0.316	54937	0.93	0.472	2532	0.0428803685137515	no	4	0	yes	no	1	1	4	0.25
GCA_009905135.1_ASM990513v1	CP047577.1	178137	GCA_009905135.1_ASM990513v1_bin_12	46927	54068	HyAsP	157003	0.881360974979931	0.263	46927	0.868	0.404	0	0	no	4	0	yes	no	NA	NA	NA	NA
GCA_009905135.1_ASM990513v1	CP047577.1	178137	GCA_009905135.1_ASM990513v1_bin_3	1651	8923	HyAsP	157003	0.881360974979931	0.009	1651	0.185	0.017	0	0	no	4	0	yes	no	NA	NA	NA	NA
GCA_009905135.1_ASM990513v1	CP047577.1	178137	GCA_009905135.1_ASM990513v1_bin_5	11280	11280	HyAsP	157003	0.881360974979931	0.063	11280	1	0.119	0	0	no	4	0	yes	no	NA	NA	NA	NA
GCA_009905135.1_ASM990513v1	CP047577.1	178137	GCA_009905135.1_ASM990513v1_bin_9	8392	8997	HyAsP	157003	0.881360974979931	0.047	8392	0.933	0.089	0	0	no	4	0	yes	no	NA	NA	NA	NA
GCA_009905135.1_ASM990513v1	CP047577.1	178137	GCA_009905135.1_ASM990513v1_bin_11	32380	37015	HyAsP	157003	0.881360974979931	0.182	32380	0.875	0.301	0	0	no	4	0	yes	no	3	3	4	0.75
GCA_009905135.1_ASM990513v1	CP047578.1	134426	GCA_009905135.1_ASM990513v1_bin_6	1473	1473	HyAsP	118404	0.880811747727374	0.011	1473	1	0.022	0	0	no	7	1	yes	yes	NA	NA	NA	NA
GCA_009905135.1_ASM990513v1	CP047578.1	134426	GCA_009905135.1_ASM990513v1_bin_17	28871	35262	HyAsP	118404	0.880811747727374	0.215	28871	0.819	0.341	0	0	no	7	1	yes	yes	1	1	7	0.142857142857143
GCA_009905135.1_ASM990513v1	CP047578.1	134426	GCA_009905135.1_ASM990513v1_bin_16	2532	59048	HyAsP	118404	0.880811747727374	0.019	2532	0.043	0.026	2532	0.0428803685137515	no	7	1	yes	yes	NA	NA	NA	NA
GCA_009905135.1_ASM990513v1	CP047578.1	134426	GCA_009905135.1_ASM990513v1_bin_2	2113	2113	HyAsP	118404	0.880811747727374	0.016	2113	1	0.031	0	0	no	7	1	yes	yes	NA	NA	NA	NA
GCA_009905135.1_ASM990513v1	CP047578.1	134426	GCA_009905135.1_ASM990513v1_bin_10	49396	158827	HyAsP	118404	0.880811747727374	0.367	49396	0.311	0.337	0	0	no	7	1	yes	yes	NA	NA	NA	NA
GCA_009905135.1_ASM990513v1	CP047578.1	134426	GCA_009905135.1_ASM990513v1_bin_3	4456	8923	HyAsP	118404	0.880811747727374	0.033	4456	0.499	0.062	0	0	no	7	1	yes	yes	NA	NA	NA	NA
GCA_009905135.1_ASM990513v1	CP047578.1	134426	GCA_009905135.1_ASM990513v1_bin_13	10529	17688	HyAsP	118404	0.880811747727374	0.078	10529	0.595	0.138	0	0	no	7	1	yes	yes	NA	NA	NA	NA
GCA_009905135.1_ASM990513v1	CP047578.1	134426	GCA_009905135.1_ASM990513v1_bin_18	4903	4903	HyAsP	118404	0.880811747727374	0.036	4903	1	0.069	0	0	no	7	1	yes	yes	1	1	7	0.142857142857143
GCA_009905135.1_ASM990513v1	CP047578.1	134426	GCA_009905135.1_ASM990513v1_bin_8	6938	9823	HyAsP	118404	0.880811747727374	0.052	6938	0.706	0.097	0	0	no	7	1	yes	yes	3	3	7	0.428571428571429
GCA_009905135.1_ASM990513v1	CP047579.1	60960	GCA_009905135.1_ASM990513v1_bin_10	57583	158827	HyAsP	59510	0.976213910761155	0.945	57583	0.363	0.525	0	0	no	1	0	yes	no	1	1	1	1
GCA_009905135.1_ASM990513v1	CP047579.1	60960	GCA_009905135.1_ASM990513v1_bin_14	1927	3031	HyAsP	59510	0.976213910761155	0.032	1927	0.636	0.061	0	0	no	1	0	yes	no	NA	NA	NA	NA
GCA_009905135.1_ASM990513v1	CP047580.1	47443	GCA_009905135.1_ASM990513v1_bin_4	39012	39362	HyAsP	44469	0.937314250785153	0.822	39012	0.991	0.899	0	0	no	0	0	no	no	NA	NA	NA	NA
GCA_009905135.1_ASM990513v1	CP047580.1	47443	GCA_009905135.1_ASM990513v1_bin_13	5457	17688	HyAsP	44469	0.937314250785153	0.115	5457	0.309	0.168	0	0	no	0	0	no	no	NA	NA	NA	NA
GCA_009905135.1_ASM990513v1	CP047581.1	6647	GCA_009905135.1_ASM990513v1_bin_1	6647	6724	HyAsP	6647	1	1	6647	0.989	0.994	0	0	yes	0	0	no	no	NA	NA	NA	NA
GCA_009905135.1_ASM990513v1	CP047582.1	1506	not_detected	0	not_applicable	HyAsP	0	0	NA	0	NA	NA	not_applicable	not_applicable	no	0	0	no	no	NA	NA	NA	NA
GCA_010706435.1_ASM1070643v1	CP048648.1	126964	GCA_010706435.1_ASM1070643v1_bin_7	30613	33752	HyAsP	121033	0.953285970826376	0.241	30613	0.907	0.381	0	0	no	2	0	yes	no	NA	NA	NA	NA
GCA_010706435.1_ASM1070643v1	CP048648.1	126964	GCA_010706435.1_ASM1070643v1_bin_2	2977	3756	HyAsP	121033	0.953285970826376	0.023	2977	0.793	0.045	0	0	no	2	0	yes	no	NA	NA	NA	NA
GCA_010706435.1_ASM1070643v1	CP048648.1	126964	GCA_010706435.1_ASM1070643v1_bin_6	53342	53280	HyAsP	121033	0.953285970826376	0.42	51070	0.959	0.584	2272	0.0426426426426426	no	2	0	yes	no	2	2	2	1
GCA_010706435.1_ASM1070643v1	CP048648.1	126964	GCA_010706435.1_ASM1070643v1_bin_3	3363	5327	HyAsP	121033	0.953285970826376	0.026	3363	0.631	0.05	1300	0.244039797259245	no	2	0	yes	no	NA	NA	NA	NA
GCA_010706435.1_ASM1070643v1	CP048648.1	126964	GCA_010706435.1_ASM1070643v1_bin_9	1300	2133	HyAsP	121033	0.953285970826376	0.01	1300	0.609	0.02	1300	0.609470229723394	no	2	0	yes	no	NA	NA	NA	NA
GCA_010706435.1_ASM1070643v1	CP048648.1	126964	GCA_010706435.1_ASM1070643v1_bin_4	29792	29792	HyAsP	121033	0.953285970826376	0.235	29792	1	0.381	0	0	no	2	0	yes	no	NA	NA	NA	NA
GCA_011330935.1_ASM1133093v1	CP049078.1	70740	GCA_011330935.1_ASM1133093v1_bin_16	2196	6903	HyAsP	20906	0.29553293751767	0.031	2196	0.318	0.056	0	0	no	0	0	no	no	NA	NA	NA	NA
GCA_011330935.1_ASM1133093v1	CP049078.1	70740	GCA_011330935.1_ASM1133093v1_bin_11	2169	3223	HyAsP	20906	0.29553293751767	0.031	2169	0.673	0.059	0	0	no	0	0	no	no	NA	NA	NA	NA
GCA_011330935.1_ASM1133093v1	CP049078.1	70740	GCA_011330935.1_ASM1133093v1_bin_7	1262	2705	HyAsP	20906	0.29553293751767	0.018	1262	0.467	0.035	1443	0.533456561922366	no	0	0	no	no	NA	NA	NA	NA
GCA_011330935.1_ASM1133093v1	CP049078.1	70740	GCA_011330935.1_ASM1133093v1_bin_26	1305	1305	HyAsP	20906	0.29553293751767	0.018	1305	1	0.035	0	0	no	0	0	no	no	NA	NA	NA	NA
GCA_011330935.1_ASM1133093v1	CP049078.1	70740	GCA_011330935.1_ASM1133093v1_bin_20	11656	12708	HyAsP	20906	0.29553293751767	0.165	11656	0.917	0.28	0	0	no	0	0	no	no	NA	NA	NA	NA
GCA_011330935.1_ASM1133093v1	CP049079.1	180963	GCA_011330935.1_ASM1133093v1_bin_4	10662	10662	HyAsP	111257	0.614805236429546	0.059	10662	1	0.111	0	0	no	9	1	yes	yes	4	4	9	0.444444444444444
GCA_011330935.1_ASM1133093v1	CP049079.1	180963	GCA_011330935.1_ASM1133093v1_bin_22	1325	8612	HyAsP	111257	0.614805236429546	0.007	1325	0.154	0.013	0	0	no	9	1	yes	yes	NA	NA	NA	NA
GCA_011330935.1_ASM1133093v1	CP049079.1	180963	GCA_011330935.1_ASM1133093v1_bin_7	1443	2705	HyAsP	111257	0.614805236429546	0.008	1443	0.533	0.016	1443	0.533456561922366	no	9	1	yes	yes	NA	NA	NA	NA
GCA_011330935.1_ASM1133093v1	CP049079.1	180963	GCA_011330935.1_ASM1133093v1_bin_10	2712	2817	HyAsP	111257	0.614805236429546	0.015	2712	0.963	0.03	0	0	no	9	1	yes	yes	NA	NA	NA	NA
GCA_011330935.1_ASM1133093v1	CP049079.1	180963	GCA_011330935.1_ASM1133093v1_bin_13	4287	4287	HyAsP	111257	0.614805236429546	0.024	4287	1	0.047	4287	1	no	9	1	yes	yes	1	1	9	0.111111111111111
GCA_011330935.1_ASM1133093v1	CP049079.1	180963	GCA_011330935.1_ASM1133093v1_bin_18	2355	4596	HyAsP	111257	0.614805236429546	0.013	2355	0.512	0.025	0	0	no	9	1	yes	yes	NA	NA	NA	NA
GCA_011330935.1_ASM1133093v1	CP049079.1	180963	GCA_011330935.1_ASM1133093v1_bin_5	5012	6653	HyAsP	111257	0.614805236429546	0.028	5012	0.753	0.054	5013	0.753494664061326	no	9	1	yes	yes	3	3	9	0.333333333333333
GCA_011330935.1_ASM1133093v1	CP049079.1	180963	GCA_011330935.1_ASM1133093v1_bin_2	2581	2695	HyAsP	111257	0.614805236429546	0.014	2581	0.958	0.028	2580	0.957328385899815	no	9	1	yes	yes	NA	NA	NA	NA
GCA_011330935.1_ASM1133093v1	CP049079.1	180963	GCA_011330935.1_ASM1133093v1_bin_19	11612	12625	HyAsP	111257	0.614805236429546	0.064	11612	0.92	0.12	0	0	no	9	1	yes	yes	NA	NA	NA	NA
GCA_011330935.1_ASM1133093v1	CP049079.1	180963	GCA_011330935.1_ASM1133093v1_bin_3	10514	12083	HyAsP	111257	0.614805236429546	0.058	10514	0.87	0.109	0	0	no	9	1	yes	yes	1	1	9	0.111111111111111
GCA_011330935.1_ASM1133093v1	CP049079.1	180963	GCA_011330935.1_ASM1133093v1_bin_24	3389	3389	HyAsP	111257	0.614805236429546	0.019	3389	1	0.037	0	0	no	9	1	yes	yes	NA	NA	NA	NA
GCA_011330935.1_ASM1133093v1	CP049079.1	180963	GCA_011330935.1_ASM1133093v1_bin_6	7640	7754	HyAsP	111257	0.614805236429546	0.042	7640	0.985	0.081	0	0	no	9	1	yes	yes	NA	NA	NA	NA
GCA_011330935.1_ASM1133093v1	CP049079.1	180963	GCA_011330935.1_ASM1133093v1_bin_9	12799	21623	HyAsP	111257	0.614805236429546	0.071	12799	0.592	0.127	0	0	no	9	1	yes	yes	NA	NA	NA	NA
GCA_011330935.1_ASM1133093v1	CP049079.1	180963	GCA_011330935.1_ASM1133093v1_bin_12	13021	14629	HyAsP	111257	0.614805236429546	0.072	13021	0.89	0.133	0	0	no	9	1	yes	yes	NA	NA	NA	NA
GCA_011331065.1_ASM1133106v1	CP049082.1	143163	GCA_011331065.1_ASM1133106v1_bin_5	43037	44874	HyAsP	129388	0.903781004868576	0.301	43037	0.959	0.458	2916	0.0649819494584837	no	7	1	yes	yes	4	4	7	0.571428571428571
GCA_011331065.1_ASM1133106v1	CP049082.1	143163	GCA_011331065.1_ASM1133106v1_bin_3	6719	7171	HyAsP	129388	0.903781004868576	0.047	5374	0.749	0.088	0	0	no	7	1	yes	yes	1	1	7	0.142857142857143
GCA_011331065.1_ASM1133106v1	CP049082.1	143163	GCA_011331065.1_ASM1133106v1_bin_8	76967	116510	HyAsP	129388	0.903781004868576	0.538	76967	0.661	0.593	34017	0.291966354819329	no	7	1	yes	yes	1	1	7	0.142857142857143
GCA_011331065.1_ASM1133106v1	CP049082.1	143163	GCA_011331065.1_ASM1133106v1_bin_7	2551	11426	HyAsP	129388	0.903781004868576	0.018	2551	0.223	0.033	0	0	no	7	1	yes	yes	1	4	7	0.142857142857143
GCA_011331065.1_ASM1133106v1	CP049083.1	6800	GCA_011331065.1_ASM1133106v1_bin_7	6018	11426	HyAsP	6018	0.885	0.885	6018	0.527	0.661	0	0	no	3	0	yes	no	3	4	3	1
GCA_011331065.1_ASM1133106v1	CP049080.1	3372	not_detected	0	not_applicable	HyAsP	0	0	NA	0	NA	NA	not_applicable	not_applicable	no	0	0	no	no	NA	NA	NA	NA
GCA_011331065.1_ASM1133106v1	CP049084.1	3173	GCA_011331065.1_ASM1133106v1_bin_1	3173	3230	HyAsP	3173	1	1	3173	0.982	0.991	0	0	yes	0	0	no	no	NA	NA	NA	NA
GCA_011843745.2_ASM1184374v2	CP058232.1	94605	GCA_011843745.2_ASM1184374v2_bin_2	10599	10599	HyAsP	87379	0.923619259024364	0.112	10599	1	0.201	0	0	no	0	0	no	no	NA	NA	NA	NA
GCA_011843745.2_ASM1184374v2	CP058232.1	94605	GCA_011843745.2_ASM1184374v2_bin_5	19001	23083	HyAsP	87379	0.923619259024364	0.201	19001	0.823	0.323	0	0	no	0	0	no	no	NA	NA	NA	NA
GCA_011843745.2_ASM1184374v2	CP058232.1	94605	GCA_011843745.2_ASM1184374v2_bin_6	3375	13711	HyAsP	87379	0.923619259024364	0.036	3375	0.246	0.063	10336	0.753847275909853	no	0	0	no	no	NA	NA	NA	NA
GCA_011843745.2_ASM1184374v2	CP058232.1	94605	GCA_011843745.2_ASM1184374v2_bin_3	38790	41280	HyAsP	87379	0.923619259024364	0.41	38790	0.94	0.571	0	0	no	0	0	no	no	NA	NA	NA	NA
GCA_011843745.2_ASM1184374v2	CP058232.1	94605	GCA_011843745.2_ASM1184374v2_bin_4	15661	18108	HyAsP	87379	0.923619259024364	0.166	15661	0.865	0.279	0	0	no	0	0	no	no	NA	NA	NA	NA
GCA_011849985.2_ASM1184998v2	CP058234.1	94600	GCA_011849985.2_ASM1184998v2_bin_1	10599	10599	HyAsP	87375	0.923625792811839	0.112	10599	1	0.201	0	0	no	0	0	no	no	NA	NA	NA	NA
GCA_011849985.2_ASM1184998v2	CP058234.1	94600	GCA_011849985.2_ASM1184998v2_bin_5	12703	35947	HyAsP	87375	0.923625792811839	0.134	12703	0.353	0.194	20581	0.572537346649234	no	0	0	no	no	NA	NA	NA	NA
GCA_011849985.2_ASM1184998v2	CP058234.1	94600	GCA_011849985.2_ASM1184998v2_bin_3	59976	64784	HyAsP	87375	0.923625792811839	0.634	59976	0.926	0.753	1363	0.0210391454680168	no	0	0	no	no	NA	NA	NA	NA
GCA_011849985.2_ASM1184998v2	CP058234.1	94600	GCA_011849985.2_ASM1184998v2_bin_4	4097	5640	HyAsP	87375	0.923625792811839	0.043	4097	0.726	0.081	0	0	no	0	0	no	no	NA	NA	NA	NA
GCA_012044775.1_ASM1204477v1	CP050647.1	107449	GCA_012044775.1_ASM1204477v1_bin_2	4721	49670	HyAsP	105548	0.982307885601541	0.044	4721	0.095	0.06	43719	0.880189249043688	no	0	0	no	no	NA	NA	NA	NA
GCA_012044775.1_ASM1204477v1	CP050647.1	107449	GCA_012044775.1_ASM1204477v1_bin_5	10280	10280	HyAsP	105548	0.982307885601541	0.096	10280	1	0.175	0	0	no	0	0	no	no	NA	NA	NA	NA
GCA_012044775.1_ASM1204477v1	CP050647.1	107449	GCA_012044775.1_ASM1204477v1_bin_4	47814	74855	HyAsP	105548	0.982307885601541	0.445	47814	0.639	0.525	27027	0.361058045554739	no	0	0	no	no	NA	NA	NA	NA
GCA_012044775.1_ASM1204477v1	CP050647.1	107449	GCA_012044775.1_ASM1204477v1_bin_1	1096	1278	HyAsP	105548	0.982307885601541	0.01	1096	0.858	0.02	1096	0.857589984350548	no	0	0	no	no	NA	NA	NA	NA
GCA_012044775.1_ASM1204477v1	CP050647.1	107449	GCA_012044775.1_ASM1204477v1_bin_3	9685	18406	HyAsP	105548	0.982307885601541	0.09	9685	0.526	0.154	8721	0.473812887102032	no	0	0	no	no	NA	NA	NA	NA
GCA_012044775.1_ASM1204477v1	CP050647.1	107449	GCA_012044775.1_ASM1204477v1_bin_6	32154	32697	HyAsP	105548	0.982307885601541	0.299	32154	0.983	0.459	0	0	no	0	0	no	no	NA	NA	NA	NA
GCA_012221365.1_ASM1222136v1	CP050863.1	233798	GCA_012221365.1_ASM1222136v1_bin_5	19761	23396	HyAsP	175250	0.749578696139402	0.085	19761	0.845	0.154	0	0	no	0	0	no	no	NA	NA	NA	NA
GCA_012221365.1_ASM1222136v1	CP050863.1	233798	GCA_012221365.1_ASM1222136v1_bin_1	2990	2438	HyAsP	175250	0.749578696139402	0.013	1495	0.613	0.025	1495	0.613207547169811	no	0	0	no	no	NA	NA	NA	NA
GCA_012221365.1_ASM1222136v1	CP050863.1	233798	GCA_012221365.1_ASM1222136v1_bin_21	1497	1497	HyAsP	175250	0.749578696139402	0.006	1497	1	0.012	1497	1	no	0	0	no	no	NA	NA	NA	NA
GCA_012221365.1_ASM1222136v1	CP050863.1	233798	GCA_012221365.1_ASM1222136v1_bin_4	2898	1449	HyAsP	175250	0.749578696139402	0.012	1449	1	0.024	1449	1	no	0	0	no	no	NA	NA	NA	NA
GCA_012221365.1_ASM1222136v1	CP050863.1	233798	GCA_012221365.1_ASM1222136v1_bin_9	13830	16892	HyAsP	175250	0.749578696139402	0.059	13830	0.819	0.11	0	0	no	0	0	no	no	NA	NA	NA	NA
GCA_012221365.1_ASM1222136v1	CP050863.1	233798	GCA_012221365.1_ASM1222136v1_bin_13	5888	6266	HyAsP	175250	0.749578696139402	0.025	5888	0.94	0.049	0	0	no	0	0	no	no	NA	NA	NA	NA
GCA_012221365.1_ASM1222136v1	CP050863.1	233798	GCA_012221365.1_ASM1222136v1_bin_19	2566	5558	HyAsP	175250	0.749578696139402	0.011	2566	0.462	0.021	0	0	no	0	0	no	no	NA	NA	NA	NA
GCA_012221365.1_ASM1222136v1	CP050863.1	233798	GCA_012221365.1_ASM1222136v1_bin_6	1176	1325	HyAsP	175250	0.749578696139402	0.005	1176	0.888	0.01	1176	0.887547169811321	no	0	0	no	no	NA	NA	NA	NA
GCA_012221365.1_ASM1222136v1	CP050863.1	233798	GCA_012221365.1_ASM1222136v1_bin_2	32874	33414	HyAsP	175250	0.749578696139402	0.141	32874	0.984	0.247	0	0	no	0	0	no	no	NA	NA	NA	NA
GCA_012221365.1_ASM1222136v1	CP050863.1	233798	GCA_012221365.1_ASM1222136v1_bin_22	4693	6153	HyAsP	175250	0.749578696139402	0.02	3638	0.591	0.039	0	0	no	0	0	no	no	NA	NA	NA	NA
GCA_012221365.1_ASM1222136v1	CP050863.1	233798	GCA_012221365.1_ASM1222136v1_bin_20	1356	1356	HyAsP	175250	0.749578696139402	0.006	1356	1	0.012	0	0	no	0	0	no	no	NA	NA	NA	NA
GCA_012221365.1_ASM1222136v1	CP050863.1	233798	GCA_012221365.1_ASM1222136v1_bin_12	27968	26202	HyAsP	175250	0.749578696139402	0.12	24590	0.938	0.213	0	0	no	0	0	no	no	NA	NA	NA	NA
GCA_012221365.1_ASM1222136v1	CP050863.1	233798	GCA_012221365.1_ASM1222136v1_bin_8	2990	1644	HyAsP	175250	0.749578696139402	0.013	1495	0.909	0.026	1495	0.909367396593674	no	0	0	no	no	NA	NA	NA	NA
GCA_012221365.1_ASM1222136v1	CP050863.1	233798	GCA_012221365.1_ASM1222136v1_bin_24	4500	4010	HyAsP	175250	0.749578696139402	0.019	3169	0.79	0.037	1331	0.331920199501247	no	0	0	no	no	NA	NA	NA	NA
GCA_012221365.1_ASM1222136v1	CP050863.1	233798	GCA_012221365.1_ASM1222136v1_bin_14	2330	24498	HyAsP	175250	0.749578696139402	0.01	2330	0.095	0.018	18872	0.770348599885705	no	0	0	no	no	NA	NA	NA	NA
GCA_012221365.1_ASM1222136v1	CP050863.1	233798	GCA_012221365.1_ASM1222136v1_bin_10	42284	47029	HyAsP	175250	0.749578696139402	0.181	41229	0.877	0.3	0	0	no	0	0	no	no	NA	NA	NA	NA
GCA_012221365.1_ASM1222136v1	CP050863.1	233798	GCA_012221365.1_ASM1222136v1_bin_17	3745	5127	HyAsP	175250	0.749578696139402	0.016	3745	0.73	0.031	0	0	no	0	0	no	no	NA	NA	NA	NA
GCA_012221365.1_ASM1222136v1	CP050864.1	7120	not_detected	0	not_applicable	HyAsP	6719	0.943679775280899	NA	0	NA	NA	not_applicable	not_applicable	no	0	0	no	no	NA	NA	NA	NA
GCA_012221565.1_ASM1222156v1	CP050866.1	233800	GCA_012221565.1_ASM1222156v1_bin_16	1497	1497	HyAsP	175748	0.751702309666382	0.006	1497	1	0.012	1497	1	no	0	0	no	no	NA	NA	NA	NA
GCA_012221565.1_ASM1222156v1	CP050866.1	233800	GCA_012221565.1_ASM1222156v1_bin_2	60452	63735	HyAsP	175748	0.751702309666382	0.259	60452	0.948	0.407	0	0	no	0	0	no	no	NA	NA	NA	NA
GCA_012221565.1_ASM1222156v1	CP050866.1	233800	GCA_012221565.1_ASM1222156v1_bin_6	75984	76454	HyAsP	175748	0.751702309666382	0.325	71323	0.933	0.482	0	0	no	0	0	no	no	NA	NA	NA	NA
GCA_012221565.1_ASM1222156v1	CP050866.1	233800	GCA_012221565.1_ASM1222156v1_bin_1	2990	2438	HyAsP	175748	0.751702309666382	0.013	1495	0.613	0.025	1495	0.613207547169811	no	0	0	no	no	NA	NA	NA	NA
GCA_012221565.1_ASM1222156v1	CP050866.1	233800	GCA_012221565.1_ASM1222156v1_bin_15	2110	2034	HyAsP	175748	0.751702309666382	0.009	1055	0.519	0.018	0	0	no	0	0	no	no	NA	NA	NA	NA
GCA_012221565.1_ASM1222156v1	CP050866.1	233800	GCA_012221565.1_ASM1222156v1_bin_4	2898	1449	HyAsP	175748	0.751702309666382	0.012	1449	1	0.024	1449	1	no	0	0	no	no	NA	NA	NA	NA
GCA_012221565.1_ASM1222156v1	CP050866.1	233800	GCA_012221565.1_ASM1222156v1_bin_17	4992	5981	HyAsP	175748	0.751702309666382	0.021	3661	0.612	0.041	1331	0.222538037117539	no	0	0	no	no	NA	NA	NA	NA
GCA_012221565.1_ASM1222156v1	CP050866.1	233800	GCA_012221565.1_ASM1222156v1_bin_5	1176	1325	HyAsP	175748	0.751702309666382	0.005	1176	0.888	0.01	1176	0.887547169811321	no	0	0	no	no	NA	NA	NA	NA
GCA_012221565.1_ASM1222156v1	CP050866.1	233800	GCA_012221565.1_ASM1222156v1_bin_11	18805	23726	HyAsP	175748	0.751702309666382	0.08	18805	0.793	0.145	0	0	no	0	0	no	no	NA	NA	NA	NA
GCA_012221565.1_ASM1222156v1	CP050866.1	233800	GCA_012221565.1_ASM1222156v1_bin_8	2990	1644	HyAsP	175748	0.751702309666382	0.013	1495	0.909	0.026	1495	0.909367396593674	no	0	0	no	no	NA	NA	NA	NA
GCA_012221565.1_ASM1222156v1	CP050867.1	7413	not_detected	0	not_applicable	HyAsP	6719	0.906380682584649	NA	0	NA	NA	not_applicable	not_applicable	no	0	0	no	no	NA	NA	NA	NA
GCA_012849755.1_ASM1284975v1	CP051632.1	81965	GCA_012849755.1_ASM1284975v1_bin_4	6027	6027	HyAsP	48873	0.596266699200878	0.074	6027	1	0.138	0	0	no	0	0	no	no	NA	NA	NA	NA
GCA_012849755.1_ASM1284975v1	CP051632.1	81965	GCA_012849755.1_ASM1284975v1_bin_8	1907	3376	HyAsP	48873	0.596266699200878	0.023	1907	0.565	0.044	0	0	no	0	0	no	no	NA	NA	NA	NA
GCA_012849755.1_ASM1284975v1	CP051632.1	81965	GCA_012849755.1_ASM1284975v1_bin_6	3159	76655	HyAsP	48873	0.596266699200878	0.039	1578	0.021	0.027	76350	0.996021133650773	no	0	0	no	no	NA	NA	NA	NA
GCA_012849755.1_ASM1284975v1	CP051632.1	81965	GCA_012849755.1_ASM1284975v1_bin_5	1019	1689	HyAsP	48873	0.596266699200878	0.012	1019	0.603	0.024	1019	0.60331557134399	no	0	0	no	no	NA	NA	NA	NA
GCA_012849755.1_ASM1284975v1	CP051632.1	81965	GCA_012849755.1_ASM1284975v1_bin_2	1008	3391	HyAsP	48873	0.596266699200878	0.012	1008	0.297	0.023	2740	0.808021232674727	no	0	0	no	no	NA	NA	NA	NA
GCA_012849755.1_ASM1284975v1	CP051632.1	81965	GCA_012849755.1_ASM1284975v1_bin_3	3159	3325	HyAsP	48873	0.596266699200878	0.039	1578	0.475	0.072	1581	0.475488721804511	no	0	0	no	no	NA	NA	NA	NA
GCA_013372305.1_ASM1337230v1	CP054215.1	89178	GCA_013372305.1_ASM1337230v1_bin_4	4622	4622	HyAsP	77075	0.864282670613829	0.052	4622	1	0.099	0	0	no	6	0	yes	no	1	1	6	0.166666666666667
GCA_013372305.1_ASM1337230v1	CP054215.1	89178	GCA_013372305.1_ASM1337230v1_bin_15	7484	7801	HyAsP	77075	0.864282670613829	0.084	7484	0.959	0.154	0	0	no	6	0	yes	no	NA	NA	NA	NA
GCA_013372305.1_ASM1337230v1	CP054215.1	89178	GCA_013372305.1_ASM1337230v1_bin_12	4780	5064	HyAsP	77075	0.864282670613829	0.054	4780	0.944	0.102	0	0	no	6	0	yes	no	NA	NA	NA	NA
GCA_013372305.1_ASM1337230v1	CP054215.1	89178	GCA_013372305.1_ASM1337230v1_bin_10	6833	6833	HyAsP	77075	0.864282670613829	0.077	6833	1	0.143	0	0	no	6	0	yes	no	NA	NA	NA	NA
GCA_013372305.1_ASM1337230v1	CP054215.1	89178	GCA_013372305.1_ASM1337230v1_bin_14	1524	99539	HyAsP	77075	0.864282670613829	0.017	1524	0.015	0.016	91614	0.92038296547082	no	6	0	yes	no	NA	NA	NA	NA
GCA_013372305.1_ASM1337230v1	CP054215.1	89178	GCA_013372305.1_ASM1337230v1_bin_11	13520	13520	HyAsP	77075	0.864282670613829	0.152	13520	1	0.264	0	0	no	6	0	yes	no	NA	NA	NA	NA
GCA_013372305.1_ASM1337230v1	CP054215.1	89178	GCA_013372305.1_ASM1337230v1_bin_1	12519	13416	HyAsP	77075	0.864282670613829	0.14	12519	0.933	0.243	0	0	no	6	0	yes	no	1	1	6	0.166666666666667
GCA_013372305.1_ASM1337230v1	CP054215.1	89178	GCA_013372305.1_ASM1337230v1_bin_5	27453	28417	HyAsP	77075	0.864282670613829	0.308	27453	0.966	0.467	0	0	no	6	0	yes	no	4	4	6	0.666666666666667
GCA_013372305.1_ASM1337230v1	CP054216.1	88657	GCA_013372305.1_ASM1337230v1_bin_7	5100	6016	HyAsP	83003	0.93622612991642	0.058	5100	0.848	0.109	0	0	no	0	0	no	no	NA	NA	NA	NA
GCA_013372305.1_ASM1337230v1	CP054216.1	88657	GCA_013372305.1_ASM1337230v1_bin_3	5946	6363	HyAsP	83003	0.93622612991642	0.067	5946	0.934	0.125	0	0	no	0	0	no	no	NA	NA	NA	NA
GCA_013372305.1_ASM1337230v1	CP054216.1	88657	GCA_013372305.1_ASM1337230v1_bin_6	27070	27208	HyAsP	83003	0.93622612991642	0.305	27070	0.995	0.467	0	0	no	0	0	no	no	NA	NA	NA	NA
GCA_013372305.1_ASM1337230v1	CP054216.1	88657	GCA_013372305.1_ASM1337230v1_bin_9	44961	49419	HyAsP	83003	0.93622612991642	0.507	44961	0.91	0.651	1694	0.034278314008782	no	0	0	no	no	NA	NA	NA	NA
GCA_013372305.1_ASM1337230v1	CP054217.1	5167	GCA_013372305.1_ASM1337230v1_bin_2	5167	5244	HyAsP	5167	1	1	5167	0.985	0.992	0	0	yes	0	0	no	no	NA	NA	NA	NA
GCA_013372305.1_ASM1337230v1	CP054218.1	2113	not_detected	0	not_applicable	HyAsP	2113	1	NA	0	NA	NA	not_applicable	not_applicable	no	0	0	no	no	NA	NA	NA	NA
GCA_013372325.1_ASM1337232v1	CP054220.1	128954	GCA_013372325.1_ASM1337232v1_bin_7	11365	12257	HyAsP	116678	0.904803263179118	0.088	11365	0.927	0.161	0	0	no	1	0	yes	no	NA	NA	NA	NA
GCA_013372325.1_ASM1337232v1	CP054220.1	128954	GCA_013372325.1_ASM1337232v1_bin_10	3090	17111	HyAsP	116678	0.904803263179118	0.024	3090	0.181	0.042	0	0	no	1	0	yes	no	NA	NA	NA	NA
GCA_013372325.1_ASM1337232v1	CP054220.1	128954	GCA_013372325.1_ASM1337232v1_bin_9	9831	10832	HyAsP	116678	0.904803263179118	0.076	9831	0.908	0.14	0	0	no	1	0	yes	no	NA	NA	NA	NA
GCA_013372325.1_ASM1337232v1	CP054220.1	128954	GCA_013372325.1_ASM1337232v1_bin_12	4960	4179	HyAsP	116678	0.904803263179118	0.038	3816	0.913	0.073	0	0	no	1	0	yes	no	NA	NA	NA	NA
GCA_013372325.1_ASM1337232v1	CP054220.1	128954	GCA_013372325.1_ASM1337232v1_bin_8	8260	9858	HyAsP	116678	0.904803263179118	0.064	8260	0.838	0.119	0	0	no	1	0	yes	no	NA	NA	NA	NA
GCA_013372325.1_ASM1337232v1	CP054220.1	128954	GCA_013372325.1_ASM1337232v1_bin_5	7652	8662	HyAsP	116678	0.904803263179118	0.059	7652	0.883	0.111	0	0	no	1	0	yes	no	NA	NA	NA	NA
GCA_013372325.1_ASM1337232v1	CP054220.1	128954	GCA_013372325.1_ASM1337232v1_bin_18	3945	3945	HyAsP	116678	0.904803263179118	0.031	3945	1	0.06	0	0	no	1	0	yes	no	NA	NA	NA	NA
GCA_013372325.1_ASM1337232v1	CP054220.1	128954	GCA_013372325.1_ASM1337232v1_bin_21	15629	51922	HyAsP	116678	0.904803263179118	0.121	14485	0.279	0.169	33788	0.650745348792419	no	1	0	yes	no	1	1	1	1
GCA_013372325.1_ASM1337232v1	CP054220.1	128954	GCA_013372325.1_ASM1337232v1_bin_4	3273	3273	HyAsP	116678	0.904803263179118	0.025	3273	1	0.049	0	0	no	1	0	yes	no	NA	NA	NA	NA
GCA_013372325.1_ASM1337232v1	CP054220.1	128954	GCA_013372325.1_ASM1337232v1_bin_11	18197	28271	HyAsP	116678	0.904803263179118	0.141	18197	0.644	0.231	9194	0.325209578720243	no	1	0	yes	no	NA	NA	NA	NA
GCA_013372325.1_ASM1337232v1	CP054220.1	128954	GCA_013372325.1_ASM1337232v1_bin_2	2532	2532	HyAsP	116678	0.904803263179118	0.02	2532	1	0.039	2532	1	no	1	0	yes	no	NA	NA	NA	NA
GCA_013372325.1_ASM1337232v1	CP054220.1	128954	GCA_013372325.1_ASM1337232v1_bin_15	22928	23423	HyAsP	116678	0.904803263179118	0.178	22928	0.979	0.301	0	0	no	1	0	yes	no	NA	NA	NA	NA
GCA_013372325.1_ASM1337232v1	CP054220.1	128954	GCA_013372325.1_ASM1337232v1_bin_16	6250	6250	HyAsP	116678	0.904803263179118	0.048	6250	1	0.092	0	0	no	1	0	yes	no	NA	NA	NA	NA
GCA_013372325.1_ASM1337232v1	CP054220.1	128954	GCA_013372325.1_ASM1337232v1_bin_6	1340	3754	HyAsP	116678	0.904803263179118	0.01	1340	0.357	0.019	0	0	no	1	0	yes	no	NA	NA	NA	NA
GCA_013372325.1_ASM1337232v1	CP054221.1	86740	GCA_013372325.1_ASM1337232v1_bin_10	8680	17111	HyAsP	81162	0.935692875259396	0.1	8680	0.507	0.167	0	0	no	0	0	no	no	NA	NA	NA	NA
GCA_013372325.1_ASM1337232v1	CP054221.1	86740	GCA_013372325.1_ASM1337232v1_bin_14	64373	65564	HyAsP	81162	0.935692875259396	0.742	64373	0.982	0.845	0	0	no	0	0	no	no	NA	NA	NA	NA
GCA_013372325.1_ASM1337232v1	CP054221.1	86740	GCA_013372325.1_ASM1337232v1_bin_3	6371	6525	HyAsP	81162	0.935692875259396	0.073	6371	0.976	0.136	0	0	no	0	0	no	no	NA	NA	NA	NA
GCA_013372325.1_ASM1337232v1	CP054221.1	86740	GCA_013372325.1_ASM1337232v1_bin_6	1766	3754	HyAsP	81162	0.935692875259396	0.02	1766	0.47	0.038	0	0	no	0	0	no	no	NA	NA	NA	NA
GCA_013372325.1_ASM1337232v1	CP054222.1	5167	GCA_013372325.1_ASM1337232v1_bin_1	4379	5475	HyAsP	4379	0.84749371008322	0.847	4379	0.8	0.823	0	0	no	0	0	no	no	NA	NA	NA	NA
GCA_013372325.1_ASM1337232v1	CP054223.1	1506	not_detected	0	not_applicable	HyAsP	0	0	NA	0	NA	NA	not_applicable	not_applicable	no	0	0	no	no	NA	NA	NA	NA
GCA_013372345.1_ASM1337234v1	CP054225.1	123935	GCA_013372345.1_ASM1337234v1_bin_4	2602	2602	HyAsP	104454	0.842812764755719	0.021	2602	1	0.041	0	0	no	0	0	no	no	NA	NA	NA	NA
GCA_013372345.1_ASM1337234v1	CP054225.1	123935	GCA_013372345.1_ASM1337234v1_bin_6	9056	9056	HyAsP	104454	0.842812764755719	0.073	9056	1	0.136	0	0	no	0	0	no	no	NA	NA	NA	NA
GCA_013372345.1_ASM1337234v1	CP054225.1	123935	GCA_013372345.1_ASM1337234v1_bin_11	14565	25030	HyAsP	104454	0.842812764755719	0.118	14565	0.582	0.196	17926	0.71618058330004	no	0	0	no	no	NA	NA	NA	NA
GCA_013372345.1_ASM1337234v1	CP054225.1	123935	GCA_013372345.1_ASM1337234v1_bin_1	2700	2657	HyAsP	104454	0.842812764755719	0.022	1350	0.508	0.042	1350	0.508091832894242	no	0	0	no	no	NA	NA	NA	NA
GCA_013372345.1_ASM1337234v1	CP054225.1	123935	GCA_013372345.1_ASM1337234v1_bin_22	6081	7723	HyAsP	104454	0.842812764755719	0.049	6081	0.787	0.092	0	0	no	0	0	no	no	NA	NA	NA	NA
GCA_013372345.1_ASM1337234v1	CP054225.1	123935	GCA_013372345.1_ASM1337234v1_bin_16	8277	17558	HyAsP	104454	0.842812764755719	0.067	8277	0.471	0.117	17242	0.98200250598018	no	0	0	no	no	NA	NA	NA	NA
GCA_013372345.1_ASM1337234v1	CP054225.1	123935	GCA_013372345.1_ASM1337234v1_bin_7	2320	3850	HyAsP	104454	0.842812764755719	0.019	2320	0.603	0.037	3393	0.881298701298701	no	0	0	no	no	NA	NA	NA	NA
GCA_013372345.1_ASM1337234v1	CP054225.1	123935	GCA_013372345.1_ASM1337234v1_bin_9	1835	1835	HyAsP	104454	0.842812764755719	0.015	1835	1	0.03	0	0	no	0	0	no	no	NA	NA	NA	NA
GCA_013372345.1_ASM1337234v1	CP054225.1	123935	GCA_013372345.1_ASM1337234v1_bin_2	1553	2776	HyAsP	104454	0.842812764755719	0.013	1553	0.559	0.025	0	0	no	0	0	no	no	NA	NA	NA	NA
GCA_013372345.1_ASM1337234v1	CP054225.1	123935	GCA_013372345.1_ASM1337234v1_bin_25	3372	4288	HyAsP	104454	0.842812764755719	0.027	3372	0.786	0.052	0	0	no	0	0	no	no	NA	NA	NA	NA
GCA_013372345.1_ASM1337234v1	CP054225.1	123935	GCA_013372345.1_ASM1337234v1_bin_20	24314	27916	HyAsP	104454	0.842812764755719	0.196	24314	0.871	0.32	0	0	no	0	0	no	no	NA	NA	NA	NA
GCA_013372345.1_ASM1337234v1	CP054225.1	123935	GCA_013372345.1_ASM1337234v1_bin_8	10209	51228	HyAsP	104454	0.842812764755719	0.082	10209	0.199	0.116	40913	0.798645272116811	no	0	0	no	no	NA	NA	NA	NA
GCA_013372345.1_ASM1337234v1	CP054225.1	123935	GCA_013372345.1_ASM1337234v1_bin_17	22041	41698	HyAsP	104454	0.842812764755719	0.178	22041	0.529	0.266	19857	0.476209890162598	no	0	0	no	no	NA	NA	NA	NA
GCA_013372345.1_ASM1337234v1	CP054225.1	123935	GCA_013372345.1_ASM1337234v1_bin_18	1177	1177	HyAsP	104454	0.842812764755719	0.009	1177	1	0.018	0	0	no	0	0	no	no	NA	NA	NA	NA
GCA_013372345.1_ASM1337234v1	CP054226.1	5658	not_detected	0	not_applicable	HyAsP	5658	1	NA	0	NA	NA	not_applicable	not_applicable	no	0	0	no	no	NA	NA	NA	NA
GCA_013372365.1_ASM1337236v1	CP054228.1	135461	GCA_013372365.1_ASM1337236v1_bin_3	5919	6014	HyAsP	135104	0.997364555111803	0.044	5919	0.984	0.084	0	0	no	0	0	no	no	NA	NA	NA	NA
GCA_013372365.1_ASM1337236v1	CP054228.1	135461	GCA_013372365.1_ASM1337236v1_bin_5	43935	44098	HyAsP	135104	0.997364555111803	0.324	43935	0.996	0.489	0	0	no	0	0	no	no	NA	NA	NA	NA
GCA_013372365.1_ASM1337236v1	CP054228.1	135461	GCA_013372365.1_ASM1337236v1_bin_4	84153	84845	HyAsP	135104	0.997364555111803	0.621	84153	0.992	0.764	0	0	no	0	0	no	no	NA	NA	NA	NA
GCA_013372365.1_ASM1337236v1	CP054228.1	135461	GCA_013372365.1_ASM1337236v1_bin_1	1258	1412	HyAsP	135104	0.997364555111803	0.009	1258	0.891	0.018	1258	0.890934844192635	no	0	0	no	no	NA	NA	NA	NA
GCA_013372365.1_ASM1337236v1	CP054229.1	6431	GCA_013372365.1_ASM1337236v1_bin_2	6301	6549	HyAsP	6301	0.979785414399005	0.98	6301	0.962	0.971	0	0	yes	0	0	no	no	NA	NA	NA	NA
GCA_013372385.1_ASM1337238v1	CP054231.1	7154	not_detected	0	not_applicable	HyAsP	7154	1	NA	0	NA	NA	not_applicable	not_applicable	no	0	0	no	no	NA	NA	NA	NA
GCA_013372405.1_ASM1337240v1	CP054233.1	129632	GCA_013372405.1_ASM1337240v1_bin_9	68135	66860	HyAsP	115425	0.890405146877314	0.526	65999	0.987	0.686	0	0	no	1	0	yes	no	NA	NA	NA	NA
GCA_013372405.1_ASM1337240v1	CP054233.1	129632	GCA_013372405.1_ASM1337240v1_bin_8	4052	64608	HyAsP	115425	0.890405146877314	0.031	2895	0.045	0.037	58130	0.899733779098564	no	1	0	yes	no	NA	NA	NA	NA
GCA_013372405.1_ASM1337240v1	CP054233.1	129632	GCA_013372405.1_ASM1337240v1_bin_5	2066	2066	HyAsP	115425	0.890405146877314	0.016	2066	1	0.031	0	0	no	1	0	yes	no	NA	NA	NA	NA
GCA_013372405.1_ASM1337240v1	CP054233.1	129632	GCA_013372405.1_ASM1337240v1_bin_3	7629	8603	HyAsP	115425	0.890405146877314	0.059	7629	0.887	0.111	0	0	no	1	0	yes	no	NA	NA	NA	NA
GCA_013372405.1_ASM1337240v1	CP054233.1	129632	GCA_013372405.1_ASM1337240v1_bin_4	31385	34747	HyAsP	115425	0.890405146877314	0.242	30228	0.87	0.379	1065	0.0306501280686102	no	1	0	yes	no	1	1	1	1
GCA_013372405.1_ASM1337240v1	CP054233.1	129632	GCA_013372405.1_ASM1337240v1_bin_12	1065	3137	HyAsP	115425	0.890405146877314	0.008	1065	0.339	0.016	1065	0.339496334077144	no	1	0	yes	no	1	1	1	1
GCA_013372405.1_ASM1337240v1	CP054233.1	129632	GCA_013372405.1_ASM1337240v1_bin_10	4270	2288	HyAsP	115425	0.890405146877314	0.033	2134	0.933	0.064	0	0	no	1	0	yes	no	NA	NA	NA	NA
GCA_013372405.1_ASM1337240v1	CP054233.1	129632	GCA_013372405.1_ASM1337240v1_bin_7	4472	6486	HyAsP	115425	0.890405146877314	0.034	4472	0.689	0.065	0	0	no	1	0	yes	no	NA	NA	NA	NA
GCA_013372405.1_ASM1337240v1	CP054234.1	4072	GCA_013372405.1_ASM1337240v1_bin_2	4072	4149	HyAsP	4072	1	1	4072	0.981	0.99	0	0	yes	0	0	no	no	NA	NA	NA	NA
GCA_013372405.1_ASM1337240v1	CP054235.1	1551	not_detected	0	not_applicable	HyAsP	1551	1	NA	0	NA	NA	not_applicable	not_applicable	no	0	0	no	no	NA	NA	NA	NA
GCA_013372425.1_ASM1337242v1	CP054237.1	131660	GCA_013372425.1_ASM1337242v1_bin_6	29899	32088	HyAsP	122246	0.928497645450403	0.227	29899	0.932	0.365	0	0	no	7	0	yes	no	NA	NA	NA	NA
GCA_013372425.1_ASM1337242v1	CP054237.1	131660	GCA_013372425.1_ASM1337242v1_bin_7	1164	102295	HyAsP	122246	0.928497645450403	0.009	1164	0.011	0.01	99476	0.972442445867344	no	7	0	yes	no	NA	NA	NA	NA
GCA_013372425.1_ASM1337242v1	CP054237.1	131660	GCA_013372425.1_ASM1337242v1_bin_2	16810	16810	HyAsP	122246	0.928497645450403	0.128	16810	1	0.227	0	0	no	7	0	yes	no	3	3	7	0.428571428571429
GCA_013372425.1_ASM1337242v1	CP054237.1	131660	GCA_013372425.1_ASM1337242v1_bin_9	6594	10073	HyAsP	122246	0.928497645450403	0.05	6594	0.655	0.093	4069	0.403951156557133	no	7	0	yes	no	NA	NA	NA	NA
GCA_013372425.1_ASM1337242v1	CP054237.1	131660	GCA_013372425.1_ASM1337242v1_bin_4	3273	3381	HyAsP	122246	0.928497645450403	0.025	3273	0.968	0.049	0	0	no	7	0	yes	no	NA	NA	NA	NA
GCA_013372425.1_ASM1337242v1	CP054237.1	131660	GCA_013372425.1_ASM1337242v1_bin_11	2581	12041	HyAsP	122246	0.928497645450403	0.02	2581	0.214	0.037	11049	0.917614816045179	no	7	0	yes	no	NA	NA	NA	NA
GCA_013372425.1_ASM1337242v1	CP054237.1	131660	GCA_013372425.1_ASM1337242v1_bin_5	29806	31360	HyAsP	122246	0.928497645450403	0.226	29806	0.95	0.365	0	0	no	7	0	yes	no	NA	NA	NA	NA
GCA_013372425.1_ASM1337242v1	CP054237.1	131660	GCA_013372425.1_ASM1337242v1_bin_3	4204	4454	HyAsP	122246	0.928497645450403	0.032	4204	0.944	0.062	0	0	no	7	0	yes	no	NA	NA	NA	NA
GCA_013372425.1_ASM1337242v1	CP054238.1	1546	GCA_013372425.1_ASM1337242v1_bin_1	1472	1623	HyAsP	1472	0.952134540750323	0.952	1472	0.907	0.929	0	0	no	0	0	no	no	NA	NA	NA	NA
GCA_013374235.1_ASM1337423v1	AP023220.1	97234	GCA_013374235.1_ASM1337423v1_bin_11	1328	1663	HyAsP	60100	0.6180965505893	0.014	1328	0.799	0.028	1327	0.79795550210463	no	9	0	yes	no	NA	NA	NA	NA
GCA_013374235.1_ASM1337423v1	AP023220.1	97234	GCA_013374235.1_ASM1337423v1_bin_23	1981	7541	HyAsP	60100	0.6180965505893	0.02	1981	0.263	0.037	0	0	no	9	0	yes	no	1	1	9	0.111111111111111
GCA_013374235.1_ASM1337423v1	AP023220.1	97234	GCA_013374235.1_ASM1337423v1_bin_31	1368	1368	HyAsP	60100	0.6180965505893	0.014	1368	1	0.028	0	0	no	9	0	yes	no	NA	NA	NA	NA
GCA_013374235.1_ASM1337423v1	AP023220.1	97234	GCA_013374235.1_ASM1337423v1_bin_18	1598	2354	HyAsP	60100	0.6180965505893	0.016	1598	0.679	0.031	0	0	no	9	0	yes	no	1	1	9	0.111111111111111
GCA_013374235.1_ASM1337423v1	AP023220.1	97234	GCA_013374235.1_ASM1337423v1_bin_13	1909	67748	HyAsP	60100	0.6180965505893	0.02	1909	0.028	0.023	58908	0.869516443289839	no	9	0	yes	no	2	3	9	0.222222222222222
GCA_013374235.1_ASM1337423v1	AP023220.1	97234	GCA_013374235.1_ASM1337423v1_bin_6	1328	2388	HyAsP	60100	0.6180965505893	0.014	1328	0.556	0.027	1327	0.555695142378559	no	9	0	yes	no	NA	NA	NA	NA
GCA_013374235.1_ASM1337423v1	AP023220.1	97234	GCA_013374235.1_ASM1337423v1_bin_9	18635	18635	HyAsP	60100	0.6180965505893	0.192	18635	1	0.322	0	0	no	9	0	yes	no	3	3	9	0.333333333333333
GCA_013374235.1_ASM1337423v1	AP023220.1	97234	GCA_013374235.1_ASM1337423v1_bin_24	3503	3586	HyAsP	60100	0.6180965505893	0.036	3503	0.977	0.069	0	0	no	9	0	yes	no	NA	NA	NA	NA
GCA_013374235.1_ASM1337423v1	AP023220.1	97234	GCA_013374235.1_ASM1337423v1_bin_20	2126	2441	HyAsP	60100	0.6180965505893	0.022	2126	0.871	0.043	0	0	no	9	0	yes	no	NA	NA	NA	NA
GCA_013374235.1_ASM1337423v1	AP023220.1	97234	GCA_013374235.1_ASM1337423v1_bin_7	5044	5134	HyAsP	60100	0.6180965505893	0.052	5044	0.982	0.099	0	0	no	9	0	yes	no	NA	NA	NA	NA
GCA_013374235.1_ASM1337423v1	AP023220.1	97234	GCA_013374235.1_ASM1337423v1_bin_21	6080	103720	HyAsP	60100	0.6180965505893	0.063	6080	0.059	0.061	50957	0.49129386810644	no	9	0	yes	no	2	4	9	0.222222222222222
GCA_013374235.1_ASM1337423v1	AP023220.1	97234	GCA_013374235.1_ASM1337423v1_bin_12	3544	3544	HyAsP	60100	0.6180965505893	0.036	3544	1	0.069	0	0	no	9	0	yes	no	NA	NA	NA	NA
GCA_013374235.1_ASM1337423v1	AP023220.1	97234	GCA_013374235.1_ASM1337423v1_bin_16	2280	16710	HyAsP	60100	0.6180965505893	0.023	2280	0.136	0.039	0	0	no	9	0	yes	no	NA	NA	NA	NA
GCA_013374235.1_ASM1337423v1	AP023220.1	97234	GCA_013374235.1_ASM1337423v1_bin_26	4910	12244	HyAsP	60100	0.6180965505893	0.05	4910	0.401	0.089	0	0	no	9	0	yes	no	NA	NA	NA	NA
GCA_013374235.1_ASM1337423v1	AP023220.1	97234	GCA_013374235.1_ASM1337423v1_bin_4	3966	3966	HyAsP	60100	0.6180965505893	0.041	3966	1	0.079	0	0	no	9	0	yes	no	1	1	9	0.111111111111111
GCA_013374235.1_ASM1337423v1	AP023220.1	97234	GCA_013374235.1_ASM1337423v1_bin_10	2564	2564	HyAsP	60100	0.6180965505893	0.026	2564	1	0.051	0	0	no	9	0	yes	no	1	1	9	0.111111111111111
GCA_013374235.1_ASM1337423v1	AP023220.1	97234	GCA_013374235.1_ASM1337423v1_bin_29	2815	4076	HyAsP	60100	0.6180965505893	0.029	2815	0.691	0.056	0	0	no	9	0	yes	no	NA	NA	NA	NA
GCA_013374235.1_ASM1337423v1	AP023220.1	97234	GCA_013374235.1_ASM1337423v1_bin_19	1926	2993	HyAsP	60100	0.6180965505893	0.02	1926	0.644	0.039	0	0	no	9	0	yes	no	NA	NA	NA	NA
GCA_013374235.1_ASM1337423v1	AP023221.1	130968	GCA_013374235.1_ASM1337423v1_bin_22	5149	7329	HyAsP	96514	0.736928104575163	0.039	5149	0.703	0.074	5145	0.702005730659026	no	4	1	yes	yes	NA	NA	NA	NA
GCA_013374235.1_ASM1337423v1	AP023221.1	130968	GCA_013374235.1_ASM1337423v1_bin_23	6191	7541	HyAsP	96514	0.736928104575163	0.047	6191	0.821	0.089	0	0	no	4	1	yes	yes	1	1	4	0.25
GCA_013374235.1_ASM1337423v1	AP023221.1	130968	GCA_013374235.1_ASM1337423v1_bin_14	1070	50741	HyAsP	96514	0.736928104575163	0.008	1070	0.021	0.012	49157	0.968782641256578	no	4	1	yes	yes	NA	NA	NA	NA
GCA_013374235.1_ASM1337423v1	AP023221.1	130968	GCA_013374235.1_ASM1337423v1_bin_24	2279	3586	HyAsP	96514	0.736928104575163	0.017	2279	0.636	0.033	0	0	no	4	1	yes	yes	NA	NA	NA	NA
GCA_013374235.1_ASM1337423v1	AP023221.1	130968	GCA_013374235.1_ASM1337423v1_bin_30	1749	1749	HyAsP	96514	0.736928104575163	0.013	1749	1	0.026	0	0	no	4	1	yes	yes	NA	NA	NA	NA
GCA_013374235.1_ASM1337423v1	AP023221.1	130968	GCA_013374235.1_ASM1337423v1_bin_20	2130	2441	HyAsP	96514	0.736928104575163	0.016	2130	0.873	0.031	0	0	no	4	1	yes	yes	NA	NA	NA	NA
GCA_013374235.1_ASM1337423v1	AP023221.1	130968	GCA_013374235.1_ASM1337423v1_bin_21	49253	103720	HyAsP	96514	0.736928104575163	0.376	49253	0.475	0.42	50957	0.49129386810644	no	4	1	yes	yes	3	4	4	0.75
GCA_013374235.1_ASM1337423v1	AP023221.1	130968	GCA_013374235.1_ASM1337423v1_bin_16	15974	16710	HyAsP	96514	0.736928104575163	0.122	15974	0.956	0.216	0	0	no	4	1	yes	yes	NA	NA	NA	NA
GCA_013374235.1_ASM1337423v1	AP023221.1	130968	GCA_013374235.1_ASM1337423v1_bin_26	2130	12244	HyAsP	96514	0.736928104575163	0.016	2130	0.174	0.029	0	0	no	4	1	yes	yes	NA	NA	NA	NA
GCA_013374235.1_ASM1337423v1	AP023221.1	130968	GCA_013374235.1_ASM1337423v1_bin_8	2825	3963	HyAsP	96514	0.736928104575163	0.022	2825	0.713	0.043	0	0	no	4	1	yes	yes	NA	NA	NA	NA
GCA_013374235.1_ASM1337423v1	AP023221.1	130968	GCA_013374235.1_ASM1337423v1_bin_5	11733	14024	HyAsP	96514	0.736928104575163	0.09	11733	0.837	0.163	3278	0.23374215630348	no	4	1	yes	yes	1	1	4	0.25
GCA_013374235.1_ASM1337423v1	AP023222.1	98308	GCA_013374235.1_ASM1337423v1_bin_15	88426	110743	HyAsP	96020	0.976726207429711	0.899	88426	0.798	0.845	21962	0.198315017653486	no	0	0	no	no	NA	NA	NA	NA
GCA_013374235.1_ASM1337423v1	AP023222.1	98308	GCA_013374235.1_ASM1337423v1_bin_28	7594	8347	HyAsP	96020	0.976726207429711	0.077	7594	0.91	0.142	0	0	no	0	0	no	no	NA	NA	NA	NA
GCA_013374235.1_ASM1337423v1	AP023223.1	2188	GCA_013374235.1_ASM1337423v1_bin_1	2101	2178	HyAsP	2101	0.960237659963437	0.96	2101	0.965	0.962	0	0	yes	0	0	no	no	NA	NA	NA	NA
GCA_013374255.1_ASM1337425v1	AP023225.1	108281	GCA_013374255.1_ASM1337425v1_bin_6	19365	19008	HyAsP	92409	0.85341842059087	0.179	16664	0.877	0.297	0	0	no	19	1	yes	yes	7	7	19	0.368421052631579
GCA_013374255.1_ASM1337425v1	AP023225.1	108281	GCA_013374255.1_ASM1337425v1_bin_2	1720	3771	HyAsP	92409	0.85341842059087	0.016	1720	0.456	0.031	1175	0.311588438080085	no	19	1	yes	yes	NA	NA	NA	NA
GCA_013374255.1_ASM1337425v1	AP023225.1	108281	GCA_013374255.1_ASM1337425v1_bin_3	2934	2934	HyAsP	92409	0.85341842059087	0.027	2934	1	0.053	0	0	no	19	1	yes	yes	1	1	19	0.0526315789473684
GCA_013374255.1_ASM1337425v1	AP023225.1	108281	GCA_013374255.1_ASM1337425v1_bin_10	2336	2336	HyAsP	92409	0.85341842059087	0.022	2336	1	0.043	0	0	no	19	1	yes	yes	2	2	19	0.105263157894737
GCA_013374255.1_ASM1337425v1	AP023225.1	108281	GCA_013374255.1_ASM1337425v1_bin_7	30532	32055	HyAsP	92409	0.85341842059087	0.282	30532	0.952	0.435	0	0	no	19	1	yes	yes	NA	NA	NA	NA
GCA_013374255.1_ASM1337425v1	AP023225.1	108281	GCA_013374255.1_ASM1337425v1_bin_15	7226	6258	HyAsP	92409	0.85341842059087	0.067	4525	0.723	0.123	0	0	no	19	1	yes	yes	4	4	19	0.210526315789474
GCA_013374255.1_ASM1337425v1	AP023225.1	108281	GCA_013374255.1_ASM1337425v1_bin_4	12499	12499	HyAsP	92409	0.85341842059087	0.115	12499	1	0.206	0	0	no	19	1	yes	yes	5	5	19	0.263157894736842
GCA_013374255.1_ASM1337425v1	AP023225.1	108281	GCA_013374255.1_ASM1337425v1_bin_11	21197	23647	HyAsP	92409	0.85341842059087	0.196	21197	0.896	0.322	1569	0.0663509113206749	no	19	1	yes	yes	NA	NA	NA	NA
GCA_013374275.1_ASM1337427v1	AP023227.1	44962	GCA_013374275.1_ASM1337427v1_bin_13	5448	5448	HyAsP	43924	0.976913838352386	0.121	5448	1	0.216	0	0	no	2	0	yes	no	NA	NA	NA	NA
GCA_013374275.1_ASM1337427v1	AP023227.1	44962	GCA_013374275.1_ASM1337427v1_bin_12	38530	39361	HyAsP	43924	0.976913838352386	0.857	38530	0.979	0.914	0	0	no	2	0	yes	no	2	2	2	1
GCA_013374275.1_ASM1337427v1	AP023228.1	170909	GCA_013374275.1_ASM1337427v1_bin_5	7890	9429	HyAsP	153708	0.89935579752968	0.046	7890	0.837	0.087	2700	0.286350620426344	no	10	1	yes	yes	1	1	10	0.1
GCA_013374275.1_ASM1337427v1	AP023228.1	170909	GCA_013374275.1_ASM1337427v1_bin_3	6486	6815	HyAsP	153708	0.89935579752968	0.038	6486	0.952	0.073	0	0	no	10	1	yes	yes	NA	NA	NA	NA
GCA_013374275.1_ASM1337427v1	AP023228.1	170909	GCA_013374275.1_ASM1337427v1_bin_22	10132	36594	HyAsP	153708	0.89935579752968	0.059	10132	0.277	0.097	26727	0.730365633710444	no	10	1	yes	yes	NA	NA	NA	NA
GCA_013374275.1_ASM1337427v1	AP023228.1	170909	GCA_013374275.1_ASM1337427v1_bin_7	22402	22880	HyAsP	153708	0.89935579752968	0.131	22402	0.979	0.231	4828	0.211013986013986	no	10	1	yes	yes	1	1	10	0.1
GCA_013374275.1_ASM1337427v1	AP023228.1	170909	GCA_013374275.1_ASM1337427v1_bin_19	4519	9236	HyAsP	153708	0.89935579752968	0.026	4519	0.489	0.049	3718	0.402555218709398	no	10	1	yes	yes	1	1	10	0.1
GCA_013374275.1_ASM1337427v1	AP023228.1	170909	GCA_013374275.1_ASM1337427v1_bin_18	9644	10797	HyAsP	153708	0.89935579752968	0.056	9644	0.893	0.105	0	0	no	10	1	yes	yes	NA	NA	NA	NA
GCA_013374275.1_ASM1337427v1	AP023228.1	170909	GCA_013374275.1_ASM1337427v1_bin_16	1365	2218	HyAsP	153708	0.89935579752968	0.008	1365	0.615	0.016	0	0	no	10	1	yes	yes	NA	NA	NA	NA
GCA_013374275.1_ASM1337427v1	AP023228.1	170909	GCA_013374275.1_ASM1337427v1_bin_11	15672	15672	HyAsP	153708	0.89935579752968	0.092	15672	1	0.168	0	0	no	10	1	yes	yes	NA	NA	NA	NA
GCA_013374275.1_ASM1337427v1	AP023228.1	170909	GCA_013374275.1_ASM1337427v1_bin_21	7485	11319	HyAsP	153708	0.89935579752968	0.044	7485	0.661	0.083	2772	0.244897959183673	no	10	1	yes	yes	NA	NA	NA	NA
GCA_013374275.1_ASM1337427v1	AP023228.1	170909	GCA_013374275.1_ASM1337427v1_bin_8	2338	2800	HyAsP	153708	0.89935579752968	0.014	2338	0.835	0.028	0	0	no	10	1	yes	yes	2	2	10	0.2
GCA_013374275.1_ASM1337427v1	AP023228.1	170909	GCA_013374275.1_ASM1337427v1_bin_2	11094	11094	HyAsP	153708	0.89935579752968	0.065	11094	1	0.122	0	0	no	10	1	yes	yes	4	4	10	0.4
GCA_013374275.1_ASM1337427v1	AP023228.1	170909	GCA_013374275.1_ASM1337427v1_bin_9	13722	13722	HyAsP	153708	0.89935579752968	0.08	13722	1	0.148	0	0	no	10	1	yes	yes	NA	NA	NA	NA
GCA_013374275.1_ASM1337427v1	AP023228.1	170909	GCA_013374275.1_ASM1337427v1_bin_17	4217	4217	HyAsP	153708	0.89935579752968	0.025	4217	1	0.049	0	0	no	10	1	yes	yes	1	1	10	0.1
GCA_013374275.1_ASM1337427v1	AP023228.1	170909	GCA_013374275.1_ASM1337427v1_bin_10	45805	47439	HyAsP	153708	0.89935579752968	0.268	45805	0.966	0.42	1444	0.0304390902000464	no	10	1	yes	yes	NA	NA	NA	NA
GCA_013374275.1_ASM1337427v1	AP023229.1	32452	GCA_013374275.1_ASM1337427v1_bin_4	32101	32759	HyAsP	32101	0.989184025637865	0.989	32101	0.98	0.984	0	0	yes	0	0	no	no	NA	NA	NA	NA
GCA_013374295.1_ASM1337429v1	AP023231.1	83461	GCA_013374295.1_ASM1337429v1_bin_22	1368	1368	HyAsP	51718	0.619666670660548	0.016	1368	1	0.031	0	0	no	5	0	yes	no	NA	NA	NA	NA
GCA_013374295.1_ASM1337429v1	AP023231.1	83461	GCA_013374295.1_ASM1337429v1_bin_3	16756	17085	HyAsP	51718	0.619666670660548	0.201	16756	0.981	0.334	0	0	no	5	0	yes	no	NA	NA	NA	NA
GCA_013374295.1_ASM1337429v1	AP023231.1	83461	GCA_013374295.1_ASM1337429v1_bin_5	17996	23122	HyAsP	51718	0.619666670660548	0.216	17996	0.778	0.338	0	0	no	5	0	yes	no	5	5	5	1
GCA_013374295.1_ASM1337429v1	AP023231.1	83461	GCA_013374295.1_ASM1337429v1_bin_9	1824	10180	HyAsP	51718	0.619666670660548	0.022	1824	0.179	0.039	1823	0.179076620825147	no	5	0	yes	no	NA	NA	NA	NA
GCA_013374295.1_ASM1337429v1	AP023231.1	83461	GCA_013374295.1_ASM1337429v1_bin_12	8306	16098	HyAsP	51718	0.619666670660548	0.1	8306	0.516	0.168	0	0	no	5	0	yes	no	NA	NA	NA	NA
GCA_013374295.1_ASM1337429v1	AP023231.1	83461	GCA_013374295.1_ASM1337429v1_bin_25	1824	5640	HyAsP	51718	0.619666670660548	0.022	1824	0.323	0.041	1823	0.32322695035461	no	5	0	yes	no	NA	NA	NA	NA
GCA_013374295.1_ASM1337429v1	AP023231.1	83461	GCA_013374295.1_ASM1337429v1_bin_18	3508	56111	HyAsP	51718	0.619666670660548	0.042	3508	0.063	0.05	43841	0.781326299656039	no	5	0	yes	no	NA	NA	NA	NA
GCA_013374295.1_ASM1337429v1	AP023231.1	83461	GCA_013374295.1_ASM1337429v1_bin_11	2123	2441	HyAsP	51718	0.619666670660548	0.025	2123	0.87	0.049	0	0	no	5	0	yes	no	NA	NA	NA	NA
GCA_013374295.1_ASM1337429v1	AP023231.1	83461	GCA_013374295.1_ASM1337429v1_bin_19	1580	2419	HyAsP	51718	0.619666670660548	0.019	1580	0.653	0.037	0	0	no	5	0	yes	no	NA	NA	NA	NA
GCA_013374295.1_ASM1337429v1	AP023232.1	130952	GCA_013374295.1_ASM1337429v1_bin_5	2539	23122	HyAsP	96240	0.734925774329525	0.019	2539	0.11	0.032	0	0	no	4	1	yes	yes	NA	NA	NA	NA
GCA_013374295.1_ASM1337429v1	AP023232.1	130952	GCA_013374295.1_ASM1337429v1_bin_9	9269	10180	HyAsP	96240	0.734925774329525	0.071	9269	0.911	0.132	1823	0.179076620825147	no	4	1	yes	yes	NA	NA	NA	NA
GCA_013374295.1_ASM1337429v1	AP023232.1	130952	GCA_013374295.1_ASM1337429v1_bin_16	23806	32020	HyAsP	96240	0.734925774329525	0.182	23806	0.743	0.292	6358	0.198563397876327	no	4	1	yes	yes	3	3	4	0.75
GCA_013374295.1_ASM1337429v1	AP023232.1	130952	GCA_013374295.1_ASM1337429v1_bin_2	7394	7394	HyAsP	96240	0.734925774329525	0.056	7394	1	0.106	0	0	no	4	1	yes	yes	NA	NA	NA	NA
GCA_013374295.1_ASM1337429v1	AP023232.1	130952	GCA_013374295.1_ASM1337429v1_bin_13	2691	3549	HyAsP	96240	0.734925774329525	0.021	2691	0.758	0.041	2689	0.757678219216681	no	4	1	yes	yes	NA	NA	NA	NA
GCA_013374295.1_ASM1337429v1	AP023232.1	130952	GCA_013374295.1_ASM1337429v1_bin_12	8828	16098	HyAsP	96240	0.734925774329525	0.067	8828	0.548	0.119	0	0	no	4	1	yes	yes	NA	NA	NA	NA
GCA_013374295.1_ASM1337429v1	AP023232.1	130952	GCA_013374295.1_ASM1337429v1_bin_20	25728	25728	HyAsP	96240	0.734925774329525	0.196	25728	1	0.328	0	0	no	4	1	yes	yes	NA	NA	NA	NA
GCA_013374295.1_ASM1337429v1	AP023232.1	130952	GCA_013374295.1_ASM1337429v1_bin_25	1824	5640	HyAsP	96240	0.734925774329525	0.014	1824	0.323	0.027	1823	0.32322695035461	no	4	1	yes	yes	NA	NA	NA	NA
GCA_013374295.1_ASM1337429v1	AP023232.1	130952	GCA_013374295.1_ASM1337429v1_bin_18	2278	56111	HyAsP	96240	0.734925774329525	0.017	2278	0.041	0.024	43841	0.781326299656039	no	4	1	yes	yes	NA	NA	NA	NA
GCA_013374295.1_ASM1337429v1	AP023232.1	130952	GCA_013374295.1_ASM1337429v1_bin_21	1749	2887	HyAsP	96240	0.734925774329525	0.013	1749	0.606	0.025	0	0	no	4	1	yes	yes	NA	NA	NA	NA
GCA_013374295.1_ASM1337429v1	AP023232.1	130952	GCA_013374295.1_ASM1337429v1_bin_11	2130	2441	HyAsP	96240	0.734925774329525	0.016	2130	0.873	0.031	0	0	no	4	1	yes	yes	NA	NA	NA	NA
GCA_013374295.1_ASM1337429v1	AP023232.1	130952	GCA_013374295.1_ASM1337429v1_bin_24	2116	50950	HyAsP	96240	0.734925774329525	0.016	2116	0.042	0.023	48457	0.951069676153091	no	4	1	yes	yes	NA	NA	NA	NA
GCA_013374295.1_ASM1337429v1	AP023232.1	130952	GCA_013374295.1_ASM1337429v1_bin_4	7243	9455	HyAsP	96240	0.734925774329525	0.055	7243	0.766	0.103	3278	0.346694870438921	no	4	1	yes	yes	1	1	4	0.25
GCA_013374295.1_ASM1337429v1	AP023233.1	98309	GCA_013374295.1_ASM1337429v1_bin_18	7594	56111	HyAsP	96017	0.976685756136264	0.077	7594	0.135	0.098	43841	0.781326299656039	no	0	0	no	no	NA	NA	NA	NA
GCA_013374295.1_ASM1337429v1	AP023233.1	98309	GCA_013374295.1_ASM1337429v1_bin_7	88423	111140	HyAsP	96017	0.976685756136264	0.899	88423	0.796	0.844	21962	0.197606622278208	no	0	0	no	no	NA	NA	NA	NA
GCA_013374295.1_ASM1337429v1	AP023234.1	2153	not_detected	0	not_applicable	HyAsP	0	0	NA	0	NA	NA	not_applicable	not_applicable	no	0	0	no	no	NA	NA	NA	NA
GCA_013374315.1_ASM1337431v1	AP023236.1	94613	GCA_013374315.1_ASM1337431v1_bin_3	5044	5856	HyAsP	89588	0.946888905330134	0.053	5044	0.861	0.1	0	0	no	9	0	yes	no	NA	NA	NA	NA
GCA_013374315.1_ASM1337431v1	AP023236.1	94613	GCA_013374315.1_ASM1337431v1_bin_1	2566	2566	HyAsP	89588	0.946888905330134	0.027	2566	1	0.053	0	0	no	9	0	yes	no	1	1	9	0.111111111111111
GCA_013374315.1_ASM1337431v1	AP023236.1	94613	GCA_013374315.1_ASM1337431v1_bin_8	29425	29602	HyAsP	89588	0.946888905330134	0.311	29425	0.994	0.474	0	0	no	9	0	yes	no	NA	NA	NA	NA
GCA_013374315.1_ASM1337431v1	AP023236.1	94613	GCA_013374315.1_ASM1337431v1_bin_9	16245	16245	HyAsP	89588	0.946888905330134	0.172	16245	1	0.294	0	0	no	9	0	yes	no	NA	NA	NA	NA
GCA_013374315.1_ASM1337431v1	AP023236.1	94613	GCA_013374315.1_ASM1337431v1_bin_5	9826	9826	HyAsP	89588	0.946888905330134	0.104	9826	1	0.188	0	0	no	9	0	yes	no	5	5	9	0.555555555555556
GCA_013374315.1_ASM1337431v1	AP023236.1	94613	GCA_013374315.1_ASM1337431v1_bin_2	9448	10007	HyAsP	89588	0.946888905330134	0.1	9448	0.944	0.181	0	0	no	9	0	yes	no	3	3	9	0.333333333333333
GCA_013374315.1_ASM1337431v1	AP023236.1	94613	GCA_013374315.1_ASM1337431v1_bin_4	2968	3361	HyAsP	89588	0.946888905330134	0.031	2968	0.883	0.06	0	0	no	9	0	yes	no	NA	NA	NA	NA
GCA_013374315.1_ASM1337431v1	AP023236.1	94613	GCA_013374315.1_ASM1337431v1_bin_7	14101	14101	HyAsP	89588	0.946888905330134	0.149	14101	1	0.259	0	0	no	9	0	yes	no	NA	NA	NA	NA
GCA_013376575.1_ASM1337657v1	CP049968.1	230339	GCA_013376575.1_ASM1337657v1_bin_6	38385	43907	HyAsP	217602	0.944703241743691	0.167	38385	0.874	0.28	0	0	no	4	1	yes	yes	1	1	4	0.25
GCA_013376575.1_ASM1337657v1	CP049968.1	230339	GCA_013376575.1_ASM1337657v1_bin_9	2071	2071	HyAsP	217602	0.944703241743691	0.009	2071	1	0.018	0	0	no	4	1	yes	yes	NA	NA	NA	NA
GCA_013376575.1_ASM1337657v1	CP049968.1	230339	GCA_013376575.1_ASM1337657v1_bin_14	4210	4210	HyAsP	217602	0.944703241743691	0.018	4210	1	0.035	0	0	no	4	1	yes	yes	NA	NA	NA	NA
GCA_013376575.1_ASM1337657v1	CP049968.1	230339	GCA_013376575.1_ASM1337657v1_bin_5	3522	45225	HyAsP	217602	0.944703241743691	0.015	3522	0.078	0.025	0	0	no	4	1	yes	yes	NA	NA	NA	NA
GCA_013376575.1_ASM1337657v1	CP049968.1	230339	GCA_013376575.1_ASM1337657v1_bin_10	107910	112802	HyAsP	217602	0.944703241743691	0.468	107910	0.957	0.629	1011	0.00896260704597436	no	4	1	yes	yes	NA	NA	NA	NA
GCA_013376575.1_ASM1337657v1	CP049968.1	230339	GCA_013376575.1_ASM1337657v1_bin_12	4479	4479	HyAsP	217602	0.944703241743691	0.019	4479	1	0.037	0	0	no	4	1	yes	yes	NA	NA	NA	NA
GCA_013376575.1_ASM1337657v1	CP049968.1	230339	GCA_013376575.1_ASM1337657v1_bin_11	42029	55599	HyAsP	217602	0.944703241743691	0.182	42029	0.756	0.293	8029	0.144409072105613	no	4	1	yes	yes	NA	NA	NA	NA
GCA_013376575.1_ASM1337657v1	CP049968.1	230339	GCA_013376575.1_ASM1337657v1_bin_4	12667	26628	HyAsP	217602	0.944703241743691	0.055	12667	0.476	0.099	13961	0.524297731710981	no	4	1	yes	yes	2	2	4	0.5
GCA_013376575.1_ASM1337657v1	CP049968.1	230339	GCA_013376575.1_ASM1337657v1_bin_15	2980	4464	HyAsP	217602	0.944703241743691	0.013	2980	0.668	0.026	0	0	no	4	1	yes	yes	NA	NA	NA	NA
GCA_013376575.1_ASM1337657v1	CP049969.1	139294	GCA_013376575.1_ASM1337657v1_bin_6	3056	43907	HyAsP	130744	0.938619035995807	0.022	3056	0.07	0.033	0	0	no	5	0	yes	no	NA	NA	NA	NA
GCA_013376575.1_ASM1337657v1	CP049969.1	139294	GCA_013376575.1_ASM1337657v1_bin_2	4799	8102	HyAsP	130744	0.938619035995807	0.034	4799	0.592	0.064	0	0	no	5	0	yes	no	NA	NA	NA	NA
GCA_013376575.1_ASM1337657v1	CP049969.1	139294	GCA_013376575.1_ASM1337657v1_bin_5	24583	45225	HyAsP	130744	0.938619035995807	0.176	24583	0.544	0.266	0	0	no	5	0	yes	no	1	1	5	0.2
GCA_013376575.1_ASM1337657v1	CP049969.1	139294	GCA_013376575.1_ASM1337657v1_bin_10	1643	112802	HyAsP	130744	0.938619035995807	0.012	1643	0.015	0.013	1011	0.00896260704597436	no	5	0	yes	no	1	1	5	0.2
GCA_013376575.1_ASM1337657v1	CP049969.1	139294	GCA_013376575.1_ASM1337657v1_bin_15	1190	4464	HyAsP	130744	0.938619035995807	0.009	1190	0.267	0.017	0	0	no	5	0	yes	no	1	1	5	0.2
GCA_013376575.1_ASM1337657v1	CP049969.1	139294	GCA_013376575.1_ASM1337657v1_bin_8	83421	84022	HyAsP	130744	0.938619035995807	0.599	83421	0.993	0.747	0	0	no	5	0	yes	no	NA	NA	NA	NA
GCA_013376575.1_ASM1337657v1	CP049969.1	139294	GCA_013376575.1_ASM1337657v1_bin_3	10226	11974	HyAsP	130744	0.938619035995807	0.073	10226	0.854	0.135	0	0	no	5	0	yes	no	2	2	5	0.4
GCA_013376575.1_ASM1337657v1	CP049970.1	101847	GCA_013376575.1_ASM1337657v1_bin_2	3303	8102	HyAsP	93873	0.921706088544582	0.032	3303	0.408	0.059	0	0	no	1	0	yes	no	NA	NA	NA	NA
GCA_013376575.1_ASM1337657v1	CP049970.1	101847	GCA_013376575.1_ASM1337657v1_bin_7	73144	73753	HyAsP	93873	0.921706088544582	0.718	73144	0.992	0.833	2581	0.0349951866364758	no	1	0	yes	no	NA	NA	NA	NA
GCA_013376575.1_ASM1337657v1	CP049970.1	101847	GCA_013376575.1_ASM1337657v1_bin_5	12561	45225	HyAsP	93873	0.921706088544582	0.123	12561	0.278	0.171	0	0	no	1	0	yes	no	NA	NA	NA	NA
GCA_013376575.1_ASM1337657v1	CP049970.1	101847	GCA_013376575.1_ASM1337657v1_bin_10	1942	112802	HyAsP	93873	0.921706088544582	0.019	1942	0.017	0.018	1011	0.00896260704597436	no	1	0	yes	no	NA	NA	NA	NA
GCA_013376575.1_ASM1337657v1	CP049970.1	101847	GCA_013376575.1_ASM1337657v1_bin_11	2832	55599	HyAsP	93873	0.921706088544582	0.028	2832	0.051	0.036	8029	0.144409072105613	no	1	0	yes	no	NA	NA	NA	NA
GCA_013376575.1_ASM1337657v1	CP049971.1	4145	not_detected	0	not_applicable	HyAsP	4073	0.982629674306393	NA	0	NA	NA	not_applicable	not_applicable	no	0	0	no	no	NA	NA	NA	NA
GCA_013376575.1_ASM1337657v1	CP049972.1	3359	not_detected	0	not_applicable	HyAsP	3359	1	NA	0	NA	NA	not_applicable	not_applicable	no	0	0	no	no	NA	NA	NA	NA
GCA_013376575.1_ASM1337657v1	CP049973.1	2883	not_detected	0	not_applicable	HyAsP	2811	0.975026014568158	NA	0	NA	NA	not_applicable	not_applicable	no	0	0	no	no	NA	NA	NA	NA
GCA_013376575.1_ASM1337657v1	CP049974.1	1934	not_detected	0	not_applicable	HyAsP	0	0	NA	0	NA	NA	not_applicable	not_applicable	no	0	0	no	no	NA	NA	NA	NA
GCA_013376575.1_ASM1337657v1	CP049975.1	1780	not_detected	0	not_applicable	HyAsP	1770	0.99438202247191	NA	0	NA	NA	not_applicable	not_applicable	no	0	0	no	no	NA	NA	NA	NA
GCA_013426075.1_ASM1342607v1	CP058653.1	154098	GCA_013426075.1_ASM1342607v1_bin_13	15970	16601	HyAsP	143042	0.928253449103817	0.104	15970	0.962	0.188	0	0	no	4	0	yes	no	2	2	4	0.5
GCA_013426075.1_ASM1342607v1	CP058653.1	154098	GCA_013426075.1_ASM1342607v1_bin_19	5635	6851	HyAsP	143042	0.928253449103817	0.037	5635	0.823	0.071	1954	0.285213837396001	no	4	0	yes	no	NA	NA	NA	NA
GCA_013426075.1_ASM1342607v1	CP058653.1	154098	GCA_013426075.1_ASM1342607v1_bin_6	1793	1793	HyAsP	143042	0.928253449103817	0.012	1793	1	0.024	0	0	no	4	0	yes	no	1	1	4	0.25
GCA_013426075.1_ASM1342607v1	CP058653.1	154098	GCA_013426075.1_ASM1342607v1_bin_12	57799	58989	HyAsP	143042	0.928253449103817	0.375	57799	0.98	0.542	0	0	no	4	0	yes	no	1	1	4	0.25
GCA_013426075.1_ASM1342607v1	CP058653.1	154098	GCA_013426075.1_ASM1342607v1_bin_20	6773	6947	HyAsP	143042	0.928253449103817	0.044	6773	0.975	0.084	0	0	no	4	0	yes	no	NA	NA	NA	NA
GCA_013426075.1_ASM1342607v1	CP058653.1	154098	GCA_013426075.1_ASM1342607v1_bin_21	1366	2219	HyAsP	143042	0.928253449103817	0.009	1366	0.616	0.018	0	0	no	4	0	yes	no	NA	NA	NA	NA
GCA_013426075.1_ASM1342607v1	CP058653.1	154098	GCA_013426075.1_ASM1342607v1_bin_1	3365	3365	HyAsP	143042	0.928253449103817	0.022	3365	1	0.043	0	0	no	4	0	yes	no	NA	NA	NA	NA
GCA_013426075.1_ASM1342607v1	CP058653.1	154098	GCA_013426075.1_ASM1342607v1_bin_11	17404	17404	HyAsP	143042	0.928253449103817	0.113	17404	1	0.203	0	0	no	4	0	yes	no	NA	NA	NA	NA
GCA_013426075.1_ASM1342607v1	CP058653.1	154098	GCA_013426075.1_ASM1342607v1_bin_10	11219	11373	HyAsP	143042	0.928253449103817	0.073	11219	0.986	0.136	0	0	no	4	0	yes	no	NA	NA	NA	NA
GCA_013426075.1_ASM1342607v1	CP058653.1	154098	GCA_013426075.1_ASM1342607v1_bin_15	15673	15673	HyAsP	143042	0.928253449103817	0.102	15673	1	0.185	0	0	no	4	0	yes	no	NA	NA	NA	NA
GCA_013426075.1_ASM1342607v1	CP058653.1	154098	GCA_013426075.1_ASM1342607v1_bin_7	2888	3700	HyAsP	143042	0.928253449103817	0.019	2888	0.781	0.037	0	0	no	4	0	yes	no	NA	NA	NA	NA
GCA_013426075.1_ASM1342607v1	CP058654.1	89623	GCA_013426075.1_ASM1342607v1_bin_16	69027	69809	HyAsP	87772	0.979346819454827	0.77	69027	0.989	0.866	0	0	no	0	0	no	no	NA	NA	NA	NA
GCA_013426075.1_ASM1342607v1	CP058654.1	89623	GCA_013426075.1_ASM1342607v1_bin_18	18745	21225	HyAsP	87772	0.979346819454827	0.209	18745	0.883	0.338	0	0	no	0	0	no	no	NA	NA	NA	NA
GCA_013426075.1_ASM1342607v1	CP058655.1	2101	GCA_013426075.1_ASM1342607v1_bin_2	2101	2178	HyAsP	2101	1	1	2101	0.965	0.982	0	0	yes	0	0	no	no	NA	NA	NA	NA
GCA_013426075.1_ASM1342607v1	CP058652.1	34321	GCA_013426075.1_ASM1342607v1_bin_9	25114	25488	HyAsP	33021	0.96212231578334	0.732	25114	0.985	0.84	0	0	no	1	1	yes	yes	NA	NA	NA	NA
GCA_013426075.1_ASM1342607v1	CP058652.1	34321	GCA_013426075.1_ASM1342607v1_bin_3	5730	5828	HyAsP	33021	0.96212231578334	0.167	5730	0.983	0.285	0	0	no	1	1	yes	yes	1	1	1	1
GCA_013426075.1_ASM1342607v1	CP058652.1	34321	GCA_013426075.1_ASM1342607v1_bin_4	2289	2289	HyAsP	33021	0.96212231578334	0.067	2289	1	0.126	0	0	no	1	1	yes	yes	NA	NA	NA	NA
GCA_013426095.1_ASM1342609v1	CP058658.1	122305	GCA_013426095.1_ASM1342609v1_bin_2	5160	5980	HyAsP	113012	0.92401782429173	0.042	5160	0.863	0.08	0	0	no	3	0	yes	no	1	1	3	0.333333333333333
GCA_013426095.1_ASM1342609v1	CP058658.1	122305	GCA_013426095.1_ASM1342609v1_bin_15	1366	2219	HyAsP	113012	0.92401782429173	0.011	1366	0.616	0.022	0	0	no	3	0	yes	no	NA	NA	NA	NA
GCA_013426095.1_ASM1342609v1	CP058658.1	122305	GCA_013426095.1_ASM1342609v1_bin_6	35202	37399	HyAsP	113012	0.92401782429173	0.288	35202	0.941	0.441	0	0	no	3	0	yes	no	2	2	3	0.666666666666667
GCA_013426095.1_ASM1342609v1	CP058658.1	122305	GCA_013426095.1_ASM1342609v1_bin_8	11219	12021	HyAsP	113012	0.92401782429173	0.092	11219	0.933	0.167	0	0	no	3	0	yes	no	NA	NA	NA	NA
GCA_013426095.1_ASM1342609v1	CP058658.1	122305	GCA_013426095.1_ASM1342609v1_bin_9	2888	3460	HyAsP	113012	0.92401782429173	0.024	2888	0.835	0.047	0	0	no	3	0	yes	no	NA	NA	NA	NA
GCA_013426095.1_ASM1342609v1	CP058658.1	122305	GCA_013426095.1_ASM1342609v1_bin_10	25663	25663	HyAsP	113012	0.92401782429173	0.21	25663	1	0.347	0	0	no	3	0	yes	no	NA	NA	NA	NA
GCA_013426095.1_ASM1342609v1	CP058658.1	122305	GCA_013426095.1_ASM1342609v1_bin_11	19354	19354	HyAsP	113012	0.92401782429173	0.158	19354	1	0.273	0	0	no	3	0	yes	no	NA	NA	NA	NA
GCA_013426095.1_ASM1342609v1	CP058658.1	122305	GCA_013426095.1_ASM1342609v1_bin_12	12284	13500	HyAsP	113012	0.92401782429173	0.1	12284	0.91	0.18	1954	0.144740740740741	no	3	0	yes	no	NA	NA	NA	NA
GCA_013426095.1_ASM1342609v1	CP058659.1	89623	GCA_013426095.1_ASM1342609v1_bin_13	87894	207348	HyAsP	87894	0.980708077167691	0.981	87894	0.424	0.592	114541	0.552409475857013	no	0	0	no	no	NA	NA	NA	NA
GCA_013426095.1_ASM1342609v1	CP058660.1	2101	not_detected	0	not_applicable	HyAsP	2101	1	NA	0	NA	NA	not_applicable	not_applicable	no	0	0	no	no	NA	NA	NA	NA
GCA_013426095.1_ASM1342609v1	CP058657.1	34321	GCA_013426095.1_ASM1342609v1_bin_3	2289	2289	HyAsP	33021	0.96212231578334	0.067	2289	1	0.126	0	0	no	1	1	yes	yes	NA	NA	NA	NA
GCA_013426095.1_ASM1342609v1	CP058657.1	34321	GCA_013426095.1_ASM1342609v1_bin_1	5730	5828	HyAsP	33021	0.96212231578334	0.167	5730	0.983	0.285	0	0	no	1	1	yes	yes	1	1	1	1
GCA_013426095.1_ASM1342609v1	CP058657.1	34321	GCA_013426095.1_ASM1342609v1_bin_4	25114	25334	HyAsP	33021	0.96212231578334	0.732	25114	0.991	0.842	0	0	no	1	1	yes	yes	NA	NA	NA	NA
GCA_013592195.1_ASM1359219v1	CP055625.1	119408	GCA_013592195.1_ASM1359219v1_bin_1	1150	1905	HyAsP	85976	0.720018759212113	0.01	1150	0.604	0.02	0	0	no	1	0	yes	no	NA	NA	NA	NA
GCA_013592195.1_ASM1359219v1	CP055625.1	119408	GCA_013592195.1_ASM1359219v1_bin_15	3576	10625	HyAsP	85976	0.720018759212113	0.03	3576	0.337	0.055	0	0	no	1	0	yes	no	NA	NA	NA	NA
GCA_013592195.1_ASM1359219v1	CP055625.1	119408	GCA_013592195.1_ASM1359219v1_bin_8	8172	9127	HyAsP	85976	0.720018759212113	0.068	8172	0.895	0.126	0	0	no	1	0	yes	no	NA	NA	NA	NA
GCA_013592195.1_ASM1359219v1	CP055625.1	119408	GCA_013592195.1_ASM1359219v1_bin_10	12990	15151	HyAsP	85976	0.720018759212113	0.109	12990	0.857	0.193	0	0	no	1	0	yes	no	NA	NA	NA	NA
GCA_013592195.1_ASM1359219v1	CP055625.1	119408	GCA_013592195.1_ASM1359219v1_bin_16	3586	7704	HyAsP	85976	0.720018759212113	0.03	3586	0.465	0.056	0	0	no	1	0	yes	no	NA	NA	NA	NA
GCA_013592195.1_ASM1359219v1	CP055625.1	119408	GCA_013592195.1_ASM1359219v1_bin_17	11186	6993	HyAsP	85976	0.720018759212113	0.094	6302	0.901	0.17	0	0	no	1	0	yes	no	NA	NA	NA	NA
GCA_013592195.1_ASM1359219v1	CP055625.1	119408	GCA_013592195.1_ASM1359219v1_bin_7	23992	24782	HyAsP	85976	0.720018759212113	0.201	17319	0.699	0.312	0	0	no	1	0	yes	no	1	1	1	1
GCA_013592195.1_ASM1359219v1	CP055626.1	94171	GCA_013592195.1_ASM1359219v1_bin_18	40302	59007	HyAsP	88898	0.944006116532691	0.428	40302	0.683	0.526	10408	0.176385852525971	no	0	0	no	no	NA	NA	NA	NA
GCA_013592195.1_ASM1359219v1	CP055626.1	94171	GCA_013592195.1_ASM1359219v1_bin_13	14707	14707	HyAsP	88898	0.944006116532691	0.156	14707	1	0.27	0	0	no	0	0	no	no	NA	NA	NA	NA
GCA_013592195.1_ASM1359219v1	CP055627.1	92689	GCA_013592195.1_ASM1359219v1_bin_1	3450	1905	HyAsP	68793	0.742191630074766	0.037	1150	0.604	0.07	0	0	no	0	0	no	no	NA	NA	NA	NA
GCA_013592195.1_ASM1359219v1	CP055627.1	92689	GCA_013592195.1_ASM1359219v1_bin_3	3226	3380	HyAsP	68793	0.742191630074766	0.035	3226	0.954	0.068	0	0	no	0	0	no	no	NA	NA	NA	NA
GCA_013592195.1_ASM1359219v1	CP055627.1	92689	GCA_013592195.1_ASM1359219v1_bin_15	2356	10625	HyAsP	68793	0.742191630074766	0.025	2356	0.222	0.045	0	0	no	0	0	no	no	NA	NA	NA	NA
GCA_013592195.1_ASM1359219v1	CP055627.1	92689	GCA_013592195.1_ASM1359219v1_bin_2	1209	1209	HyAsP	68793	0.742191630074766	0.013	1209	1	0.026	0	0	no	0	0	no	no	NA	NA	NA	NA
GCA_013592195.1_ASM1359219v1	CP055627.1	92689	GCA_013592195.1_ASM1359219v1_bin_19	1080	1080	HyAsP	68793	0.742191630074766	0.012	1080	1	0.024	0	0	no	0	0	no	no	NA	NA	NA	NA
GCA_013592195.1_ASM1359219v1	CP055627.1	92689	GCA_013592195.1_ASM1359219v1_bin_11	21013	23715	HyAsP	68793	0.742191630074766	0.227	21013	0.886	0.361	0	0	no	0	0	no	no	NA	NA	NA	NA
GCA_013592195.1_ASM1359219v1	CP055628.1	46125	GCA_013592195.1_ASM1359219v1_bin_4	39412	41014	HyAsP	44079	0.955642276422764	0.854	39412	0.961	0.904	0	0	no	0	0	no	no	NA	NA	NA	NA
GCA_013592195.1_ASM1359219v1	CP055628.1	46125	GCA_013592195.1_ASM1359219v1_bin_9	4771	4771	HyAsP	44079	0.955642276422764	0.103	4771	1	0.187	0	0	no	0	0	no	no	NA	NA	NA	NA
GCA_013592195.1_ASM1359219v1	CP055629.1	3125	not_detected	0	not_applicable	HyAsP	3125	1	NA	0	NA	NA	not_applicable	not_applicable	no	0	0	no	no	NA	NA	NA	NA
GCA_013592195.1_ASM1359219v1	CP055630.1	1348	not_detected	0	not_applicable	HyAsP	1048	0.777448071216617	NA	0	NA	NA	not_applicable	not_applicable	no	0	0	no	no	NA	NA	NA	NA
GCA_013601135.1_ASM1360113v1	CP055714.1	72254	GCA_013601135.1_ASM1360113v1_bin_5	60314	63569	HyAsP	68988	0.954798350264345	0.835	60314	0.949	0.888	0	0	no	0	0	no	no	NA	NA	NA	NA
GCA_013601135.1_ASM1360113v1	CP055715.1	37616	GCA_013601135.1_ASM1360113v1_bin_2	37616	37693	HyAsP	37616	1	1	37616	0.998	0.999	0	0	yes	0	0	no	no	NA	NA	NA	NA
GCA_013601135.1_ASM1360113v1	CP055716.1	6809	GCA_013601135.1_ASM1360113v1_bin_1	6809	6886	HyAsP	6809	1	1	6809	0.989	0.994	0	0	yes	0	0	no	no	NA	NA	NA	NA
GCA_013601135.1_ASM1360113v1	CP055717.1	1611	not_detected	0	not_applicable	HyAsP	0	0	NA	0	NA	NA	not_applicable	not_applicable	no	0	0	no	no	NA	NA	NA	NA
GCA_013602835.1_ASM1360283v1	CP055734.1	2848	not_detected	0	not_applicable	HyAsP	0	0	NA	0	NA	NA	not_applicable	not_applicable	no	0	0	no	no	NA	NA	NA	NA
GCA_013602835.1_ASM1360283v1	CP055735.1	2275	not_detected	0	not_applicable	HyAsP	1819	0.79956043956044	NA	0	NA	NA	not_applicable	not_applicable	no	0	0	no	no	NA	NA	NA	NA
GCA_013602835.1_ASM1360283v1	CP055725.1	92722	GCA_013602835.1_ASM1360283v1_bin_3	19293	26757	HyAsP	79230	0.85448976510429	0.208	19293	0.721	0.323	0	0	no	0	0	no	no	NA	NA	NA	NA
GCA_013602835.1_ASM1360283v1	CP055725.1	92722	GCA_013602835.1_ASM1360283v1_bin_5	31040	69114	HyAsP	79230	0.85448976510429	0.335	28341	0.41	0.369	9672	0.139942703359667	no	0	0	no	no	NA	NA	NA	NA
GCA_013602835.1_ASM1360283v1	CP055725.1	92722	GCA_013602835.1_ASM1360283v1_bin_2	23682	31295	HyAsP	79230	0.85448976510429	0.255	23682	0.757	0.381	1732	0.0553443042019492	no	0	0	no	no	NA	NA	NA	NA
GCA_013602835.1_ASM1360283v1	CP055726.1	55974	GCA_013602835.1_ASM1360283v1_bin_3	6662	26757	HyAsP	44037	0.786740272269268	0.119	6662	0.249	0.161	0	0	no	0	0	no	no	NA	NA	NA	NA
GCA_013602835.1_ASM1360283v1	CP055726.1	55974	GCA_013602835.1_ASM1360283v1_bin_5	27359	69114	HyAsP	44037	0.786740272269268	0.489	27359	0.396	0.438	9672	0.139942703359667	no	0	0	no	no	NA	NA	NA	NA
GCA_013602835.1_ASM1360283v1	CP055726.1	55974	GCA_013602835.1_ASM1360283v1_bin_8	6755	8676	HyAsP	44037	0.786740272269268	0.121	6755	0.779	0.209	0	0	no	0	0	no	no	NA	NA	NA	NA
GCA_013602835.1_ASM1360283v1	CP055727.1	6988	GCA_013602835.1_ASM1360283v1_bin_1	6832	7142	HyAsP	6832	0.977676016027476	0.978	6832	0.957	0.967	0	0	yes	0	0	no	no	NA	NA	NA	NA
GCA_013602835.1_ASM1360283v1	CP055728.1	6746	not_detected	0	not_applicable	HyAsP	6065	0.899051289653128	NA	0	NA	NA	not_applicable	not_applicable	no	0	0	no	no	NA	NA	NA	NA
GCA_013602835.1_ASM1360283v1	CP055729.1	4973	not_detected	0	not_applicable	HyAsP	4912	0.987733762316509	NA	0	NA	NA	not_applicable	not_applicable	no	0	0	no	no	NA	NA	NA	NA
GCA_013602835.1_ASM1360283v1	CP055730.1	4286	not_detected	0	not_applicable	HyAsP	4129	0.963369108726085	NA	0	NA	NA	not_applicable	not_applicable	no	0	0	no	no	NA	NA	NA	NA
GCA_013602835.1_ASM1360283v1	CP055731.1	3605	not_detected	0	not_applicable	HyAsP	3605	1	NA	0	NA	NA	not_applicable	not_applicable	no	0	0	no	no	NA	NA	NA	NA
GCA_013602835.1_ASM1360283v1	CP055732.1	3142	not_detected	0	not_applicable	HyAsP	3087	0.982495225970719	NA	0	NA	NA	not_applicable	not_applicable	no	0	0	no	no	NA	NA	NA	NA
GCA_013602835.1_ASM1360283v1	CP055733.1	3136	not_detected	0	not_applicable	HyAsP	3125	0.996492346938776	NA	0	NA	NA	not_applicable	not_applicable	no	0	0	no	no	NA	NA	NA	NA
GCA_013725775.1_ASM1372577v1	CP056243.1	108567	GCA_013725775.1_ASM1372577v1_bin_1	1258	1258	HyAsP	106902	0.984663848130647	0.012	1258	1	0.024	1258	1	no	0	0	no	no	NA	NA	NA	NA
GCA_013725775.1_ASM1372577v1	CP056243.1	108567	GCA_013725775.1_ASM1372577v1_bin_3	67234	68671	HyAsP	106902	0.984663848130647	0.619	67234	0.979	0.758	0	0	no	0	0	no	no	NA	NA	NA	NA
GCA_013725775.1_ASM1372577v1	CP056243.1	108567	GCA_013725775.1_ASM1372577v1_bin_2	38560	38979	HyAsP	106902	0.984663848130647	0.355	38560	0.989	0.522	0	0	no	0	0	no	no	NA	NA	NA	NA
GCA_013727075.1_ASM1372707v1	CP056250.1	112626	GCA_013727075.1_ASM1372707v1_bin_2	1331	1331	HyAsP	110030	0.976950260153073	0.012	1331	1	0.024	1331	1	no	0	0	no	no	NA	NA	NA	NA
GCA_013727075.1_ASM1372707v1	CP056250.1	112626	GCA_013727075.1_ASM1372707v1_bin_5	92652	93802	HyAsP	110030	0.976950260153073	0.823	92652	0.988	0.898	0	0	no	0	0	no	no	NA	NA	NA	NA
GCA_013727815.1_ASM1372781v1	CP056264.1	77336	GCA_013727815.1_ASM1372781v1_bin_5	50115	75597	HyAsP	70474	0.911270301024103	0.648	50115	0.663	0.655	2805	0.037104647009802	no	2	1	yes	yes	NA	NA	NA	NA
GCA_013727815.1_ASM1372781v1	CP056264.1	77336	GCA_013727815.1_ASM1372781v1_bin_3	2417	2417	HyAsP	70474	0.911270301024103	0.031	2417	1	0.06	0	0	no	2	1	yes	yes	NA	NA	NA	NA
GCA_013727815.1_ASM1372781v1	CP056264.1	77336	GCA_013727815.1_ASM1372781v1_bin_2	17942	22919	HyAsP	70474	0.911270301024103	0.232	17942	0.783	0.358	0	0	no	2	1	yes	yes	2	2	2	1
GCA_013727815.1_ASM1372781v1	CP056265.1	57094	GCA_013727815.1_ASM1372781v1_bin_5	10185	75597	HyAsP	43317	0.758696185238379	0.178	10185	0.135	0.154	2805	0.037104647009802	no	0	0	no	no	NA	NA	NA	NA
GCA_013727815.1_ASM1372781v1	CP056265.1	57094	GCA_013727815.1_ASM1372781v1_bin_2	2852	22919	HyAsP	43317	0.758696185238379	0.05	2852	0.124	0.071	0	0	no	0	0	no	no	NA	NA	NA	NA
GCA_013727815.1_ASM1372781v1	CP056265.1	57094	GCA_013727815.1_ASM1372781v1_bin_4	1175	205952	HyAsP	43317	0.758696185238379	0.021	1175	0.006	0.009	195494	0.949221177750155	no	0	0	no	no	NA	NA	NA	NA
GCA_013727815.1_ASM1372781v1	CP056266.1	7939	GCA_013727815.1_ASM1372781v1_bin_1	7939	8016	HyAsP	7939	1	1	7939	0.99	0.995	0	0	yes	0	0	no	no	NA	NA	NA	NA
GCA_013728735.1_ASM1372873v1	CP056274.1	139002	GCA_013728735.1_ASM1372873v1_bin_14	2699	4557	HyAsP	122864	0.883900951065452	0.019	2699	0.592	0.037	3855	0.845951283739302	no	0	0	no	no	NA	NA	NA	NA
GCA_013728735.1_ASM1372873v1	CP056274.1	139002	GCA_013728735.1_ASM1372873v1_bin_8	49316	49524	HyAsP	122864	0.883900951065452	0.355	49316	0.996	0.523	0	0	no	0	0	no	no	NA	NA	NA	NA
GCA_013728735.1_ASM1372873v1	CP056274.1	139002	GCA_013728735.1_ASM1372873v1_bin_11	5184	10218	HyAsP	122864	0.883900951065452	0.037	5184	0.507	0.069	3588	0.351145038167939	no	0	0	no	no	NA	NA	NA	NA
GCA_013728735.1_ASM1372873v1	CP056274.1	139002	GCA_013728735.1_ASM1372873v1_bin_7	10223	10529	HyAsP	122864	0.883900951065452	0.074	10223	0.971	0.138	0	0	no	0	0	no	no	NA	NA	NA	NA
GCA_013728735.1_ASM1372873v1	CP056274.1	139002	GCA_013728735.1_ASM1372873v1_bin_4	22123	23928	HyAsP	122864	0.883900951065452	0.159	22123	0.925	0.271	0	0	no	0	0	no	no	NA	NA	NA	NA
GCA_013728735.1_ASM1372873v1	CP056274.1	139002	GCA_013728735.1_ASM1372873v1_bin_10	2699	5025	HyAsP	122864	0.883900951065452	0.019	2699	0.537	0.037	4645	0.924378109452736	no	0	0	no	no	NA	NA	NA	NA
GCA_013728735.1_ASM1372873v1	CP056274.1	139002	GCA_013728735.1_ASM1372873v1_bin_9	16118	16118	HyAsP	122864	0.883900951065452	0.116	16118	1	0.208	0	0	no	0	0	no	no	NA	NA	NA	NA
GCA_013728735.1_ASM1372873v1	CP056274.1	139002	GCA_013728735.1_ASM1372873v1_bin_12	2699	66732	HyAsP	122864	0.883900951065452	0.019	2699	0.04	0.026	65076	0.97518431936702	no	0	0	no	no	NA	NA	NA	NA
GCA_013728735.1_ASM1372873v1	CP056274.1	139002	GCA_013728735.1_ASM1372873v1_bin_5	4881	4881	HyAsP	122864	0.883900951065452	0.035	4881	1	0.068	0	0	no	0	0	no	no	NA	NA	NA	NA
GCA_013728735.1_ASM1372873v1	CP056274.1	139002	GCA_013728735.1_ASM1372873v1_bin_19	7817	10580	HyAsP	122864	0.883900951065452	0.056	4315	0.408	0.098	6077	0.574385633270321	no	0	0	no	no	NA	NA	NA	NA
GCA_013728735.1_ASM1372873v1	CP056274.1	139002	GCA_013728735.1_ASM1372873v1_bin_3	1865	2074	HyAsP	122864	0.883900951065452	0.013	1865	0.899	0.026	0	0	no	0	0	no	no	NA	NA	NA	NA
GCA_013728735.1_ASM1372873v1	CP056274.1	139002	GCA_013728735.1_ASM1372873v1_bin_2	5253	2462	HyAsP	122864	0.883900951065452	0.038	1751	0.711	0.072	1751	0.711210398050366	no	0	0	no	no	NA	NA	NA	NA
GCA_013729295.1_ASM1372929v1	CP056279.1	59864	GCA_013729295.1_ASM1372929v1_bin_2	10430	10773	HyAsP	54676	0.913336896966457	0.174	10430	0.968	0.295	0	0	no	0	0	no	no	NA	NA	NA	NA
GCA_013729295.1_ASM1372929v1	CP056279.1	59864	GCA_013729295.1_ASM1372929v1_bin_7	26855	47767	HyAsP	54676	0.913336896966457	0.449	26855	0.562	0.499	0	0	no	0	0	no	no	NA	NA	NA	NA
GCA_013729295.1_ASM1372929v1	CP056280.1	52530	GCA_013729295.1_ASM1372929v1_bin_7	19283	47767	HyAsP	46651	0.888083000190367	0.367	19283	0.404	0.385	0	0	no	0	0	no	no	NA	NA	NA	NA
GCA_013729295.1_ASM1372929v1	CP056280.1	52530	GCA_013729295.1_ASM1372929v1_bin_9	21887	27290	HyAsP	46651	0.888083000190367	0.417	21887	0.802	0.549	0	0	no	0	0	no	no	NA	NA	NA	NA
GCA_013729295.1_ASM1372929v1	CP056281.1	4074	GCA_013729295.1_ASM1372929v1_bin_1	4074	4151	HyAsP	4074	1	1	4074	0.981	0.99	0	0	yes	0	0	no	no	NA	NA	NA	NA
GCA_013729535.1_ASM1372953v1	CP056283.1	97488	GCA_013729535.1_ASM1372953v1_bin_5	2965	3781	HyAsP	93470	0.958784670933859	0.03	2965	0.784	0.058	0	0	no	0	0	no	no	NA	NA	NA	NA
GCA_013729535.1_ASM1372953v1	CP056283.1	97488	GCA_013729535.1_ASM1372953v1_bin_1	3988	1994	HyAsP	93470	0.958784670933859	0.041	1994	1	0.079	1994	1	no	0	0	no	no	NA	NA	NA	NA
GCA_013729535.1_ASM1372953v1	CP056283.1	97488	GCA_013729535.1_ASM1372953v1_bin_3	4925	5119	HyAsP	93470	0.958784670933859	0.051	4925	0.962	0.097	0	0	no	0	0	no	no	NA	NA	NA	NA
GCA_013729535.1_ASM1372953v1	CP056283.1	97488	GCA_013729535.1_ASM1372953v1_bin_9	37294	39051	HyAsP	93470	0.958784670933859	0.383	37294	0.955	0.547	0	0	no	0	0	no	no	NA	NA	NA	NA
GCA_013729535.1_ASM1372953v1	CP056283.1	97488	GCA_013729535.1_ASM1372953v1_bin_7	30552	30552	HyAsP	93470	0.958784670933859	0.313	30552	1	0.477	0	0	no	0	0	no	no	NA	NA	NA	NA
GCA_013729535.1_ASM1372953v1	CP056283.1	97488	GCA_013729535.1_ASM1372953v1_bin_4	5808	5960	HyAsP	93470	0.958784670933859	0.06	5808	0.974	0.113	0	0	no	0	0	no	no	NA	NA	NA	NA
GCA_013730915.1_ASM1373091v1	CP056300.1	110291	GCA_013730915.1_ASM1373091v1_bin_2	52272	52272	HyAsP	110291	1	0.474	52272	1	0.643	0	0	no	0	0	no	no	NA	NA	NA	NA
GCA_013730915.1_ASM1373091v1	CP056300.1	110291	GCA_013730915.1_ASM1373091v1_bin_3	58135	58289	HyAsP	110291	1	0.527	58135	0.997	0.69	0	0	no	0	0	no	no	NA	NA	NA	NA
GCA_013731515.1_ASM1373151v1	CP056305.1	131482	GCA_013731515.1_ASM1373151v1_bin_6	1778	2686	HyAsP	114167	0.868308970049132	0.014	1778	0.662	0.027	1778	0.661950856291884	no	5	0	yes	no	NA	NA	NA	NA
GCA_013731515.1_ASM1373151v1	CP056305.1	131482	GCA_013731515.1_ASM1373151v1_bin_7	12163	13434	HyAsP	114167	0.868308970049132	0.093	12163	0.905	0.169	1171	0.0871668899806461	no	5	0	yes	no	NA	NA	NA	NA
GCA_013731515.1_ASM1373151v1	CP056305.1	131482	GCA_013731515.1_ASM1373151v1_bin_4	10260	12484	HyAsP	114167	0.868308970049132	0.078	10260	0.822	0.142	0	0	no	5	0	yes	no	5	5	5	1
GCA_013731515.1_ASM1373151v1	CP056305.1	131482	GCA_013731515.1_ASM1373151v1_bin_2	16004	20071	HyAsP	114167	0.868308970049132	0.122	16004	0.797	0.212	0	0	no	5	0	yes	no	NA	NA	NA	NA
GCA_013731515.1_ASM1373151v1	CP056305.1	131482	GCA_013731515.1_ASM1373151v1_bin_3	44625	95091	HyAsP	114167	0.868308970049132	0.339	44625	0.469	0.394	45772	0.481349444216593	no	5	0	yes	no	NA	NA	NA	NA
GCA_013731515.1_ASM1373151v1	CP056306.1	4074	GCA_013731515.1_ASM1373151v1_bin_1	4074	4151	HyAsP	4074	1	1	4074	0.981	0.99	0	0	yes	0	0	no	no	NA	NA	NA	NA
GCA_013732175.1_ASM1373217v1	CP056316.1	88905	GCA_013732175.1_ASM1373217v1_bin_2	35255	40488	HyAsP	81336	0.914864180867218	0.397	35255	0.871	0.545	1443	0.0356401896858328	no	6	0	yes	no	5	5	6	0.833333333333333
GCA_013732175.1_ASM1373217v1	CP056316.1	88905	GCA_013732175.1_ASM1373217v1_bin_7	6519	55245	HyAsP	81336	0.914864180867218	0.073	6519	0.118	0.09	45863	0.830174676441307	no	6	0	yes	no	NA	NA	NA	NA
GCA_013732175.1_ASM1373217v1	CP056316.1	88905	GCA_013732175.1_ASM1373217v1_bin_3	34702	38615	HyAsP	81336	0.914864180867218	0.39	34702	0.899	0.544	2422	0.0627217402563771	no	6	0	yes	no	1	1	6	0.166666666666667
GCA_013732175.1_ASM1373217v1	CP056316.1	88905	GCA_013732175.1_ASM1373217v1_bin_6	2532	7873	HyAsP	81336	0.914864180867218	0.028	2532	0.322	0.052	6854	0.87057030356916	no	6	0	yes	no	NA	NA	NA	NA
GCA_013732175.1_ASM1373217v1	CP056316.1	88905	GCA_013732175.1_ASM1373217v1_bin_8	2431	53706	HyAsP	81336	0.914864180867218	0.027	2431	0.045	0.034	0	0	no	6	0	yes	no	1	8	6	0.166666666666667
GCA_013732175.1_ASM1373217v1	CP056317.1	55918	GCA_013732175.1_ASM1373217v1_bin_2	2431	40488	HyAsP	50072	0.895454057727387	0.043	2431	0.06	0.05	1443	0.0356401896858328	no	8	0	yes	no	1	5	8	0.125
GCA_013732175.1_ASM1373217v1	CP056317.1	55918	GCA_013732175.1_ASM1373217v1_bin_8	49841	53706	HyAsP	50072	0.895454057727387	0.891	48598	0.905	0.898	0	0	no	8	0	yes	no	7	8	8	0.875
GCA_013732175.1_ASM1373217v1	CP056318.1	5716	not_detected	0	not_applicable	HyAsP	5716	1	NA	0	NA	NA	not_applicable	not_applicable	no	0	0	no	no	NA	NA	NA	NA
GCA_013732175.1_ASM1373217v1	CP056319.1	5444	GCA_013732175.1_ASM1373217v1_bin_1	5444	5521	HyAsP	5444	1	1	5444	0.986	0.993	0	0	yes	0	0	no	no	NA	NA	NA	NA
GCA_013732175.1_ASM1373217v1	CP056320.1	4084	GCA_013732175.1_ASM1373217v1_bin_5	4084	4161	HyAsP	4084	1	1	4084	0.981	0.99	0	0	yes	0	0	no	no	NA	NA	NA	NA
GCA_013735655.1_ASM1373565v1	CP056413.1	187726	GCA_013735655.1_ASM1373565v1_bin_13	47111	108528	HyAsP	155531	0.828500047942214	0.251	47111	0.434	0.318	54590	0.503003833112192	no	0	0	no	no	NA	NA	NA	NA
GCA_013735655.1_ASM1373565v1	CP056413.1	187726	GCA_013735655.1_ASM1373565v1_bin_7	8673	12339	HyAsP	155531	0.828500047942214	0.046	8673	0.703	0.086	2365	0.191668692762785	no	0	0	no	no	NA	NA	NA	NA
GCA_013735655.1_ASM1373565v1	CP056413.1	187726	GCA_013735655.1_ASM1373565v1_bin_21	4484	38626	HyAsP	155531	0.828500047942214	0.024	4484	0.116	0.04	31229	0.808496867395019	no	0	0	no	no	NA	NA	NA	NA
GCA_013735655.1_ASM1373565v1	CP056413.1	187726	GCA_013735655.1_ASM1373565v1_bin_19	47843	101982	HyAsP	155531	0.828500047942214	0.255	47843	0.469	0.33	48322	0.473828714871252	no	0	0	no	no	NA	NA	NA	NA
GCA_013735655.1_ASM1373565v1	CP056413.1	187726	GCA_013735655.1_ASM1373565v1_bin_9	2699	3074	HyAsP	155531	0.828500047942214	0.014	2699	0.878	0.028	2699	0.878009108653221	no	0	0	no	no	NA	NA	NA	NA
GCA_013735655.1_ASM1373565v1	CP056413.1	187726	GCA_013735655.1_ASM1373565v1_bin_10	12727	37042	HyAsP	155531	0.828500047942214	0.068	12727	0.344	0.114	24315	0.656417040116624	no	0	0	no	no	NA	NA	NA	NA
GCA_013735655.1_ASM1373565v1	CP056413.1	187726	GCA_013735655.1_ASM1373565v1_bin_5	1014	1298	HyAsP	155531	0.828500047942214	0.005	1014	0.781	0.01	1014	0.781201848998459	no	0	0	no	no	NA	NA	NA	NA
GCA_013735655.1_ASM1373565v1	CP056413.1	187726	GCA_013735655.1_ASM1373565v1_bin_1	5552	1388	HyAsP	155531	0.828500047942214	0.03	1388	1	0.058	1388	1	no	0	0	no	no	NA	NA	NA	NA
GCA_013735655.1_ASM1373565v1	CP056413.1	187726	GCA_013735655.1_ASM1373565v1_bin_12	2535	3858	HyAsP	155531	0.828500047942214	0.014	2535	0.657	0.027	0	0	no	0	0	no	no	NA	NA	NA	NA
GCA_013735655.1_ASM1373565v1	CP056413.1	187726	GCA_013735655.1_ASM1373565v1_bin_23	5864	33383	HyAsP	155531	0.828500047942214	0.031	5864	0.176	0.053	29780	0.892070814486415	no	0	0	no	no	NA	NA	NA	NA
GCA_013735655.1_ASM1373565v1	CP056414.1	13243	not_detected	0	not_applicable	HyAsP	13243	1	NA	0	NA	NA	not_applicable	not_applicable	no	0	0	no	no	NA	NA	NA	NA
GCA_013735655.1_ASM1373565v1	CP056415.1	4566	GCA_013735655.1_ASM1373565v1_bin_2	1230	1380	HyAsP	4535	0.993210687691634	0.269	1230	0.891	0.413	1230	0.891304347826087	no	0	0	no	no	NA	NA	NA	NA
GCA_013735655.1_ASM1373565v1	CP056416.1	4161	not_detected	0	not_applicable	HyAsP	4161	1	NA	0	NA	NA	not_applicable	not_applicable	no	0	0	no	no	NA	NA	NA	NA
GCA_013735655.1_ASM1373565v1	CP056417.1	2353	not_detected	0	not_applicable	HyAsP	2353	1	NA	0	NA	NA	not_applicable	not_applicable	no	0	0	no	no	NA	NA	NA	NA
GCA_013739975.1_ASM1373997v1	CP056405.1	68855	GCA_013739975.1_ASM1373997v1_bin_3	7968	69280	HyAsP	67677	0.98289158376298	0.116	7968	0.115	0.115	59234	0.854994226327945	no	0	0	no	no	NA	NA	NA	NA
GCA_013739975.1_ASM1373997v1	CP056405.1	68855	GCA_013739975.1_ASM1373997v1_bin_6	59709	121251	HyAsP	67677	0.98289158376298	0.867	59709	0.492	0.628	61308	0.505628819556127	no	0	0	no	no	NA	NA	NA	NA
GCA_013739975.1_ASM1373997v1	CP056406.1	7461	GCA_013739975.1_ASM1373997v1_bin_1	7461	7538	HyAsP	7461	1	1	7461	0.99	0.995	0	0	yes	0	0	no	no	NA	NA	NA	NA
GCA_013739975.1_ASM1373997v1	CP056407.1	2524	not_detected	0	not_applicable	HyAsP	2524	1	NA	0	NA	NA	not_applicable	not_applicable	no	0	0	no	no	NA	NA	NA	NA
GCA_013739975.1_ASM1373997v1	CP056408.1	2089	not_detected	0	not_applicable	HyAsP	0	0	NA	0	NA	NA	not_applicable	not_applicable	no	0	0	no	no	NA	NA	NA	NA
GCA_013740395.1_ASM1374039v1	CP056447.1	93941	GCA_013740395.1_ASM1374039v1_bin_9	90893	101850	HyAsP	90893	0.967554103107269	0.968	90893	0.892	0.928	3170	0.0311242022582229	no	1	1	yes	yes	1	1	1	1
GCA_013740395.1_ASM1374039v1	CP056448.1	57093	GCA_013740395.1_ASM1374039v1_bin_10	6772	11091	HyAsP	46261	0.81027446447025	0.119	5672	0.511	0.193	3863	0.348300423767018	no	0	0	no	no	NA	NA	NA	NA
GCA_013740395.1_ASM1374039v1	CP056448.1	57093	GCA_013740395.1_ASM1374039v1_bin_9	7545	101850	HyAsP	46261	0.81027446447025	0.132	7545	0.074	0.095	3170	0.0311242022582229	no	0	0	no	no	NA	NA	NA	NA
GCA_013740395.1_ASM1374039v1	CP056448.1	57093	GCA_013740395.1_ASM1374039v1_bin_5	1443	95185	HyAsP	46261	0.81027446447025	0.025	1443	0.015	0.019	92709	0.973987498030152	no	0	0	no	no	NA	NA	NA	NA
GCA_013740395.1_ASM1374039v1	CP056448.1	57093	GCA_013740395.1_ASM1374039v1_bin_8	1727	2950	HyAsP	46261	0.81027446447025	0.03	1727	0.585	0.057	1727	0.585423728813559	no	0	0	no	no	NA	NA	NA	NA
GCA_013740395.1_ASM1374039v1	CP056448.1	57093	GCA_013740395.1_ASM1374039v1_bin_7	11410	13573	HyAsP	46261	0.81027446447025	0.2	10310	0.76	0.317	1342	0.0988727621012304	no	0	0	no	no	NA	NA	NA	NA
GCA_013740395.1_ASM1374039v1	CP056448.1	57093	GCA_013740395.1_ASM1374039v1_bin_4	2843	4667	HyAsP	46261	0.81027446447025	0.05	2843	0.609	0.092	1348	0.288836511677737	no	0	0	no	no	NA	NA	NA	NA
GCA_013740395.1_ASM1374039v1	CP056449.1	6200	GCA_013740395.1_ASM1374039v1_bin_2	5957	6277	HyAsP	5957	0.960806451612903	0.961	5957	0.949	0.955	0	0	yes	3	0	yes	no	3	3	3	1
GCA_013740395.1_ASM1374039v1	CP056450.1	4197	GCA_013740395.1_ASM1374039v1_bin_1	3865	4274	HyAsP	3865	0.920895878008101	0.921	3865	0.904	0.912	0	0	no	0	0	no	no	NA	NA	NA	NA
GCA_013741635.1_ASM1374163v1	CP056599.1	124230	GCA_013741635.1_ASM1374163v1_bin_3	11214	18470	HyAsP	104064	0.837672059888916	0.09	11214	0.607	0.157	0	0	no	3	0	yes	no	NA	NA	NA	NA
GCA_013741635.1_ASM1374163v1	CP056599.1	124230	GCA_013741635.1_ASM1374163v1_bin_9	3143	4669	HyAsP	104064	0.837672059888916	0.025	3143	0.673	0.048	0	0	no	3	0	yes	no	NA	NA	NA	NA
GCA_013741635.1_ASM1374163v1	CP056599.1	124230	GCA_013741635.1_ASM1374163v1_bin_6	65769	176570	HyAsP	104064	0.837672059888916	0.529	65769	0.372	0.437	91868	0.520292235374073	no	3	0	yes	no	1	1	3	0.333333333333333
GCA_013741635.1_ASM1374163v1	CP056599.1	124230	GCA_013741635.1_ASM1374163v1_bin_8	7787	115951	HyAsP	104064	0.837672059888916	0.063	7787	0.067	0.065	97122	0.837612439737475	no	3	0	yes	no	NA	NA	NA	NA
GCA_013741635.1_ASM1374163v1	CP056599.1	124230	GCA_013741635.1_ASM1374163v1_bin_5	16209	91789	HyAsP	104064	0.837672059888916	0.13	16209	0.177	0.15	0	0	no	3	0	yes	no	1	3	3	0.333333333333333
GCA_013741635.1_ASM1374163v1	CP056600.1	93526	GCA_013741635.1_ASM1374163v1_bin_3	2509	18470	HyAsP	85672	0.916023351795223	0.027	2509	0.136	0.045	0	0	no	3	0	yes	no	NA	NA	NA	NA
GCA_013741635.1_ASM1374163v1	CP056600.1	93526	GCA_013741635.1_ASM1374163v1_bin_6	13498	176570	HyAsP	85672	0.916023351795223	0.144	13498	0.076	0.099	91868	0.520292235374073	no	3	0	yes	no	NA	NA	NA	NA
GCA_013741635.1_ASM1374163v1	CP056600.1	93526	GCA_013741635.1_ASM1374163v1_bin_8	1764	115951	HyAsP	85672	0.916023351795223	0.019	1764	0.015	0.017	97122	0.837612439737475	no	3	0	yes	no	1	2	3	0.333333333333333
GCA_013741635.1_ASM1374163v1	CP056600.1	93526	GCA_013741635.1_ASM1374163v1_bin_5	67944	91789	HyAsP	85672	0.916023351795223	0.726	67944	0.74	0.733	0	0	no	3	0	yes	no	1	3	3	0.333333333333333
GCA_013741635.1_ASM1374163v1	CP056601.1	7939	GCA_013741635.1_ASM1374163v1_bin_1	7939	8016	HyAsP	7939	1	1	7939	0.99	0.995	0	0	yes	0	0	no	no	NA	NA	NA	NA
GCA_013741635.1_ASM1374163v1	CP056602.1	4072	GCA_013741635.1_ASM1374163v1_bin_2	4072	4149	HyAsP	4072	1	1	4072	0.981	0.99	0	0	yes	0	0	no	no	NA	NA	NA	NA
GCA_013741635.1_ASM1374163v1	CP056603.1	1552	not_detected	0	not_applicable	HyAsP	0	0	NA	0	NA	NA	not_applicable	not_applicable	no	0	0	no	no	NA	NA	NA	NA
GCA_013741855.1_ASM1374185v1	CP056609.1	146435	GCA_013741855.1_ASM1374185v1_bin_10	2146	4564	HyAsP	104435	0.713183323658961	0.015	2146	0.47	0.029	0	0	no	0	0	no	no	NA	NA	NA	NA
GCA_013741855.1_ASM1374185v1	CP056609.1	146435	GCA_013741855.1_ASM1374185v1_bin_3	8905	9059	HyAsP	104435	0.713183323658961	0.061	8905	0.983	0.115	0	0	no	0	0	no	no	NA	NA	NA	NA
GCA_013741855.1_ASM1374185v1	CP056609.1	146435	GCA_013741855.1_ASM1374185v1_bin_8	4868	82026	HyAsP	104435	0.713183323658961	0.033	2434	0.03	0.031	0	0	no	0	0	no	no	NA	NA	NA	NA
GCA_013741855.1_ASM1374185v1	CP056609.1	146435	GCA_013741855.1_ASM1374185v1_bin_11	17465	17186	HyAsP	104435	0.713183323658961	0.119	13704	0.797	0.207	0	0	no	0	0	no	no	NA	NA	NA	NA
GCA_013741855.1_ASM1374185v1	CP056609.1	146435	GCA_013741855.1_ASM1374185v1_bin_6	31436	249705	HyAsP	104435	0.713183323658961	0.215	31436	0.126	0.159	186067	0.745147273783064	no	0	0	no	no	NA	NA	NA	NA
GCA_013741855.1_ASM1374185v1	CP056609.1	146435	GCA_013741855.1_ASM1374185v1_bin_9	1017	1017	HyAsP	104435	0.713183323658961	0.007	1017	1	0.014	0	0	no	0	0	no	no	NA	NA	NA	NA
GCA_013741855.1_ASM1374185v1	CP056609.1	146435	GCA_013741855.1_ASM1374185v1_bin_7	3567	10809	HyAsP	104435	0.713183323658961	0.024	3567	0.33	0.045	1449	0.134054954204829	no	0	0	no	no	NA	NA	NA	NA
GCA_013741855.1_ASM1374185v1	CP056610.1	97721	GCA_013741855.1_ASM1374185v1_bin_8	76579	82026	HyAsP	84687	0.86662027609214	0.784	76579	0.934	0.852	0	0	no	0	0	no	no	NA	NA	NA	NA
GCA_013741855.1_ASM1374185v1	CP056610.1	97721	GCA_013741855.1_ASM1374185v1_bin_6	2257	249705	HyAsP	84687	0.86662027609214	0.023	2257	0.009	0.013	186067	0.745147273783064	no	0	0	no	no	NA	NA	NA	NA
GCA_013741855.1_ASM1374185v1	CP056611.1	4072	GCA_013741855.1_ASM1374185v1_bin_1	4043	4149	HyAsP	4043	0.992878192534381	0.993	4043	0.974	0.983	0	0	yes	0	0	no	no	NA	NA	NA	NA
GCA_013741855.1_ASM1374185v1	CP056612.1	1565	GCA_013741855.1_ASM1374185v1_bin_2	1565	1642	HyAsP	1565	1	1	1565	0.953	0.976	0	0	yes	0	0	no	no	NA	NA	NA	NA
GCA_013742135.1_ASM1374213v1	CP056614.1	146436	GCA_013742135.1_ASM1374213v1_bin_5	10503	49964	HyAsP	106797	0.72930836679505	0.072	10503	0.21	0.107	31896	0.638379633336002	no	0	0	no	no	NA	NA	NA	NA
GCA_013742135.1_ASM1374213v1	CP056614.1	146436	GCA_013742135.1_ASM1374213v1_bin_9	6036	3679	HyAsP	106797	0.72930836679505	0.041	3602	0.979	0.079	0	0	no	0	0	no	no	NA	NA	NA	NA
GCA_013742135.1_ASM1374213v1	CP056614.1	146436	GCA_013742135.1_ASM1374213v1_bin_3	14766	165852	HyAsP	106797	0.72930836679505	0.101	12332	0.074	0.085	145965	0.880091889154186	no	0	0	no	no	NA	NA	NA	NA
GCA_013742135.1_ASM1374213v1	CP056614.1	146436	GCA_013742135.1_ASM1374213v1_bin_2	8905	10816	HyAsP	106797	0.72930836679505	0.061	8905	0.823	0.114	1449	0.133968195266272	no	0	0	no	no	NA	NA	NA	NA
GCA_013742135.1_ASM1374213v1	CP056614.1	146436	GCA_013742135.1_ASM1374213v1_bin_8	33985	42929	HyAsP	106797	0.72930836679505	0.232	30224	0.704	0.349	0	0	no	0	0	no	no	NA	NA	NA	NA
GCA_013742135.1_ASM1374213v1	CP056615.1	97721	GCA_013742135.1_ASM1374213v1_bin_6	76579	84654	HyAsP	84687	0.86662027609214	0.784	76579	0.905	0.84	0	0	no	0	0	no	no	NA	NA	NA	NA
GCA_013742135.1_ASM1374213v1	CP056615.1	97721	GCA_013742135.1_ASM1374213v1_bin_7	2257	7231	HyAsP	84687	0.86662027609214	0.023	2257	0.312	0.043	0	0	no	0	0	no	no	NA	NA	NA	NA
GCA_013742135.1_ASM1374213v1	CP056616.1	4072	GCA_013742135.1_ASM1374213v1_bin_1	4072	4149	HyAsP	4072	1	1	4072	0.981	0.99	0	0	yes	0	0	no	no	NA	NA	NA	NA
GCA_013742135.1_ASM1374213v1	CP056617.1	1565	not_detected	0	not_applicable	HyAsP	1565	1	NA	0	NA	NA	not_applicable	not_applicable	no	0	0	no	no	NA	NA	NA	NA
GCA_013742835.1_ASM1374283v1	CP056626.1	153071	GCA_013742835.1_ASM1374283v1_bin_9	1181	1462	HyAsP	118070	0.771341403662353	0.008	1181	0.808	0.016	1181	0.807797537619699	no	0	0	no	no	NA	NA	NA	NA
GCA_013742835.1_ASM1374283v1	CP056626.1	153071	GCA_013742835.1_ASM1374283v1_bin_7	2732	5021	HyAsP	118070	0.771341403662353	0.018	1366	0.272	0.034	2832	0.564031069508066	no	0	0	no	no	NA	NA	NA	NA
GCA_013742835.1_ASM1374283v1	CP056626.1	153071	GCA_013742835.1_ASM1374283v1_bin_8	57866	115321	HyAsP	118070	0.771341403662353	0.378	57866	0.502	0.431	0	0	no	0	0	no	no	NA	NA	NA	NA
GCA_013742835.1_ASM1374283v1	CP056626.1	153071	GCA_013742835.1_ASM1374283v1_bin_14	6387	125389	HyAsP	118070	0.771341403662353	0.042	4996	0.04	0.041	112972	0.900972174592668	no	0	0	no	no	NA	NA	NA	NA
GCA_013742835.1_ASM1374283v1	CP056626.1	153071	GCA_013742835.1_ASM1374283v1_bin_11	12657	36112	HyAsP	118070	0.771341403662353	0.083	11291	0.313	0.131	5359	0.148399424014178	no	0	0	no	no	NA	NA	NA	NA
GCA_013742835.1_ASM1374283v1	CP056626.1	153071	GCA_013742835.1_ASM1374283v1_bin_5	19238	24606	HyAsP	118070	0.771341403662353	0.126	19238	0.782	0.217	0	0	no	0	0	no	no	NA	NA	NA	NA
GCA_013742835.1_ASM1374283v1	CP056627.1	128439	GCA_013742835.1_ASM1374283v1_bin_9	2362	1462	HyAsP	104306	0.812105357407018	0.018	1181	0.808	0.035	1181	0.807797537619699	no	0	0	no	no	NA	NA	NA	NA
GCA_013742835.1_ASM1374283v1	CP056627.1	128439	GCA_013742835.1_ASM1374283v1_bin_12	4555	73023	HyAsP	104306	0.812105357407018	0.035	4555	0.062	0.045	66224	0.906892348985936	no	0	0	no	no	NA	NA	NA	NA
GCA_013742835.1_ASM1374283v1	CP056627.1	128439	GCA_013742835.1_ASM1374283v1_bin_8	45264	115321	HyAsP	104306	0.812105357407018	0.352	45264	0.393	0.371	0	0	no	0	0	no	no	NA	NA	NA	NA
GCA_013742835.1_ASM1374283v1	CP056627.1	128439	GCA_013742835.1_ASM1374283v1_bin_10	1343	1343	HyAsP	104306	0.812105357407018	0.01	1343	1	0.02	1343	1	no	0	0	no	no	NA	NA	NA	NA
GCA_013742835.1_ASM1374283v1	CP056627.1	128439	GCA_013742835.1_ASM1374283v1_bin_3	6524	6524	HyAsP	104306	0.812105357407018	0.051	6524	1	0.097	0	0	no	0	0	no	no	NA	NA	NA	NA
GCA_013742835.1_ASM1374283v1	CP056627.1	128439	GCA_013742835.1_ASM1374283v1_bin_11	21180	36112	HyAsP	104306	0.812105357407018	0.165	18090	0.501	0.248	5359	0.148399424014178	no	0	0	no	no	NA	NA	NA	NA
GCA_013742835.1_ASM1374283v1	CP056627.1	128439	GCA_013742835.1_ASM1374283v1_bin_5	5132	24606	HyAsP	104306	0.812105357407018	0.04	5132	0.209	0.067	0	0	no	0	0	no	no	NA	NA	NA	NA
GCA_013742835.1_ASM1374283v1	CP056627.1	128439	GCA_013742835.1_ASM1374283v1_bin_2	16019	25961	HyAsP	104306	0.812105357407018	0.125	16019	0.617	0.208	5342	0.205770193752167	no	0	0	no	no	NA	NA	NA	NA
GCA_013742835.1_ASM1374283v1	CP056628.1	4075	GCA_013742835.1_ASM1374283v1_bin_1	4075	10626	HyAsP	4075	1	1	4075	0.383	0.554	0	0	no	0	0	no	no	NA	NA	NA	NA
GCA_013742835.1_ASM1374283v1	CP056629.1	4018	GCA_013742835.1_ASM1374283v1_bin_1	3959	10626	HyAsP	3959	0.985316077650572	0.985	3959	0.373	0.541	0	0	no	0	0	no	no	NA	NA	NA	NA
GCA_013742835.1_ASM1374283v1	CP056630.1	1917	GCA_013742835.1_ASM1374283v1_bin_1	1917	10626	HyAsP	1917	1	1	1917	0.18	0.305	0	0	no	0	0	no	no	NA	NA	NA	NA
GCA_013742835.1_ASM1374283v1	CP056631.1	1610	not_detected	0	not_applicable	HyAsP	1610	1	NA	0	NA	NA	not_applicable	not_applicable	no	0	0	no	no	NA	NA	NA	NA
GCA_013744185.1_ASM1374418v1	CP056656.1	116506	GCA_013744185.1_ASM1374418v1_bin_4	110891	145430	HyAsP	112073	0.961950457487168	0.952	110891	0.763	0.847	27104	0.186371450182218	no	0	0	no	no	NA	NA	NA	NA
GCA_013744185.1_ASM1374418v1	CP056657.1	4401	not_detected	0	not_applicable	HyAsP	4389	0.997273346966599	NA	0	NA	NA	not_applicable	not_applicable	no	0	0	no	no	NA	NA	NA	NA
GCA_013744185.1_ASM1374418v1	CP056658.1	4315	not_detected	0	not_applicable	HyAsP	4315	1	NA	0	NA	NA	not_applicable	not_applicable	no	0	0	no	no	NA	NA	NA	NA
GCA_013744185.1_ASM1374418v1	CP056659.1	4161	not_detected	0	not_applicable	HyAsP	4161	1	NA	0	NA	NA	not_applicable	not_applicable	no	0	0	no	no	NA	NA	NA	NA
GCA_013744185.1_ASM1374418v1	CP056660.1	3675	not_detected	0	not_applicable	HyAsP	3496	0.951292517006803	NA	0	NA	NA	not_applicable	not_applicable	no	0	0	no	no	NA	NA	NA	NA
GCA_013744185.1_ASM1374418v1	CP056661.1	2865	not_detected	0	not_applicable	HyAsP	2865	1	NA	0	NA	NA	not_applicable	not_applicable	no	0	0	no	no	NA	NA	NA	NA
GCA_013745955.1_ASM1374595v1	CP056358.1	119656	GCA_013745955.1_ASM1374595v1_bin_3	98273	103724	HyAsP	112142	0.937203316173029	0.821	98273	0.947	0.88	0	0	no	0	0	no	no	NA	NA	NA	NA
GCA_013745955.1_ASM1374595v1	CP056358.1	119656	GCA_013745955.1_ASM1374595v1_bin_2	8926	8926	HyAsP	112142	0.937203316173029	0.075	8926	1	0.14	0	0	no	0	0	no	no	NA	NA	NA	NA
GCA_013745955.1_ASM1374595v1	CP056359.1	4116	not_detected	0	not_applicable	HyAsP	4113	0.999271137026239	NA	0	NA	NA	not_applicable	not_applicable	no	0	0	no	no	NA	NA	NA	NA
GCA_013745955.1_ASM1374595v1	CP056360.1	4073	GCA_013745955.1_ASM1374595v1_bin_1	4073	4150	HyAsP	4073	1	1	4073	0.981	0.99	0	0	yes	0	0	no	no	NA	NA	NA	NA
GCA_013746875.1_ASM1374687v1	CP056397.1	7536	GCA_013746875.1_ASM1374687v1_bin_7	4328	16488	HyAsP	6427	0.852839702760085	0.574	4328	0.262	0.36	10305	0.625	no	0	0	no	no	NA	NA	NA	NA
GCA_013746875.1_ASM1374687v1	CP056398.1	2292	not_detected	0	not_applicable	HyAsP	0	0	NA	0	NA	NA	not_applicable	not_applicable	no	0	0	no	no	NA	NA	NA	NA
GCA_013748455.1_ASM1374845v1	CP056471.1	109013	GCA_013748455.1_ASM1374845v1_bin_25	3137	6859	HyAsP	69997	0.64209773146322	0.029	3137	0.457	0.055	0	0	no	4	0	yes	no	NA	NA	NA	NA
GCA_013748455.1_ASM1374845v1	CP056471.1	109013	GCA_013748455.1_ASM1374845v1_bin_7	7062	7721	HyAsP	69997	0.64209773146322	0.065	2354	0.305	0.107	0	0	no	4	0	yes	no	NA	NA	NA	NA
GCA_013748455.1_ASM1374845v1	CP056471.1	109013	GCA_013748455.1_ASM1374845v1_bin_21	1670	5922	HyAsP	69997	0.64209773146322	0.015	1670	0.282	0.028	0	0	no	4	0	yes	no	NA	NA	NA	NA
GCA_013748455.1_ASM1374845v1	CP056471.1	109013	GCA_013748455.1_ASM1374845v1_bin_1	8476	5525	HyAsP	69997	0.64209773146322	0.078	3768	0.682	0.14	0	0	no	4	0	yes	no	NA	NA	NA	NA
GCA_013748455.1_ASM1374845v1	CP056471.1	109013	GCA_013748455.1_ASM1374845v1_bin_24	6610	19717	HyAsP	69997	0.64209773146322	0.061	6610	0.335	0.103	4283	0.217223715575392	no	4	0	yes	no	NA	NA	NA	NA
GCA_013748455.1_ASM1374845v1	CP056471.1	109013	GCA_013748455.1_ASM1374845v1_bin_2	1443	1443	HyAsP	69997	0.64209773146322	0.013	1443	1	0.026	1443	1	no	4	0	yes	no	NA	NA	NA	NA
GCA_013748455.1_ASM1374845v1	CP056471.1	109013	GCA_013748455.1_ASM1374845v1_bin_11	3610	8438	HyAsP	69997	0.64209773146322	0.033	3610	0.428	0.061	0	0	no	4	0	yes	no	NA	NA	NA	NA
GCA_013748455.1_ASM1374845v1	CP056471.1	109013	GCA_013748455.1_ASM1374845v1_bin_3	10703	10703	HyAsP	69997	0.64209773146322	0.098	10703	1	0.179	0	0	no	4	0	yes	no	4	4	4	1
GCA_013748455.1_ASM1374845v1	CP056471.1	109013	GCA_013748455.1_ASM1374845v1_bin_8	14839	15481	HyAsP	69997	0.64209773146322	0.136	14839	0.959	0.238	0	0	no	4	0	yes	no	NA	NA	NA	NA
GCA_013748455.1_ASM1374845v1	CP056471.1	109013	GCA_013748455.1_ASM1374845v1_bin_16	13488	16758	HyAsP	69997	0.64209773146322	0.124	13488	0.805	0.215	0	0	no	4	0	yes	no	NA	NA	NA	NA
GCA_013748455.1_ASM1374845v1	CP056471.1	109013	GCA_013748455.1_ASM1374845v1_bin_14	3223	7282	HyAsP	69997	0.64209773146322	0.03	3223	0.443	0.056	1994	0.273825872013183	no	4	0	yes	no	NA	NA	NA	NA
GCA_013748455.1_ASM1374845v1	CP056472.1	72712	GCA_013748455.1_ASM1374845v1_bin_6	1216	1216	HyAsP	44211	0.608028936076576	0.017	1216	1	0.033	0	0	no	0	0	no	no	NA	NA	NA	NA
GCA_013748455.1_ASM1374845v1	CP056472.1	72712	GCA_013748455.1_ASM1374845v1_bin_10	2443	6065	HyAsP	44211	0.608028936076576	0.034	2443	0.403	0.063	0	0	no	0	0	no	no	NA	NA	NA	NA
GCA_013748455.1_ASM1374845v1	CP056472.1	72712	GCA_013748455.1_ASM1374845v1_bin_4	2209	5046	HyAsP	44211	0.608028936076576	0.03	2209	0.438	0.056	0	0	no	0	0	no	no	NA	NA	NA	NA
GCA_013748455.1_ASM1374845v1	CP056472.1	72712	GCA_013748455.1_ASM1374845v1_bin_7	3386	7721	HyAsP	44211	0.608028936076576	0.047	3386	0.439	0.085	0	0	no	0	0	no	no	NA	NA	NA	NA
GCA_013748455.1_ASM1374845v1	CP056472.1	72712	GCA_013748455.1_ASM1374845v1_bin_19	1032	2356	HyAsP	44211	0.608028936076576	0.014	1032	0.438	0.027	0	0	no	0	0	no	no	NA	NA	NA	NA
GCA_013748455.1_ASM1374845v1	CP056472.1	72712	GCA_013748455.1_ASM1374845v1_bin_1	3768	5525	HyAsP	44211	0.608028936076576	0.052	3768	0.682	0.097	0	0	no	0	0	no	no	NA	NA	NA	NA
GCA_013748455.1_ASM1374845v1	CP056472.1	72712	GCA_013748455.1_ASM1374845v1_bin_24	1468	19717	HyAsP	44211	0.608028936076576	0.02	1468	0.074	0.031	4283	0.217223715575392	no	0	0	no	no	NA	NA	NA	NA
GCA_013748455.1_ASM1374845v1	CP056472.1	72712	GCA_013748455.1_ASM1374845v1_bin_13	32075	41836	HyAsP	44211	0.608028936076576	0.441	32075	0.767	0.56	0	0	no	0	0	no	no	NA	NA	NA	NA
GCA_013748665.1_ASM1374866v1	CP056493.1	77183	GCA_013748665.1_ASM1374866v1_bin_10	2401	6150	HyAsP	46395	0.601103870023192	0.031	2401	0.39	0.057	0	0	no	4	0	yes	no	NA	NA	NA	NA
GCA_013748665.1_ASM1374866v1	CP056493.1	77183	GCA_013748665.1_ASM1374866v1_bin_24	5304	12578	HyAsP	46395	0.601103870023192	0.069	5304	0.422	0.119	0	0	no	4	0	yes	no	NA	NA	NA	NA
GCA_013748665.1_ASM1374866v1	CP056493.1	77183	GCA_013748665.1_ASM1374866v1_bin_20	10757	14427	HyAsP	46395	0.601103870023192	0.139	10757	0.746	0.234	0	0	no	4	0	yes	no	NA	NA	NA	NA
GCA_013748665.1_ASM1374866v1	CP056493.1	77183	GCA_013748665.1_ASM1374866v1_bin_2	10703	10703	HyAsP	46395	0.601103870023192	0.139	10703	1	0.244	0	0	no	4	0	yes	no	4	4	4	1
GCA_013748665.1_ASM1374866v1	CP056493.1	77183	GCA_013748665.1_ASM1374866v1_bin_5	2395	5539	HyAsP	46395	0.601103870023192	0.031	2395	0.432	0.058	0	0	no	4	0	yes	no	NA	NA	NA	NA
GCA_013748665.1_ASM1374866v1	CP056493.1	77183	GCA_013748665.1_ASM1374866v1_bin_16	1414	2299	HyAsP	46395	0.601103870023192	0.018	1414	0.615	0.035	0	0	no	4	0	yes	no	NA	NA	NA	NA
GCA_013748665.1_ASM1374866v1	CP056493.1	77183	GCA_013748665.1_ASM1374866v1_bin_19	3137	3746	HyAsP	46395	0.601103870023192	0.041	3137	0.837	0.078	0	0	no	4	0	yes	no	NA	NA	NA	NA
GCA_013748665.1_ASM1374866v1	CP056493.1	77183	GCA_013748665.1_ASM1374866v1_bin_6	5030	6971	HyAsP	46395	0.601103870023192	0.065	5030	0.722	0.119	0	0	no	4	0	yes	no	NA	NA	NA	NA
GCA_013748665.1_ASM1374866v1	CP056494.1	74158	GCA_013748665.1_ASM1374866v1_bin_4	2209	3343	HyAsP	49548	0.668140996251247	0.03	2209	0.661	0.057	0	0	no	0	0	no	no	NA	NA	NA	NA
GCA_013748665.1_ASM1374866v1	CP056494.1	74158	GCA_013748665.1_ASM1374866v1_bin_10	5357	6150	HyAsP	49548	0.668140996251247	0.072	5357	0.871	0.133	0	0	no	0	0	no	no	NA	NA	NA	NA
GCA_013748665.1_ASM1374866v1	CP056494.1	74158	GCA_013748665.1_ASM1374866v1_bin_20	2092	14427	HyAsP	49548	0.668140996251247	0.028	2092	0.145	0.047	0	0	no	0	0	no	no	NA	NA	NA	NA
GCA_013748665.1_ASM1374866v1	CP056494.1	74158	GCA_013748665.1_ASM1374866v1_bin_7	15878	16041	HyAsP	49548	0.668140996251247	0.214	15878	0.99	0.352	0	0	no	0	0	no	no	NA	NA	NA	NA
GCA_013748665.1_ASM1374866v1	CP056494.1	74158	GCA_013748665.1_ASM1374866v1_bin_8	2911	4006	HyAsP	49548	0.668140996251247	0.039	2911	0.727	0.074	1443	0.360209685471792	no	0	0	no	no	NA	NA	NA	NA
GCA_013748665.1_ASM1374866v1	CP056494.1	74158	GCA_013748665.1_ASM1374866v1_bin_25	3692	3692	HyAsP	49548	0.668140996251247	0.05	3692	1	0.095	0	0	no	0	0	no	no	NA	NA	NA	NA
GCA_013748665.1_ASM1374866v1	CP056494.1	74158	GCA_013748665.1_ASM1374866v1_bin_18	1443	1836	HyAsP	49548	0.668140996251247	0.019	1443	0.786	0.037	1443	0.785947712418301	no	0	0	no	no	NA	NA	NA	NA
GCA_013748665.1_ASM1374866v1	CP056494.1	74158	GCA_013748665.1_ASM1374866v1_bin_14	7710	7710	HyAsP	49548	0.668140996251247	0.104	7710	1	0.188	0	0	no	0	0	no	no	NA	NA	NA	NA
GCA_013748665.1_ASM1374866v1	CP056494.1	74158	GCA_013748665.1_ASM1374866v1_bin_16	1414	2299	HyAsP	49548	0.668140996251247	0.019	1414	0.615	0.037	0	0	no	0	0	no	no	NA	NA	NA	NA
GCA_013748665.1_ASM1374866v1	CP056494.1	74158	GCA_013748665.1_ASM1374866v1_bin_12	1216	1216	HyAsP	49548	0.668140996251247	0.016	1216	1	0.031	0	0	no	0	0	no	no	NA	NA	NA	NA
GCA_013748665.1_ASM1374866v1	CP056494.1	74158	GCA_013748665.1_ASM1374866v1_bin_3	4442	5323	HyAsP	49548	0.668140996251247	0.06	4442	0.834	0.112	0	0	no	0	0	no	no	NA	NA	NA	NA
GCA_013748665.1_ASM1374866v1	CP056494.1	74158	GCA_013748665.1_ASM1374866v1_bin_6	3815	6971	HyAsP	49548	0.668140996251247	0.051	3815	0.547	0.093	0	0	no	0	0	no	no	NA	NA	NA	NA
GCA_013749295.1_ASM1374929v1	CP056525.1	132310	GCA_013749295.1_ASM1374929v1_bin_6	2627	4240	HyAsP	114325	0.864069231350616	0.02	2627	0.62	0.039	0	0	no	5	0	yes	no	NA	NA	NA	NA
GCA_013749295.1_ASM1374929v1	CP056525.1	132310	GCA_013749295.1_ASM1374929v1_bin_5	1778	2686	HyAsP	114325	0.864069231350616	0.013	1778	0.662	0.025	1778	0.661950856291884	no	5	0	yes	no	NA	NA	NA	NA
GCA_013749295.1_ASM1374929v1	CP056525.1	132310	GCA_013749295.1_ASM1374929v1_bin_2	28214	31376	HyAsP	114325	0.864069231350616	0.213	28214	0.899	0.344	0	0	no	5	0	yes	no	NA	NA	NA	NA
GCA_013749295.1_ASM1374929v1	CP056525.1	132310	GCA_013749295.1_ASM1374929v1_bin_4	10066	18213	HyAsP	114325	0.864069231350616	0.076	10066	0.553	0.134	6091	0.334431450063142	no	5	0	yes	no	NA	NA	NA	NA
GCA_013749295.1_ASM1374929v1	CP056525.1	132310	GCA_013749295.1_ASM1374929v1_bin_3	54492	120800	HyAsP	114325	0.864069231350616	0.412	54492	0.451	0.431	57330	0.474586092715232	no	5	0	yes	no	5	6	5	1
GCA_013749295.1_ASM1374929v1	CP056526.1	4074	GCA_013749295.1_ASM1374929v1_bin_1	4074	4151	HyAsP	4074	1	1	4074	0.981	0.99	0	0	yes	0	0	no	no	NA	NA	NA	NA
GCA_013749975.1_ASM1374997v1	CP056557.1	107875	GCA_013749975.1_ASM1374997v1_bin_9	2480	4472	HyAsP	80085	0.742387022016223	0.023	2480	0.555	0.044	0	0	no	0	0	no	no	NA	NA	NA	NA
GCA_013749975.1_ASM1374997v1	CP056557.1	107875	GCA_013749975.1_ASM1374997v1_bin_8	6662	8658	HyAsP	80085	0.742387022016223	0.062	6662	0.769	0.115	1310	0.151305151305151	no	0	0	no	no	NA	NA	NA	NA
GCA_013749975.1_ASM1374997v1	CP056557.1	107875	GCA_013749975.1_ASM1374997v1_bin_5	1310	97909	HyAsP	80085	0.742387022016223	0.012	1310	0.013	0.012	94995	0.97023766967286	no	0	0	no	no	NA	NA	NA	NA
GCA_013749975.1_ASM1374997v1	CP056557.1	107875	GCA_013749975.1_ASM1374997v1_bin_4	2173	42120	HyAsP	80085	0.742387022016223	0.02	2173	0.052	0.029	0	0	no	0	0	no	no	NA	NA	NA	NA
GCA_013749975.1_ASM1374997v1	CP056557.1	107875	GCA_013749975.1_ASM1374997v1_bin_1	1443	1443	HyAsP	80085	0.742387022016223	0.013	1443	1	0.026	1443	1	no	0	0	no	no	NA	NA	NA	NA
GCA_013749975.1_ASM1374997v1	CP056558.1	75959	GCA_013749975.1_ASM1374997v1_bin_4	41152	42120	HyAsP	63981	0.842309667057228	0.542	41152	0.977	0.697	0	0	no	0	0	no	no	NA	NA	NA	NA
GCA_013749975.1_ASM1374997v1	CP056558.1	75959	GCA_013749975.1_ASM1374997v1_bin_7	1184	1448	HyAsP	63981	0.842309667057228	0.016	1184	0.818	0.031	0	0	no	0	0	no	no	NA	NA	NA	NA
GCA_013749975.1_ASM1374997v1	CP056558.1	75959	GCA_013749975.1_ASM1374997v1_bin_2	3212	3389	HyAsP	63981	0.842309667057228	0.042	3212	0.948	0.08	0	0	no	0	0	no	no	NA	NA	NA	NA
GCA_013750375.1_ASM1375037v1	CP056566.1	13429	GCA_013750375.1_ASM1375037v1_bin_4	12812	13659	HyAsP	12812	0.954054657830069	0.954	12812	0.938	0.946	0	0	no	0	0	no	no	NA	NA	NA	NA
GCA_013750815.1_ASM1375081v1	CP056570.1	114257	GCA_013750815.1_ASM1375081v1_bin_11	19678	27782	HyAsP	76392	0.668597985243793	0.172	18534	0.667	0.273	4327	0.155748326254409	no	0	0	no	no	NA	NA	NA	NA
GCA_013750815.1_ASM1375081v1	CP056570.1	114257	GCA_013750815.1_ASM1375081v1_bin_15	6977	16453	HyAsP	76392	0.668597985243793	0.061	6977	0.424	0.107	0	0	no	0	0	no	no	NA	NA	NA	NA
GCA_013750815.1_ASM1375081v1	CP056570.1	114257	GCA_013750815.1_ASM1375081v1_bin_12	11756	12100	HyAsP	76392	0.668597985243793	0.103	11756	0.972	0.186	0	0	no	0	0	no	no	NA	NA	NA	NA
GCA_013750815.1_ASM1375081v1	CP056570.1	114257	GCA_013750815.1_ASM1375081v1_bin_4	2131	8233	HyAsP	76392	0.668597985243793	0.019	2131	0.259	0.035	2131	0.258836390137253	no	0	0	no	no	NA	NA	NA	NA
GCA_013750815.1_ASM1375081v1	CP056570.1	114257	GCA_013750815.1_ASM1375081v1_bin_16	9946	11905	HyAsP	76392	0.668597985243793	0.087	9946	0.835	0.158	0	0	no	0	0	no	no	NA	NA	NA	NA
GCA_013750815.1_ASM1375081v1	CP056570.1	114257	GCA_013750815.1_ASM1375081v1_bin_13	21245	23796	HyAsP	76392	0.668597985243793	0.186	21245	0.893	0.308	0	0	no	0	0	no	no	NA	NA	NA	NA
GCA_013750815.1_ASM1375081v1	CP056570.1	114257	GCA_013750815.1_ASM1375081v1_bin_3	1612	1612	HyAsP	76392	0.668597985243793	0.014	1612	1	0.028	0	0	no	0	0	no	no	NA	NA	NA	NA
GCA_013750815.1_ASM1375081v1	CP056570.1	114257	GCA_013750815.1_ASM1375081v1_bin_19	3980	5759	HyAsP	76392	0.668597985243793	0.035	2836	0.492	0.065	0	0	no	0	0	no	no	NA	NA	NA	NA
GCA_013750815.1_ASM1375081v1	CP056570.1	114257	GCA_013750815.1_ASM1375081v1_bin_21	2131	3591	HyAsP	76392	0.668597985243793	0.019	2131	0.593	0.037	2131	0.593428014480646	no	0	0	no	no	NA	NA	NA	NA
GCA_013750815.1_ASM1375081v1	CP056570.1	114257	GCA_013750815.1_ASM1375081v1_bin_14	1355	1755	HyAsP	76392	0.668597985243793	0.012	1355	0.772	0.024	0	0	no	0	0	no	no	NA	NA	NA	NA
GCA_013750815.1_ASM1375081v1	CP056570.1	114257	GCA_013750815.1_ASM1375081v1_bin_8	2360	2360	HyAsP	76392	0.668597985243793	0.021	2360	1	0.041	2360	1	no	0	0	no	no	NA	NA	NA	NA
GCA_013750815.1_ASM1375081v1	CP056571.1	78143	GCA_013750815.1_ASM1375081v1_bin_6	2352	2687	HyAsP	42250	0.540675428381301	0.03	2352	0.875	0.058	0	0	no	1	0	yes	no	NA	NA	NA	NA
GCA_013750815.1_ASM1375081v1	CP056571.1	78143	GCA_013750815.1_ASM1375081v1_bin_5	1846	2409	HyAsP	42250	0.540675428381301	0.024	1846	0.766	0.047	0	0	no	1	0	yes	no	NA	NA	NA	NA
GCA_013750815.1_ASM1375081v1	CP056571.1	78143	GCA_013750815.1_ASM1375081v1_bin_2	1979	2302	HyAsP	42250	0.540675428381301	0.025	1979	0.86	0.049	0	0	no	1	0	yes	no	NA	NA	NA	NA
GCA_013750815.1_ASM1375081v1	CP056571.1	78143	GCA_013750815.1_ASM1375081v1_bin_15	8116	16453	HyAsP	42250	0.540675428381301	0.104	8116	0.493	0.172	0	0	no	1	0	yes	no	NA	NA	NA	NA
GCA_013750815.1_ASM1375081v1	CP056571.1	78143	GCA_013750815.1_ASM1375081v1_bin_4	3741	8233	HyAsP	42250	0.540675428381301	0.048	3741	0.454	0.087	2131	0.258836390137253	no	1	0	yes	no	NA	NA	NA	NA
GCA_013750815.1_ASM1375081v1	CP056571.1	78143	GCA_013750815.1_ASM1375081v1_bin_7	3238	3238	HyAsP	42250	0.540675428381301	0.041	3238	1	0.079	0	0	no	1	0	yes	no	1	1	1	1
GCA_013750815.1_ASM1375081v1	CP056571.1	78143	GCA_013750815.1_ASM1375081v1_bin_9	3992	3992	HyAsP	42250	0.540675428381301	0.051	3992	1	0.097	0	0	no	1	0	yes	no	NA	NA	NA	NA
GCA_013750815.1_ASM1375081v1	CP056571.1	78143	GCA_013750815.1_ASM1375081v1_bin_16	9946	11905	HyAsP	42250	0.540675428381301	0.127	9946	0.835	0.22	0	0	no	1	0	yes	no	NA	NA	NA	NA
GCA_013750815.1_ASM1375081v1	CP056571.1	78143	GCA_013750815.1_ASM1375081v1_bin_10	9343	10382	HyAsP	42250	0.540675428381301	0.12	9343	0.9	0.212	0	0	no	1	0	yes	no	NA	NA	NA	NA
GCA_013750815.1_ASM1375081v1	CP056571.1	78143	GCA_013750815.1_ASM1375081v1_bin_21	2131	3591	HyAsP	42250	0.540675428381301	0.027	2131	0.593	0.052	2131	0.593428014480646	no	1	0	yes	no	NA	NA	NA	NA
GCA_013750815.1_ASM1375081v1	CP056571.1	78143	GCA_013750815.1_ASM1375081v1_bin_14	1355	1755	HyAsP	42250	0.540675428381301	0.017	1355	0.772	0.033	0	0	no	1	0	yes	no	NA	NA	NA	NA
GCA_013750815.1_ASM1375081v1	CP056572.1	39529	GCA_013750815.1_ASM1375081v1_bin_1	3606	3606	HyAsP	39529	1	0.091	3606	1	0.167	0	0	no	0	0	no	no	NA	NA	NA	NA
GCA_013751495.1_ASM1375149v1	CP056585.1	149874	GCA_013751495.1_ASM1375149v1_bin_6	30620	36646	HyAsP	141245	0.942424970308392	0.204	29436	0.803	0.325	8210	0.224035365387764	no	0	0	no	no	NA	NA	NA	NA
GCA_013751495.1_ASM1375149v1	CP056585.1	149874	GCA_013751495.1_ASM1375149v1_bin_5	94228	94633	HyAsP	141245	0.942424970308392	0.629	94228	0.996	0.771	0	0	no	0	0	no	no	NA	NA	NA	NA
GCA_013752075.1_ASM1375207v1	CP056605.1	118906	GCA_013752075.1_ASM1375207v1_bin_16	29874	46849	HyAsP	104238	0.876642053386709	0.251	29874	0.638	0.36	0	0	no	0	0	no	no	NA	NA	NA	NA
GCA_013752075.1_ASM1375207v1	CP056605.1	118906	GCA_013752075.1_ASM1375207v1_bin_8	2285	3425	HyAsP	104238	0.876642053386709	0.019	2285	0.667	0.037	0	0	no	0	0	no	no	NA	NA	NA	NA
GCA_013752075.1_ASM1375207v1	CP056605.1	118906	GCA_013752075.1_ASM1375207v1_bin_21	1003	22098	HyAsP	104238	0.876642053386709	0.008	1003	0.045	0.014	16649	0.753416598787221	no	0	0	no	no	NA	NA	NA	NA
GCA_013752075.1_ASM1375207v1	CP056605.1	118906	GCA_013752075.1_ASM1375207v1_bin_18	1874	2007	HyAsP	104238	0.876642053386709	0.016	1874	0.934	0.031	0	0	no	0	0	no	no	NA	NA	NA	NA
GCA_013752075.1_ASM1375207v1	CP056605.1	118906	GCA_013752075.1_ASM1375207v1_bin_11	8388	9216	HyAsP	104238	0.876642053386709	0.071	8388	0.91	0.132	0	0	no	0	0	no	no	NA	NA	NA	NA
GCA_013752075.1_ASM1375207v1	CP056605.1	118906	GCA_013752075.1_ASM1375207v1_bin_10	43503	43979	HyAsP	104238	0.876642053386709	0.366	43503	0.989	0.534	0	0	no	0	0	no	no	NA	NA	NA	NA
GCA_013752075.1_ASM1375207v1	CP056605.1	118906	GCA_013752075.1_ASM1375207v1_bin_15	5763	9520	HyAsP	104238	0.876642053386709	0.048	5763	0.605	0.089	1003	0.105357142857143	no	0	0	no	no	NA	NA	NA	NA
GCA_013752075.1_ASM1375207v1	CP056605.1	118906	GCA_013752075.1_ASM1375207v1_bin_5	1574	3863	HyAsP	104238	0.876642053386709	0.013	1574	0.407	0.025	0	0	no	0	0	no	no	NA	NA	NA	NA
GCA_013752075.1_ASM1375207v1	CP056605.1	118906	GCA_013752075.1_ASM1375207v1_bin_3	2272	3898	HyAsP	104238	0.876642053386709	0.019	2272	0.583	0.037	2195	0.563109286813751	no	0	0	no	no	NA	NA	NA	NA
GCA_013752075.1_ASM1375207v1	CP056605.1	118906	GCA_013752075.1_ASM1375207v1_bin_20	2272	13853	HyAsP	104238	0.876642053386709	0.019	2272	0.164	0.034	11565	0.834837219374865	no	0	0	no	no	NA	NA	NA	NA
GCA_013752075.1_ASM1375207v1	CP056605.1	118906	GCA_013752075.1_ASM1375207v1_bin_13	7228	7228	HyAsP	104238	0.876642053386709	0.061	7228	1	0.115	0	0	no	0	0	no	no	NA	NA	NA	NA
GCA_013752075.1_ASM1375207v1	CP056606.1	108784	GCA_013752075.1_ASM1375207v1_bin_16	14792	46849	HyAsP	91030	0.836795852331225	0.136	14792	0.316	0.19	0	0	no	5	1	yes	yes	4	4	5	0.8
GCA_013752075.1_ASM1375207v1	CP056606.1	108784	GCA_013752075.1_ASM1375207v1_bin_17	66140	69875	HyAsP	91030	0.836795852331225	0.608	66140	0.947	0.741	0	0	no	5	1	yes	yes	NA	NA	NA	NA
GCA_013752075.1_ASM1375207v1	CP056606.1	108784	GCA_013752075.1_ASM1375207v1_bin_19	2141	19042	HyAsP	91030	0.836795852331225	0.02	2141	0.112	0.034	14673	0.770559815145468	no	5	1	yes	yes	NA	NA	NA	NA
GCA_013752075.1_ASM1375207v1	CP056606.1	108784	GCA_013752075.1_ASM1375207v1_bin_2	4382	4382	HyAsP	91030	0.836795852331225	0.04	4382	1	0.077	0	0	no	5	1	yes	yes	1	1	5	0.2
GCA_013752075.1_ASM1375207v1	CP056606.1	108784	GCA_013752075.1_ASM1375207v1_bin_23	1086	2057	HyAsP	91030	0.836795852331225	0.01	1086	0.528	0.02	0	0	no	5	1	yes	yes	NA	NA	NA	NA
GCA_013752075.1_ASM1375207v1	CP056606.1	108784	GCA_013752075.1_ASM1375207v1_bin_14	3556	14225	HyAsP	91030	0.836795852331225	0.033	3556	0.25	0.058	0	0	no	5	1	yes	yes	NA	NA	NA	NA
GCA_013752075.1_ASM1375207v1	CP056607.1	87886	GCA_013752075.1_ASM1375207v1_bin_19	1067	19042	HyAsP	73487	0.836162756297931	0.012	1067	0.056	0.02	14673	0.770559815145468	no	0	0	no	no	NA	NA	NA	NA
GCA_013752075.1_ASM1375207v1	CP056607.1	87886	GCA_013752075.1_ASM1375207v1_bin_12	7215	9571	HyAsP	73487	0.836162756297931	0.082	7215	0.754	0.148	0	0	no	0	0	no	no	NA	NA	NA	NA
GCA_013752075.1_ASM1375207v1	CP056607.1	87886	GCA_013752075.1_ASM1375207v1_bin_7	1400	1400	HyAsP	73487	0.836162756297931	0.016	1400	1	0.031	0	0	no	0	0	no	no	NA	NA	NA	NA
GCA_013752075.1_ASM1375207v1	CP056607.1	87886	GCA_013752075.1_ASM1375207v1_bin_23	1086	2057	HyAsP	73487	0.836162756297931	0.012	1086	0.528	0.023	0	0	no	0	0	no	no	NA	NA	NA	NA
GCA_013752075.1_ASM1375207v1	CP056607.1	87886	GCA_013752075.1_ASM1375207v1_bin_4	2483	3579	HyAsP	73487	0.836162756297931	0.028	2483	0.694	0.054	0	0	no	0	0	no	no	NA	NA	NA	NA
GCA_013752075.1_ASM1375207v1	CP056607.1	87886	GCA_013752075.1_ASM1375207v1_bin_14	2117	14225	HyAsP	73487	0.836162756297931	0.024	2117	0.149	0.041	0	0	no	0	0	no	no	NA	NA	NA	NA
GCA_013752075.1_ASM1375207v1	CP056607.1	87886	GCA_013752075.1_ASM1375207v1_bin_6	59186	59457	HyAsP	73487	0.836162756297931	0.673	59186	0.995	0.803	0	0	no	0	0	no	no	NA	NA	NA	NA
GCA_013752295.1_ASM1375229v1	CP056619.1	110691	GCA_013752295.1_ASM1375229v1_bin_3	6306	7736	HyAsP	109459	0.98886991715677	0.057	5004	0.647	0.105	0	0	no	1	0	yes	no	1	1	1	1
GCA_013752295.1_ASM1375229v1	CP056619.1	110691	GCA_013752295.1_ASM1375229v1_bin_6	103153	103737	HyAsP	109459	0.98886991715677	0.932	103153	0.994	0.962	0	0	yes	1	0	yes	no	NA	NA	NA	NA
GCA_013783465.1_ASM1378346v1	CP056349.1	83612	GCA_013783465.1_ASM1378346v1_bin_1	6374	6374	HyAsP	83612	1	0.076	6374	1	0.141	0	0	no	0	0	no	no	NA	NA	NA	NA
GCA_013783465.1_ASM1378346v1	CP056349.1	83612	GCA_013783465.1_ASM1378346v1_bin_2	77294	77294	HyAsP	83612	1	0.924	77294	1	0.96	0	0	yes	0	0	no	no	NA	NA	NA	NA
GCA_013783685.1_ASM1378368v1	CP056356.1	146879	GCA_013783685.1_ASM1378368v1_bin_19	1524	3608	HyAsP	135488	0.922446367418079	0.01	1524	0.422	0.02	1524	0.422394678492239	no	0	0	no	no	NA	NA	NA	NA
GCA_013783685.1_ASM1378368v1	CP056356.1	146879	GCA_013783685.1_ASM1378368v1_bin_16	17155	29006	HyAsP	135488	0.922446367418079	0.117	17155	0.591	0.195	11210	0.386471764462525	no	0	0	no	no	NA	NA	NA	NA
GCA_013783685.1_ASM1378368v1	CP056356.1	146879	GCA_013783685.1_ASM1378368v1_bin_3	8300	9048	HyAsP	135488	0.922446367418079	0.057	8300	0.917	0.107	0	0	no	0	0	no	no	NA	NA	NA	NA
GCA_013783685.1_ASM1378368v1	CP056356.1	146879	GCA_013783685.1_ASM1378368v1_bin_9	31232	31232	HyAsP	135488	0.922446367418079	0.213	31232	1	0.351	0	0	no	0	0	no	no	NA	NA	NA	NA
GCA_013783685.1_ASM1378368v1	CP056356.1	146879	GCA_013783685.1_ASM1378368v1_bin_17	44214	48768	HyAsP	135488	0.922446367418079	0.301	42083	0.863	0.446	0	0	no	0	0	no	no	NA	NA	NA	NA
GCA_013783905.1_ASM1378390v1	CP056371.1	118132	GCA_013783905.1_ASM1378390v1_bin_2	42204	44710	HyAsP	110721	0.937265093285477	0.357	42204	0.944	0.518	0	0	no	3	0	yes	no	3	3	3	1
GCA_013783905.1_ASM1378390v1	CP056371.1	118132	GCA_013783905.1_ASM1378390v1_bin_1	4997	4997	HyAsP	110721	0.937265093285477	0.042	4997	1	0.081	0	0	no	3	0	yes	no	NA	NA	NA	NA
GCA_013783905.1_ASM1378390v1	CP056371.1	118132	GCA_013783905.1_ASM1378390v1_bin_3	10848	10848	HyAsP	110721	0.937265093285477	0.092	10848	1	0.168	0	0	no	3	0	yes	no	NA	NA	NA	NA
GCA_013783905.1_ASM1378390v1	CP056371.1	118132	GCA_013783905.1_ASM1378390v1_bin_5	31359	32161	HyAsP	110721	0.937265093285477	0.265	28916	0.899	0.409	0	0	no	3	0	yes	no	NA	NA	NA	NA
GCA_013783905.1_ASM1378390v1	CP056371.1	118132	GCA_013783905.1_ASM1378390v1_bin_9	4886	2601	HyAsP	110721	0.937265093285477	0.041	2443	0.939	0.079	0	0	no	3	0	yes	no	NA	NA	NA	NA
GCA_013783905.1_ASM1378390v1	CP056371.1	118132	GCA_013783905.1_ASM1378390v1_bin_6	21313	21313	HyAsP	110721	0.937265093285477	0.18	21313	1	0.305	0	0	no	3	0	yes	no	NA	NA	NA	NA
GCA_013785265.1_ASM1378526v1	CP056482.1	1887	not_detected	0	not_applicable	HyAsP	1887	1	NA	0	NA	NA	not_applicable	not_applicable	no	0	0	no	no	NA	NA	NA	NA
GCA_013786125.1_ASM1378612v1	CP056621.1	96659	GCA_013786125.1_ASM1378612v1_bin_4	26599	28076	HyAsP	95945	0.992613207254368	0.275	26599	0.947	0.426	0	0	no	0	0	no	no	NA	NA	NA	NA
GCA_013786125.1_ASM1378612v1	CP056621.1	96659	GCA_013786125.1_ASM1378612v1_bin_3	69422	157565	HyAsP	95945	0.992613207254368	0.718	69422	0.441	0.546	87735	0.556817821216641	no	0	0	no	no	NA	NA	NA	NA
GCA_013786165.1_ASM1378616v1	CP056633.1	7462	GCA_013786165.1_ASM1378616v1_bin_3	7462	7539	HyAsP	7462	1	1	7462	0.99	0.995	0	0	yes	0	0	no	no	NA	NA	NA	NA
GCA_013786165.1_ASM1378616v1	CP056634.1	4072	GCA_013786165.1_ASM1378616v1_bin_1	4072	4149	HyAsP	4072	1	1	4072	0.981	0.99	0	0	yes	0	0	no	no	NA	NA	NA	NA
GCA_013789905.1_ASM1378990v1	CP056787.1	167752	GCA_013789905.1_ASM1378990v1_bin_7	117156	253473	HyAsP	151375	0.902373742190853	0.698	117156	0.462	0.556	122194	0.48207895910018	no	8	1	yes	yes	3	3	8	0.375
GCA_013789905.1_ASM1378990v1	CP056787.1	167752	GCA_013789905.1_ASM1378990v1_bin_4	9877	10795	HyAsP	151375	0.902373742190853	0.059	9877	0.915	0.111	0	0	no	8	1	yes	yes	1	1	8	0.125
GCA_013789905.1_ASM1378990v1	CP056787.1	167752	GCA_013789905.1_ASM1378990v1_bin_10	1316	4766	HyAsP	151375	0.902373742190853	0.008	1316	0.276	0.016	1316	0.276122534620227	no	8	1	yes	yes	NA	NA	NA	NA
GCA_013789905.1_ASM1378990v1	CP056787.1	167752	GCA_013789905.1_ASM1378990v1_bin_9	4887	4887	HyAsP	151375	0.902373742190853	0.029	4887	1	0.056	0	0	no	8	1	yes	yes	1	1	8	0.125
GCA_013789905.1_ASM1378990v1	CP056787.1	167752	GCA_013789905.1_ASM1378990v1_bin_5	11478	125770	HyAsP	151375	0.902373742190853	0.068	11478	0.091	0.078	0	0	no	8	1	yes	yes	3	3	8	0.375
GCA_013789905.1_ASM1378990v1	CP056788.1	111310	GCA_013789905.1_ASM1378990v1_bin_7	1056	253473	HyAsP	108931	0.978627257209595	0.009	1056	0.004	0.006	122194	0.48207895910018	no	0	0	no	no	NA	NA	NA	NA
GCA_013789905.1_ASM1378990v1	CP056788.1	111310	GCA_013789905.1_ASM1378990v1_bin_5	107950	125770	HyAsP	108931	0.978627257209595	0.97	107950	0.858	0.911	0	0	no	0	0	no	no	NA	NA	NA	NA
GCA_013789905.1_ASM1378990v1	CP056788.1	111310	GCA_013789905.1_ASM1378990v1_bin_12	1056	3057	HyAsP	108931	0.978627257209595	0.009	1056	0.345	0.018	2115	0.691854759568204	no	0	0	no	no	NA	NA	NA	NA
GCA_013789905.1_ASM1378990v1	CP056789.1	12602	GCA_013789905.1_ASM1378990v1_bin_6	3128	4992	HyAsP	10805	0.857403586732265	0.248	3128	0.627	0.355	0	0	no	0	0	no	no	NA	NA	NA	NA
GCA_013789905.1_ASM1378990v1	CP056789.1	12602	GCA_013789905.1_ASM1378990v1_bin_2	5627	5627	HyAsP	10805	0.857403586732265	0.447	5627	1	0.618	0	0	no	0	0	no	no	NA	NA	NA	NA
GCA_013789905.1_ASM1378990v1	CP056789.1	12602	GCA_013789905.1_ASM1378990v1_bin_1	2050	2349	HyAsP	10805	0.857403586732265	0.163	2050	0.873	0.275	0	0	no	0	0	no	no	NA	NA	NA	NA
GCA_013789905.1_ASM1378990v1	CP056790.1	3133	not_detected	0	not_applicable	HyAsP	0	0	NA	0	NA	NA	not_applicable	not_applicable	no	0	0	no	no	NA	NA	NA	NA
GCA_013789905.1_ASM1378990v1	CP056791.1	2088	GCA_013789905.1_ASM1378990v1_bin_3	2088	2165	HyAsP	2088	1	1	2088	0.964	0.982	0	0	yes	0	0	no	no	NA	NA	NA	NA
GCA_013789905.1_ASM1378990v1	CP056792.1	1976	not_detected	0	not_applicable	HyAsP	1976	1	NA	0	NA	NA	not_applicable	not_applicable	no	0	0	no	no	NA	NA	NA	NA
GCA_013789905.1_ASM1378990v1	CP056793.1	1551	not_detected	0	not_applicable	HyAsP	1551	1	NA	0	NA	NA	not_applicable	not_applicable	no	0	0	no	no	NA	NA	NA	NA
GCA_013790145.1_ASM1379014v1	CP056795.1	201308	GCA_013790145.1_ASM1379014v1_bin_12	147373	201015	HyAsP	200313	0.995057325093886	0.732	147373	0.733	0.732	26019	0.129438101634206	no	0	0	no	no	NA	NA	NA	NA
GCA_013790145.1_ASM1379014v1	CP056795.1	201308	GCA_013790145.1_ASM1379014v1_bin_8	52940	59670	HyAsP	200313	0.995057325093886	0.263	52940	0.887	0.406	6681	0.111965811965812	no	0	0	no	no	NA	NA	NA	NA
GCA_013790145.1_ASM1379014v1	CP056796.1	93185	GCA_013790145.1_ASM1379014v1_bin_16	61238	66743	HyAsP	88303	0.947609593818748	0.657	61238	0.918	0.766	1770	0.0265196350179045	no	0	0	no	no	NA	NA	NA	NA
GCA_013790145.1_ASM1379014v1	CP056796.1	93185	GCA_013790145.1_ASM1379014v1_bin_12	24202	201015	HyAsP	88303	0.947609593818748	0.26	24202	0.12	0.164	26019	0.129438101634206	no	0	0	no	no	NA	NA	NA	NA
GCA_013790145.1_ASM1379014v1	CP056797.1	92191	GCA_013790145.1_ASM1379014v1_bin_11	77466	77543	HyAsP	82685	0.89688798255795	0.84	77466	0.999	0.913	0	0	no	2	1	yes	yes	2	2	2	1
GCA_013790145.1_ASM1379014v1	CP056797.1	92191	GCA_013790145.1_ASM1379014v1_bin_18	5219	10798	HyAsP	82685	0.89688798255795	0.057	5219	0.483	0.102	0	0	no	2	1	yes	yes	NA	NA	NA	NA
GCA_013790145.1_ASM1379014v1	CP056798.1	69063	GCA_013790145.1_ASM1379014v1_bin_18	2036	10798	HyAsP	61097	0.884656038689313	0.029	2036	0.189	0.05	0	0	no	0	0	no	no	NA	NA	NA	NA
GCA_013790145.1_ASM1379014v1	CP056798.1	69063	GCA_013790145.1_ASM1379014v1_bin_3	1991	1991	HyAsP	61097	0.884656038689313	0.029	1991	1	0.056	0	0	no	0	0	no	no	NA	NA	NA	NA
GCA_013790145.1_ASM1379014v1	CP056798.1	69063	GCA_013790145.1_ASM1379014v1_bin_4	3031	3137	HyAsP	61097	0.884656038689313	0.044	3031	0.966	0.084	0	0	no	0	0	no	no	NA	NA	NA	NA
GCA_013790145.1_ASM1379014v1	CP056798.1	69063	GCA_013790145.1_ASM1379014v1_bin_10	54039	57731	HyAsP	61097	0.884656038689313	0.782	54039	0.936	0.852	0	0	no	0	0	no	no	NA	NA	NA	NA
GCA_013790145.1_ASM1379014v1	CP056799.1	41391	GCA_013790145.1_ASM1379014v1_bin_1	41391	41468	HyAsP	41391	1	1	41391	0.998	0.999	0	0	yes	0	0	no	no	NA	NA	NA	NA
GCA_013790245.1_ASM1379024v1	CP056801.1	114414	GCA_013790245.1_ASM1379024v1_bin_3	1469	90589	HyAsP	112740	0.985368923383502	0.013	1469	0.016	0.014	53819	0.594100829018976	no	1	1	yes	yes	1	2	1	1
GCA_013790245.1_ASM1379024v1	CP056801.1	114414	GCA_013790245.1_ASM1379024v1_bin_4	111423	161078	HyAsP	112740	0.985368923383502	0.974	109766	0.681	0.802	25719	0.159667986938005	no	1	1	yes	yes	NA	NA	NA	NA
GCA_013790245.1_ASM1379024v1	CP056802.1	79649	GCA_013790245.1_ASM1379024v1_bin_7	61516	77653	HyAsP	79275	0.995304398046429	0.772	61516	0.792	0.782	0	0	no	0	0	no	no	NA	NA	NA	NA
GCA_013790245.1_ASM1379024v1	CP056802.1	79649	GCA_013790245.1_ASM1379024v1_bin_3	10576	90589	HyAsP	79275	0.995304398046429	0.133	10576	0.117	0.124	53819	0.594100829018976	no	0	0	no	no	NA	NA	NA	NA
GCA_013790245.1_ASM1379024v1	CP056803.1	76107	GCA_013790245.1_ASM1379024v1_bin_7	13988	77653	HyAsP	67723	0.889839305188747	0.184	13988	0.18	0.182	0	0	no	2	0	yes	no	1	1	2	0.5
GCA_013790245.1_ASM1379024v1	CP056803.1	76107	GCA_013790245.1_ASM1379024v1_bin_2	2282	2282	HyAsP	67723	0.889839305188747	0.03	2282	1	0.058	2282	1	no	2	0	yes	no	NA	NA	NA	NA
GCA_013790245.1_ASM1379024v1	CP056803.1	76107	GCA_013790245.1_ASM1379024v1_bin_3	24129	90589	HyAsP	67723	0.889839305188747	0.317	24129	0.266	0.289	53819	0.594100829018976	no	2	0	yes	no	1	2	2	0.5
GCA_013790245.1_ASM1379024v1	CP056803.1	76107	GCA_013790245.1_ASM1379024v1_bin_4	23699	161078	HyAsP	67723	0.889839305188747	0.311	23699	0.147	0.2	25719	0.159667986938005	no	2	0	yes	no	NA	NA	NA	NA
GCA_013790245.1_ASM1379024v1	CP056804.1	5210	GCA_013790245.1_ASM1379024v1_bin_1	5210	5287	HyAsP	5210	1	1	5210	0.985	0.992	0	0	yes	0	0	no	no	NA	NA	NA	NA
GCA_013790245.1_ASM1379024v1	CP056805.1	5165	not_detected	0	not_applicable	HyAsP	4193	0.811810261374637	NA	0	NA	NA	not_applicable	not_applicable	no	0	0	no	no	NA	NA	NA	NA
GCA_013790245.1_ASM1379024v1	CP056806.1	1976	not_detected	0	not_applicable	HyAsP	1976	1	NA	0	NA	NA	not_applicable	not_applicable	no	0	0	no	no	NA	NA	NA	NA
GCA_013790245.1_ASM1379024v1	CP056807.1	1549	not_detected	0	not_applicable	HyAsP	1549	1	NA	0	NA	NA	not_applicable	not_applicable	no	0	0	no	no	NA	NA	NA	NA
GCA_013790245.1_ASM1379024v1	CP056808.1	1506	not_detected	0	not_applicable	HyAsP	1506	1	NA	0	NA	NA	not_applicable	not_applicable	no	0	0	no	no	NA	NA	NA	NA
GCA_013790285.1_ASM1379028v1	CP056811.1	133729	GCA_013790285.1_ASM1379028v1_bin_5	1413	5033	HyAsP	129883	0.971240344278354	0.011	1413	0.281	0.021	0	0	no	0	0	no	no	NA	NA	NA	NA
GCA_013790285.1_ASM1379028v1	CP056811.1	133729	GCA_013790285.1_ASM1379028v1_bin_3	119889	120279	HyAsP	129883	0.971240344278354	0.897	119889	0.997	0.944	0	0	no	0	0	no	no	NA	NA	NA	NA
GCA_013790285.1_ASM1379028v1	CP056812.1	36596	GCA_013790285.1_ASM1379028v1_bin_2	36596	36673	HyAsP	36596	1	1	36596	0.998	0.999	0	0	yes	0	0	no	no	NA	NA	NA	NA
GCA_013790285.1_ASM1379028v1	CP056813.1	3792	not_detected	0	not_applicable	HyAsP	3792	1	NA	0	NA	NA	not_applicable	not_applicable	no	0	0	no	no	NA	NA	NA	NA
GCA_013790285.1_ASM1379028v1	CP056814.1	2150	not_detected	0	not_applicable	HyAsP	2140	0.995348837209302	NA	0	NA	NA	not_applicable	not_applicable	no	0	0	no	no	NA	NA	NA	NA
GCA_013790285.1_ASM1379028v1	CP056815.1	1474	not_detected	0	not_applicable	HyAsP	0	0	NA	0	NA	NA	not_applicable	not_applicable	no	0	0	no	no	NA	NA	NA	NA
GCA_013790405.1_ASM1379040v1	CP056817.1	85970	GCA_013790405.1_ASM1379040v1_bin_5	1527	2844	HyAsP	67818	0.788856577876003	0.018	1527	0.537	0.035	0	0	no	0	0	no	no	NA	NA	NA	NA
GCA_013790405.1_ASM1379040v1	CP056817.1	85970	GCA_013790405.1_ASM1379040v1_bin_22	9569	14965	HyAsP	67818	0.788856577876003	0.111	9569	0.639	0.189	0	0	no	0	0	no	no	NA	NA	NA	NA
GCA_013790405.1_ASM1379040v1	CP056817.1	85970	GCA_013790405.1_ASM1379040v1_bin_3	1399	1542	HyAsP	67818	0.788856577876003	0.016	1399	0.907	0.031	0	0	no	0	0	no	no	NA	NA	NA	NA
GCA_013790405.1_ASM1379040v1	CP056817.1	85970	GCA_013790405.1_ASM1379040v1_bin_12	18997	22069	HyAsP	67818	0.788856577876003	0.221	18997	0.861	0.352	0	0	no	0	0	no	no	NA	NA	NA	NA
GCA_013790405.1_ASM1379040v1	CP056817.1	85970	GCA_013790405.1_ASM1379040v1_bin_15	36326	37905	HyAsP	67818	0.788856577876003	0.423	36326	0.958	0.587	0	0	no	0	0	no	no	NA	NA	NA	NA
GCA_013790405.1_ASM1379040v1	CP056818.1	84644	GCA_013790405.1_ASM1379040v1_bin_2	2156	2156	HyAsP	66652	0.787439156939653	0.025	2156	1	0.049	0	0	no	0	0	no	no	NA	NA	NA	NA
GCA_013790405.1_ASM1379040v1	CP056818.1	84644	GCA_013790405.1_ASM1379040v1_bin_7	1106	3113	HyAsP	66652	0.787439156939653	0.013	1106	0.355	0.025	0	0	no	0	0	no	no	NA	NA	NA	NA
GCA_013790405.1_ASM1379040v1	CP056818.1	84644	GCA_013790405.1_ASM1379040v1_bin_6	57933	65380	HyAsP	66652	0.787439156939653	0.684	57933	0.886	0.772	0	0	no	0	0	no	no	NA	NA	NA	NA
GCA_013790405.1_ASM1379040v1	CP056818.1	84644	GCA_013790405.1_ASM1379040v1_bin_1	2980	2980	HyAsP	66652	0.787439156939653	0.035	2980	1	0.068	0	0	no	0	0	no	no	NA	NA	NA	NA
GCA_013790405.1_ASM1379040v1	CP056818.1	84644	GCA_013790405.1_ASM1379040v1_bin_8	1402	3175	HyAsP	66652	0.787439156939653	0.017	1402	0.442	0.033	0	0	no	0	0	no	no	NA	NA	NA	NA
GCA_013790405.1_ASM1379040v1	CP056819.1	77307	GCA_013790405.1_ASM1379040v1_bin_16	5268	5548	HyAsP	68724	0.888975125150374	0.068	5268	0.95	0.127	0	0	no	1	0	yes	no	NA	NA	NA	NA
GCA_013790405.1_ASM1379040v1	CP056819.1	77307	GCA_013790405.1_ASM1379040v1_bin_11	35521	36132	HyAsP	68724	0.888975125150374	0.459	35521	0.983	0.626	0	0	no	1	0	yes	no	NA	NA	NA	NA
GCA_013790405.1_ASM1379040v1	CP056819.1	77307	GCA_013790405.1_ASM1379040v1_bin_7	1106	3113	HyAsP	68724	0.888975125150374	0.014	1106	0.355	0.027	0	0	no	1	0	yes	no	NA	NA	NA	NA
GCA_013790405.1_ASM1379040v1	CP056819.1	77307	GCA_013790405.1_ASM1379040v1_bin_20	1339	118909	HyAsP	68724	0.888975125150374	0.017	1339	0.011	0.013	114674	0.96438452934597	no	1	0	yes	no	NA	NA	NA	NA
GCA_013790405.1_ASM1379040v1	CP056819.1	77307	GCA_013790405.1_ASM1379040v1_bin_9	1976	2944	HyAsP	68724	0.888975125150374	0.026	1976	0.671	0.05	0	0	no	1	0	yes	no	NA	NA	NA	NA
GCA_013790405.1_ASM1379040v1	CP056819.1	77307	GCA_013790405.1_ASM1379040v1_bin_14	5024	5024	HyAsP	68724	0.888975125150374	0.065	5024	1	0.122	0	0	no	1	0	yes	no	NA	NA	NA	NA
GCA_013790405.1_ASM1379040v1	CP056819.1	77307	GCA_013790405.1_ASM1379040v1_bin_1	2979	2980	HyAsP	68724	0.888975125150374	0.039	2979	1	0.075	0	0	no	1	0	yes	no	NA	NA	NA	NA
GCA_013790405.1_ASM1379040v1	CP056819.1	77307	GCA_013790405.1_ASM1379040v1_bin_13	16936	17613	HyAsP	68724	0.888975125150374	0.219	16936	0.962	0.357	1339	0.0760233918128655	no	1	0	yes	no	1	1	1	1
GCA_013790405.1_ASM1379040v1	CP056820.1	36067	GCA_013790405.1_ASM1379040v1_bin_4	36067	36144	HyAsP	36067	1	1	36067	0.998	0.999	0	0	yes	0	0	no	no	NA	NA	NA	NA
GCA_013791815.1_ASM1379181v1	CP056847.1	151959	GCA_013791815.1_ASM1379181v1_bin_2	18586	18586	HyAsP	146502	0.964088997690166	0.122	18586	1	0.217	0	0	no	9	0	yes	no	NA	NA	NA	NA
GCA_013791815.1_ASM1379181v1	CP056847.1	151959	GCA_013791815.1_ASM1379181v1_bin_8	1240	1240	HyAsP	146502	0.964088997690166	0.008	1240	1	0.016	0	0	no	9	0	yes	no	NA	NA	NA	NA
GCA_013791815.1_ASM1379181v1	CP056847.1	151959	GCA_013791815.1_ASM1379181v1_bin_5	40338	40693	HyAsP	146502	0.964088997690166	0.265	40338	0.991	0.418	0	0	no	9	0	yes	no	NA	NA	NA	NA
GCA_013791815.1_ASM1379181v1	CP056847.1	151959	GCA_013791815.1_ASM1379181v1_bin_4	5582	7203	HyAsP	146502	0.964088997690166	0.037	5582	0.775	0.071	0	0	no	9	0	yes	no	NA	NA	NA	NA
GCA_013791815.1_ASM1379181v1	CP056847.1	151959	GCA_013791815.1_ASM1379181v1_bin_3	4951	4951	HyAsP	146502	0.964088997690166	0.033	4951	1	0.064	0	0	no	9	0	yes	no	NA	NA	NA	NA
GCA_013791815.1_ASM1379181v1	CP056847.1	151959	GCA_013791815.1_ASM1379181v1_bin_7	70869	70869	HyAsP	146502	0.964088997690166	0.466	70869	1	0.636	0	0	no	9	0	yes	no	9	9	9	1
GCA_013791815.1_ASM1379181v1	CP056848.1	4263	not_detected	0	not_applicable	HyAsP	4263	1	NA	0	NA	NA	not_applicable	not_applicable	no	0	0	no	no	NA	NA	NA	NA
GCA_013791815.1_ASM1379181v1	CP056849.1	4195	not_detected	0	not_applicable	HyAsP	3871	0.922765196662694	NA	0	NA	NA	not_applicable	not_applicable	no	0	0	no	no	NA	NA	NA	NA
GCA_013791985.1_ASM1379198v1	CP056843.1	111550	GCA_013791985.1_ASM1379198v1_bin_4	3773	3773	HyAsP	93190	0.835410129986553	0.034	3773	1	0.066	0	0	no	10	0	yes	no	1	1	10	0.1
GCA_013791985.1_ASM1379198v1	CP056843.1	111550	GCA_013791985.1_ASM1379198v1_bin_5	6866	6866	HyAsP	93190	0.835410129986553	0.062	6866	1	0.117	0	0	no	10	0	yes	no	NA	NA	NA	NA
GCA_013791985.1_ASM1379198v1	CP056843.1	111550	GCA_013791985.1_ASM1379198v1_bin_9	18737	15457	HyAsP	93190	0.835410129986553	0.168	13732	0.888	0.283	0	0	no	10	0	yes	no	3	3	10	0.3
GCA_013791985.1_ASM1379198v1	CP056843.1	111550	GCA_013791985.1_ASM1379198v1_bin_3	3727	4321	HyAsP	93190	0.835410129986553	0.033	3727	0.863	0.064	0	0	no	10	0	yes	no	NA	NA	NA	NA
GCA_013791985.1_ASM1379198v1	CP056843.1	111550	GCA_013791985.1_ASM1379198v1_bin_7	49569	85055	HyAsP	93190	0.835410129986553	0.444	47783	0.562	0.496	24910	0.292869319851861	no	10	0	yes	no	NA	NA	NA	NA
GCA_013791985.1_ASM1379198v1	CP056843.1	111550	GCA_013791985.1_ASM1379198v1_bin_17	7750	5387	HyAsP	93190	0.835410129986553	0.069	3875	0.719	0.126	0	0	no	10	0	yes	no	1	1	10	0.1
GCA_013791985.1_ASM1379198v1	CP056843.1	111550	GCA_013791985.1_ASM1379198v1_bin_16	3225	5372	HyAsP	93190	0.835410129986553	0.029	3225	0.6	0.055	0	0	no	10	0	yes	no	2	2	10	0.2
GCA_013791985.1_ASM1379198v1	CP056843.1	111550	GCA_013791985.1_ASM1379198v1_bin_8	20059	20843	HyAsP	93190	0.835410129986553	0.18	15825	0.759	0.291	4823	0.231396631962769	no	10	0	yes	no	NA	NA	NA	NA
GCA_013791985.1_ASM1379198v1	CP056843.1	111550	GCA_013791985.1_ASM1379198v1_bin_2	8314	5608	HyAsP	93190	0.835410129986553	0.075	4080	0.728	0.136	1786	0.318473609129815	no	10	0	yes	no	NA	NA	NA	NA
GCA_013791985.1_ASM1379198v1	CP056843.1	111550	GCA_013791985.1_ASM1379198v1_bin_14	2260	1564	HyAsP	93190	0.835410129986553	0.02	1130	0.723	0.039	0	0	no	10	0	yes	no	1	1	10	0.1
GCA_013791985.1_ASM1379198v1	CP056844.1	87144	GCA_013791985.1_ASM1379198v1_bin_11	73602	82100	HyAsP	78279	0.898271825943266	0.845	73602	0.896	0.87	0	0	no	0	0	no	no	NA	NA	NA	NA
GCA_013791985.1_ASM1379198v1	CP056844.1	87144	GCA_013791985.1_ASM1379198v1_bin_7	3423	85055	HyAsP	78279	0.898271825943266	0.039	3423	0.04	0.039	24910	0.292869319851861	no	0	0	no	no	NA	NA	NA	NA
GCA_013791985.1_ASM1379198v1	CP056845.1	46419	GCA_013791985.1_ASM1379198v1_bin_6	19576	20181	HyAsP	45874	0.988259118033564	0.422	19576	0.97	0.588	0	0	no	0	0	no	no	NA	NA	NA	NA
GCA_013791985.1_ASM1379198v1	CP056845.1	46419	GCA_013791985.1_ASM1379198v1_bin_10	26373	27082	HyAsP	45874	0.988259118033564	0.568	26373	0.974	0.718	0	0	no	0	0	no	no	NA	NA	NA	NA
GCA_013795065.1_ASM1379506v1	CP056866.1	44310	GCA_013795065.1_ASM1379506v1_bin_2	2249	2249	HyAsP	42971	0.969781087790566	0.051	2249	1	0.097	0	0	no	2	1	yes	yes	1	1	2	0.5
GCA_013795065.1_ASM1379506v1	CP056866.1	44310	GCA_013795065.1_ASM1379506v1_bin_1	40722	41030	HyAsP	42971	0.969781087790566	0.919	40722	0.992	0.954	0	0	yes	2	1	yes	yes	1	1	2	0.5
GCA_013795285.1_ASM1379528v1	CP056868.1	151919	GCA_013795285.1_ASM1379528v1_bin_7	16523	18304	HyAsP	136675	0.899657054088034	0.109	16523	0.903	0.195	0	0	no	0	0	no	no	NA	NA	NA	NA
GCA_013795285.1_ASM1379528v1	CP056868.1	151919	GCA_013795285.1_ASM1379528v1_bin_6	1259	45196	HyAsP	136675	0.899657054088034	0.008	1259	0.028	0.012	42771	0.946344809275157	no	0	0	no	no	NA	NA	NA	NA
GCA_013795285.1_ASM1379528v1	CP056868.1	151919	GCA_013795285.1_ASM1379528v1_bin_5	114517	120997	HyAsP	136675	0.899657054088034	0.754	114517	0.946	0.839	1259	0.0104052166582643	no	0	0	no	no	NA	NA	NA	NA
GCA_013795285.1_ASM1379528v1	CP056868.1	151919	GCA_013795285.1_ASM1379528v1_bin_8	2028	4262	HyAsP	136675	0.899657054088034	0.013	2028	0.476	0.025	0	0	no	0	0	no	no	NA	NA	NA	NA
GCA_013795285.1_ASM1379528v1	CP056869.1	2181	not_detected	0	not_applicable	HyAsP	2113	0.968821641448877	NA	0	NA	NA	not_applicable	not_applicable	no	0	0	no	no	NA	NA	NA	NA
GCA_013795545.1_ASM1379554v1	CP056871.1	92934	GCA_013795545.1_ASM1379554v1_bin_6	2395	5232	HyAsP	55695	0.599296274775647	0.026	2395	0.458	0.049	0	0	no	4	0	yes	no	NA	NA	NA	NA
GCA_013795545.1_ASM1379554v1	CP056871.1	92934	GCA_013795545.1_ASM1379554v1_bin_12	1414	42263	HyAsP	55695	0.599296274775647	0.015	1414	0.033	0.021	39964	0.945602536497646	no	4	0	yes	no	NA	NA	NA	NA
GCA_013795545.1_ASM1379554v1	CP056871.1	92934	GCA_013795545.1_ASM1379554v1_bin_19	3137	5148	HyAsP	55695	0.599296274775647	0.034	3137	0.609	0.064	0	0	no	4	0	yes	no	NA	NA	NA	NA
GCA_013795545.1_ASM1379554v1	CP056871.1	92934	GCA_013795545.1_ASM1379554v1_bin_2	1443	1443	HyAsP	55695	0.599296274775647	0.016	1443	1	0.031	1443	1	no	4	0	yes	no	NA	NA	NA	NA
GCA_013795545.1_ASM1379554v1	CP056871.1	92934	GCA_013795545.1_ASM1379554v1_bin_13	17672	19377	HyAsP	55695	0.599296274775647	0.19	17672	0.912	0.314	0	0	no	4	0	yes	no	NA	NA	NA	NA
GCA_013795545.1_ASM1379554v1	CP056871.1	92934	GCA_013795545.1_ASM1379554v1_bin_4	10703	13210	HyAsP	55695	0.599296274775647	0.115	10703	0.81	0.201	0	0	no	4	0	yes	no	4	4	4	1
GCA_013795545.1_ASM1379554v1	CP056871.1	92934	GCA_013795545.1_ASM1379554v1_bin_3	1414	2738	HyAsP	55695	0.599296274775647	0.015	1414	0.516	0.029	0	0	no	4	0	yes	no	NA	NA	NA	NA
GCA_013795545.1_ASM1379554v1	CP056871.1	92934	GCA_013795545.1_ASM1379554v1_bin_15	1215	3340	HyAsP	55695	0.599296274775647	0.013	1215	0.364	0.025	0	0	no	4	0	yes	no	NA	NA	NA	NA
GCA_013795545.1_ASM1379554v1	CP056871.1	92934	GCA_013795545.1_ASM1379554v1_bin_8	7035	52996	HyAsP	55695	0.599296274775647	0.076	2345	0.044	0.056	2345	0.04424862253755	no	4	0	yes	no	NA	NA	NA	NA
GCA_013795545.1_ASM1379554v1	CP056871.1	92934	GCA_013795545.1_ASM1379554v1_bin_17	6610	14478	HyAsP	55695	0.599296274775647	0.071	6610	0.457	0.123	5701	0.393769857715154	no	4	0	yes	no	NA	NA	NA	NA
GCA_013795545.1_ASM1379554v1	CP056872.1	72712	GCA_013795545.1_ASM1379554v1_bin_12	1414	42263	HyAsP	43170	0.593712179557707	0.019	1414	0.033	0.024	39964	0.945602536497646	no	0	0	no	no	NA	NA	NA	NA
GCA_013795545.1_ASM1379554v1	CP056872.1	72712	GCA_013795545.1_ASM1379554v1_bin_7	2209	5046	HyAsP	43170	0.593712179557707	0.03	2209	0.438	0.056	0	0	no	0	0	no	no	NA	NA	NA	NA
GCA_013795545.1_ASM1379554v1	CP056872.1	72712	GCA_013795545.1_ASM1379554v1_bin_10	1216	1216	HyAsP	43170	0.593712179557707	0.017	1216	1	0.033	0	0	no	0	0	no	no	NA	NA	NA	NA
GCA_013795545.1_ASM1379554v1	CP056872.1	72712	GCA_013795545.1_ASM1379554v1_bin_3	1414	2738	HyAsP	43170	0.593712179557707	0.019	1414	0.516	0.037	0	0	no	0	0	no	no	NA	NA	NA	NA
GCA_013795545.1_ASM1379554v1	CP056872.1	72712	GCA_013795545.1_ASM1379554v1_bin_8	35730	52996	HyAsP	43170	0.593712179557707	0.491	35730	0.674	0.568	2345	0.04424862253755	no	0	0	no	no	NA	NA	NA	NA
GCA_013795795.1_ASM1379579v1	CP056874.1	92934	GCA_013795795.1_ASM1379579v1_bin_5	7062	4565	HyAsP	55938	0.601911033636774	0.076	2354	0.516	0.132	0	0	no	4	0	yes	no	NA	NA	NA	NA
GCA_013795795.1_ASM1379579v1	CP056874.1	92934	GCA_013795795.1_ASM1379579v1_bin_6	2395	5232	HyAsP	55938	0.601911033636774	0.026	2395	0.458	0.049	0	0	no	4	0	yes	no	NA	NA	NA	NA
GCA_013795795.1_ASM1379579v1	CP056874.1	92934	GCA_013795795.1_ASM1379579v1_bin_12	11915	57288	HyAsP	55938	0.601911033636774	0.128	7207	0.126	0.127	1994	0.0348065912582042	no	4	0	yes	no	NA	NA	NA	NA
GCA_013795795.1_ASM1379579v1	CP056874.1	92934	GCA_013795795.1_ASM1379579v1_bin_3	10703	10703	HyAsP	55938	0.601911033636774	0.115	10703	1	0.206	0	0	no	4	0	yes	no	4	4	4	1
GCA_013795795.1_ASM1379579v1	CP056874.1	92934	GCA_013795795.1_ASM1379579v1_bin_2	1443	1443	HyAsP	55938	0.601911033636774	0.016	1443	1	0.031	1443	1	no	4	0	yes	no	NA	NA	NA	NA
GCA_013795795.1_ASM1379579v1	CP056874.1	92934	GCA_013795795.1_ASM1379579v1_bin_10	1414	7688	HyAsP	55938	0.601911033636774	0.015	1414	0.184	0.028	4715	0.613293444328824	no	4	0	yes	no	NA	NA	NA	NA
GCA_013795795.1_ASM1379579v1	CP056874.1	92934	GCA_013795795.1_ASM1379579v1_bin_17	6610	13062	HyAsP	55938	0.601911033636774	0.071	6610	0.506	0.125	4283	0.32789771857296	no	4	0	yes	no	NA	NA	NA	NA
GCA_013795795.1_ASM1379579v1	CP056874.1	92934	GCA_013795795.1_ASM1379579v1_bin_16	4654	6198	HyAsP	55938	0.601911033636774	0.05	4654	0.751	0.094	0	0	no	4	0	yes	no	NA	NA	NA	NA
GCA_013795795.1_ASM1379579v1	CP056874.1	92934	GCA_013795795.1_ASM1379579v1_bin_14	14449	15591	HyAsP	55938	0.601911033636774	0.155	14449	0.927	0.266	0	0	no	4	0	yes	no	NA	NA	NA	NA
GCA_013795795.1_ASM1379579v1	CP056875.1	75466	GCA_013795795.1_ASM1379579v1_bin_5	2354	4565	HyAsP	46541	0.616714811968304	0.031	2354	0.516	0.058	0	0	no	0	0	no	no	NA	NA	NA	NA
GCA_013795795.1_ASM1379579v1	CP056875.1	75466	GCA_013795795.1_ASM1379579v1_bin_12	38465	57288	HyAsP	46541	0.616714811968304	0.51	38465	0.671	0.58	1994	0.0348065912582042	no	0	0	no	no	NA	NA	NA	NA
GCA_013795795.1_ASM1379579v1	CP056875.1	75466	GCA_013795795.1_ASM1379579v1_bin_4	2209	3591	HyAsP	46541	0.616714811968304	0.029	2209	0.615	0.055	0	0	no	0	0	no	no	NA	NA	NA	NA
GCA_013795795.1_ASM1379579v1	CP056875.1	75466	GCA_013795795.1_ASM1379579v1_bin_8	2092	3019	HyAsP	46541	0.616714811968304	0.028	2092	0.693	0.054	0	0	no	0	0	no	no	NA	NA	NA	NA
GCA_013795795.1_ASM1379579v1	CP056875.1	75466	GCA_013795795.1_ASM1379579v1_bin_10	1414	7688	HyAsP	46541	0.616714811968304	0.019	1414	0.184	0.034	4715	0.613293444328824	no	0	0	no	no	NA	NA	NA	NA
GCA_013795795.1_ASM1379579v1	CP056875.1	75466	GCA_013795795.1_ASM1379579v1_bin_7	1216	1216	HyAsP	46541	0.616714811968304	0.016	1216	1	0.031	0	0	no	0	0	no	no	NA	NA	NA	NA
GCA_013795795.1_ASM1379579v1	CP056875.1	75466	GCA_013795795.1_ASM1379579v1_bin_16	3439	6198	HyAsP	46541	0.616714811968304	0.046	3439	0.555	0.085	0	0	no	0	0	no	no	NA	NA	NA	NA
GCA_013796065.1_ASM1379606v1	CP056877.1	157437	GCA_013796065.1_ASM1379606v1_bin_2	30803	42692	HyAsP	139764	0.887745574420244	0.196	30803	0.722	0.308	8823	0.206666354352103	no	5	0	yes	no	1	1	5	0.2
GCA_013796065.1_ASM1379606v1	CP056877.1	157437	GCA_013796065.1_ASM1379606v1_bin_4	3267	6124	HyAsP	139764	0.887745574420244	0.021	3267	0.533	0.04	1006	0.164271717831483	no	5	0	yes	no	NA	NA	NA	NA
GCA_013796065.1_ASM1379606v1	CP056877.1	157437	GCA_013796065.1_ASM1379606v1_bin_17	9438	19786	HyAsP	139764	0.887745574420244	0.06	7313	0.37	0.103	14194	0.717375922369352	no	5	0	yes	no	NA	NA	NA	NA
GCA_013796065.1_ASM1379606v1	CP056877.1	157437	GCA_013796065.1_ASM1379606v1_bin_14	17605	19189	HyAsP	139764	0.887745574420244	0.112	17605	0.917	0.2	0	0	no	5	0	yes	no	NA	NA	NA	NA
GCA_013796065.1_ASM1379606v1	CP056877.1	157437	GCA_013796065.1_ASM1379606v1_bin_11	4644	4644	HyAsP	139764	0.887745574420244	0.029	4644	1	0.056	0	0	no	5	0	yes	no	NA	NA	NA	NA
GCA_013796065.1_ASM1379606v1	CP056877.1	157437	GCA_013796065.1_ASM1379606v1_bin_3	22046	22046	HyAsP	139764	0.887745574420244	0.14	22046	1	0.246	0	0	no	5	0	yes	no	3	3	5	0.6
GCA_013796065.1_ASM1379606v1	CP056877.1	157437	GCA_013796065.1_ASM1379606v1_bin_8	6871	7845	HyAsP	139764	0.887745574420244	0.044	6871	0.876	0.084	2582	0.32912683237731	no	5	0	yes	no	NA	NA	NA	NA
GCA_013796065.1_ASM1379606v1	CP056877.1	157437	GCA_013796065.1_ASM1379606v1_bin_10	10846	10943	HyAsP	139764	0.887745574420244	0.069	10846	0.991	0.129	0	0	no	5	0	yes	no	NA	NA	NA	NA
GCA_013796065.1_ASM1379606v1	CP056877.1	157437	GCA_013796065.1_ASM1379606v1_bin_12	19358	19358	HyAsP	139764	0.887745574420244	0.123	19358	1	0.219	0	0	no	5	0	yes	no	NA	NA	NA	NA
GCA_013796065.1_ASM1379606v1	CP056877.1	157437	GCA_013796065.1_ASM1379606v1_bin_13	2582	4636	HyAsP	139764	0.887745574420244	0.016	2582	0.557	0.031	4559	0.983390854184642	no	5	0	yes	no	NA	NA	NA	NA
GCA_013796065.1_ASM1379606v1	CP056877.1	157437	GCA_013796065.1_ASM1379606v1_bin_6	9026	11452	HyAsP	139764	0.887745574420244	0.057	9026	0.788	0.106	0	0	no	5	0	yes	no	1	1	5	0.2
GCA_013797045.1_ASM1379704v1	CP056895.1	98203	GCA_013797045.1_ASM1379704v1_bin_4	93374	93796	HyAsP	97969	0.997617180737859	0.951	93374	0.996	0.973	0	0	yes	0	0	no	no	NA	NA	NA	NA
GCA_013797825.1_ASM1379782v1	CP056903.1	143282	GCA_013797825.1_ASM1379782v1_bin_5	7522	4998	HyAsP	107239	0.748447118270264	0.052	3761	0.753	0.097	0	0	no	0	0	no	no	NA	NA	NA	NA
GCA_013797825.1_ASM1379782v1	CP056903.1	143282	GCA_013797825.1_ASM1379782v1_bin_6	60050	174316	HyAsP	107239	0.748447118270264	0.419	58830	0.337	0.374	80985	0.464587301223066	no	0	0	no	no	NA	NA	NA	NA
GCA_013797825.1_ASM1379782v1	CP056903.1	143282	GCA_013797825.1_ASM1379782v1_bin_4	24214	173025	HyAsP	107239	0.748447118270264	0.169	20560	0.119	0.14	75417	0.435873428695275	no	0	0	no	no	NA	NA	NA	NA
GCA_013797825.1_ASM1379782v1	CP056903.1	143282	GCA_013797825.1_ASM1379782v1_bin_3	8905	16392	HyAsP	107239	0.748447118270264	0.062	8905	0.543	0.111	1449	0.0883967789165447	no	0	0	no	no	NA	NA	NA	NA
GCA_013797825.1_ASM1379782v1	CP056904.1	97730	GCA_013797825.1_ASM1379782v1_bin_6	16033	174316	HyAsP	86062	0.880609843446229	0.164	16033	0.092	0.118	80985	0.464587301223066	no	0	0	no	no	NA	NA	NA	NA
GCA_013797825.1_ASM1379782v1	CP056904.1	97730	GCA_013797825.1_ASM1379782v1_bin_4	64178	173025	HyAsP	86062	0.880609843446229	0.657	64178	0.371	0.474	75417	0.435873428695275	no	0	0	no	no	NA	NA	NA	NA
GCA_013797825.1_ASM1379782v1	CP056905.1	4072	GCA_013797825.1_ASM1379782v1_bin_2	4072	4149	HyAsP	4072	1	1	4072	0.981	0.99	0	0	yes	0	0	no	no	NA	NA	NA	NA
GCA_013797825.1_ASM1379782v1	CP056906.1	1565	GCA_013797825.1_ASM1379782v1_bin_1	1565	1642	HyAsP	1565	1	1	1565	0.953	0.976	0	0	yes	0	0	no	no	NA	NA	NA	NA
GCA_013798625.1_ASM1379862v1	CP056915.1	143134	GCA_013798625.1_ASM1379862v1_bin_1	5452	5452	HyAsP	135857	0.949159528833121	0.038	5452	1	0.073	0	0	no	2	0	yes	no	NA	NA	NA	NA
GCA_013798625.1_ASM1379862v1	CP056915.1	143134	GCA_013798625.1_ASM1379862v1_bin_4	17334	17725	HyAsP	135857	0.949159528833121	0.121	17334	0.978	0.215	0	0	no	2	0	yes	no	NA	NA	NA	NA
GCA_013798625.1_ASM1379862v1	CP056915.1	143134	GCA_013798625.1_ASM1379862v1_bin_7	66231	68807	HyAsP	135857	0.949159528833121	0.463	65190	0.947	0.622	0	0	no	2	0	yes	no	2	2	2	1
GCA_013798625.1_ASM1379862v1	CP056915.1	143134	GCA_013798625.1_ASM1379862v1_bin_6	7361	10055	HyAsP	135857	0.949159528833121	0.051	7361	0.732	0.095	0	0	no	2	0	yes	no	NA	NA	NA	NA
GCA_013798625.1_ASM1379862v1	CP056915.1	143134	GCA_013798625.1_ASM1379862v1_bin_5	23920	23920	HyAsP	135857	0.949159528833121	0.167	23920	1	0.286	0	0	no	2	0	yes	no	NA	NA	NA	NA
GCA_013798625.1_ASM1379862v1	CP056915.1	143134	GCA_013798625.1_ASM1379862v1_bin_8	12424	14260	HyAsP	135857	0.949159528833121	0.087	12424	0.871	0.158	0	0	no	2	0	yes	no	NA	NA	NA	NA
GCA_013798625.1_ASM1379862v1	CP056915.1	143134	GCA_013798625.1_ASM1379862v1_bin_2	2966	2966	HyAsP	135857	0.949159528833121	0.021	2966	1	0.041	0	0	no	2	0	yes	no	NA	NA	NA	NA
GCA_013801205.1_ASM1380120v1	CP056956.1	150657	GCA_013801205.1_ASM1380120v1_bin_1	24464	25686	HyAsP	144212	0.957220706638258	0.162	24464	0.952	0.277	0	0	no	1	0	yes	no	1	1	1	1
GCA_013801205.1_ASM1380120v1	CP056956.1	150657	GCA_013801205.1_ASM1380120v1_bin_4	61294	78918	HyAsP	144212	0.957220706638258	0.407	61294	0.777	0.534	15932	0.201880432854355	no	1	0	yes	no	NA	NA	NA	NA
GCA_013801205.1_ASM1380120v1	CP056956.1	150657	GCA_013801205.1_ASM1380120v1_bin_5	1250	1250	HyAsP	144212	0.957220706638258	0.008	1250	1	0.016	1250	1	no	1	0	yes	no	NA	NA	NA	NA
GCA_013801205.1_ASM1380120v1	CP056956.1	150657	GCA_013801205.1_ASM1380120v1_bin_6	1332	1332	HyAsP	144212	0.957220706638258	0.009	1332	1	0.018	1332	1	no	1	0	yes	no	NA	NA	NA	NA
GCA_013801205.1_ASM1380120v1	CP056956.1	150657	GCA_013801205.1_ASM1380120v1_bin_7	55946	79717	HyAsP	144212	0.957220706638258	0.371	55946	0.702	0.485	19498	0.244590237966808	no	1	0	yes	no	NA	NA	NA	NA
GCA_013801205.1_ASM1380120v1	CP056957.1	7941	GCA_013801205.1_ASM1380120v1_bin_2	5427	14680	HyAsP	5427	0.683415187004156	0.683	5427	0.37	0.48	1056	0.0719346049046321	no	0	0	no	no	NA	NA	NA	NA
GCA_013801205.1_ASM1380120v1	CP056958.1	6715	not_detected	0	not_applicable	HyAsP	4590	0.683544303797468	NA	0	NA	NA	not_applicable	not_applicable	no	0	0	no	no	NA	NA	NA	NA
GCA_013801205.1_ASM1380120v1	CP056959.1	4593	GCA_013801205.1_ASM1380120v1_bin_2	4021	14680	HyAsP	4021	0.875462660570433	0.875	4021	0.274	0.417	1056	0.0719346049046321	no	0	0	no	no	NA	NA	NA	NA
GCA_013801205.1_ASM1380120v1	CP056960.1	4073	GCA_013801205.1_ASM1380120v1_bin_3	3893	4017	HyAsP	3893	0.955806530812669	0.956	3893	0.969	0.962	0	0	yes	0	0	no	no	NA	NA	NA	NA
GCA_013802065.1_ASM1380206v1	CP056983.1	1565	not_detected	0	not_applicable	HyAsP	0	0	NA	0	NA	NA	not_applicable	not_applicable	no	0	0	no	no	NA	NA	NA	NA
GCA_013802065.1_ASM1380206v1	CP056984.1	1552	not_detected	0	not_applicable	HyAsP	0	0	NA	0	NA	NA	not_applicable	not_applicable	no	0	0	no	no	NA	NA	NA	NA
GCA_013802065.1_ASM1380206v1	CP056975.1	94957	GCA_013802065.1_ASM1380206v1_bin_12	1443	46135	HyAsP	51162	0.538791242351801	0.015	1443	0.031	0.02	38332	0.830865936924244	no	0	0	no	no	NA	NA	NA	NA
GCA_013802065.1_ASM1380206v1	CP056975.1	94957	GCA_013802065.1_ASM1380206v1_bin_9	13493	142975	HyAsP	51162	0.538791242351801	0.142	13493	0.094	0.113	25639	0.179325056828117	no	0	0	no	no	NA	NA	NA	NA
GCA_013802065.1_ASM1380206v1	CP056975.1	94957	GCA_013802065.1_ASM1380206v1_bin_8	1871	14944	HyAsP	51162	0.538791242351801	0.02	1871	0.125	0.034	10760	0.720021413276231	no	0	0	no	no	NA	NA	NA	NA
GCA_013802065.1_ASM1380206v1	CP056975.1	94957	GCA_013802065.1_ASM1380206v1_bin_11	3590	49437	HyAsP	51162	0.538791242351801	0.038	1795	0.036	0.037	1789	0.0361874709225883	no	0	0	no	no	NA	NA	NA	NA
GCA_013802065.1_ASM1380206v1	CP056975.1	94957	GCA_013802065.1_ASM1380206v1_bin_10	3590	17185	HyAsP	51162	0.538791242351801	0.038	1795	0.104	0.056	2794	0.162583648530695	no	0	0	no	no	NA	NA	NA	NA
GCA_013802065.1_ASM1380206v1	CP056976.1	90751	GCA_013802065.1_ASM1380206v1_bin_9	73103	142975	HyAsP	79810	0.879439345020992	0.806	73103	0.511	0.625	25639	0.179325056828117	no	0	0	no	no	NA	NA	NA	NA
GCA_013802065.1_ASM1380206v1	CP056976.1	90751	GCA_013802065.1_ASM1380206v1_bin_7	4912	21489	HyAsP	79810	0.879439345020992	0.054	4912	0.229	0.087	0	0	no	0	0	no	no	NA	NA	NA	NA
GCA_013802065.1_ASM1380206v1	CP056976.1	90751	GCA_013802065.1_ASM1380206v1_bin_11	1795	49437	HyAsP	79810	0.879439345020992	0.02	1795	0.036	0.026	1789	0.0361874709225883	no	0	0	no	no	NA	NA	NA	NA
GCA_013802065.1_ASM1380206v1	CP056976.1	90751	GCA_013802065.1_ASM1380206v1_bin_10	1795	17185	HyAsP	79810	0.879439345020992	0.02	1795	0.104	0.034	2794	0.162583648530695	no	0	0	no	no	NA	NA	NA	NA
GCA_013802065.1_ASM1380206v1	CP056977.1	89222	GCA_013802065.1_ASM1380206v1_bin_12	2772	46135	HyAsP	48396	0.54242227253368	0.031	2772	0.06	0.041	38332	0.830865936924244	no	4	0	yes	no	NA	NA	NA	NA
GCA_013802065.1_ASM1380206v1	CP056977.1	89222	GCA_013802065.1_ASM1380206v1_bin_9	8926	142975	HyAsP	48396	0.54242227253368	0.1	8926	0.062	0.077	25639	0.179325056828117	no	4	0	yes	no	NA	NA	NA	NA
GCA_013802065.1_ASM1380206v1	CP056977.1	89222	GCA_013802065.1_ASM1380206v1_bin_7	5385	21489	HyAsP	48396	0.54242227253368	0.06	5385	0.251	0.097	0	0	no	4	0	yes	no	NA	NA	NA	NA
GCA_013802065.1_ASM1380206v1	CP056977.1	89222	GCA_013802065.1_ASM1380206v1_bin_13	1197	1197	HyAsP	48396	0.54242227253368	0.013	1197	1	0.026	0	0	no	4	0	yes	no	NA	NA	NA	NA
GCA_013802065.1_ASM1380206v1	CP056977.1	89222	GCA_013802065.1_ASM1380206v1_bin_11	3590	49437	HyAsP	48396	0.54242227253368	0.04	1795	0.036	0.038	1789	0.0361874709225883	no	4	0	yes	no	NA	NA	NA	NA
GCA_013802065.1_ASM1380206v1	CP056977.1	89222	GCA_013802065.1_ASM1380206v1_bin_3	12665	14796	HyAsP	48396	0.54242227253368	0.142	12665	0.856	0.244	0	0	no	4	0	yes	no	NA	NA	NA	NA
GCA_013802065.1_ASM1380206v1	CP056977.1	89222	GCA_013802065.1_ASM1380206v1_bin_10	14437	17185	HyAsP	48396	0.54242227253368	0.162	12642	0.736	0.266	2794	0.162583648530695	no	4	0	yes	no	4	4	4	1
GCA_013802065.1_ASM1380206v1	CP056977.1	89222	GCA_013802065.1_ASM1380206v1_bin_5	2201	2201	HyAsP	48396	0.54242227253368	0.025	2201	1	0.049	0	0	no	4	0	yes	no	NA	NA	NA	NA
GCA_013802065.1_ASM1380206v1	CP056978.1	51984	GCA_013802065.1_ASM1380206v1_bin_12	5671	46135	HyAsP	49021	0.943001692828563	0.109	5671	0.123	0.116	38332	0.830865936924244	no	5	0	yes	no	NA	NA	NA	NA
GCA_013802065.1_ASM1380206v1	CP056978.1	51984	GCA_013802065.1_ASM1380206v1_bin_11	42358	49437	HyAsP	49021	0.943001692828563	0.815	42358	0.857	0.835	1789	0.0361874709225883	no	5	0	yes	no	5	5	5	1
GCA_013802065.1_ASM1380206v1	CP056979.1	4072	GCA_013802065.1_ASM1380206v1_bin_2	4072	4149	HyAsP	4072	1	1	4072	0.981	0.99	0	0	yes	0	0	no	no	NA	NA	NA	NA
GCA_013802065.1_ASM1380206v1	CP056980.1	4018	GCA_013802065.1_ASM1380206v1_bin_4	3902	3902	HyAsP	3902	0.971129915380786	0.971	3902	1	0.985	0	0	yes	0	0	no	no	NA	NA	NA	NA
GCA_013802065.1_ASM1380206v1	CP056981.1	3751	GCA_013802065.1_ASM1380206v1_bin_1	3751	3828	HyAsP	3751	1	1	3751	0.98	0.99	0	0	yes	0	0	no	no	NA	NA	NA	NA
GCA_013802065.1_ASM1380206v1	CP056982.1	2601	not_detected	0	not_applicable	HyAsP	2485	0.955401768550557	NA	0	NA	NA	not_applicable	not_applicable	no	0	0	no	no	NA	NA	NA	NA
GCA_013802585.1_ASM1380258v1	CP056998.1	50161	GCA_013802585.1_ASM1380258v1_bin_11	10889	14880	HyAsP	43784	0.872869360658679	0.217	10889	0.732	0.335	0	0	no	1	0	yes	no	NA	NA	NA	NA
GCA_013802585.1_ASM1380258v1	CP056998.1	50161	GCA_013802585.1_ASM1380258v1_bin_18	3837	6083	HyAsP	43784	0.872869360658679	0.076	2766	0.455	0.13	2599	0.427256288015782	no	1	0	yes	no	NA	NA	NA	NA
GCA_013802585.1_ASM1380258v1	CP056998.1	50161	GCA_013802585.1_ASM1380258v1_bin_16	1013	6806	HyAsP	43784	0.872869360658679	0.02	1013	0.149	0.035	5419	0.796209227152513	no	1	0	yes	no	NA	NA	NA	NA
GCA_013802585.1_ASM1380258v1	CP056998.1	50161	GCA_013802585.1_ASM1380258v1_bin_5	1510	6278	HyAsP	43784	0.872869360658679	0.03	1510	0.241	0.053	0	0	no	1	0	yes	no	NA	NA	NA	NA
GCA_013802585.1_ASM1380258v1	CP056998.1	50161	GCA_013802585.1_ASM1380258v1_bin_3	6803	23873	HyAsP	43784	0.872869360658679	0.136	5252	0.22	0.168	0	0	no	1	0	yes	no	1	6	1	1
GCA_013802585.1_ASM1380258v1	CP056998.1	50161	GCA_013802585.1_ASM1380258v1_bin_17	2142	4454	HyAsP	43784	0.872869360658679	0.043	1071	0.24	0.073	1071	0.240458015267176	no	1	0	yes	no	NA	NA	NA	NA
GCA_013802585.1_ASM1380258v1	CP056998.1	50161	GCA_013802585.1_ASM1380258v1_bin_8	6026	107683	HyAsP	43784	0.872869360658679	0.12	6026	0.056	0.076	98823	0.917721460211918	no	1	0	yes	no	NA	NA	NA	NA
GCA_013802585.1_ASM1380258v1	CP056999.1	44007	GCA_013802585.1_ASM1380258v1_bin_5	3509	6278	HyAsP	36542	0.830367896016543	0.08	3509	0.559	0.14	0	0	no	7	1	yes	yes	NA	NA	NA	NA
GCA_013802585.1_ASM1380258v1	CP056999.1	44007	GCA_013802585.1_ASM1380258v1_bin_7	1506	1506	HyAsP	36542	0.830367896016543	0.034	1506	1	0.066	0	0	no	7	1	yes	yes	NA	NA	NA	NA
GCA_013802585.1_ASM1380258v1	CP056999.1	44007	GCA_013802585.1_ASM1380258v1_bin_3	15752	23873	HyAsP	36542	0.830367896016543	0.358	15752	0.66	0.464	0	0	no	7	1	yes	yes	5	6	7	0.714285714285714
GCA_013802585.1_ASM1380258v1	CP056999.1	44007	GCA_013802585.1_ASM1380258v1_bin_6	1117	1937	HyAsP	36542	0.830367896016543	0.025	1117	0.577	0.048	0	0	no	7	1	yes	yes	1	1	7	0.142857142857143
GCA_013802585.1_ASM1380258v1	CP056999.1	44007	GCA_013802585.1_ASM1380258v1_bin_2	7252	7252	HyAsP	36542	0.830367896016543	0.165	7252	1	0.283	0	0	no	7	1	yes	yes	NA	NA	NA	NA
GCA_013802585.1_ASM1380258v1	CP057000.1	8136	GCA_013802585.1_ASM1380258v1_bin_4	7539	7918	HyAsP	7539	0.926622418879056	0.927	7539	0.952	0.939	0	0	no	0	0	no	no	NA	NA	NA	NA
GCA_013802585.1_ASM1380258v1	CP057001.1	2460	GCA_013802585.1_ASM1380258v1_bin_1	2460	2537	HyAsP	2460	1	1	2460	0.97	0.985	0	0	yes	0	0	no	no	NA	NA	NA	NA
GCA_013803745.1_ASM1380374v1	CP057013.1	89908	GCA_013803745.1_ASM1380374v1_bin_3	89220	130974	HyAsP	89220	0.992347733238422	0.992	89220	0.681	0.808	42088	0.321346221387451	no	0	0	no	no	NA	NA	NA	NA
GCA_013803905.1_ASM1380390v1	CP057017.1	89908	GCA_013803905.1_ASM1380390v1_bin_3	89220	130974	HyAsP	89220	0.992347733238422	0.992	89220	0.681	0.808	42088	0.321346221387451	no	0	0	no	no	NA	NA	NA	NA
GCA_013804065.1_ASM1380406v1	CP057015.1	89908	GCA_013804065.1_ASM1380406v1_bin_1	5334	5548	HyAsP	89220	0.992347733238422	0.059	5334	0.961	0.111	0	0	no	0	0	no	no	NA	NA	NA	NA
GCA_013804065.1_ASM1380406v1	CP057015.1	89908	GCA_013804065.1_ASM1380406v1_bin_4	83886	125426	HyAsP	89220	0.992347733238422	0.933	83886	0.669	0.779	42088	0.335560410122303	no	0	0	no	no	NA	NA	NA	NA
GCA_013804445.1_ASM1380444v1	CP057021.1	54502	GCA_013804445.1_ASM1380444v1_bin_9	54369	54369	HyAsP	54369	0.997559722578988	0.998	54369	1	0.999	0	0	yes	0	0	no	no	NA	NA	NA	NA
GCA_013804645.1_ASM1380464v1	CP057023.1	89908	GCA_013804645.1_ASM1380464v1_bin_1	5334	5548	HyAsP	89220	0.992347733238422	0.059	5334	0.961	0.111	0	0	no	0	0	no	no	NA	NA	NA	NA
GCA_013804645.1_ASM1380464v1	CP057023.1	89908	GCA_013804645.1_ASM1380464v1_bin_4	43091	44554	HyAsP	89220	0.992347733238422	0.479	43091	0.967	0.641	0	0	no	0	0	no	no	NA	NA	NA	NA
GCA_013804645.1_ASM1380464v1	CP057023.1	89908	GCA_013804645.1_ASM1380464v1_bin_5	40802	80640	HyAsP	89220	0.992347733238422	0.454	40802	0.506	0.479	42088	0.521924603174603	no	0	0	no	no	NA	NA	NA	NA
GCA_013805505.1_ASM1380550v1	CP057032.1	62375	not_detected	0	not_applicable	HyAsP	42926	0.688192384769539	NA	0	NA	NA	not_applicable	not_applicable	no	0	0	no	no	NA	NA	NA	NA
GCA_013805505.1_ASM1380550v1	CP057033.1	55483	not_detected	0	not_applicable	HyAsP	55350	0.997602869347368	NA	0	NA	NA	not_applicable	not_applicable	no	0	0	no	no	NA	NA	NA	NA
GCA_013806085.1_ASM1380608v1	CP057046.1	129449	GCA_013806085.1_ASM1380608v1_bin_5	52919	63050	HyAsP	123310	0.952575917929069	0.409	52919	0.839	0.55	8996	0.142680412371134	no	0	0	no	no	NA	NA	NA	NA
GCA_013806085.1_ASM1380608v1	CP057047.1	93415	GCA_013806085.1_ASM1380608v1_bin_6	90713	93723	HyAsP	90713	0.971075309104534	0.971	90713	0.968	0.969	0	0	yes	0	0	no	no	NA	NA	NA	NA
GCA_013806085.1_ASM1380608v1	CP057048.1	38481	GCA_013806085.1_ASM1380608v1_bin_4	1765	1765	HyAsP	38217	0.993139471427458	0.046	1765	1	0.088	0	0	no	0	0	no	no	NA	NA	NA	NA
GCA_013806085.1_ASM1380608v1	CP057048.1	38481	GCA_013806085.1_ASM1380608v1_bin_3	36452	36452	HyAsP	38217	0.993139471427458	0.947	36452	1	0.973	0	0	yes	0	0	no	no	NA	NA	NA	NA
GCA_013806085.1_ASM1380608v1	CP057049.1	4671	GCA_013806085.1_ASM1380608v1_bin_1	4671	4748	HyAsP	4671	1	1	4671	0.984	0.992	0	0	yes	0	0	no	no	NA	NA	NA	NA
GCA_013806525.1_ASM1380652v1	CP057051.1	129449	GCA_013806525.1_ASM1380652v1_bin_4	52919	138272	HyAsP	123310	0.952575917929069	0.409	52919	0.383	0.396	84941	0.614303691275168	no	0	0	no	no	NA	NA	NA	NA
GCA_013806525.1_ASM1380652v1	CP057052.1	93415	GCA_013806525.1_ASM1380652v1_bin_7	90713	93722	HyAsP	90713	0.971075309104534	0.971	90713	0.968	0.969	0	0	yes	0	0	no	no	NA	NA	NA	NA
GCA_013806525.1_ASM1380652v1	CP057053.1	38481	GCA_013806525.1_ASM1380652v1_bin_3	38217	38217	HyAsP	38217	0.993139471427458	0.993	38217	1	0.996	0	0	yes	0	0	no	no	NA	NA	NA	NA
GCA_013806525.1_ASM1380652v1	CP057054.1	4671	GCA_013806525.1_ASM1380652v1_bin_1	4671	4748	HyAsP	4671	1	1	4671	0.984	0.992	0	0	yes	0	0	no	no	NA	NA	NA	NA
GCA_013806725.1_ASM1380672v1	CP057056.1	96046	GCA_013806725.1_ASM1380672v1_bin_13	33270	34704	HyAsP	89416	0.930970576598713	0.346	33270	0.959	0.509	1221	0.0351832641770401	no	0	0	no	no	NA	NA	NA	NA
GCA_013806725.1_ASM1380672v1	CP057056.1	96046	GCA_013806725.1_ASM1380672v1_bin_5	27356	28488	HyAsP	89416	0.930970576598713	0.285	27356	0.96	0.44	0	0	no	0	0	no	no	NA	NA	NA	NA
GCA_013812015.1_ASM1381201v1	CP057073.1	137565	not_detected	0	not_applicable	HyAsP	137565	1	NA	0	NA	NA	not_applicable	not_applicable	no	0	0	no	no	NA	NA	NA	NA
GCA_013812015.1_ASM1381201v1	CP057074.1	4145	GCA_013812015.1_ASM1381201v1_bin_6	3507	5104	HyAsP	3507	0.846079613992762	0.846	3507	0.687	0.758	0	0	no	0	0	no	no	NA	NA	NA	NA
GCA_013812225.1_ASM1381222v1	CP057084.1	1948	not_detected	0	not_applicable	HyAsP	1891	0.970739219712526	NA	0	NA	NA	not_applicable	not_applicable	no	0	0	no	no	NA	NA	NA	NA
GCA_013812225.1_ASM1381222v1	CP057076.1	123830	GCA_013812225.1_ASM1381222v1_bin_19	1274	3844	HyAsP	97210	0.785027860776871	0.01	1274	0.331	0.019	0	0	no	0	0	no	no	NA	NA	NA	NA
GCA_013812225.1_ASM1381222v1	CP057076.1	123830	GCA_013812225.1_ASM1381222v1_bin_9	28181	28539	HyAsP	97210	0.785027860776871	0.228	28181	0.987	0.37	0	0	no	0	0	no	no	NA	NA	NA	NA
GCA_013812225.1_ASM1381222v1	CP057076.1	123830	GCA_013812225.1_ASM1381222v1_bin_15	4520	2412	HyAsP	97210	0.785027860776871	0.037	2260	0.937	0.071	2260	0.93698175787728	no	0	0	no	no	NA	NA	NA	NA
GCA_013812225.1_ASM1381222v1	CP057076.1	123830	GCA_013812225.1_ASM1381222v1_bin_21	2109	2109	HyAsP	97210	0.785027860776871	0.017	2109	1	0.033	0	0	no	0	0	no	no	NA	NA	NA	NA
GCA_013812225.1_ASM1381222v1	CP057076.1	123830	GCA_013812225.1_ASM1381222v1_bin_26	1274	1658	HyAsP	97210	0.785027860776871	0.01	1274	0.768	0.02	0	0	no	0	0	no	no	NA	NA	NA	NA
GCA_013812225.1_ASM1381222v1	CP057076.1	123830	GCA_013812225.1_ASM1381222v1_bin_6	4426	4426	HyAsP	97210	0.785027860776871	0.036	4426	1	0.069	0	0	no	0	0	no	no	NA	NA	NA	NA
GCA_013812225.1_ASM1381222v1	CP057076.1	123830	GCA_013812225.1_ASM1381222v1_bin_3	4520	2515	HyAsP	97210	0.785027860776871	0.037	2260	0.899	0.071	2260	0.898608349900596	no	0	0	no	no	NA	NA	NA	NA
GCA_013812225.1_ASM1381222v1	CP057076.1	123830	GCA_013812225.1_ASM1381222v1_bin_14	1028	6260	HyAsP	97210	0.785027860776871	0.008	1028	0.164	0.015	0	0	no	0	0	no	no	NA	NA	NA	NA
GCA_013812225.1_ASM1381222v1	CP057076.1	123830	GCA_013812225.1_ASM1381222v1_bin_13	34057	42096	HyAsP	97210	0.785027860776871	0.275	34057	0.809	0.41	0	0	no	0	0	no	no	NA	NA	NA	NA
GCA_013812225.1_ASM1381222v1	CP057076.1	123830	GCA_013812225.1_ASM1381222v1_bin_1	2658	1329	HyAsP	97210	0.785027860776871	0.021	1329	1	0.041	1329	1	no	0	0	no	no	NA	NA	NA	NA
GCA_013812225.1_ASM1381222v1	CP057076.1	123830	GCA_013812225.1_ASM1381222v1_bin_18	9654	10508	HyAsP	97210	0.785027860776871	0.078	9654	0.919	0.144	0	0	no	0	0	no	no	NA	NA	NA	NA
GCA_013812225.1_ASM1381222v1	CP057076.1	123830	GCA_013812225.1_ASM1381222v1_bin_2	1038	1493	HyAsP	97210	0.785027860776871	0.008	1038	0.695	0.016	1038	0.695244474212994	no	0	0	no	no	NA	NA	NA	NA
GCA_013812225.1_ASM1381222v1	CP057076.1	123830	GCA_013812225.1_ASM1381222v1_bin_5	1456	1456	HyAsP	97210	0.785027860776871	0.012	1456	1	0.024	0	0	no	0	0	no	no	NA	NA	NA	NA
GCA_013812225.1_ASM1381222v1	CP057077.1	51116	GCA_013812225.1_ASM1381222v1_bin_10	40143	40326	HyAsP	47683	0.932839032788168	0.785	40143	0.995	0.878	0	0	no	5	0	yes	no	5	5	5	1
GCA_013812225.1_ASM1381222v1	CP057077.1	51116	GCA_013812225.1_ASM1381222v1_bin_16	6474	6474	HyAsP	47683	0.932839032788168	0.127	6474	1	0.225	0	0	no	5	0	yes	no	NA	NA	NA	NA
GCA_013812225.1_ASM1381222v1	CP057078.1	50516	GCA_013812225.1_ASM1381222v1_bin_22	5504	123077	HyAsP	39524	0.782405574471455	0.109	5504	0.045	0.064	116918	0.949958156276152	no	0	0	no	no	NA	NA	NA	NA
GCA_013812225.1_ASM1381222v1	CP057078.1	50516	GCA_013812225.1_ASM1381222v1_bin_14	3839	6260	HyAsP	39524	0.782405574471455	0.076	3839	0.613	0.135	0	0	no	0	0	no	no	NA	NA	NA	NA
GCA_013812225.1_ASM1381222v1	CP057078.1	50516	GCA_013812225.1_ASM1381222v1_bin_13	2793	42096	HyAsP	39524	0.782405574471455	0.055	2793	0.066	0.06	0	0	no	0	0	no	no	NA	NA	NA	NA
GCA_013812225.1_ASM1381222v1	CP057079.1	27257	GCA_013812225.1_ASM1381222v1_bin_8	5248	5248	HyAsP	23247	0.852881828521114	0.193	5248	1	0.324	0	0	no	0	0	no	no	NA	NA	NA	NA
GCA_013812225.1_ASM1381222v1	CP057079.1	27257	GCA_013812225.1_ASM1381222v1_bin_7	6625	6625	HyAsP	23247	0.852881828521114	0.243	6625	1	0.391	0	0	no	0	0	no	no	NA	NA	NA	NA
GCA_013812225.1_ASM1381222v1	CP057079.1	27257	GCA_013812225.1_ASM1381222v1_bin_20	2989	2989	HyAsP	23247	0.852881828521114	0.11	2989	1	0.198	0	0	no	0	0	no	no	NA	NA	NA	NA
GCA_013812225.1_ASM1381222v1	CP057079.1	27257	GCA_013812225.1_ASM1381222v1_bin_2	1038	1493	HyAsP	23247	0.852881828521114	0.038	1038	0.695	0.072	1038	0.695244474212994	no	0	0	no	no	NA	NA	NA	NA
GCA_013812225.1_ASM1381222v1	CP057080.1	5973	not_detected	0	not_applicable	HyAsP	4658	0.779842625146492	NA	0	NA	NA	not_applicable	not_applicable	no	0	0	no	no	NA	NA	NA	NA
GCA_013812225.1_ASM1381222v1	CP057081.1	5552	GCA_013812225.1_ASM1381222v1_bin_25	4220	4220	HyAsP	4220	0.760086455331412	0.76	4220	1	0.864	0	0	no	0	0	no	no	NA	NA	NA	NA
GCA_013812225.1_ASM1381222v1	CP057082.1	4678	not_detected	0	not_applicable	HyAsP	4678	1	NA	0	NA	NA	not_applicable	not_applicable	no	0	0	no	no	NA	NA	NA	NA
GCA_013812225.1_ASM1381222v1	CP057083.1	3702	not_detected	0	not_applicable	HyAsP	1159	0.313074014046461	NA	0	NA	NA	not_applicable	not_applicable	no	0	0	no	no	NA	NA	NA	NA
GCA_013812575.1_ASM1381257v1	CP057088.1	140512	GCA_013812575.1_ASM1381257v1_bin_7	7326	3377	HyAsP	126612	0.90107606467775	0.052	2442	0.723	0.097	0	0	no	1	0	yes	no	NA	NA	NA	NA
GCA_013812575.1_ASM1381257v1	CP057088.1	140512	GCA_013812575.1_ASM1381257v1_bin_2	16322	17810	HyAsP	126612	0.90107606467775	0.116	16322	0.916	0.206	0	0	no	1	0	yes	no	NA	NA	NA	NA
GCA_013812575.1_ASM1381257v1	CP057088.1	140512	GCA_013812575.1_ASM1381257v1_bin_3	25351	25892	HyAsP	126612	0.90107606467775	0.18	19385	0.749	0.29	0	0	no	1	0	yes	no	1	1	1	1
GCA_013812575.1_ASM1381257v1	CP057088.1	140512	GCA_013812575.1_ASM1381257v1_bin_6	43122	44595	HyAsP	126612	0.90107606467775	0.307	43122	0.967	0.466	0	0	no	1	0	yes	no	NA	NA	NA	NA
GCA_013812575.1_ASM1381257v1	CP057088.1	140512	GCA_013812575.1_ASM1381257v1_bin_8	15996	18837	HyAsP	126612	0.90107606467775	0.114	15996	0.849	0.201	0	0	no	1	0	yes	no	NA	NA	NA	NA
GCA_013812575.1_ASM1381257v1	CP057089.1	45753	GCA_013812575.1_ASM1381257v1_bin_4	6529	6529	HyAsP	39862	0.871243415732302	0.143	6529	1	0.25	0	0	no	0	0	no	no	NA	NA	NA	NA
GCA_013812575.1_ASM1381257v1	CP057089.1	45753	GCA_013812575.1_ASM1381257v1_bin_1	32267	34841	HyAsP	39862	0.871243415732302	0.705	32267	0.926	0.801	0	0	no	0	0	no	no	NA	NA	NA	NA
GCA_013813585.1_ASM1381358v1	CP057110.1	106811	GCA_013813585.1_ASM1381358v1_bin_6	38734	42304	HyAsP	101771	0.952813848760895	0.363	38734	0.916	0.52	0	0	no	0	0	no	no	NA	NA	NA	NA
GCA_013813585.1_ASM1381358v1	CP057110.1	106811	GCA_013813585.1_ASM1381358v1_bin_3	25342	27857	HyAsP	101771	0.952813848760895	0.237	25342	0.91	0.376	1010	0.0362565961876728	no	0	0	no	no	NA	NA	NA	NA
GCA_013813585.1_ASM1381358v1	CP057110.1	106811	GCA_013813585.1_ASM1381358v1_bin_7	27673	45060	HyAsP	101771	0.952813848760895	0.259	27673	0.614	0.364	16510	0.366400355082113	no	0	0	no	no	NA	NA	NA	NA
GCA_013813585.1_ASM1381358v1	CP057110.1	106811	GCA_013813585.1_ASM1381358v1_bin_2	7717	8699	HyAsP	101771	0.952813848760895	0.072	7717	0.887	0.133	0	0	no	0	0	no	no	NA	NA	NA	NA
GCA_013813585.1_ASM1381358v1	CP057110.1	106811	GCA_013813585.1_ASM1381358v1_bin_4	2380	2609	HyAsP	101771	0.952813848760895	0.022	2380	0.912	0.043	2380	0.912226906860866	no	0	0	no	no	NA	NA	NA	NA
GCA_013813585.1_ASM1381358v1	CP057111.1	5686	GCA_013813585.1_ASM1381358v1_bin_1	5686	5763	HyAsP	5686	1	1	5686	0.987	0.993	0	0	yes	0	0	no	no	NA	NA	NA	NA
GCA_013815235.1_ASM1381523v1	CP057134.1	136933	GCA_013815235.1_ASM1381523v1_bin_11	3213	3965	HyAsP	124046	0.905888281130188	0.023	3213	0.81	0.045	0	0	no	0	0	no	no	NA	NA	NA	NA
GCA_013815235.1_ASM1381523v1	CP057134.1	136933	GCA_013815235.1_ASM1381523v1_bin_8	1630	48671	HyAsP	124046	0.905888281130188	0.012	1630	0.033	0.018	0	0	no	0	0	no	no	NA	NA	NA	NA
GCA_013815235.1_ASM1381523v1	CP057134.1	136933	GCA_013815235.1_ASM1381523v1_bin_14	25904	27652	HyAsP	124046	0.905888281130188	0.189	25904	0.937	0.315	0	0	no	0	0	no	no	NA	NA	NA	NA
GCA_013815235.1_ASM1381523v1	CP057135.1	100897	GCA_013815235.1_ASM1381523v1_bin_4	1052	2767	HyAsP	85464	0.84704203296431	0.01	1052	0.38	0.019	0	0	no	0	0	no	no	NA	NA	NA	NA
GCA_013815235.1_ASM1381523v1	CP057135.1	100897	GCA_013815235.1_ASM1381523v1_bin_8	43244	48671	HyAsP	85464	0.84704203296431	0.429	43244	0.888	0.579	0	0	no	0	0	no	no	NA	NA	NA	NA
GCA_013815235.1_ASM1381523v1	CP057135.1	100897	GCA_013815235.1_ASM1381523v1_bin_9	1052	1586	HyAsP	85464	0.84704203296431	0.01	1052	0.663	0.02	0	0	no	0	0	no	no	NA	NA	NA	NA
GCA_013815235.1_ASM1381523v1	CP057135.1	100897	GCA_013815235.1_ASM1381523v1_bin_1	2986	3485	HyAsP	85464	0.84704203296431	0.03	2986	0.857	0.058	0	0	no	0	0	no	no	NA	NA	NA	NA
GCA_013815235.1_ASM1381523v1	CP057135.1	100897	GCA_013815235.1_ASM1381523v1_bin_7	3496	4625	HyAsP	85464	0.84704203296431	0.035	3496	0.756	0.067	0	0	no	0	0	no	no	NA	NA	NA	NA
GCA_013815235.1_ASM1381523v1	CP057135.1	100897	GCA_013815235.1_ASM1381523v1_bin_3	7326	7326	HyAsP	85464	0.84704203296431	0.073	7326	1	0.136	0	0	no	0	0	no	no	NA	NA	NA	NA
GCA_013815445.1_ASM1381544v1	CP057138.1	86321	GCA_013815445.1_ASM1381544v1_bin_3	6987	7064	HyAsP	84277	0.976320941601696	0.081	6987	0.989	0.15	1258	0.178086070215176	no	0	0	no	no	NA	NA	NA	NA
GCA_013815445.1_ASM1381544v1	CP057138.1	86321	GCA_013815445.1_ASM1381544v1_bin_1	77363	77887	HyAsP	84277	0.976320941601696	0.896	77363	0.993	0.942	0	0	no	0	0	no	no	NA	NA	NA	NA
GCA_013815865.1_ASM1381586v1	CP057140.1	105018	GCA_013815865.1_ASM1381586v1_bin_5	17232	18272	HyAsP	99089	0.943543011674189	0.164	17232	0.943	0.279	0	0	no	0	0	no	no	NA	NA	NA	NA
GCA_013815865.1_ASM1381586v1	CP057140.1	105018	GCA_013815865.1_ASM1381586v1_bin_1	5137	5137	HyAsP	99089	0.943543011674189	0.049	5137	1	0.093	0	0	no	0	0	no	no	NA	NA	NA	NA
GCA_013815865.1_ASM1381586v1	CP057140.1	105018	GCA_013815865.1_ASM1381586v1_bin_3	3590	3690	HyAsP	99089	0.943543011674189	0.034	3590	0.973	0.066	0	0	no	0	0	no	no	NA	NA	NA	NA
GCA_013815865.1_ASM1381586v1	CP057140.1	105018	GCA_013815865.1_ASM1381586v1_bin_4	46981	47407	HyAsP	99089	0.943543011674189	0.447	46981	0.991	0.616	0	0	no	0	0	no	no	NA	NA	NA	NA
GCA_013815865.1_ASM1381586v1	CP057140.1	105018	GCA_013815865.1_ASM1381586v1_bin_2	5931	6389	HyAsP	99089	0.943543011674189	0.056	5931	0.928	0.106	0	0	no	0	0	no	no	NA	NA	NA	NA
GCA_013816045.1_ASM1381604v1	CP057142.1	89539	GCA_013816045.1_ASM1381604v1_bin_4	88959	90622	HyAsP	88959	0.993522375724545	0.994	88959	0.982	0.988	2532	0.0279402352629604	yes	0	0	no	no	NA	NA	NA	NA
GCA_013816045.1_ASM1381604v1	CP057143.1	4821	not_detected	0	not_applicable	HyAsP	4786	0.992740095415889	NA	0	NA	NA	not_applicable	not_applicable	no	0	0	no	no	NA	NA	NA	NA
GCA_013818265.1_ASM1381826v1	CP057172.1	94854	GCA_013818265.1_ASM1381826v1_bin_4	94854	95008	HyAsP	94854	1	1	94854	0.998	0.999	0	0	yes	0	0	no	no	NA	NA	NA	NA
GCA_013819805.1_ASM1381980v1	CP057224.1	102840	GCA_013819805.1_ASM1381980v1_bin_1	55048	59397	HyAsP	94402	0.917950213924543	0.535	55048	0.927	0.678	0	0	no	0	0	no	no	NA	NA	NA	NA
GCA_013819805.1_ASM1381980v1	CP057224.1	102840	GCA_013819805.1_ASM1381980v1_bin_2	35925	38558	HyAsP	94402	0.917950213924543	0.349	35925	0.932	0.508	0	0	no	0	0	no	no	NA	NA	NA	NA
GCA_013819985.1_ASM1381998v1	CP057226.1	143708	GCA_013819985.1_ASM1381998v1_bin_3	142338	143526	HyAsP	142338	0.990466779859159	0.99	142338	0.992	0.991	0	0	yes	0	0	no	no	NA	NA	NA	NA
GCA_013819985.1_ASM1381998v1	CP057227.1	6760	not_detected	0	not_applicable	HyAsP	6760	1	NA	0	NA	NA	not_applicable	not_applicable	no	0	0	no	no	NA	NA	NA	NA
GCA_013819985.1_ASM1381998v1	CP057228.1	2590	not_detected	0	not_applicable	HyAsP	0	0	NA	0	NA	NA	not_applicable	not_applicable	no	0	0	no	no	NA	NA	NA	NA
GCA_013821185.1_ASM1382118v1	CP057251.1	110652	GCA_013821185.1_ASM1382118v1_bin_5	110235	310280	HyAsP	110235	0.996231428261577	0.996	110235	0.355	0.523	160902	0.518570323578703	no	0	0	no	no	NA	NA	NA	NA
GCA_013821185.1_ASM1382118v1	CP057252.1	109291	GCA_013821185.1_ASM1382118v1_bin_4	52595	56997	HyAsP	105048	0.96117704111043	0.481	52595	0.923	0.632	1981	0.0347562152393986	no	0	0	no	no	NA	NA	NA	NA
GCA_013821185.1_ASM1382118v1	CP057252.1	109291	GCA_013821185.1_ASM1382118v1_bin_5	35992	310280	HyAsP	105048	0.96117704111043	0.329	34360	0.111	0.166	160902	0.518570323578703	no	0	0	no	no	NA	NA	NA	NA
GCA_013821185.1_ASM1382118v1	CP057253.1	4671	GCA_013821185.1_ASM1382118v1_bin_1	4671	4748	HyAsP	4671	1	1	4671	0.984	0.992	0	0	yes	0	0	no	no	NA	NA	NA	NA
GCA_013821835.1_ASM1382183v1	CP057260.1	93611	GCA_013821835.1_ASM1382183v1_bin_3	20841	21440	HyAsP	80728	0.862377284720813	0.223	20841	0.972	0.363	0	0	no	0	0	no	no	NA	NA	NA	NA
GCA_013821835.1_ASM1382183v1	CP057260.1	93611	GCA_013821835.1_ASM1382183v1_bin_10	2121	31128	HyAsP	80728	0.862377284720813	0.023	2121	0.068	0.034	29985	0.963280647648419	no	0	0	no	no	NA	NA	NA	NA
GCA_013821835.1_ASM1382183v1	CP057260.1	93611	GCA_013821835.1_ASM1382183v1_bin_7	12705	15787	HyAsP	80728	0.862377284720813	0.136	12705	0.805	0.233	0	0	no	0	0	no	no	NA	NA	NA	NA
GCA_013821835.1_ASM1382183v1	CP057260.1	93611	GCA_013821835.1_ASM1382183v1_bin_9	5532	5532	HyAsP	80728	0.862377284720813	0.059	5532	1	0.111	0	0	no	0	0	no	no	NA	NA	NA	NA
GCA_013821835.1_ASM1382183v1	CP057260.1	93611	GCA_013821835.1_ASM1382183v1_bin_11	9766	12527	HyAsP	80728	0.862377284720813	0.104	9766	0.78	0.184	0	0	no	0	0	no	no	NA	NA	NA	NA
GCA_013821835.1_ASM1382183v1	CP057260.1	93611	GCA_013821835.1_ASM1382183v1_bin_8	18601	21945	HyAsP	80728	0.862377284720813	0.199	18601	0.848	0.322	0	0	no	0	0	no	no	NA	NA	NA	NA
GCA_013821835.1_ASM1382183v1	CP057261.1	5101	GCA_013821835.1_ASM1382183v1_bin_2	5101	5178	HyAsP	5101	1	1	5101	0.985	0.992	0	0	yes	0	0	no	no	NA	NA	NA	NA
GCA_013822325.1_ASM1382232v1	CP057271.1	221223	GCA_013822325.1_ASM1382232v1_bin_4	13584	14346	HyAsP	211328	0.955271377750053	0.061	12500	0.871	0.114	0	0	no	7	1	yes	yes	3	3	7	0.428571428571429
GCA_013822325.1_ASM1382232v1	CP057271.1	221223	GCA_013822325.1_ASM1382232v1_bin_12	4927	3997	HyAsP	211328	0.955271377750053	0.022	3843	0.961	0.043	0	0	no	7	1	yes	yes	2	2	7	0.285714285714286
GCA_013822325.1_ASM1382232v1	CP057271.1	221223	GCA_013822325.1_ASM1382232v1_bin_9	1193	2167	HyAsP	211328	0.955271377750053	0.005	1193	0.551	0.01	0	0	no	7	1	yes	yes	1	1	7	0.142857142857143
GCA_013822325.1_ASM1382232v1	CP057271.1	221223	GCA_013822325.1_ASM1382232v1_bin_5	1423	1423	HyAsP	211328	0.955271377750053	0.006	1423	1	0.012	0	0	no	7	1	yes	yes	NA	NA	NA	NA
GCA_013822325.1_ASM1382232v1	CP057271.1	221223	GCA_013822325.1_ASM1382232v1_bin_7	94444	96866	HyAsP	211328	0.955271377750053	0.427	94444	0.975	0.594	0	0	no	7	1	yes	yes	1	1	7	0.142857142857143
GCA_013822325.1_ASM1382232v1	CP057271.1	221223	GCA_013822325.1_ASM1382232v1_bin_13	6967	56932	HyAsP	211328	0.955271377750053	0.031	6967	0.122	0.049	47477	0.833924682076864	no	7	1	yes	yes	NA	NA	NA	NA
GCA_013822325.1_ASM1382232v1	CP057271.1	221223	GCA_013822325.1_ASM1382232v1_bin_10	90989	90989	HyAsP	211328	0.955271377750053	0.411	90989	1	0.583	0	0	no	7	1	yes	yes	NA	NA	NA	NA
GCA_013822325.1_ASM1382232v1	CP057272.1	5569	not_detected	0	not_applicable	HyAsP	5569	1	NA	0	NA	NA	not_applicable	not_applicable	no	0	0	no	no	NA	NA	NA	NA
GCA_013822575.1_ASM1382257v1	CP057277.1	221169	GCA_013822575.1_ASM1382257v1_bin_17	89992	91682	HyAsP	209299	0.946330634040033	0.407	89992	0.982	0.575	0	0	no	7	1	yes	yes	NA	NA	NA	NA
GCA_013822575.1_ASM1382257v1	CP057277.1	221169	GCA_013822575.1_ASM1382257v1_bin_14	1193	2013	HyAsP	209299	0.946330634040033	0.005	1193	0.593	0.01	0	0	no	7	1	yes	yes	1	1	7	0.142857142857143
GCA_013822575.1_ASM1382257v1	CP057277.1	221169	GCA_013822575.1_ASM1382257v1_bin_4	6235	6266	HyAsP	209299	0.946330634040033	0.028	6235	0.995	0.054	0	0	no	7	1	yes	yes	NA	NA	NA	NA
GCA_013822575.1_ASM1382257v1	CP057277.1	221169	GCA_013822575.1_ASM1382257v1_bin_10	1064	33597	HyAsP	209299	0.946330634040033	0.005	1064	0.032	0.009	1064	0.0316694943000863	no	7	1	yes	yes	NA	NA	NA	NA
GCA_013822575.1_ASM1382257v1	CP057277.1	221169	GCA_013822575.1_ASM1382257v1_bin_9	93037	95459	HyAsP	209299	0.946330634040033	0.421	93037	0.975	0.588	0	0	no	7	1	yes	yes	1	1	7	0.142857142857143
GCA_013822575.1_ASM1382257v1	CP057277.1	221169	GCA_013822575.1_ASM1382257v1_bin_19	4964	10127	HyAsP	209299	0.946330634040033	0.022	4964	0.49	0.042	1448	0.142984101905796	no	7	1	yes	yes	NA	NA	NA	NA
GCA_013822575.1_ASM1382257v1	CP057277.1	221169	GCA_013822575.1_ASM1382257v1_bin_3	1064	1421	HyAsP	209299	0.946330634040033	0.005	1064	0.749	0.01	1064	0.748768472906404	no	7	1	yes	yes	NA	NA	NA	NA
GCA_013822575.1_ASM1382257v1	CP057277.1	221169	GCA_013822575.1_ASM1382257v1_bin_16	4927	3997	HyAsP	209299	0.946330634040033	0.022	3843	0.961	0.043	0	0	no	7	1	yes	yes	2	2	7	0.285714285714286
GCA_013822575.1_ASM1382257v1	CP057277.1	221169	GCA_013822575.1_ASM1382257v1_bin_11	8741	9349	HyAsP	209299	0.946330634040033	0.04	7657	0.819	0.076	0	0	no	7	1	yes	yes	3	3	7	0.428571428571429
GCA_013822575.1_ASM1382257v1	CP057278.1	84509	GCA_013822575.1_ASM1382257v1_bin_22	2437	4435	HyAsP	71993	0.851897431042848	0.029	2437	0.549	0.055	3643	0.821420518602029	no	0	0	no	no	NA	NA	NA	NA
GCA_013822575.1_ASM1382257v1	CP057278.1	84509	GCA_013822575.1_ASM1382257v1_bin_10	30307	33597	HyAsP	71993	0.851897431042848	0.359	29243	0.87	0.508	1064	0.0316694943000863	no	0	0	no	no	NA	NA	NA	NA
GCA_013822575.1_ASM1382257v1	CP057278.1	84509	GCA_013822575.1_ASM1382257v1_bin_12	1769	1769	HyAsP	71993	0.851897431042848	0.021	1769	1	0.041	0	0	no	0	0	no	no	NA	NA	NA	NA
GCA_013822575.1_ASM1382257v1	CP057278.1	84509	GCA_013822575.1_ASM1382257v1_bin_3	2126	1421	HyAsP	71993	0.851897431042848	0.025	1062	0.747	0.048	1064	0.748768472906404	no	0	0	no	no	NA	NA	NA	NA
GCA_013822575.1_ASM1382257v1	CP057278.1	84509	GCA_013822575.1_ASM1382257v1_bin_18	10348	10790	HyAsP	71993	0.851897431042848	0.122	10348	0.959	0.216	0	0	no	0	0	no	no	NA	NA	NA	NA
GCA_013822575.1_ASM1382257v1	CP057278.1	84509	GCA_013822575.1_ASM1382257v1_bin_8	2437	3697	HyAsP	71993	0.851897431042848	0.029	2437	0.659	0.056	2437	0.659183121449824	no	0	0	no	no	NA	NA	NA	NA
GCA_013822575.1_ASM1382257v1	CP057279.1	5101	GCA_013822575.1_ASM1382257v1_bin_1	2404	2958	HyAsP	3485	0.683199372672025	0.471	2404	0.813	0.596	0	0	no	0	0	no	no	NA	NA	NA	NA
GCA_013822575.1_ASM1382257v1	CP057279.1	5101	GCA_013822575.1_ASM1382257v1_bin_6	1081	11565	HyAsP	3485	0.683199372672025	0.212	1081	0.093	0.129	10484	0.90652831820147	no	0	0	no	no	NA	NA	NA	NA
GCA_013822575.1_ASM1382257v1	CP057280.1	4044	GCA_013822575.1_ASM1382257v1_bin_2	1380	2056	HyAsP	1380	0.341246290801187	0.341	1380	0.671	0.452	0	0	no	0	0	no	no	NA	NA	NA	NA
GCA_013823335.1_ASM1382333v1	CP057179.1	73399	GCA_013823335.1_ASM1382333v1_bin_3	2686	1343	HyAsP	63870	0.870175342988324	0.037	1343	1	0.071	1343	1	no	0	0	no	no	NA	NA	NA	NA
GCA_013823335.1_ASM1382333v1	CP057179.1	73399	GCA_013823335.1_ASM1382333v1_bin_7	1869	1869	HyAsP	63870	0.870175342988324	0.025	1869	1	0.049	0	0	no	0	0	no	no	NA	NA	NA	NA
GCA_013823335.1_ASM1382333v1	CP057179.1	73399	GCA_013823335.1_ASM1382333v1_bin_1	1045	1272	HyAsP	63870	0.870175342988324	0.014	1045	0.822	0.028	1045	0.821540880503145	no	0	0	no	no	NA	NA	NA	NA
GCA_013823335.1_ASM1382333v1	CP057179.1	73399	GCA_013823335.1_ASM1382333v1_bin_14	27867	27867	HyAsP	63870	0.870175342988324	0.38	27867	1	0.551	0	0	no	0	0	no	no	NA	NA	NA	NA
GCA_013823335.1_ASM1382333v1	CP057179.1	73399	GCA_013823335.1_ASM1382333v1_bin_16	1045	2549	HyAsP	63870	0.870175342988324	0.014	1045	0.41	0.027	1045	0.409964692036093	no	0	0	no	no	NA	NA	NA	NA
GCA_013823335.1_ASM1382333v1	CP057180.1	54517	GCA_013823335.1_ASM1382333v1_bin_3	1343	1343	HyAsP	45656	0.83746354348185	0.025	1343	1	0.049	1343	1	no	1	0	yes	no	NA	NA	NA	NA
GCA_013823335.1_ASM1382333v1	CP057180.1	54517	GCA_013823335.1_ASM1382333v1_bin_8	3568	3568	HyAsP	45656	0.83746354348185	0.065	3568	1	0.122	0	0	no	1	0	yes	no	NA	NA	NA	NA
GCA_013823335.1_ASM1382333v1	CP057180.1	54517	GCA_013823335.1_ASM1382333v1_bin_13	22308	22308	HyAsP	45656	0.83746354348185	0.409	22308	1	0.581	0	0	no	1	0	yes	no	NA	NA	NA	NA
GCA_013823335.1_ASM1382333v1	CP057180.1	54517	GCA_013823335.1_ASM1382333v1_bin_1	1045	1272	HyAsP	45656	0.83746354348185	0.019	1045	0.822	0.037	1045	0.821540880503145	no	1	0	yes	no	NA	NA	NA	NA
GCA_013823335.1_ASM1382333v1	CP057180.1	54517	GCA_013823335.1_ASM1382333v1_bin_6	11998	11998	HyAsP	45656	0.83746354348185	0.22	11998	1	0.361	0	0	no	1	0	yes	no	1	1	1	1
GCA_013823335.1_ASM1382333v1	CP057180.1	54517	GCA_013823335.1_ASM1382333v1_bin_16	1045	2549	HyAsP	45656	0.83746354348185	0.019	1045	0.41	0.036	1045	0.409964692036093	no	1	0	yes	no	NA	NA	NA	NA
GCA_013823335.1_ASM1382333v1	CP057180.1	54517	GCA_013823335.1_ASM1382333v1_bin_2	1497	1497	HyAsP	45656	0.83746354348185	0.027	1497	1	0.053	0	0	no	1	0	yes	no	NA	NA	NA	NA
GCA_013823335.1_ASM1382333v1	CP057181.1	2974	not_detected	0	not_applicable	HyAsP	2911	0.978816408876933	NA	0	NA	NA	not_applicable	not_applicable	no	0	0	no	no	NA	NA	NA	NA
GCA_013823335.1_ASM1382333v1	CP057182.1	2519	not_detected	0	not_applicable	HyAsP	2519	1	NA	0	NA	NA	not_applicable	not_applicable	no	0	0	no	no	NA	NA	NA	NA
GCA_013823335.1_ASM1382333v1	CP057183.1	1603	not_detected	0	not_applicable	HyAsP	1170	0.729881472239551	NA	0	NA	NA	not_applicable	not_applicable	no	0	0	no	no	NA	NA	NA	NA
GCA_013823335.1_ASM1382333v1	CP057184.1	1552	not_detected	0	not_applicable	HyAsP	1058	0.681701030927835	NA	0	NA	NA	not_applicable	not_applicable	no	0	0	no	no	NA	NA	NA	NA
GCA_013823865.1_ASM1382386v1	CP057189.1	1551	not_detected	0	not_applicable	HyAsP	1551	1	NA	0	NA	NA	not_applicable	not_applicable	no	0	0	no	no	NA	NA	NA	NA
GCA_013823975.1_ASM1382397v1	CP057191.1	102988	GCA_013823975.1_ASM1382397v1_bin_3	97235	99484	HyAsP	100431	0.975171864683264	0.944	97235	0.977	0.96	0	0	yes	0	0	no	no	NA	NA	NA	NA
GCA_013823975.1_ASM1382397v1	CP057191.1	102988	GCA_013823975.1_ASM1382397v1_bin_2	8250	8353	HyAsP	100431	0.975171864683264	0.08	8250	0.988	0.148	0	0	no	0	0	no	no	NA	NA	NA	NA
GCA_013824345.1_ASM1382434v1	CP057195.1	115217	GCA_013824345.1_ASM1382434v1_bin_13	1369	2170	HyAsP	106286	0.922485397120217	0.012	1369	0.631	0.024	0	0	no	0	0	no	no	NA	NA	NA	NA
GCA_013824345.1_ASM1382434v1	CP057195.1	115217	GCA_013824345.1_ASM1382434v1_bin_3	9196	9574	HyAsP	106286	0.922485397120217	0.08	9196	0.961	0.148	0	0	no	0	0	no	no	NA	NA	NA	NA
GCA_013824345.1_ASM1382434v1	CP057195.1	115217	GCA_013824345.1_ASM1382434v1_bin_20	3367	32311	HyAsP	106286	0.922485397120217	0.029	3367	0.104	0.045	9652	0.298721797530253	no	0	0	no	no	NA	NA	NA	NA
GCA_013824345.1_ASM1382434v1	CP057195.1	115217	GCA_013824345.1_ASM1382434v1_bin_10	1694	1694	HyAsP	106286	0.922485397120217	0.015	1694	1	0.03	0	0	no	0	0	no	no	NA	NA	NA	NA
GCA_013824345.1_ASM1382434v1	CP057195.1	115217	GCA_013824345.1_ASM1382434v1_bin_5	51311	52690	HyAsP	106286	0.922485397120217	0.445	51311	0.974	0.611	0	0	no	0	0	no	no	NA	NA	NA	NA
GCA_013824345.1_ASM1382434v1	CP057195.1	115217	GCA_013824345.1_ASM1382434v1_bin_9	18329	19681	HyAsP	106286	0.922485397120217	0.159	18329	0.931	0.272	0	0	no	0	0	no	no	NA	NA	NA	NA
GCA_013824345.1_ASM1382434v1	CP057196.1	77708	GCA_013824345.1_ASM1382434v1_bin_6	24620	24923	HyAsP	69840	0.898749163535286	0.317	24620	0.988	0.48	0	0	no	0	0	no	no	NA	NA	NA	NA
GCA_013824345.1_ASM1382434v1	CP057196.1	77708	GCA_013824345.1_ASM1382434v1_bin_16	11002	11352	HyAsP	69840	0.898749163535286	0.142	11002	0.969	0.248	0	0	no	0	0	no	no	NA	NA	NA	NA
GCA_013824345.1_ASM1382434v1	CP057196.1	77708	GCA_013824345.1_ASM1382434v1_bin_1	1343	3254	HyAsP	69840	0.898749163535286	0.017	1343	0.413	0.033	1343	0.412722802704364	no	0	0	no	no	NA	NA	NA	NA
GCA_013824345.1_ASM1382434v1	CP057196.1	77708	GCA_013824345.1_ASM1382434v1_bin_14	1264	1889	HyAsP	69840	0.898749163535286	0.016	1264	0.669	0.031	0	0	no	0	0	no	no	NA	NA	NA	NA
GCA_013824345.1_ASM1382434v1	CP057196.1	77708	GCA_013824345.1_ASM1382434v1_bin_4	9999	12330	HyAsP	69840	0.898749163535286	0.129	9999	0.811	0.223	0	0	no	0	0	no	no	NA	NA	NA	NA
GCA_013824345.1_ASM1382434v1	CP057196.1	77708	GCA_013824345.1_ASM1382434v1_bin_20	14415	32311	HyAsP	69840	0.898749163535286	0.186	14415	0.446	0.263	9652	0.298721797530253	no	0	0	no	no	NA	NA	NA	NA
GCA_013824345.1_ASM1382434v1	CP057196.1	77708	GCA_013824345.1_ASM1382434v1_bin_8	6520	8116	HyAsP	69840	0.898749163535286	0.084	6520	0.803	0.152	0	0	no	0	0	no	no	NA	NA	NA	NA
GCA_013824345.1_ASM1382434v1	CP057196.1	77708	GCA_013824345.1_ASM1382434v1_bin_5	1027	52690	HyAsP	69840	0.898749163535286	0.013	1027	0.019	0.015	0	0	no	0	0	no	no	NA	NA	NA	NA
GCA_013824345.1_ASM1382434v1	CP057197.1	7329	not_detected	0	not_applicable	HyAsP	5471	0.746486560240142	NA	0	NA	NA	not_applicable	not_applicable	no	0	0	no	no	NA	NA	NA	NA
GCA_013824345.1_ASM1382434v1	CP057198.1	6275	not_detected	0	not_applicable	HyAsP	5987	0.954103585657371	NA	0	NA	NA	not_applicable	not_applicable	no	0	0	no	no	NA	NA	NA	NA
GCA_013824345.1_ASM1382434v1	CP057199.1	3782	not_detected	0	not_applicable	HyAsP	3494	0.923849814912745	NA	0	NA	NA	not_applicable	not_applicable	no	0	0	no	no	NA	NA	NA	NA
GCA_013824985.1_ASM1382498v1	CP057288.1	196445	GCA_013824985.1_ASM1382498v1_bin_12	33589	33589	HyAsP	185383	0.943689073277508	0.171	33589	1	0.292	0	0	no	12	0	yes	no	3	3	12	0.25
GCA_013824985.1_ASM1382498v1	CP057288.1	196445	GCA_013824985.1_ASM1382498v1_bin_8	12415	13933	HyAsP	185383	0.943689073277508	0.063	12415	0.891	0.118	0	0	no	12	0	yes	no	4	4	12	0.333333333333333
GCA_013824985.1_ASM1382498v1	CP057288.1	196445	GCA_013824985.1_ASM1382498v1_bin_2	6637	6792	HyAsP	185383	0.943689073277508	0.034	6637	0.977	0.066	6637	0.977179034157833	no	12	0	yes	no	1	1	12	0.0833333333333333
GCA_013824985.1_ASM1382498v1	CP057288.1	196445	GCA_013824985.1_ASM1382498v1_bin_6	90152	95715	HyAsP	185383	0.943689073277508	0.459	90152	0.942	0.617	5461	0.0570547980985217	no	12	0	yes	no	2	2	12	0.166666666666667
GCA_013824985.1_ASM1382498v1	CP057288.1	196445	GCA_013824985.1_ASM1382498v1_bin_5	29432	30499	HyAsP	185383	0.943689073277508	0.15	29432	0.965	0.26	0	0	no	12	0	yes	no	1	1	12	0.0833333333333333
GCA_013824985.1_ASM1382498v1	CP057289.1	85551	GCA_013824985.1_ASM1382498v1_bin_11	38714	101146	HyAsP	81595	0.953758576755386	0.453	38714	0.383	0.415	62432	0.617246356751626	no	0	0	no	no	NA	NA	NA	NA
GCA_013824985.1_ASM1382498v1	CP057289.1	85551	GCA_013824985.1_ASM1382498v1_bin_9	1343	1343	HyAsP	81595	0.953758576755386	0.016	1343	1	0.031	1343	1	no	0	0	no	no	NA	NA	NA	NA
GCA_013824985.1_ASM1382498v1	CP057290.1	44632	GCA_013824985.1_ASM1382498v1_bin_4	4519	4519	HyAsP	35956	0.805610324430902	0.101	4519	1	0.183	0	0	no	0	0	no	no	NA	NA	NA	NA
GCA_013824985.1_ASM1382498v1	CP057290.1	44632	GCA_013824985.1_ASM1382498v1_bin_7	1443	2214	HyAsP	35956	0.805610324430902	0.032	1443	0.652	0.061	1443	0.651761517615176	no	0	0	no	no	NA	NA	NA	NA
GCA_013824985.1_ASM1382498v1	CP057290.1	44632	GCA_013824985.1_ASM1382498v1_bin_3	8476	12066	HyAsP	35956	0.805610324430902	0.19	8476	0.702	0.299	0	0	no	0	0	no	no	NA	NA	NA	NA
GCA_013824985.1_ASM1382498v1	CP057290.1	44632	GCA_013824985.1_ASM1382498v1_bin_15	20402	23692	HyAsP	35956	0.805610324430902	0.457	20402	0.861	0.597	1365	0.0576143846023974	no	0	0	no	no	NA	NA	NA	NA
GCA_013824985.1_ASM1382498v1	CP057291.1	5128	GCA_013824985.1_ASM1382498v1_bin_1	5097	8870	HyAsP	5097	0.993954758190328	0.994	5097	0.575	0.729	0	0	no	0	0	no	no	NA	NA	NA	NA
GCA_013824985.1_ASM1382498v1	CP057292.1	3126	GCA_013824985.1_ASM1382498v1_bin_1	3095	8870	HyAsP	3095	0.990083173384517	0.99	3095	0.349	0.516	0	0	no	0	0	no	no	NA	NA	NA	NA
GCA_013825245.1_ASM1382524v1	CP057294.1	120503	GCA_013825245.1_ASM1382524v1_bin_13	46481	138089	HyAsP	104119	0.864036580002158	0.386	46481	0.337	0.36	82642	0.598469103259492	no	6	0	yes	no	NA	NA	NA	NA
GCA_013825245.1_ASM1382524v1	CP057294.1	120503	GCA_013825245.1_ASM1382524v1_bin_9	47506	103319	HyAsP	104119	0.864036580002158	0.394	47506	0.46	0.424	50662	0.490345435011953	no	6	0	yes	no	5	5	6	0.833333333333333
GCA_013825245.1_ASM1382524v1	CP057294.1	120503	GCA_013825245.1_ASM1382524v1_bin_3	9094	9864	HyAsP	104119	0.864036580002158	0.075	9094	0.922	0.139	0	0	no	6	0	yes	no	1	1	6	0.166666666666667
GCA_013825245.1_ASM1382524v1	CP057295.1	111016	GCA_013825245.1_ASM1382524v1_bin_18	38407	39987	HyAsP	76328	0.687540534697701	0.346	38407	0.96	0.509	0	0	no	1	0	yes	no	NA	NA	NA	NA
GCA_013825245.1_ASM1382524v1	CP057295.1	111016	GCA_013825245.1_ASM1382524v1_bin_17	5790	7323	HyAsP	76328	0.687540534697701	0.052	5790	0.791	0.098	0	0	no	1	0	yes	no	NA	NA	NA	NA
GCA_013825245.1_ASM1382524v1	CP057295.1	111016	GCA_013825245.1_ASM1382524v1_bin_4	5641	14446	HyAsP	76328	0.687540534697701	0.051	5641	0.39	0.09	0	0	no	1	0	yes	no	NA	NA	NA	NA
GCA_013825245.1_ASM1382524v1	CP057295.1	111016	GCA_013825245.1_ASM1382524v1_bin_5	5136	5136	HyAsP	76328	0.687540534697701	0.046	5136	1	0.088	0	0	no	1	0	yes	no	NA	NA	NA	NA
GCA_013825245.1_ASM1382524v1	CP057295.1	111016	GCA_013825245.1_ASM1382524v1_bin_7	6555	6555	HyAsP	76328	0.687540534697701	0.059	6555	1	0.111	0	0	no	1	0	yes	no	NA	NA	NA	NA
GCA_013825245.1_ASM1382524v1	CP057295.1	111016	GCA_013825245.1_ASM1382524v1_bin_15	7628	8611	HyAsP	76328	0.687540534697701	0.069	7628	0.886	0.128	0	0	no	1	0	yes	no	1	1	1	1
GCA_013825245.1_ASM1382524v1	CP057295.1	111016	GCA_013825245.1_ASM1382524v1_bin_1	1129	1416	HyAsP	76328	0.687540534697701	0.01	1129	0.797	0.02	1129	0.797316384180791	no	1	0	yes	no	NA	NA	NA	NA
GCA_013825245.1_ASM1382524v1	CP057296.1	107564	GCA_013825245.1_ASM1382524v1_bin_22	11538	13365	HyAsP	61429	0.571092558848685	0.107	11538	0.863	0.19	0	0	no	0	0	no	no	NA	NA	NA	NA
GCA_013825245.1_ASM1382524v1	CP057296.1	107564	GCA_013825245.1_ASM1382524v1_bin_6	4581	4581	HyAsP	61429	0.571092558848685	0.043	4581	1	0.082	0	0	no	0	0	no	no	NA	NA	NA	NA
GCA_013825245.1_ASM1382524v1	CP057296.1	107564	GCA_013825245.1_ASM1382524v1_bin_20	11111	15989	HyAsP	61429	0.571092558848685	0.103	11111	0.695	0.179	0	0	no	0	0	no	no	NA	NA	NA	NA
GCA_013825245.1_ASM1382524v1	CP057296.1	107564	GCA_013825245.1_ASM1382524v1_bin_23	1047	6045	HyAsP	61429	0.571092558848685	0.01	1047	0.173	0.019	0	0	no	0	0	no	no	NA	NA	NA	NA
GCA_013825245.1_ASM1382524v1	CP057296.1	107564	GCA_013825245.1_ASM1382524v1_bin_1	1129	1416	HyAsP	61429	0.571092558848685	0.01	1129	0.797	0.02	1129	0.797316384180791	no	0	0	no	no	NA	NA	NA	NA
GCA_013825245.1_ASM1382524v1	CP057297.1	71653	GCA_013825245.1_ASM1382524v1_bin_13	5501	138089	HyAsP	48592	0.678157229983392	0.077	5501	0.04	0.053	82642	0.598469103259492	no	0	0	no	no	NA	NA	NA	NA
GCA_013825245.1_ASM1382524v1	CP057297.1	71653	GCA_013825245.1_ASM1382524v1_bin_23	1542	6045	HyAsP	48592	0.678157229983392	0.022	1542	0.255	0.041	0	0	no	0	0	no	no	NA	NA	NA	NA
GCA_013825245.1_ASM1382524v1	CP057297.1	71653	GCA_013825245.1_ASM1382524v1_bin_1	1129	1416	HyAsP	48592	0.678157229983392	0.016	1129	0.797	0.031	1129	0.797316384180791	no	0	0	no	no	NA	NA	NA	NA
GCA_013825245.1_ASM1382524v1	CP057297.1	71653	GCA_013825245.1_ASM1382524v1_bin_10	11547	11701	HyAsP	48592	0.678157229983392	0.161	11547	0.987	0.277	0	0	no	0	0	no	no	NA	NA	NA	NA
GCA_013825245.1_ASM1382524v1	CP057298.1	7592	GCA_013825245.1_ASM1382524v1_bin_4	2105	14446	HyAsP	2105	0.277265542676502	0.277	2105	0.146	0.191	0	0	no	0	0	no	no	NA	NA	NA	NA
GCA_013825245.1_ASM1382524v1	CP057299.1	6507	GCA_013825245.1_ASM1382524v1_bin_16	1265	13388	HyAsP	4824	0.741355463347165	0.194	1265	0.094	0.127	0	0	no	0	0	no	no	NA	NA	NA	NA
GCA_013825245.1_ASM1382524v1	CP057300.1	5962	GCA_013825245.1_ASM1382524v1_bin_16	4748	13388	HyAsP	4748	0.796377054679638	0.796	4748	0.355	0.491	0	0	no	0	0	no	no	NA	NA	NA	NA
GCA_013825245.1_ASM1382524v1	CP057301.1	5775	GCA_013825245.1_ASM1382524v1_bin_16	5331	13388	HyAsP	5331	0.923116883116883	0.923	5331	0.398	0.556	0	0	no	0	0	no	no	NA	NA	NA	NA
GCA_013827205.1_ASM1382720v1	CP057337.1	9653	not_detected	0	not_applicable	HyAsP	9633	0.997928105252253	NA	0	NA	NA	not_applicable	not_applicable	no	0	0	no	no	NA	NA	NA	NA
GCA_013827205.1_ASM1382720v1	CP057338.1	6930	not_detected	0	not_applicable	HyAsP	6930	1	NA	0	NA	NA	not_applicable	not_applicable	no	0	0	no	no	NA	NA	NA	NA
GCA_013827205.1_ASM1382720v1	CP057339.1	1551	not_detected	0	not_applicable	HyAsP	1551	1	NA	0	NA	NA	not_applicable	not_applicable	no	0	0	no	no	NA	NA	NA	NA
GCA_013827445.1_ASM1382744v1	CP057343.1	119787	GCA_013827445.1_ASM1382744v1_bin_2	119119	119257	HyAsP	119119	0.994423434930335	0.994	119119	0.999	0.996	0	0	yes	8	0	yes	no	8	8	8	1
GCA_013827685.1_ASM1382768v1	CP057341.1	119787	GCA_013827685.1_ASM1382768v1_bin_2	119119	119257	HyAsP	119119	0.994423434930335	0.994	119119	0.999	0.996	0	0	yes	8	0	yes	no	8	8	8	1
GCA_013828065.1_ASM1382806v1	CP057348.1	119787	GCA_013828065.1_ASM1382806v1_bin_2	118202	119649	HyAsP	118202	0.986768180186498	0.987	118202	0.988	0.987	0	0	yes	8	0	yes	no	8	8	8	1
GCA_013828415.1_ASM1382841v1	CP057350.1	9653	not_detected	0	not_applicable	HyAsP	9653	1	NA	0	NA	NA	not_applicable	not_applicable	no	0	0	no	no	NA	NA	NA	NA
GCA_013828415.1_ASM1382841v1	CP057351.1	6930	not_detected	0	not_applicable	HyAsP	6930	1	NA	0	NA	NA	not_applicable	not_applicable	no	0	0	no	no	NA	NA	NA	NA
GCA_013828415.1_ASM1382841v1	CP057352.1	1551	GCA_013828415.1_ASM1382841v1_bin_2	1551	1628	HyAsP	1551	1	1	1551	0.953	0.976	0	0	yes	0	0	no	no	NA	NA	NA	NA
GCA_013829445.1_ASM1382944v1	CP057369.1	151320	GCA_013829445.1_ASM1382944v1_bin_3	6262	6262	HyAsP	126698	0.837285223367698	0.041	6262	1	0.079	0	0	no	8	0	yes	no	2	2	8	0.25
GCA_013829445.1_ASM1382944v1	CP057369.1	151320	GCA_013829445.1_ASM1382944v1_bin_10	11360	13273	HyAsP	126698	0.837285223367698	0.075	11360	0.856	0.138	11360	0.855872824531003	no	8	0	yes	no	NA	NA	NA	NA
GCA_013829445.1_ASM1382944v1	CP057369.1	151320	GCA_013829445.1_ASM1382944v1_bin_4	21899	129888	HyAsP	126698	0.837285223367698	0.145	21899	0.169	0.156	103756	0.798811283567381	no	8	0	yes	no	NA	NA	NA	NA
GCA_013829445.1_ASM1382944v1	CP057369.1	151320	GCA_013829445.1_ASM1382944v1_bin_9	43171	58493	HyAsP	126698	0.837285223367698	0.285	43171	0.738	0.411	15322	0.261945873865249	no	8	0	yes	no	NA	NA	NA	NA
GCA_013829445.1_ASM1382944v1	CP057369.1	151320	GCA_013829445.1_ASM1382944v1_bin_1	1086	34391	HyAsP	126698	0.837285223367698	0.007	1086	0.032	0.011	0	0	no	8	0	yes	no	1	1	8	0.125
GCA_013829445.1_ASM1382944v1	CP057369.1	151320	GCA_013829445.1_ASM1382944v1_bin_6	12657	17682	HyAsP	126698	0.837285223367698	0.084	12657	0.716	0.15	0	0	no	8	0	yes	no	6	6	8	0.75
GCA_013829445.1_ASM1382944v1	CP057369.1	151320	GCA_013829445.1_ASM1382944v1_bin_7	20784	24263	HyAsP	126698	0.837285223367698	0.137	20784	0.857	0.236	0	0	no	8	0	yes	no	NA	NA	NA	NA
GCA_013829445.1_ASM1382944v1	CP057369.1	151320	GCA_013829445.1_ASM1382944v1_bin_5	7200	9514	HyAsP	126698	0.837285223367698	0.048	7200	0.757	0.09	0	0	no	8	0	yes	no	NA	NA	NA	NA
GCA_013829445.1_ASM1382944v1	CP057370.1	44527	GCA_013829445.1_ASM1382944v1_bin_1	32108	34391	HyAsP	39912	0.89635502054933	0.721	32108	0.934	0.814	0	0	no	1	0	yes	no	1	1	1	1
GCA_013829445.1_ASM1382944v1	CP057370.1	44527	GCA_013829445.1_ASM1382944v1_bin_6	1086	17682	HyAsP	39912	0.89635502054933	0.024	1086	0.061	0.034	0	0	no	1	0	yes	no	1	6	1	1
GCA_013829445.1_ASM1382944v1	CP057370.1	44527	GCA_013829445.1_ASM1382944v1_bin_2	5957	7710	HyAsP	39912	0.89635502054933	0.134	5957	0.773	0.228	0	0	no	1	0	yes	no	NA	NA	NA	NA
GCA_013829905.1_ASM1382990v1	CP057379.1	43019	GCA_013829905.1_ASM1382990v1_bin_4	1012	2367	HyAsP	37357	0.86838373741835	0.024	1012	0.428	0.045	0	0	no	4	0	yes	no	NA	NA	NA	NA
GCA_013829905.1_ASM1382990v1	CP057379.1	43019	GCA_013829905.1_ASM1382990v1_bin_3	23970	25727	HyAsP	37357	0.86838373741835	0.557	23970	0.932	0.697	0	0	no	4	0	yes	no	3	3	4	0.75
GCA_013829905.1_ASM1382990v1	CP057379.1	43019	GCA_013829905.1_ASM1382990v1_bin_11	1586	1586	HyAsP	37357	0.86838373741835	0.037	1586	1	0.071	0	0	no	4	0	yes	no	NA	NA	NA	NA
GCA_013829905.1_ASM1382990v1	CP057379.1	43019	GCA_013829905.1_ASM1382990v1_bin_2	4488	4488	HyAsP	37357	0.86838373741835	0.104	4488	1	0.188	0	0	no	4	0	yes	no	NA	NA	NA	NA
GCA_013830785.1_ASM1383078v1	CP057397.1	243494	GCA_013830785.1_ASM1383078v1_bin_2	8884	16969	HyAsP	233852	0.960401488332361	0.036	8884	0.524	0.067	0	0	no	6	0	yes	no	NA	NA	NA	NA
GCA_013830785.1_ASM1383078v1	CP057397.1	243494	GCA_013830785.1_ASM1383078v1_bin_6	15371	43205	HyAsP	233852	0.960401488332361	0.063	15371	0.356	0.107	0	0	no	6	0	yes	no	5	5	6	0.833333333333333
GCA_013830785.1_ASM1383078v1	CP057397.1	243494	GCA_013830785.1_ASM1383078v1_bin_5	195916	258989	HyAsP	233852	0.960401488332361	0.805	195916	0.756	0.78	0	0	no	6	0	yes	no	1	1	6	0.166666666666667
GCA_013830785.1_ASM1383078v1	CP057397.1	243494	GCA_013830785.1_ASM1383078v1_bin_3	3740	2031	HyAsP	233852	0.960401488332361	0.015	1870	0.921	0.03	1870	0.920728705071393	no	6	0	yes	no	NA	NA	NA	NA
GCA_013830785.1_ASM1383078v1	CP057397.1	243494	GCA_013830785.1_ASM1383078v1_bin_8	7192	200398	HyAsP	233852	0.960401488332361	0.03	7192	0.036	0.033	53785	0.268390902104811	no	6	0	yes	no	1	1	6	0.166666666666667
GCA_013830785.1_ASM1383078v1	CP057397.1	243494	GCA_013830785.1_ASM1383078v1_bin_4	3740	145167	HyAsP	233852	0.960401488332361	0.015	1870	0.013	0.014	68481	0.471739444915167	no	6	0	yes	no	NA	NA	NA	NA
GCA_013830785.1_ASM1383078v1	CP057397.1	243494	GCA_013830785.1_ASM1383078v1_bin_9	2684	1706	HyAsP	233852	0.960401488332361	0.011	1342	0.787	0.022	1342	0.786635404454865	no	6	0	yes	no	NA	NA	NA	NA
GCA_013830785.1_ASM1383078v1	CP057398.1	165151	GCA_013830785.1_ASM1383078v1_bin_6	9320	43205	HyAsP	138042	0.835853249450503	0.056	9320	0.216	0.089	0	0	no	0	0	no	no	NA	NA	NA	NA
GCA_013830785.1_ASM1383078v1	CP057398.1	165151	GCA_013830785.1_ASM1383078v1_bin_5	49827	258989	HyAsP	138042	0.835853249450503	0.302	49827	0.192	0.235	0	0	no	0	0	no	no	NA	NA	NA	NA
GCA_013830785.1_ASM1383078v1	CP057398.1	165151	GCA_013830785.1_ASM1383078v1_bin_3	3740	2031	HyAsP	138042	0.835853249450503	0.023	1870	0.921	0.045	1870	0.920728705071393	no	0	0	no	no	NA	NA	NA	NA
GCA_013830785.1_ASM1383078v1	CP057398.1	165151	GCA_013830785.1_ASM1383078v1_bin_8	61994	200398	HyAsP	138042	0.835853249450503	0.375	60062	0.3	0.333	53785	0.268390902104811	no	0	0	no	no	NA	NA	NA	NA
GCA_013830785.1_ASM1383078v1	CP057398.1	165151	GCA_013830785.1_ASM1383078v1_bin_4	7339	145167	HyAsP	138042	0.835853249450503	0.044	5469	0.038	0.041	68481	0.471739444915167	no	0	0	no	no	NA	NA	NA	NA
GCA_013830785.1_ASM1383078v1	CP057398.1	165151	GCA_013830785.1_ASM1383078v1_bin_9	1342	1706	HyAsP	138042	0.835853249450503	0.008	1342	0.787	0.016	1342	0.786635404454865	no	0	0	no	no	NA	NA	NA	NA
GCA_013830785.1_ASM1383078v1	CP057399.1	110894	GCA_013830785.1_ASM1383078v1_bin_2	16072	16969	HyAsP	81884	0.738398831316392	0.145	16072	0.947	0.251	0	0	no	1	0	yes	no	1	1	1	1
GCA_013830785.1_ASM1383078v1	CP057399.1	110894	GCA_013830785.1_ASM1383078v1_bin_6	9221	43205	HyAsP	81884	0.738398831316392	0.083	9221	0.213	0.119	0	0	no	1	0	yes	no	NA	NA	NA	NA
GCA_013830785.1_ASM1383078v1	CP057399.1	110894	GCA_013830785.1_ASM1383078v1_bin_5	4602	258989	HyAsP	81884	0.738398831316392	0.041	4602	0.018	0.025	0	0	no	1	0	yes	no	NA	NA	NA	NA
GCA_013830785.1_ASM1383078v1	CP057399.1	110894	GCA_013830785.1_ASM1383078v1_bin_4	52479	145167	HyAsP	81884	0.738398831316392	0.473	52479	0.362	0.41	68481	0.471739444915167	no	1	0	yes	no	NA	NA	NA	NA
GCA_013830785.1_ASM1383078v1	CP057400.1	97590	GCA_013830785.1_ASM1383078v1_bin_6	7465	43205	HyAsP	79254	0.812111896710729	0.076	7465	0.173	0.106	0	0	no	1	0	yes	no	1	5	1	1
GCA_013830785.1_ASM1383078v1	CP057400.1	97590	GCA_013830785.1_ASM1383078v1_bin_5	1964	258989	HyAsP	79254	0.812111896710729	0.02	1964	0.008	0.011	0	0	no	1	0	yes	no	NA	NA	NA	NA
GCA_013830785.1_ASM1383078v1	CP057400.1	97590	GCA_013830785.1_ASM1383078v1_bin_3	1870	2031	HyAsP	79254	0.812111896710729	0.019	1870	0.921	0.037	1870	0.920728705071393	no	1	0	yes	no	NA	NA	NA	NA
GCA_013830785.1_ASM1383078v1	CP057400.1	97590	GCA_013830785.1_ASM1383078v1_bin_8	67480	200398	HyAsP	79254	0.812111896710729	0.691	67480	0.337	0.453	53785	0.268390902104811	no	1	0	yes	no	1	1	1	1
GCA_013830785.1_ASM1383078v1	CP057400.1	97590	GCA_013830785.1_ASM1383078v1_bin_4	3781	145167	HyAsP	79254	0.812111896710729	0.039	3781	0.026	0.031	68481	0.471739444915167	no	1	0	yes	no	NA	NA	NA	NA
GCA_013830785.1_ASM1383078v1	CP057400.1	97590	GCA_013830785.1_ASM1383078v1_bin_9	1342	1706	HyAsP	79254	0.812111896710729	0.014	1342	0.787	0.028	1342	0.786635404454865	no	1	0	yes	no	NA	NA	NA	NA
GCA_013830785.1_ASM1383078v1	CP057401.1	6888	GCA_013830785.1_ASM1383078v1_bin_1	6888	6965	HyAsP	6888	1	1	6888	0.989	0.994	0	0	yes	0	0	no	no	NA	NA	NA	NA
GCA_013832285.1_ASM1383228v1	CP057424.1	112965	GCA_013832285.1_ASM1383228v1_bin_5	6784	1696	HyAsP	107501	0.951631036161643	0.06	1696	1	0.113	0	0	no	0	0	no	no	NA	NA	NA	NA
GCA_013832285.1_ASM1383228v1	CP057424.1	112965	GCA_013832285.1_ASM1383228v1_bin_7	25784	28868	HyAsP	107501	0.951631036161643	0.228	25784	0.893	0.363	0	0	no	0	0	no	no	NA	NA	NA	NA
GCA_013832285.1_ASM1383228v1	CP057424.1	112965	GCA_013832285.1_ASM1383228v1_bin_2	68614	72487	HyAsP	107501	0.951631036161643	0.607	68614	0.947	0.74	1340	0.0184860733648792	no	0	0	no	no	NA	NA	NA	NA
GCA_013832285.1_ASM1383228v1	CP057424.1	112965	GCA_013832285.1_ASM1383228v1_bin_3	3280	3280	HyAsP	107501	0.951631036161643	0.029	3280	1	0.056	0	0	no	0	0	no	no	NA	NA	NA	NA
GCA_013832285.1_ASM1383228v1	CP057425.1	6888	GCA_013832285.1_ASM1383228v1_bin_1	6759	11745	HyAsP	6759	0.981271777003484	0.981	6759	0.575	0.725	0	0	no	0	0	no	no	NA	NA	NA	NA
GCA_013832285.1_ASM1383228v1	CP057426.1	6676	not_detected	0	not_applicable	HyAsP	6676	1	NA	0	NA	NA	not_applicable	not_applicable	no	0	0	no	no	NA	NA	NA	NA
GCA_013832285.1_ASM1383228v1	CP057427.1	4241	GCA_013832285.1_ASM1383228v1_bin_1	4112	11745	HyAsP	4112	0.969582645602452	0.97	4112	0.35	0.514	0	0	no	0	0	no	no	NA	NA	NA	NA
GCA_013832285.1_ASM1383228v1	CP057428.1	1552	not_detected	0	not_applicable	HyAsP	1552	1	NA	0	NA	NA	not_applicable	not_applicable	no	0	0	no	no	NA	NA	NA	NA
GCA_013832525.1_ASM1383252v1	CP057433.1	96190	GCA_013832525.1_ASM1383252v1_bin_6	95235	97145	HyAsP	95235	0.990071733028381	0.99	95235	0.98	0.985	0	0	yes	0	0	no	no	NA	NA	NA	NA
GCA_013832525.1_ASM1383252v1	CP057434.1	52356	GCA_013832525.1_ASM1383252v1_bin_4	21333	23626	HyAsP	51484	0.983344793337917	0.407	21333	0.903	0.561	3760	0.159146702785067	no	0	0	no	no	NA	NA	NA	NA
GCA_013832965.1_ASM1383296v1	CP057439.1	96190	GCA_013832965.1_ASM1383296v1_bin_6	95235	95977	HyAsP	95235	0.990071733028381	0.99	95235	0.992	0.991	0	0	yes	0	0	no	no	NA	NA	NA	NA
GCA_013832965.1_ASM1383296v1	CP057440.1	52356	GCA_013832965.1_ASM1383296v1_bin_4	21333	23626	HyAsP	51484	0.983344793337917	0.407	21333	0.903	0.561	3760	0.159146702785067	no	0	0	no	no	NA	NA	NA	NA
GCA_013833985.1_ASM1383398v1	CP057454.1	4315	not_detected	0	not_applicable	HyAsP	4315	1	NA	0	NA	NA	not_applicable	not_applicable	no	0	0	no	no	NA	NA	NA	NA
GCA_013834305.1_ASM1383430v1	CP057456.1	95109	GCA_013834305.1_ASM1383430v1_bin_4	92640	95294	HyAsP	92640	0.974040311642431	0.974	92640	0.972	0.973	0	0	yes	0	0	no	no	NA	NA	NA	NA
GCA_013834305.1_ASM1383430v1	CP057457.1	6811	GCA_013834305.1_ASM1383430v1_bin_1	6811	6888	HyAsP	6811	1	1	6811	0.989	0.994	0	0	yes	0	0	no	no	NA	NA	NA	NA
GCA_013835585.1_ASM1383558v1	CP057474.1	83477	GCA_013835585.1_ASM1383558v1_bin_7	27229	38449	HyAsP	82676	0.990404542568612	0.326	27229	0.708	0.446	9915	0.257874066945824	no	0	0	no	no	NA	NA	NA	NA
GCA_013835585.1_ASM1383558v1	CP057474.1	83477	GCA_013835585.1_ASM1383558v1_bin_3	55447	55914	HyAsP	82676	0.990404542568612	0.664	55447	0.992	0.796	0	0	no	0	0	no	no	NA	NA	NA	NA
GCA_013835785.1_ASM1383578v1	CP057476.1	98711	GCA_013835785.1_ASM1383578v1_bin_7	96677	98819	HyAsP	96677	0.979394393735247	0.979	96677	0.978	0.978	0	0	yes	0	0	no	no	NA	NA	NA	NA
GCA_013835785.1_ASM1383578v1	CP057477.1	84397	GCA_013835785.1_ASM1383578v1_bin_9	17279	18369	HyAsP	80167	0.949879735061673	0.205	17279	0.941	0.337	0	0	no	0	0	no	no	NA	NA	NA	NA
GCA_013835785.1_ASM1383578v1	CP057477.1	84397	GCA_013835785.1_ASM1383578v1_bin_12	32510	32818	HyAsP	80167	0.949879735061673	0.385	32510	0.991	0.555	1201	0.0365957706136876	no	0	0	no	no	NA	NA	NA	NA
GCA_013835785.1_ASM1383578v1	CP057477.1	84397	GCA_013835785.1_ASM1383578v1_bin_6	14849	15103	HyAsP	80167	0.949879735061673	0.176	14849	0.983	0.299	0	0	no	0	0	no	no	NA	NA	NA	NA
GCA_013835785.1_ASM1383578v1	CP057477.1	84397	GCA_013835785.1_ASM1383578v1_bin_15	1310	2566	HyAsP	80167	0.949879735061673	0.016	1310	0.511	0.031	1310	0.510522213561964	no	0	0	no	no	NA	NA	NA	NA
GCA_013835785.1_ASM1383578v1	CP057478.1	58013	GCA_013835785.1_ASM1383578v1_bin_4	19324	39674	HyAsP	56223	0.969144846844673	0.333	19324	0.487	0.396	0	0	no	0	0	no	no	NA	NA	NA	NA
GCA_013835785.1_ASM1383578v1	CP057478.1	58013	GCA_013835785.1_ASM1383578v1_bin_3	24807	24807	HyAsP	56223	0.969144846844673	0.428	24807	1	0.599	0	0	no	0	0	no	no	NA	NA	NA	NA
GCA_013835785.1_ASM1383578v1	CP057478.1	58013	GCA_013835785.1_ASM1383578v1_bin_2	12158	12866	HyAsP	56223	0.969144846844673	0.21	12158	0.945	0.344	0	0	no	0	0	no	no	NA	NA	NA	NA
GCA_013837755.1_ASM1383775v1	CP057494.1	144318	GCA_013837755.1_ASM1383775v1_bin_5	123571	231165	HyAsP	143581	0.994893221912721	0.856	123571	0.535	0.658	103150	0.446218069344408	no	0	0	no	no	NA	NA	NA	NA
GCA_013837755.1_ASM1383775v1	CP057494.1	144318	GCA_013837755.1_ASM1383775v1_bin_3	1196	1196	HyAsP	143581	0.994893221912721	0.008	1196	1	0.016	1196	1	no	0	0	no	no	NA	NA	NA	NA
GCA_013837755.1_ASM1383775v1	CP057495.1	6826	GCA_013837755.1_ASM1383775v1_bin_1	6826	6903	HyAsP	6826	1	1	6826	0.989	0.994	0	0	yes	0	0	no	no	NA	NA	NA	NA
GCA_013837755.1_ASM1383775v1	CP057496.1	6229	GCA_013837755.1_ASM1383775v1_bin_2	3043	3043	HyAsP	4831	0.775565901428801	0.489	3043	1	0.657	0	0	no	0	0	no	no	NA	NA	NA	NA
GCA_013837755.1_ASM1383775v1	CP057497.1	5147	not_detected	0	not_applicable	HyAsP	1609	0.31260928696328	NA	0	NA	NA	not_applicable	not_applicable	no	0	0	no	no	NA	NA	NA	NA
GCA_013837755.1_ASM1383775v1	CP057498.1	2590	not_detected	0	not_applicable	HyAsP	1718	0.663320463320463	NA	0	NA	NA	not_applicable	not_applicable	no	0	0	no	no	NA	NA	NA	NA
GCA_013837755.1_ASM1383775v1	CP057499.1	1551	not_detected	0	not_applicable	HyAsP	1551	1	NA	0	NA	NA	not_applicable	not_applicable	no	0	0	no	no	NA	NA	NA	NA
GCA_013884735.1_ASM1388473v1	CP057524.1	86339	GCA_013884735.1_ASM1388473v1_bin_1	1258	1258	HyAsP	84295	0.976325878224209	0.015	1258	1	0.03	1258	1	no	0	0	no	no	NA	NA	NA	NA
GCA_013884735.1_ASM1388473v1	CP057524.1	86339	GCA_013884735.1_ASM1388473v1_bin_2	54283	54437	HyAsP	84295	0.976325878224209	0.629	54283	0.997	0.771	0	0	no	0	0	no	no	NA	NA	NA	NA
GCA_013884935.1_ASM1388493v1	CP057536.1	109433	GCA_013884935.1_ASM1388493v1_bin_4	78146	81573	HyAsP	101610	0.928513336927618	0.714	78146	0.958	0.818	2581	0.0316403712012553	no	0	0	no	no	NA	NA	NA	NA
GCA_013884935.1_ASM1388493v1	CP057536.1	109433	GCA_013884935.1_ASM1388493v1_bin_2	9545	10366	HyAsP	101610	0.928513336927618	0.087	9545	0.921	0.159	1443	0.13920509357515	no	0	0	no	no	NA	NA	NA	NA
GCA_013884935.1_ASM1388493v1	CP057537.1	6930	not_detected	0	not_applicable	HyAsP	6845	0.987734487734488	NA	0	NA	NA	not_applicable	not_applicable	no	0	0	no	no	NA	NA	NA	NA
GCA_013884935.1_ASM1388493v1	CP057538.1	4721	GCA_013884935.1_ASM1388493v1_bin_1	4636	4636	HyAsP	4636	0.981995339970345	0.982	4636	1	0.991	0	0	yes	0	0	no	no	NA	NA	NA	NA
GCA_013885155.1_ASM1388515v1	CP057540.1	98678	GCA_013885155.1_ASM1388515v1_bin_4	2528	2724	HyAsP	92624	0.938648938973226	0.026	2528	0.928	0.051	0	0	no	0	0	no	no	NA	NA	NA	NA
GCA_013885155.1_ASM1388515v1	CP057540.1	98678	GCA_013885155.1_ASM1388515v1_bin_6	90096	155761	HyAsP	92624	0.938648938973226	0.913	90096	0.578	0.708	62321	0.400106573532527	no	0	0	no	no	NA	NA	NA	NA
GCA_013885155.1_ASM1388515v1	CP057540.1	98678	GCA_013885155.1_ASM1388515v1_bin_8	3086	53661	HyAsP	92624	0.938648938973226	0.031	3086	0.058	0.04	0	0	no	0	0	no	no	NA	NA	NA	NA
GCA_013885155.1_ASM1388515v1	CP057541.1	60884	GCA_013885155.1_ASM1388515v1_bin_2	4230	6153	HyAsP	56381	0.926039682018264	0.069	4230	0.687	0.125	0	0	no	0	0	no	no	NA	NA	NA	NA
GCA_013885155.1_ASM1388515v1	CP057541.1	60884	GCA_013885155.1_ASM1388515v1_bin_6	3086	155761	HyAsP	56381	0.926039682018264	0.051	3086	0.02	0.029	62321	0.400106573532527	no	0	0	no	no	NA	NA	NA	NA
GCA_013885155.1_ASM1388515v1	CP057541.1	60884	GCA_013885155.1_ASM1388515v1_bin_8	52151	53661	HyAsP	56381	0.926039682018264	0.857	52151	0.972	0.911	0	0	no	0	0	no	no	NA	NA	NA	NA
GCA_013885155.1_ASM1388515v1	CP057542.1	7198	GCA_013885155.1_ASM1388515v1_bin_5	7198	10763	HyAsP	7198	1	1	7198	0.669	0.802	0	0	no	0	0	no	no	NA	NA	NA	NA
GCA_013885155.1_ASM1388515v1	CP057543.1	6230	GCA_013885155.1_ASM1388515v1_bin_3	6230	6307	HyAsP	6230	1	1	6230	0.988	0.994	0	0	yes	0	0	no	no	NA	NA	NA	NA
GCA_013885155.1_ASM1388515v1	CP057544.1	3257	GCA_013885155.1_ASM1388515v1_bin_5	3257	10763	HyAsP	3257	1	1	3257	0.303	0.465	0	0	no	0	0	no	no	NA	NA	NA	NA
GCA_013885915.1_ASM1388591v1	CP057560.1	109880	GCA_013885915.1_ASM1388591v1_bin_3	109880	110108	HyAsP	109880	1	1	109880	0.998	0.999	0	0	yes	0	0	no	no	NA	NA	NA	NA
GCA_013886475.1_ASM1388647v1	CP057571.1	121488	GCA_013886475.1_ASM1388647v1_bin_5	46439	51144	HyAsP	115518	0.950859344132754	0.382	45394	0.888	0.534	1962	0.0383622712341624	no	0	0	no	no	NA	NA	NA	NA
GCA_013886475.1_ASM1388647v1	CP057571.1	121488	GCA_013886475.1_ASM1388647v1_bin_4	41037	218553	HyAsP	115518	0.950859344132754	0.338	41037	0.188	0.242	81235	0.371694737660888	no	0	0	no	no	NA	NA	NA	NA
GCA_013886475.1_ASM1388647v1	CP057571.1	121488	GCA_013886475.1_ASM1388647v1_bin_2	11590	21789	HyAsP	115518	0.950859344132754	0.095	11590	0.532	0.161	8996	0.412868878792051	no	0	0	no	no	NA	NA	NA	NA
GCA_013886475.1_ASM1388647v1	CP057572.1	92191	GCA_013886475.1_ASM1388647v1_bin_4	90767	218553	HyAsP	90767	0.984553806770726	0.985	90767	0.415	0.584	81235	0.371694737660888	no	0	0	no	no	NA	NA	NA	NA
GCA_013886475.1_ASM1388647v1	CP057573.1	4671	GCA_013886475.1_ASM1388647v1_bin_1	4671	4748	HyAsP	4671	1	1	4671	0.984	0.992	0	0	yes	0	0	no	no	NA	NA	NA	NA
GCA_013886595.1_ASM1388659v1	CP057578.1	78258	GCA_013886595.1_ASM1388659v1_bin_2	77798	78879	HyAsP	77798	0.994122006695801	0.994	77798	0.986	0.99	0	0	yes	0	0	no	no	NA	NA	NA	NA
GCA_013886595.1_ASM1388659v1	CP057579.1	32449	GCA_013886595.1_ASM1388659v1_bin_1	32059	32757	HyAsP	32059	0.987981139634503	0.988	32059	0.979	0.983	0	0	yes	0	0	no	no	NA	NA	NA	NA
GCA_013886735.1_ASM1388673v1	CP057581.1	54794	GCA_013886735.1_ASM1388673v1_bin_1	13522	13753	HyAsP	52467	0.957531846552542	0.247	13522	0.983	0.395	1258	0.0914709517923362	no	0	0	no	no	NA	NA	NA	NA
GCA_013886735.1_ASM1388673v1	CP057581.1	54794	GCA_013886735.1_ASM1388673v1_bin_2	17279	18215	HyAsP	52467	0.957531846552542	0.315	17279	0.949	0.473	0	0	no	0	0	no	no	NA	NA	NA	NA
GCA_013888235.1_ASM1388823v1	CP057601.1	63983	GCA_013888235.1_ASM1388823v1_bin_2	3172	3559	HyAsP	62678	0.979603957301158	0.05	3172	0.891	0.095	0	0	no	0	0	no	no	NA	NA	NA	NA
GCA_013888235.1_ASM1388823v1	CP057601.1	63983	GCA_013888235.1_ASM1388823v1_bin_1	4970	5413	HyAsP	62678	0.979603957301158	0.078	4970	0.918	0.144	0	0	no	0	0	no	no	NA	NA	NA	NA
GCA_013888235.1_ASM1388823v1	CP057601.1	63983	GCA_013888235.1_ASM1388823v1_bin_3	54536	54749	HyAsP	62678	0.979603957301158	0.852	54536	0.996	0.918	0	0	no	0	0	no	no	NA	NA	NA	NA
GCA_013888235.1_ASM1388823v1	CP057602.1	3524	not_detected	0	not_applicable	HyAsP	0	0	NA	0	NA	NA	not_applicable	not_applicable	no	0	0	no	no	NA	NA	NA	NA
GCA_013888615.1_ASM1388861v1	CP057606.1	89809	GCA_013888615.1_ASM1388861v1_bin_4	89229	90553	HyAsP	89229	0.993541849925954	0.994	89229	0.985	0.989	2532	0.0279615252945789	yes	0	0	no	no	NA	NA	NA	NA
GCA_013888615.1_ASM1388861v1	CP057607.1	2719	not_detected	0	not_applicable	HyAsP	2702	0.993747701360794	NA	0	NA	NA	not_applicable	not_applicable	no	0	0	no	no	NA	NA	NA	NA
GCA_013889395.1_ASM1388939v1	CP057613.1	89809	GCA_013889395.1_ASM1388939v1_bin_4	89229	90368	HyAsP	89229	0.993541849925954	0.994	89229	0.987	0.99	2532	0.0280187677053824	yes	0	0	no	no	NA	NA	NA	NA
GCA_013889395.1_ASM1388939v1	CP057614.1	2719	not_detected	0	not_applicable	HyAsP	2719	1	NA	0	NA	NA	not_applicable	not_applicable	no	0	0	no	no	NA	NA	NA	NA
GCA_013890395.1_ASM1389039v1	CP057622.1	116595	GCA_013890395.1_ASM1389039v1_bin_6	8867	12234	HyAsP	115535	0.990908701059222	0.076	7536	0.616	0.135	5729	0.468285107078633	no	0	0	no	no	NA	NA	NA	NA
GCA_013890395.1_ASM1389039v1	CP057622.1	116595	GCA_013890395.1_ASM1389039v1_bin_3	74415	118076	HyAsP	115535	0.990908701059222	0.638	74415	0.63	0.634	41715	0.353289406822724	no	0	0	no	no	NA	NA	NA	NA
GCA_013890395.1_ASM1389039v1	CP057622.1	116595	GCA_013890395.1_ASM1389039v1_bin_2	8105	15936	HyAsP	115535	0.990908701059222	0.07	8105	0.509	0.123	7831	0.491403112449799	no	0	0	no	no	NA	NA	NA	NA
GCA_013890395.1_ASM1389039v1	CP057622.1	116595	GCA_013890395.1_ASM1389039v1_bin_5	3746	4638	HyAsP	115535	0.990908701059222	0.032	3746	0.808	0.062	3746	0.807675722294092	no	0	0	no	no	NA	NA	NA	NA
GCA_013890395.1_ASM1389039v1	CP057623.1	97938	GCA_013890395.1_ASM1389039v1_bin_4	97938	98015	HyAsP	97938	1	1	97938	0.999	0.999	0	0	yes	0	0	no	no	NA	NA	NA	NA
GCA_013890395.1_ASM1389039v1	CP057624.1	6647	GCA_013890395.1_ASM1389039v1_bin_1	6515	11934	HyAsP	6515	0.980141417180683	0.98	6515	0.546	0.701	0	0	no	0	0	no	no	NA	NA	NA	NA
GCA_013890395.1_ASM1389039v1	CP057625.1	4671	GCA_013890395.1_ASM1389039v1_bin_1	4539	11934	HyAsP	4539	0.971740526653821	0.972	4539	0.38	0.546	0	0	no	0	0	no	no	NA	NA	NA	NA
GCA_013890795.1_ASM1389079v1	CP057635.1	109773	GCA_013890795.1_ASM1389079v1_bin_7	43560	44099	HyAsP	99446	0.905924043252895	0.397	43560	0.988	0.566	1299	0.0294564502596431	no	7	1	yes	yes	NA	NA	NA	NA
GCA_013890795.1_ASM1389079v1	CP057635.1	109773	GCA_013890795.1_ASM1389079v1_bin_6	11472	11472	HyAsP	99446	0.905924043252895	0.105	11472	1	0.19	0	0	no	7	1	yes	yes	NA	NA	NA	NA
GCA_013890795.1_ASM1389079v1	CP057635.1	109773	GCA_013890795.1_ASM1389079v1_bin_14	7660	10123	HyAsP	99446	0.905924043252895	0.07	7660	0.757	0.128	0	0	no	7	1	yes	yes	2	4	7	0.285714285714286
GCA_013890795.1_ASM1389079v1	CP057635.1	109773	GCA_013890795.1_ASM1389079v1_bin_13	1462	2592	HyAsP	99446	0.905924043252895	0.013	1462	0.564	0.025	0	0	no	7	1	yes	yes	NA	NA	NA	NA
GCA_013890795.1_ASM1389079v1	CP057635.1	109773	GCA_013890795.1_ASM1389079v1_bin_5	23226	24858	HyAsP	99446	0.905924043252895	0.212	23226	0.934	0.346	1463	0.0588542923807225	no	7	1	yes	yes	NA	NA	NA	NA
GCA_013890795.1_ASM1389079v1	CP057635.1	109773	GCA_013890795.1_ASM1389079v1_bin_2	3147	24503	HyAsP	99446	0.905924043252895	0.029	3147	0.128	0.047	21969	0.896584091743868	no	7	1	yes	yes	NA	NA	NA	NA
GCA_013890795.1_ASM1389079v1	CP057635.1	109773	GCA_013890795.1_ASM1389079v1_bin_3	7717	7717	HyAsP	99446	0.905924043252895	0.07	7717	1	0.131	0	0	no	7	1	yes	yes	NA	NA	NA	NA
GCA_013890795.1_ASM1389079v1	CP057635.1	109773	GCA_013890795.1_ASM1389079v1_bin_9	2364	17392	HyAsP	99446	0.905924043252895	0.022	2364	0.136	0.038	12924	0.74310027598896	no	7	1	yes	yes	1	2	7	0.142857142857143
GCA_013891215.1_ASM1389121v1	CP057639.1	109773	GCA_013891215.1_ASM1389121v1_bin_9	5189	21812	HyAsP	101488	0.92452606743006	0.047	5189	0.238	0.078	18239	0.836191087474785	no	7	1	yes	yes	2	8	7	0.285714285714286
GCA_013891215.1_ASM1389121v1	CP057639.1	109773	GCA_013891215.1_ASM1389121v1_bin_18	2776	4929	HyAsP	101488	0.92452606743006	0.025	2776	0.563	0.048	0	0	no	7	1	yes	yes	1	1	7	0.142857142857143
GCA_013891215.1_ASM1389121v1	CP057639.1	109773	GCA_013891215.1_ASM1389121v1_bin_11	27517	27748	HyAsP	101488	0.92452606743006	0.251	27517	0.992	0.401	1299	0.0468141848061122	no	7	1	yes	yes	NA	NA	NA	NA
GCA_013891215.1_ASM1389121v1	CP057639.1	109773	GCA_013891215.1_ASM1389121v1_bin_2	1346	1346	HyAsP	101488	0.92452606743006	0.012	1346	1	0.024	0	0	no	7	1	yes	yes	NA	NA	NA	NA
GCA_013891215.1_ASM1389121v1	CP057639.1	109773	GCA_013891215.1_ASM1389121v1_bin_12	25822	29237	HyAsP	101488	0.92452606743006	0.235	25822	0.883	0.371	3754	0.128398946540343	no	7	1	yes	yes	4	5	7	0.571428571428571
GCA_013891215.1_ASM1389121v1	CP057639.1	109773	GCA_013891215.1_ASM1389121v1_bin_13	1050	2027	HyAsP	101488	0.92452606743006	0.01	1050	0.518	0.02	1050	0.518006906758757	no	7	1	yes	yes	NA	NA	NA	NA
GCA_013891215.1_ASM1389121v1	CP057639.1	109773	GCA_013891215.1_ASM1389121v1_bin_10	23226	23226	HyAsP	101488	0.92452606743006	0.212	23226	1	0.35	0	0	no	7	1	yes	yes	NA	NA	NA	NA
GCA_013891215.1_ASM1389121v1	CP057639.1	109773	GCA_013891215.1_ASM1389121v1_bin_7	11472	11472	HyAsP	101488	0.92452606743006	0.105	11472	1	0.19	0	0	no	7	1	yes	yes	NA	NA	NA	NA
[truncated: 5,244 more rows]
